# Supplementary material
Source: PubMed Central journal article supplement (PMC5063455)

# **Development of Enantiospecific Coupling of Secondary and Tertiary Boronic Esters with Aromatic Compounds**

Marcin Odachowski, Amadeu Bonet, Stephanie Essafi, Philip Conti-Ramsden, Jeremy N. Harvey, Daniele Leonori and Varinder K. Aggarwal

School of Chemistry, University of Bristol, Cantock's Close, Bristol BS8 1TS, UK

## **Supporting Material II**

NMR spectra, GC, SFC & HPLC chromatograms

1e

$^1\text{H}$  NMR (400 MHz,  $\text{CDCl}_3$ )

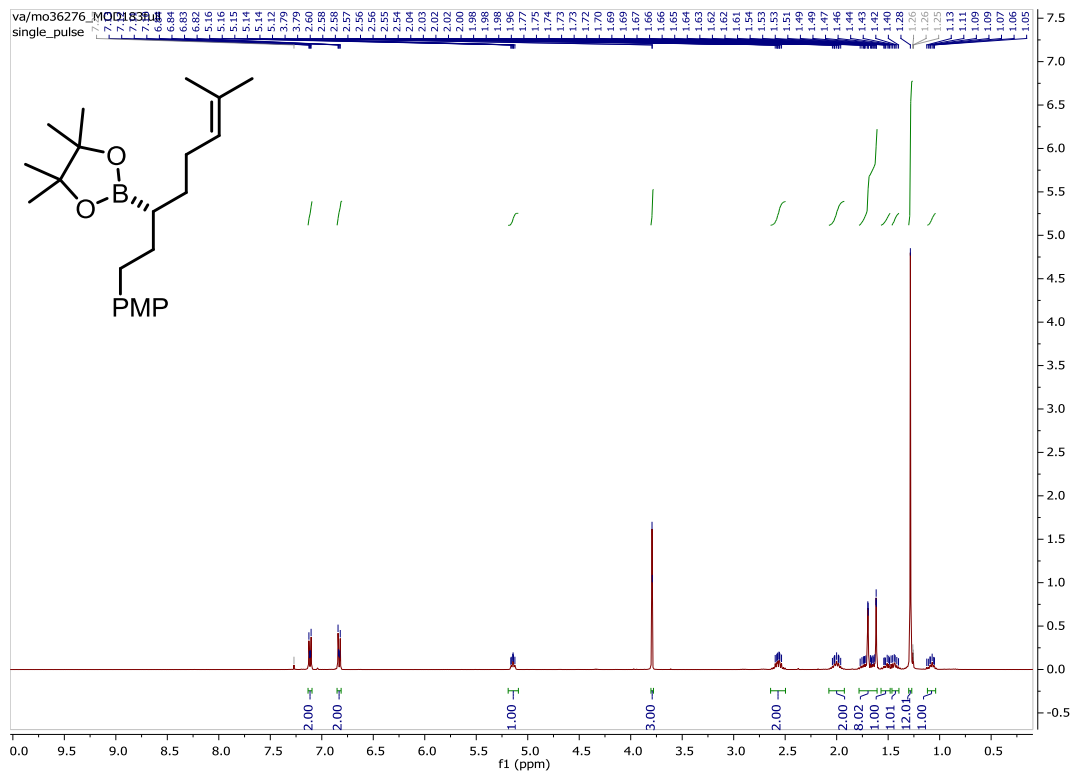

$^{13}\text{C}$  NMR (100 MHz,  $\text{CDCl}_3$ )

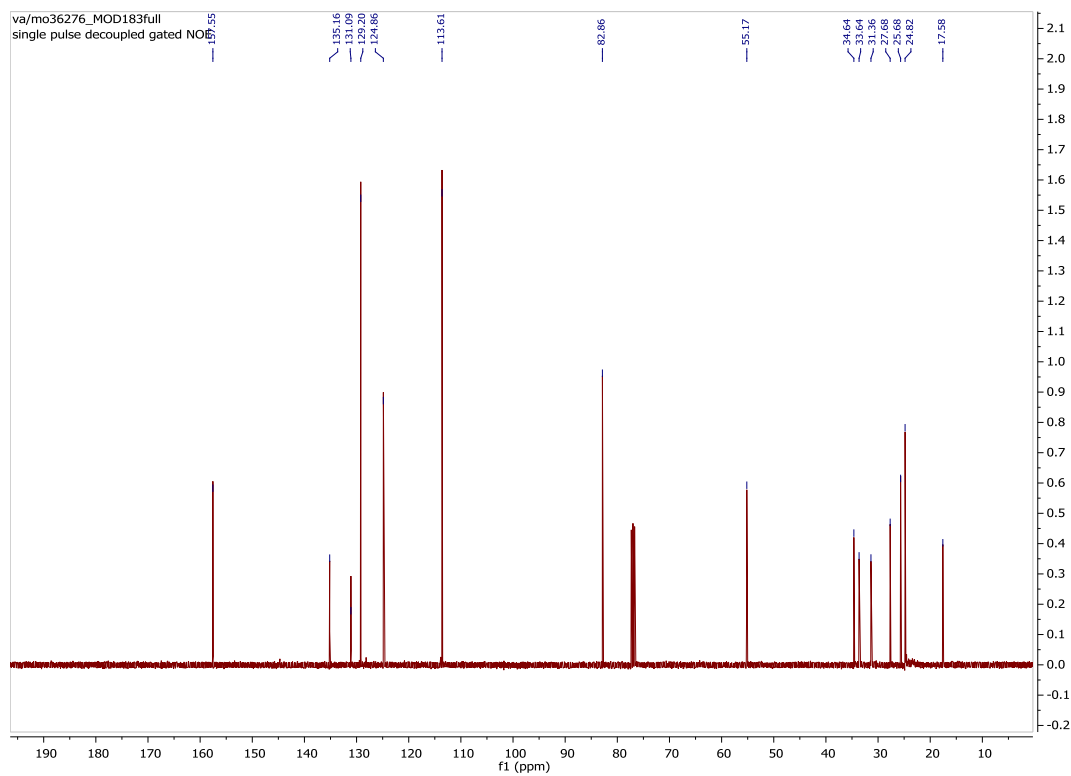

# $^{11}\text{B}$ NMR (96 MHz, NONE)<sup>1</sup>

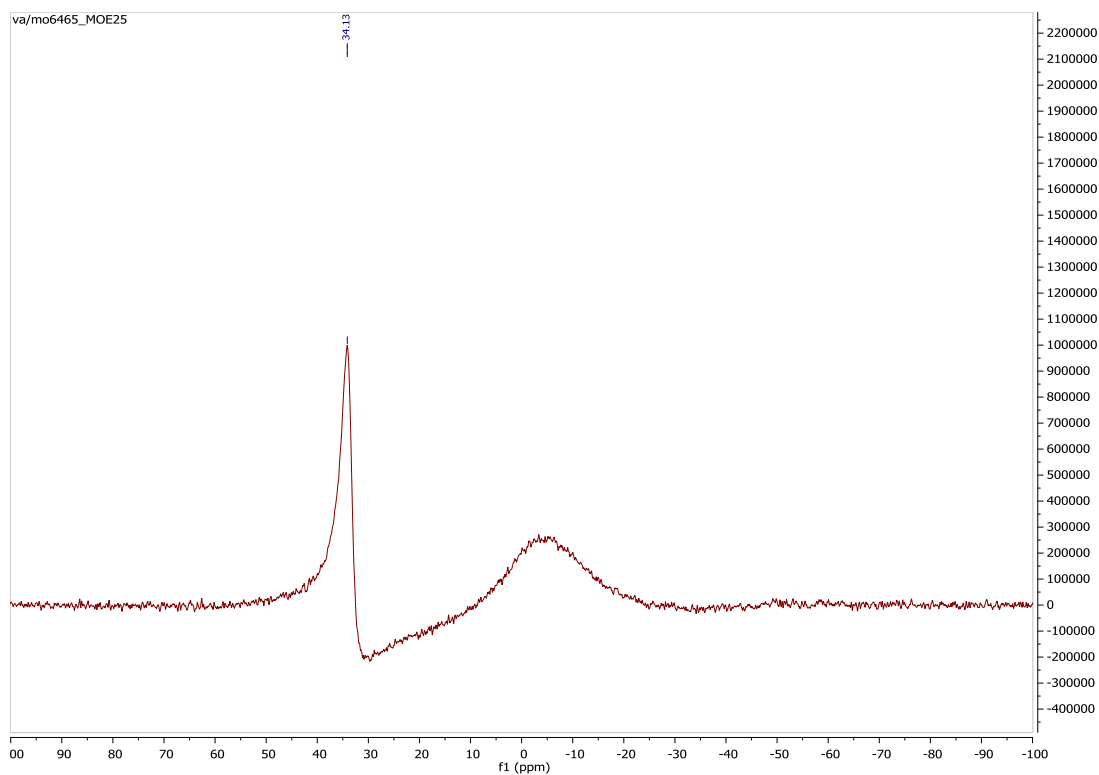

## 1f-oxidised

### $^1\text{H}$ -NMR (400 MHz, $\text{CDCl}_3$ )

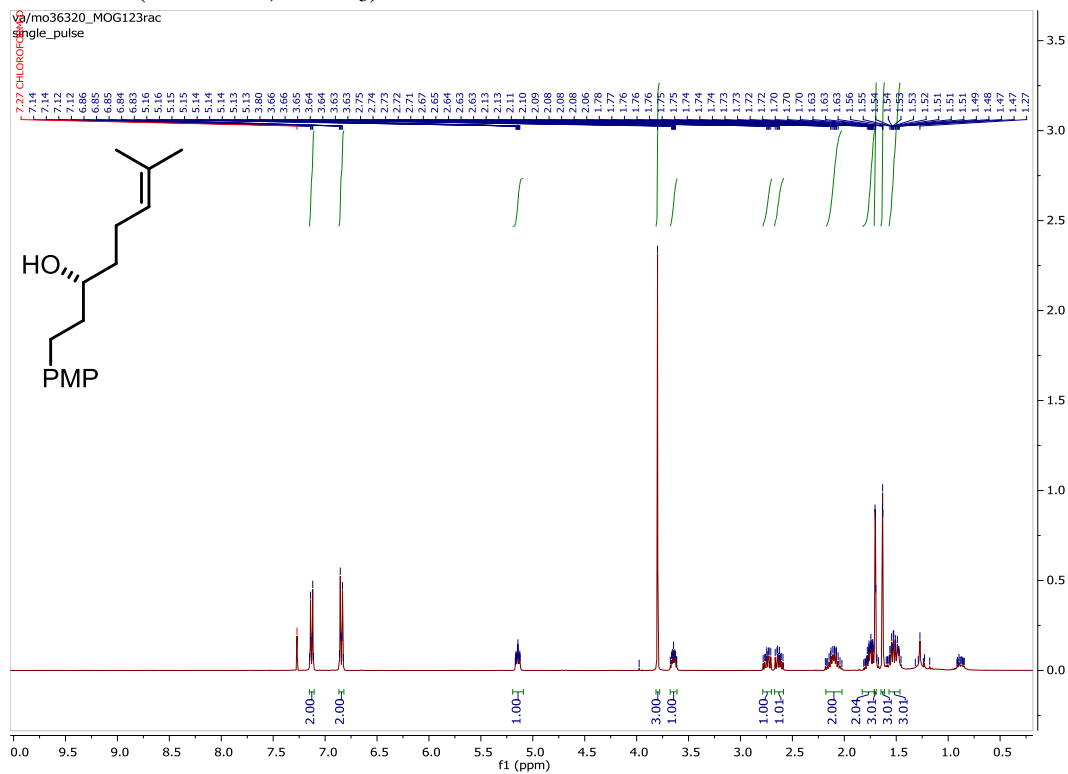

<sup>1</sup> The broad peak at -5 ppm is due to the use of standard NMR tube (contains borosilicates).

# $^{13}\text{C}$ -NMR (100 MHz, $\text{CDCl}_3$ )

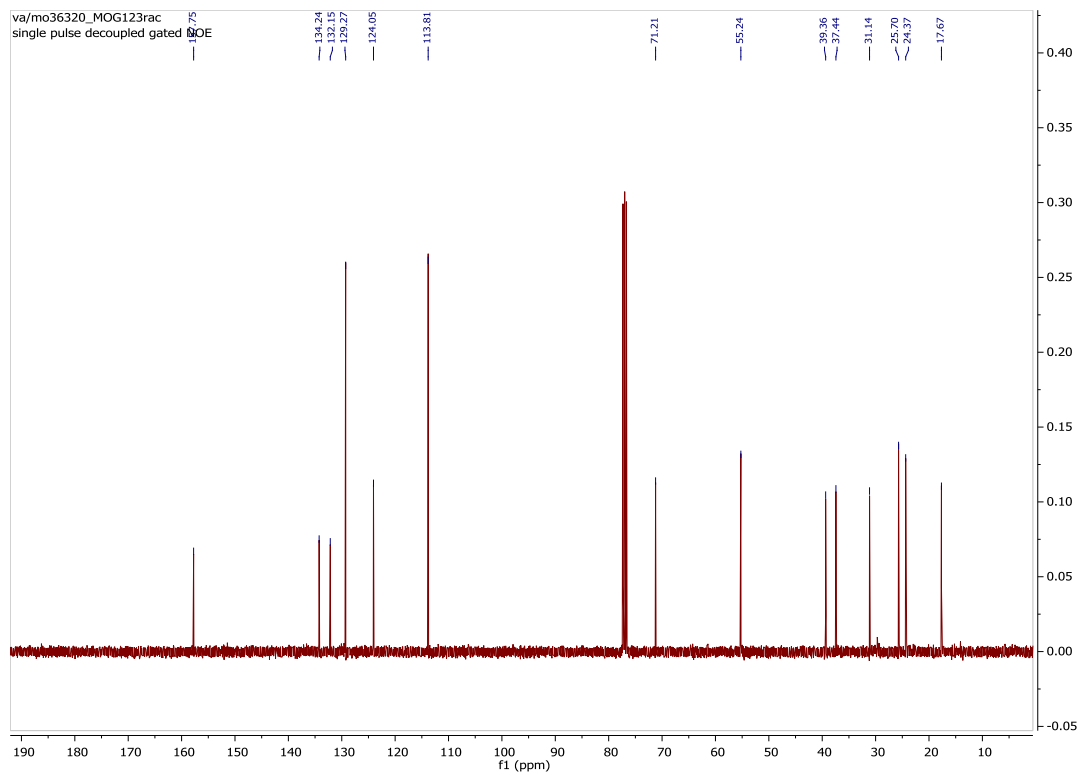

## Chiral SFC traces: racemic

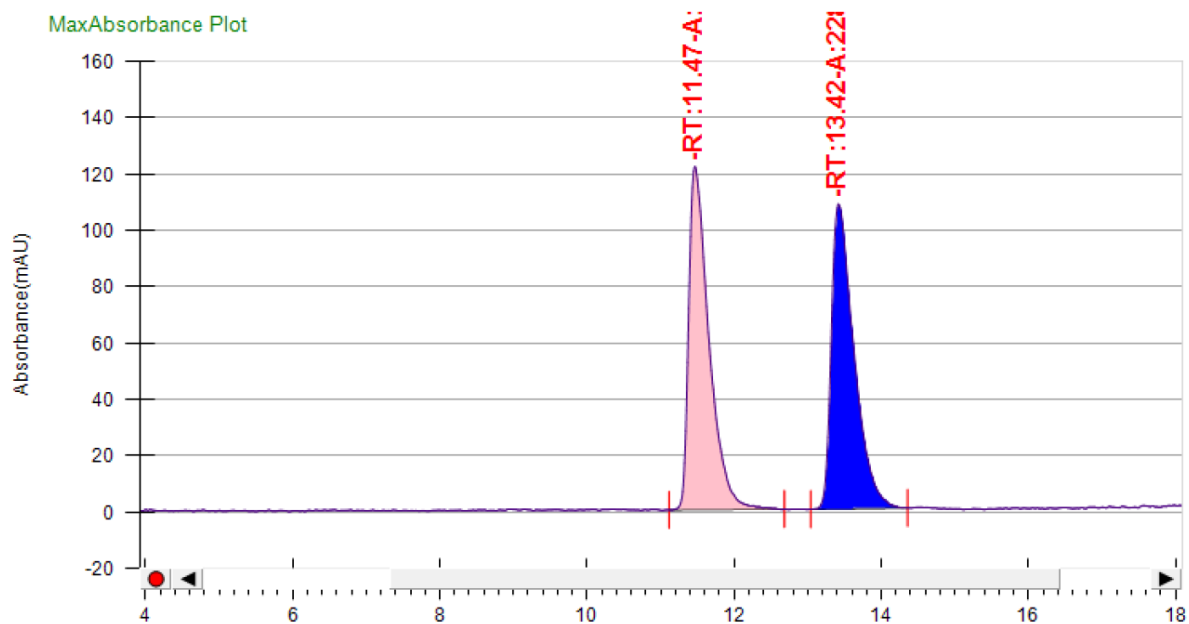

## Chiral SFC traces: enantioenriched

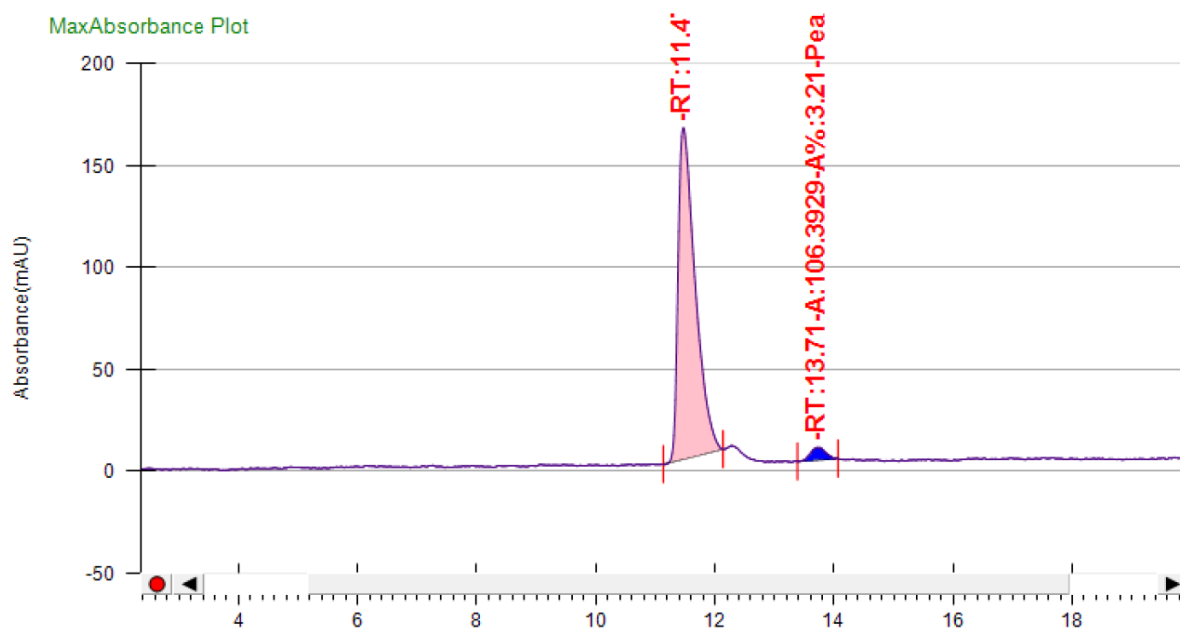

## Chiral SFC traces: racemic + enantioenriched

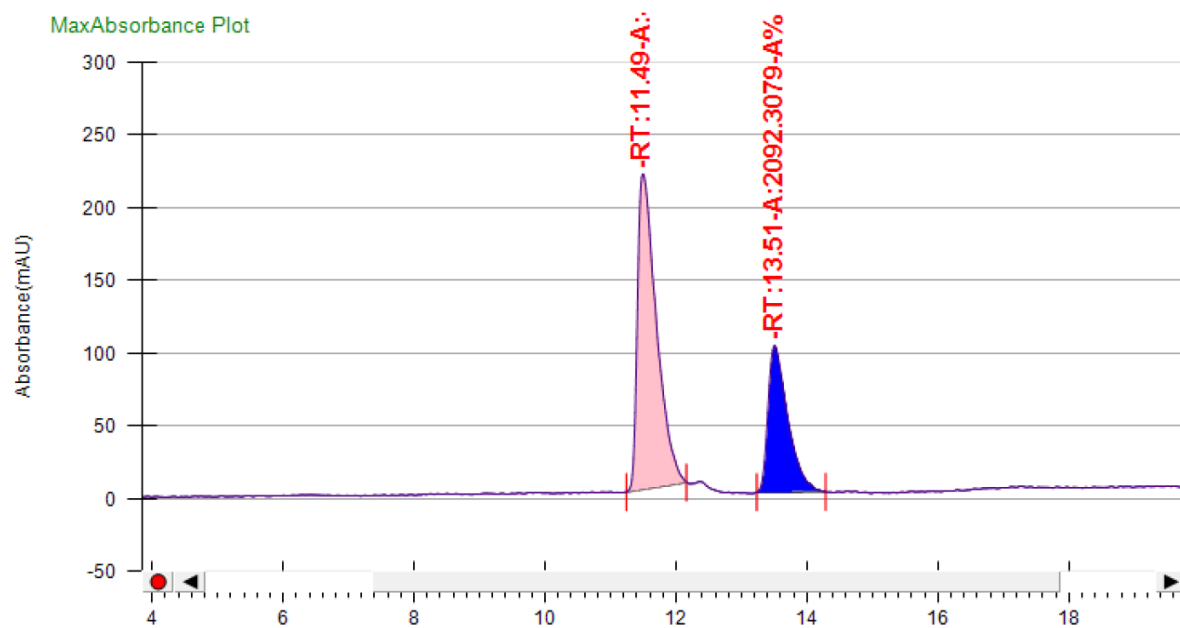



$^{11}\text{B}$  NMR (96 MHz,  $\text{CDCl}_3$ )<sup>2</sup>

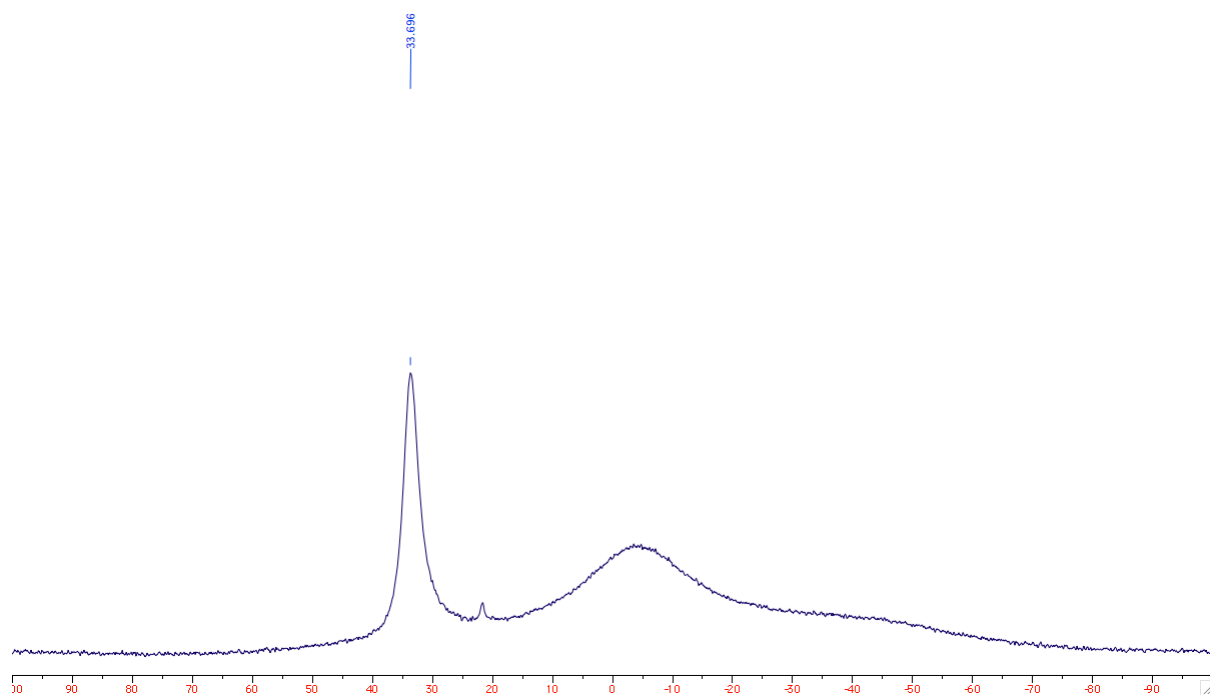

<sup>2</sup> The broad peak at -5 ppm is due to the use of standard NMR tube (contains borosilicates).

**1n**

$^1\text{H}$  NMR (400 MHz,  $\text{CDCl}_3$ )

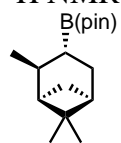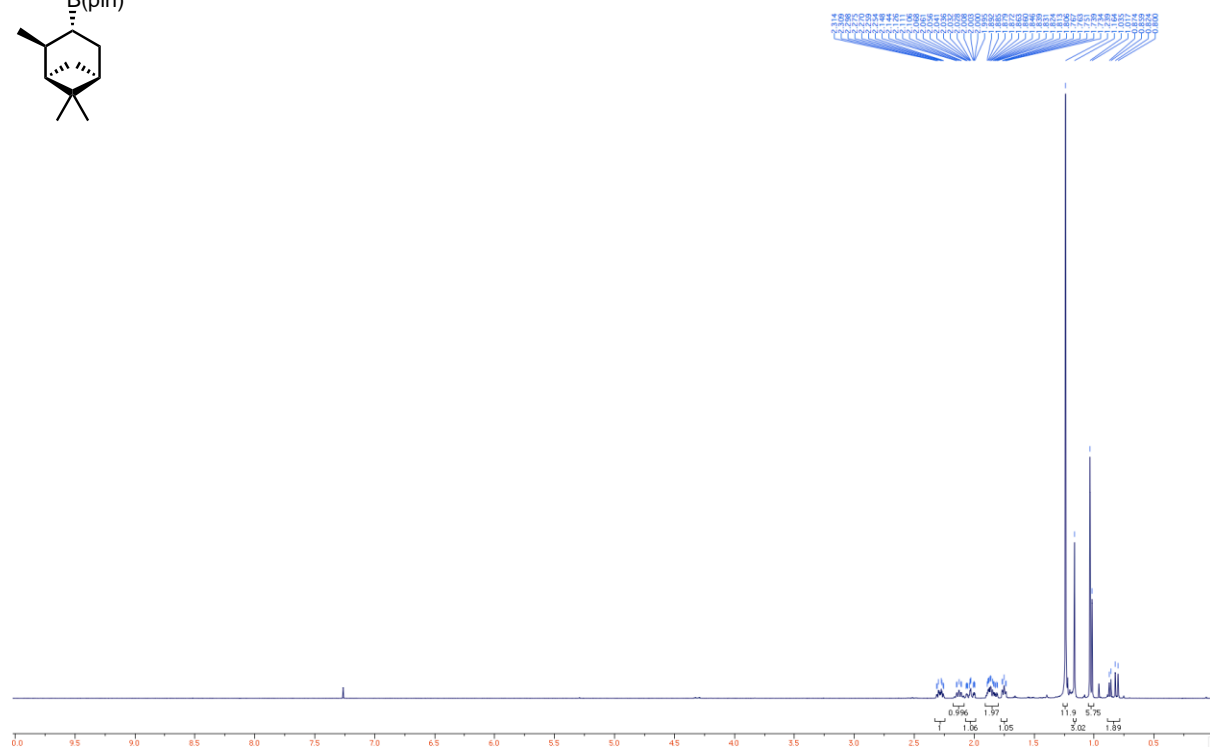

$^{13}\text{C}$  NMR (100 MHz,  $\text{CDCl}_3$ )

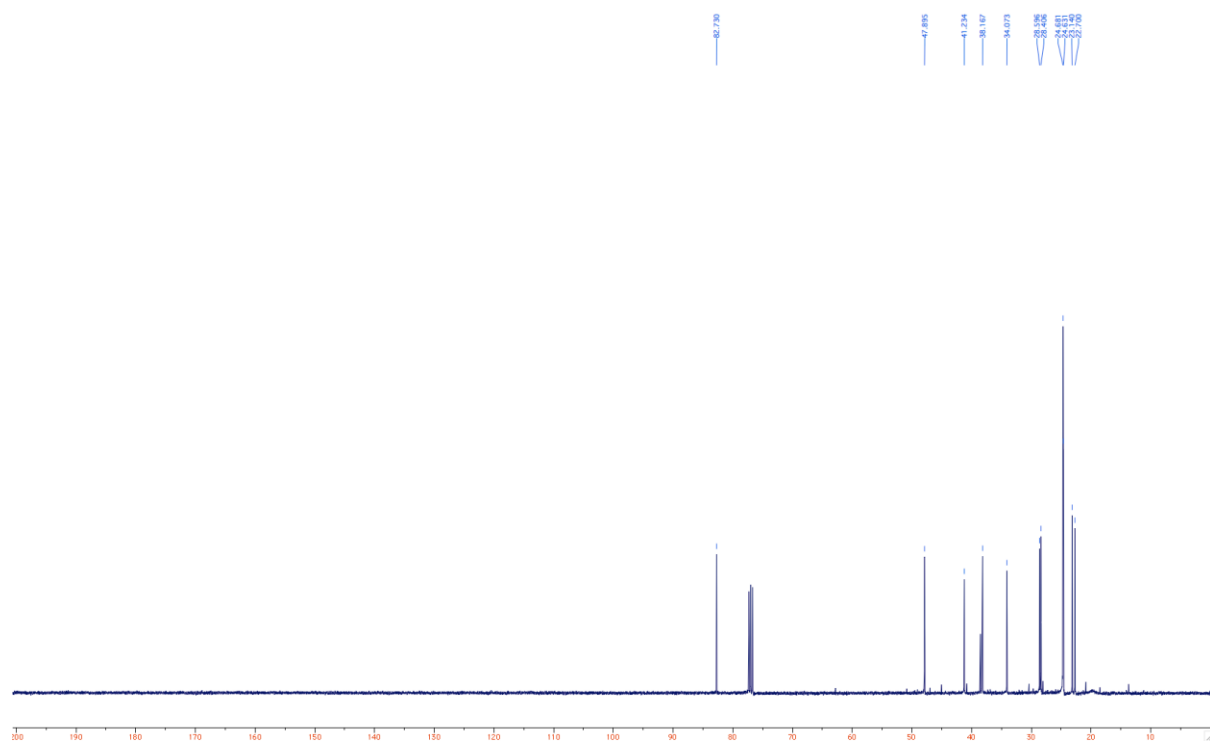



$^{11}\text{B}$  NMR (96 MHz,  $\text{CDCl}_3$ )<sup>3</sup>

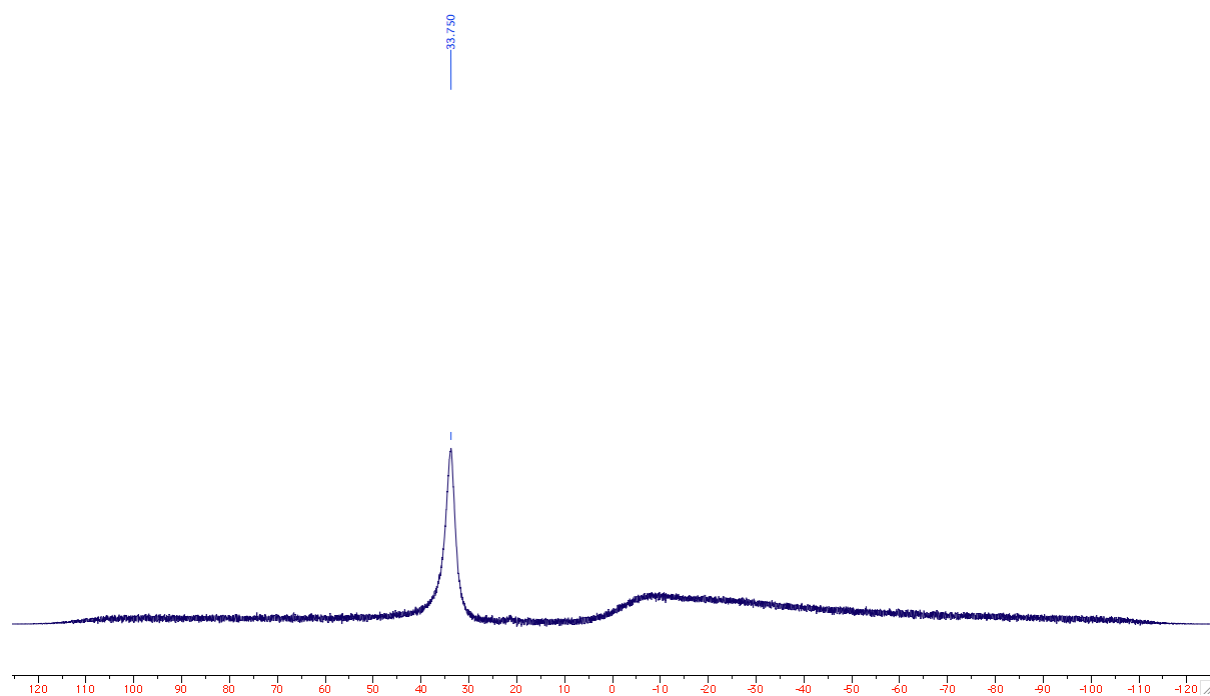

<sup>3</sup> The broad peak at -5 ppm is due to the use of standard NMR tube (contains borosilicates).

**1r**

<sup>1</sup>H NMR (400 MHz, CDCl<sub>3</sub>)

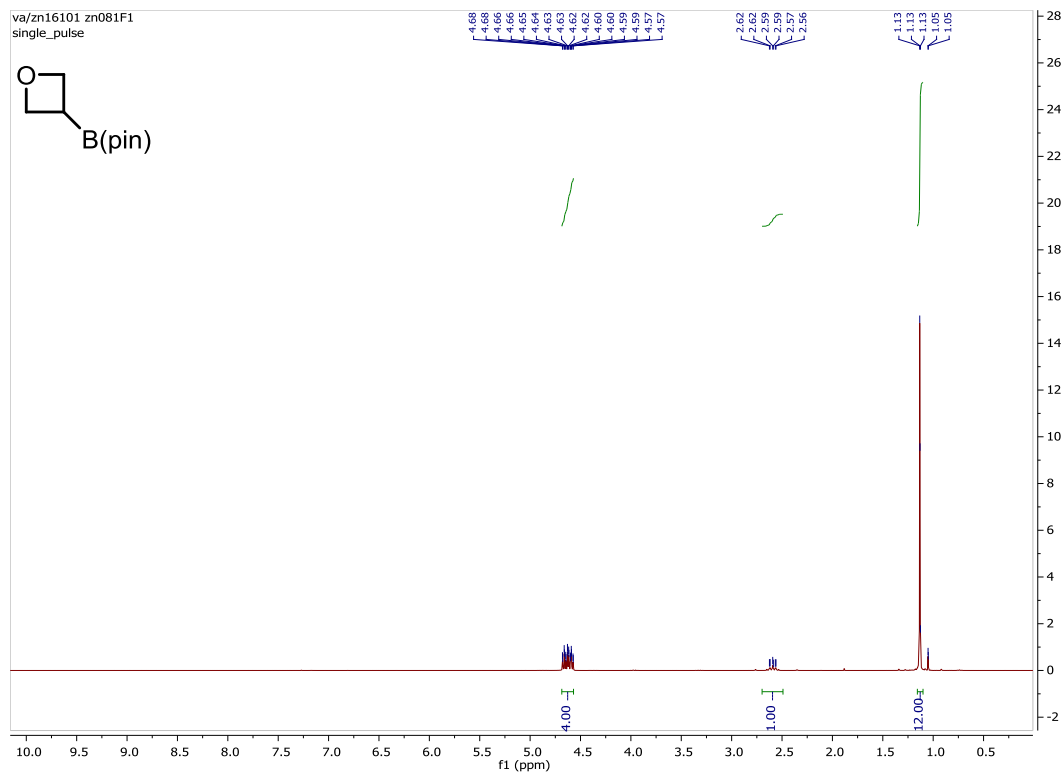

<sup>13</sup>C NMR (100 MHz, CDCl<sub>3</sub>)

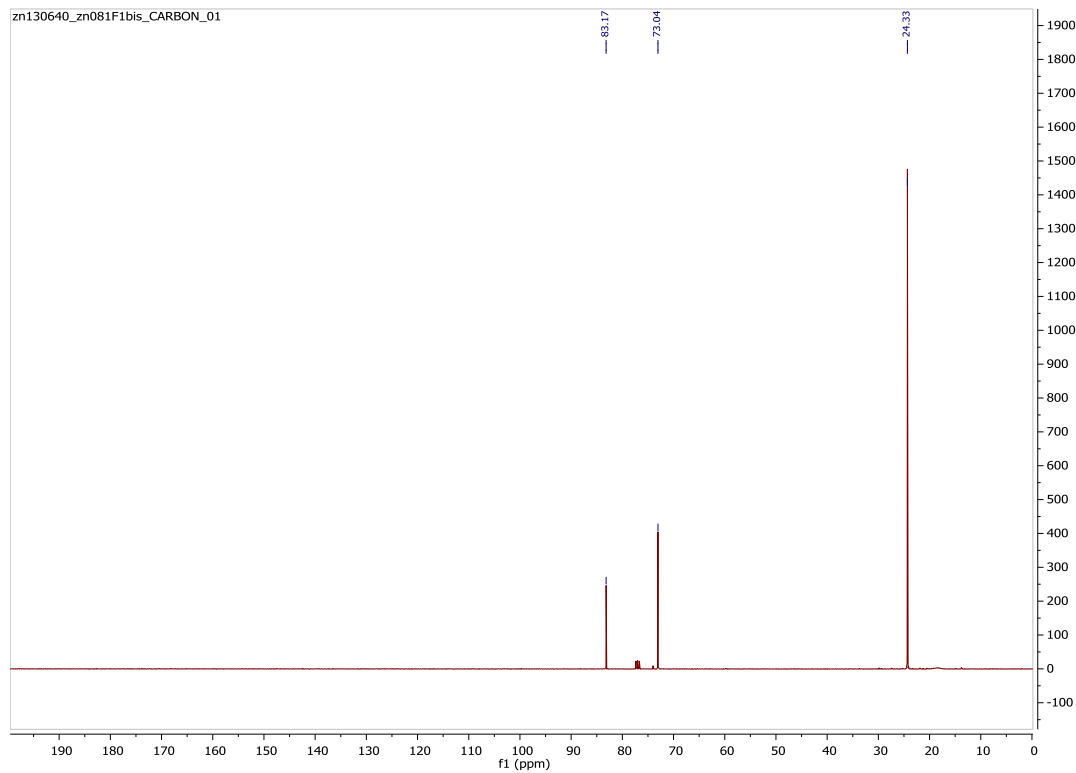

$^{11}\text{B}$  NMR (96 MHz, NONE)

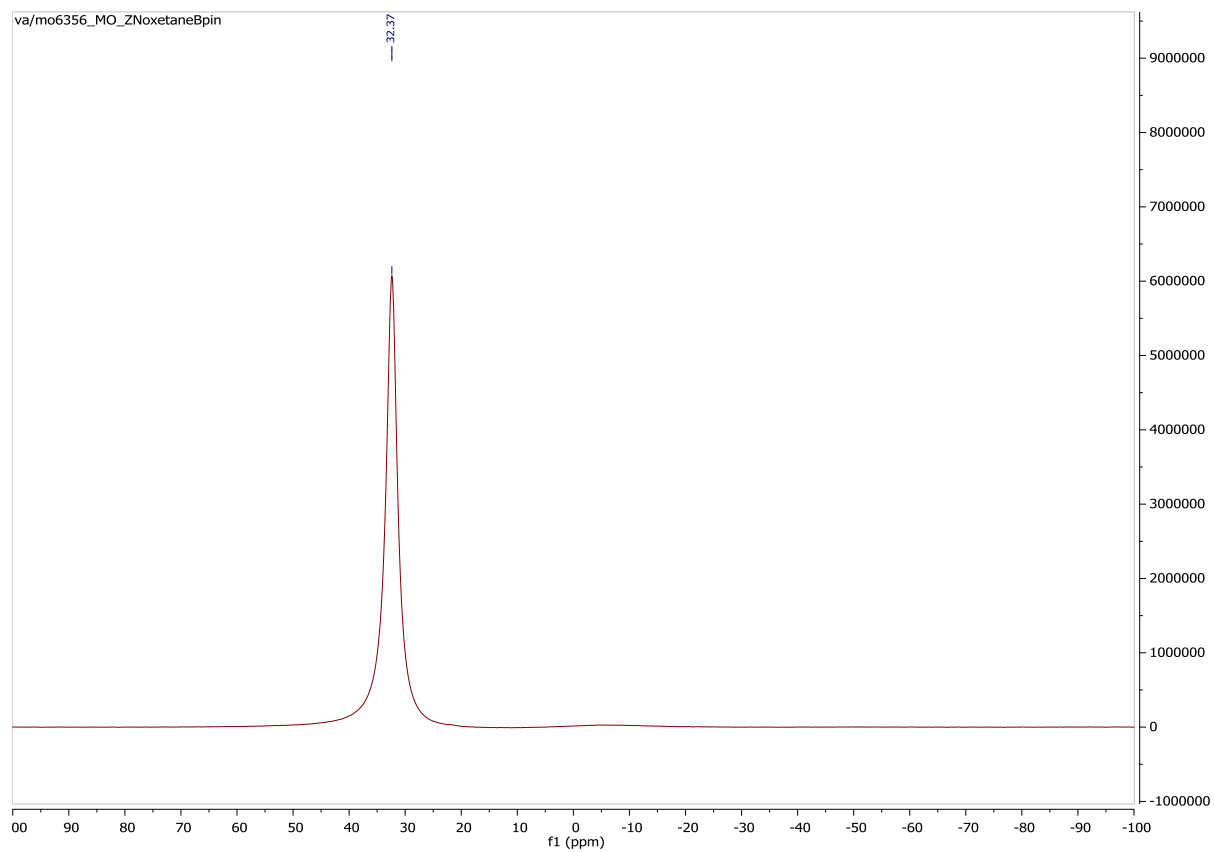

1o

$^1\text{H}$  NMR (400 MHz,  $\text{CDCl}_3$ )

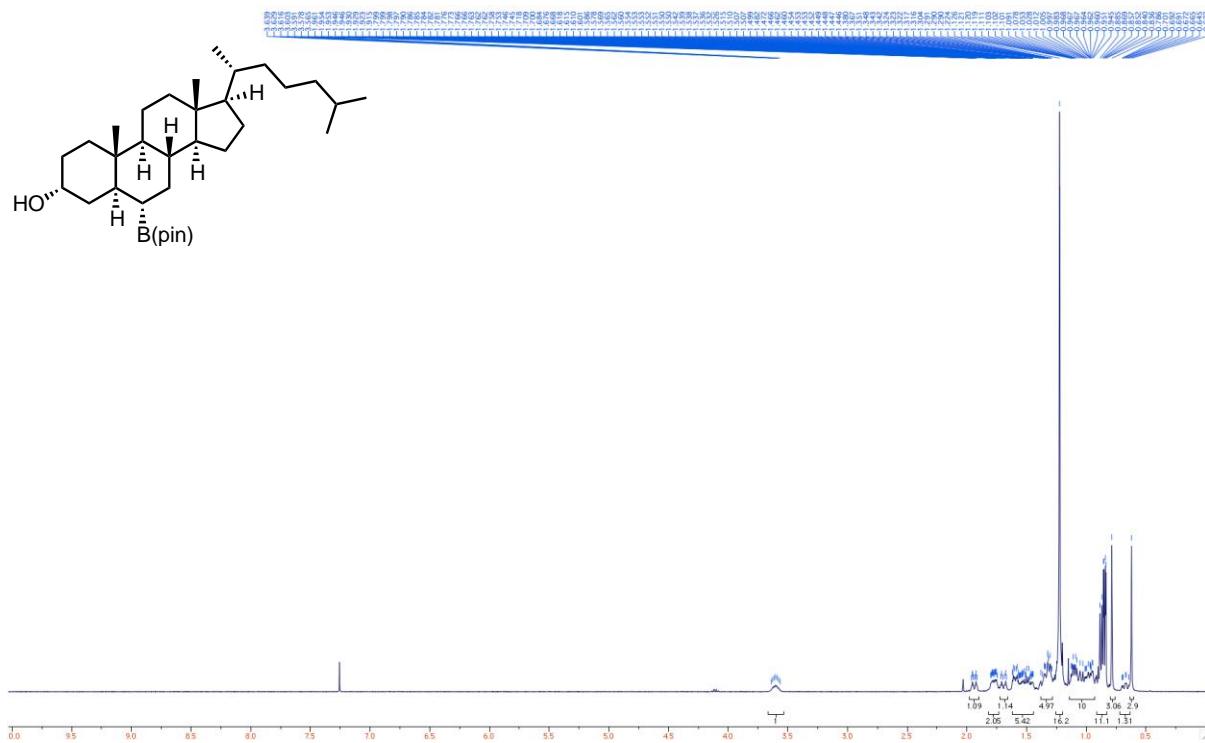

$^{13}\text{C}$  NMR (100 MHz,  $\text{CDCl}_3$ )

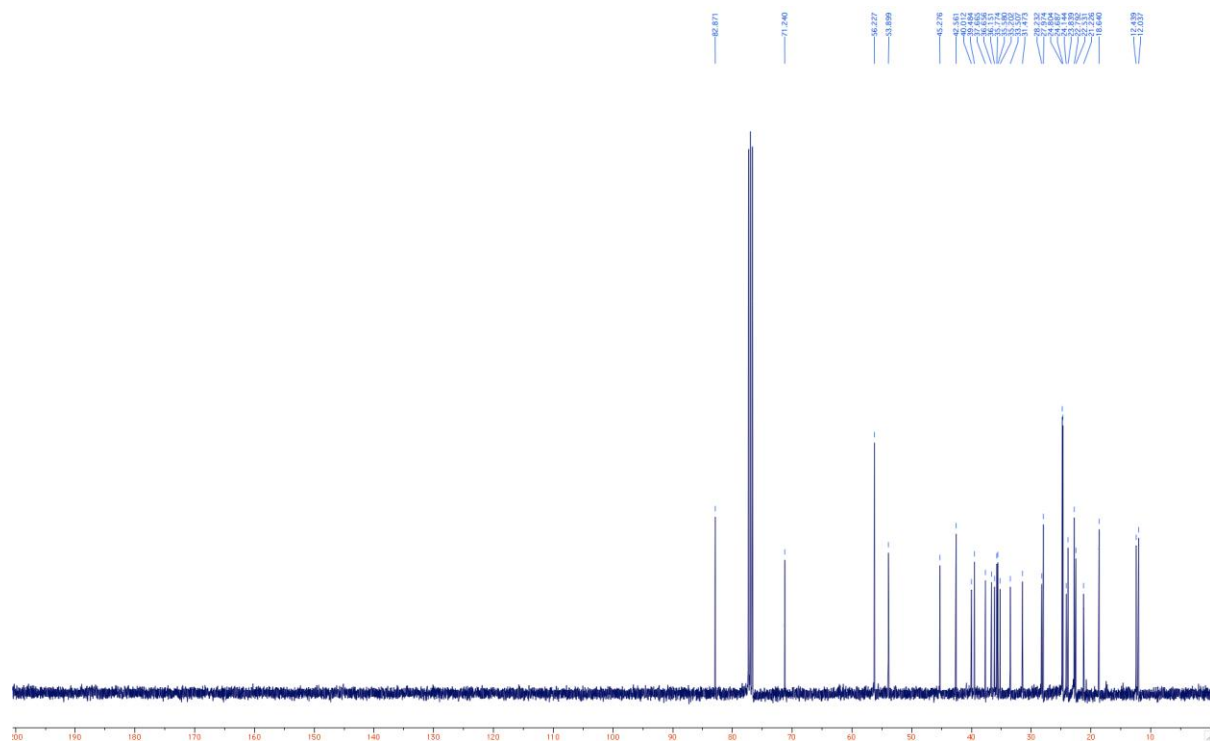

$^{11}\text{B}$  NMR (96 MHz,  $\text{CDCl}_3$ )<sup>4</sup>

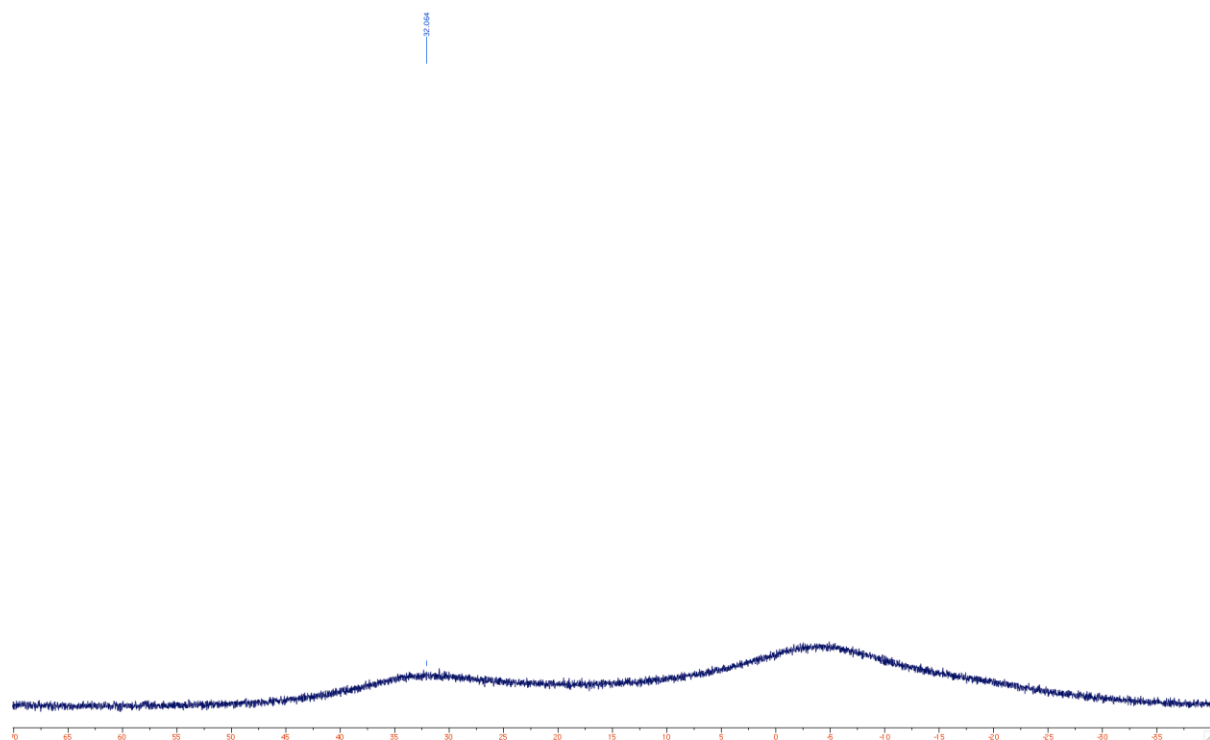

<sup>4</sup> The broad peak at -5 ppm is due to the use of standard NMR tube (contains borosilicates).

**1p**

$^1\text{H}$  NMR (400 MHz,  $\text{CDCl}_3$ )

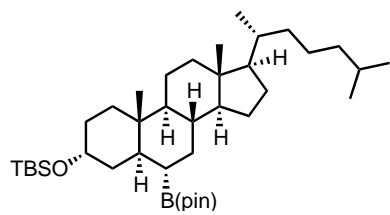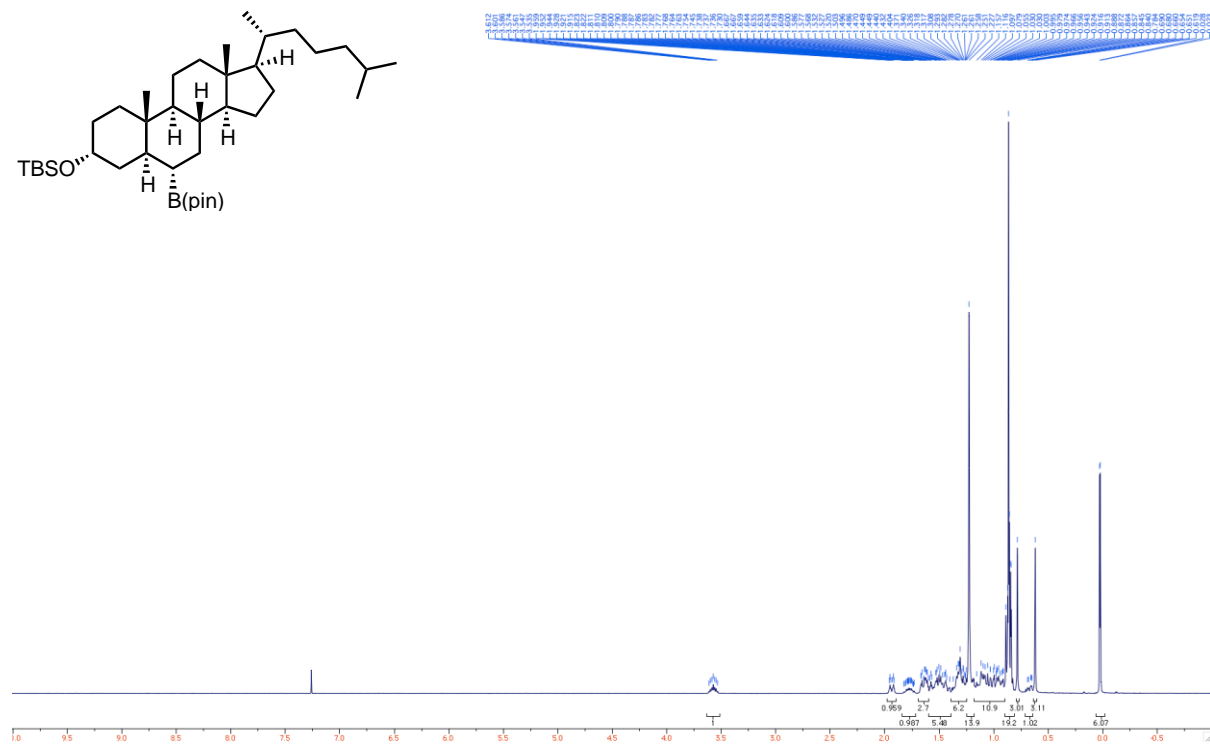

$^{13}\text{C}$  NMR (100 MHz,  $\text{CDCl}_3$ )

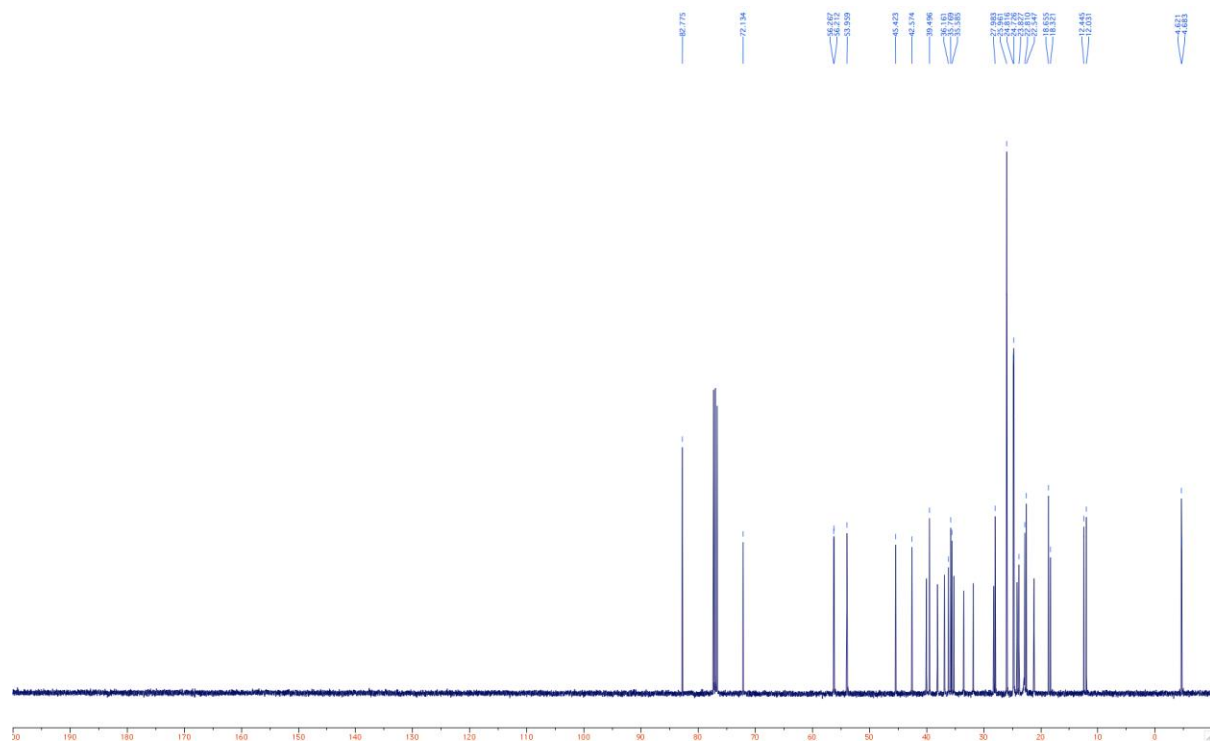

$^{11}\text{B}$  NMR (96Mhz,  $\text{CDCl}_3$ )<sup>5</sup>

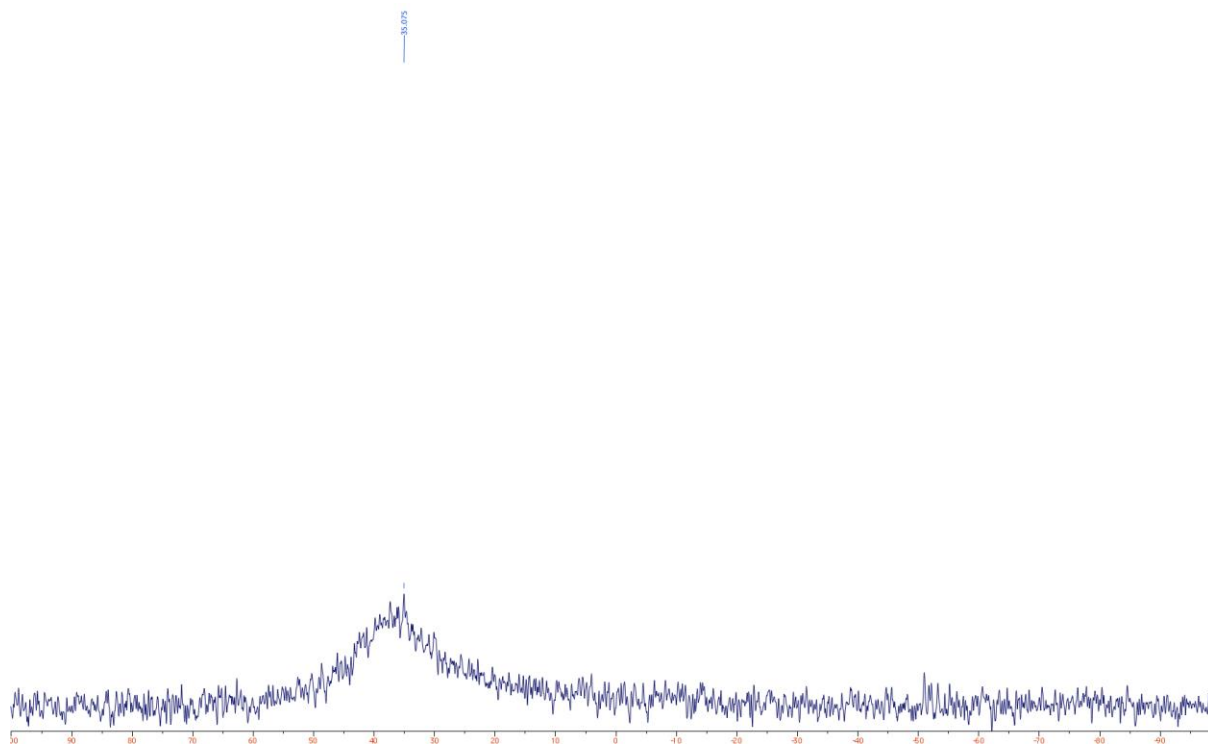

---

<sup>5</sup> The  $^{11}\text{B}$  NMR of steroid **1o** is believed to be weak due to possible aggregation effects.

1j

$^1\text{H}$  NMR (400 MHz,  $\text{CDCl}_3$ )

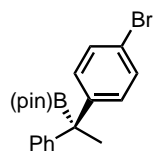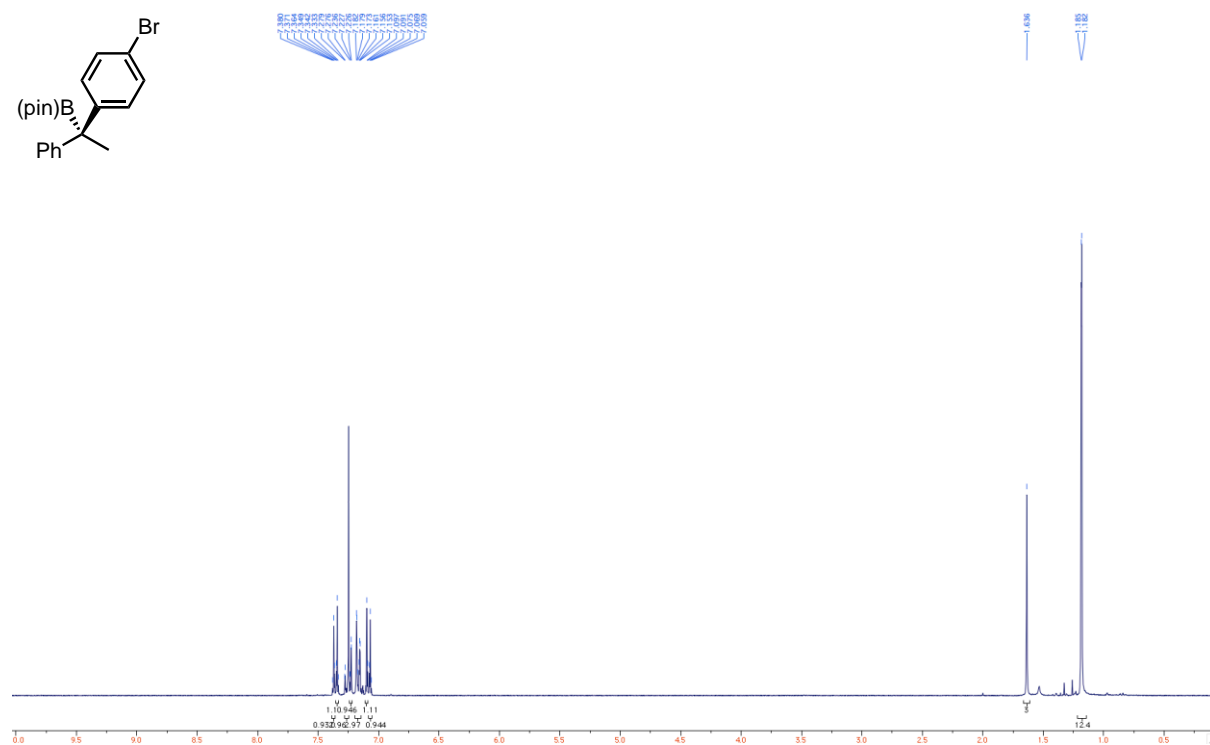

$^{13}\text{C}$  NMR (100 MHz,  $\text{CDCl}_3$ )

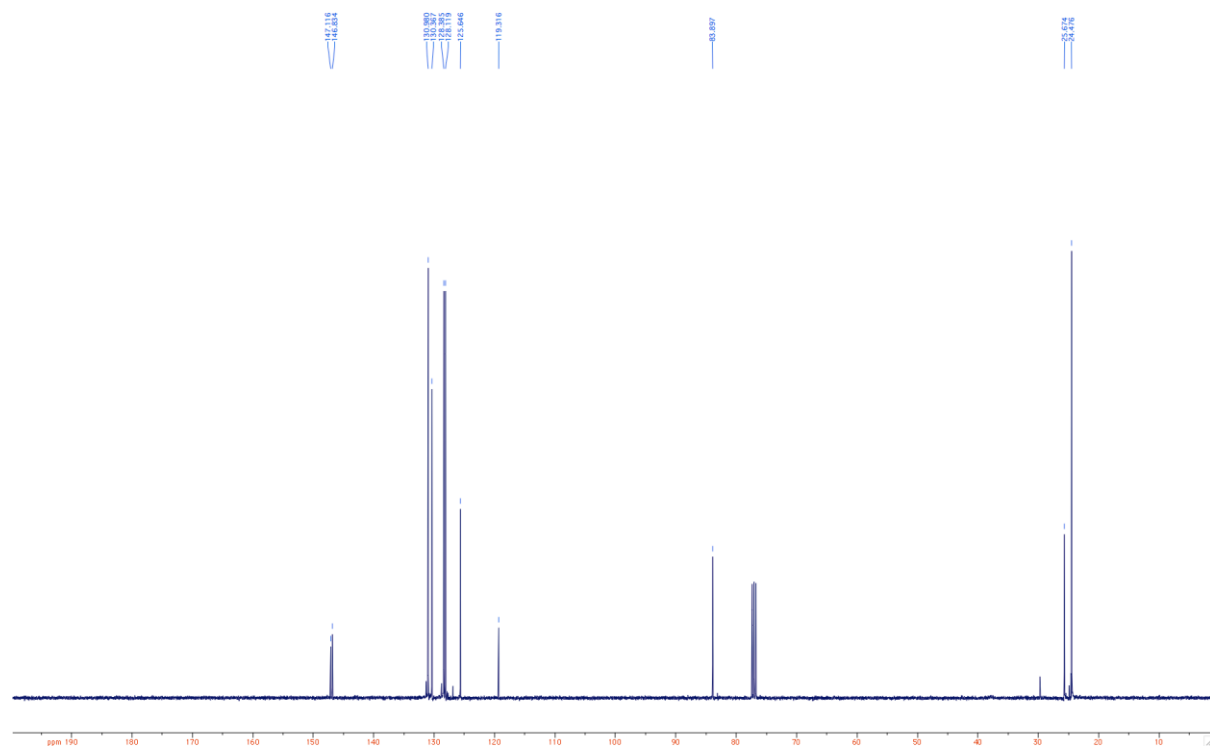



$^{11}\text{B}$  NMR (96 MHz,  $\text{CDCl}_3$ )

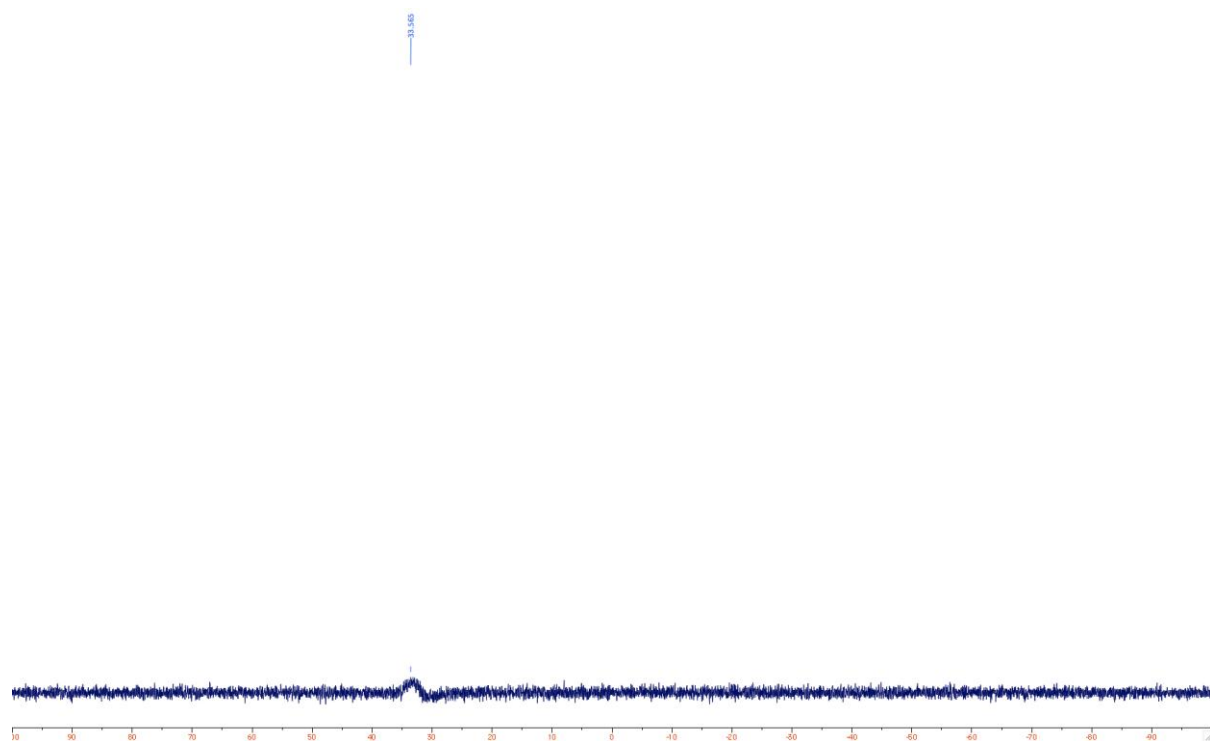

**1k**

<sup>1</sup>H NMR (400 MHz, CDCl<sub>3</sub>)

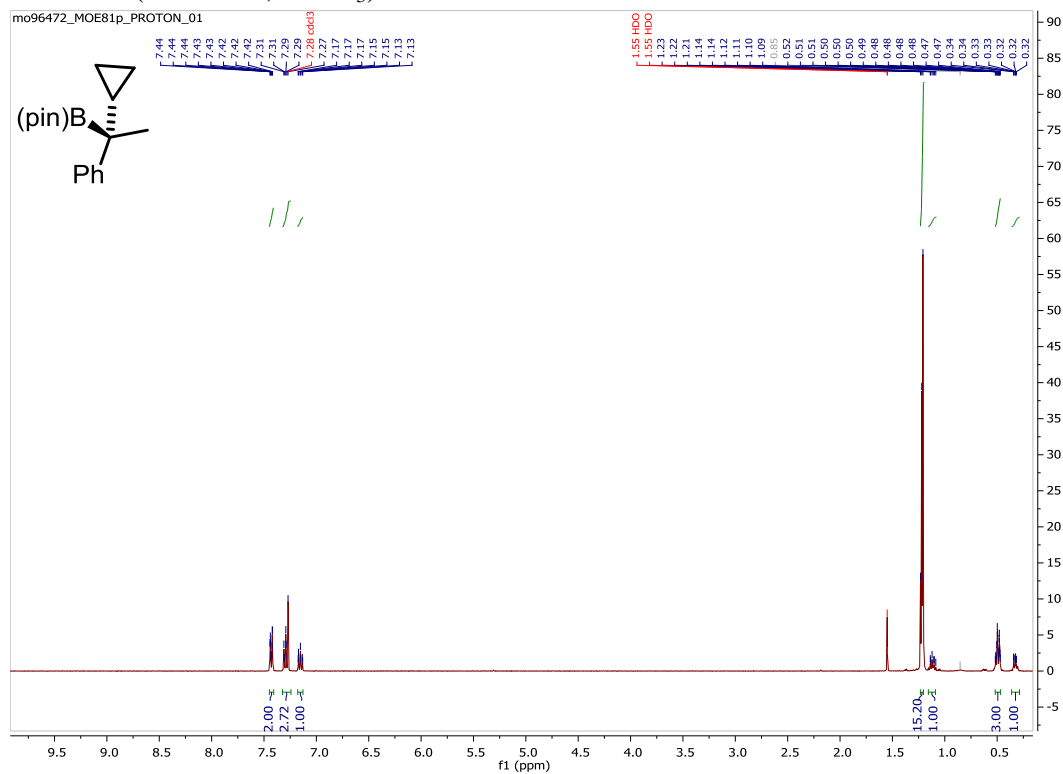

<sup>13</sup>C NMR (100 MHz, CDCl<sub>3</sub>)

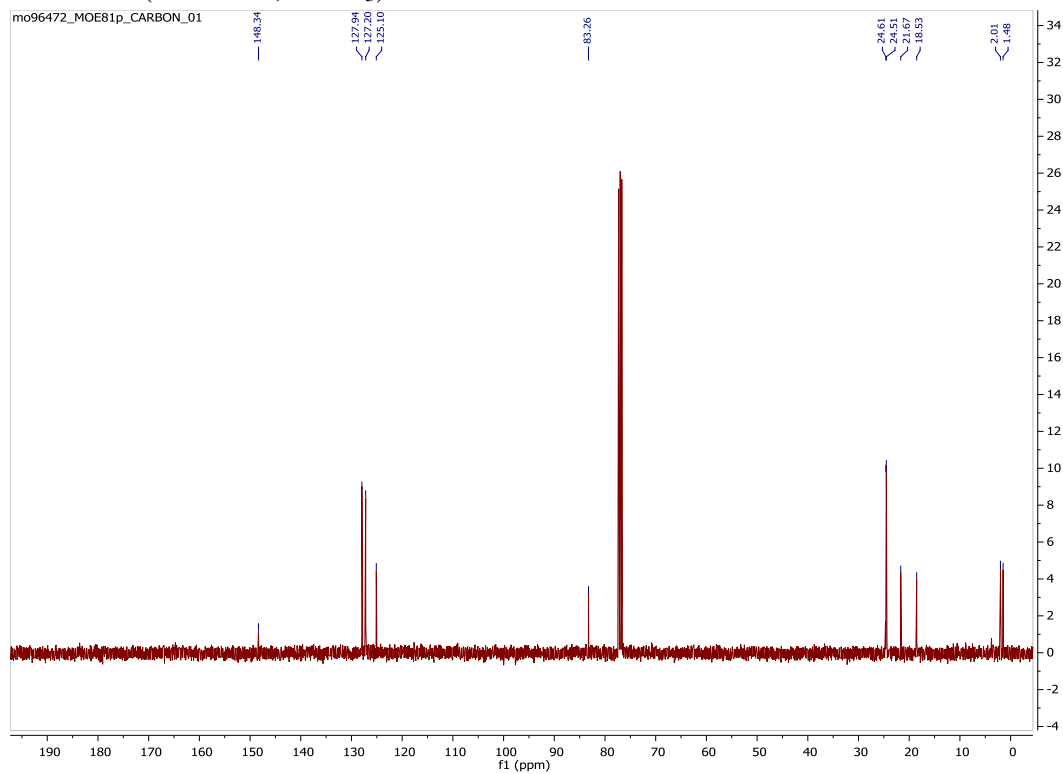

$^{11}\text{B}$  NMR (96 MHz, NONE)<sup>6</sup>

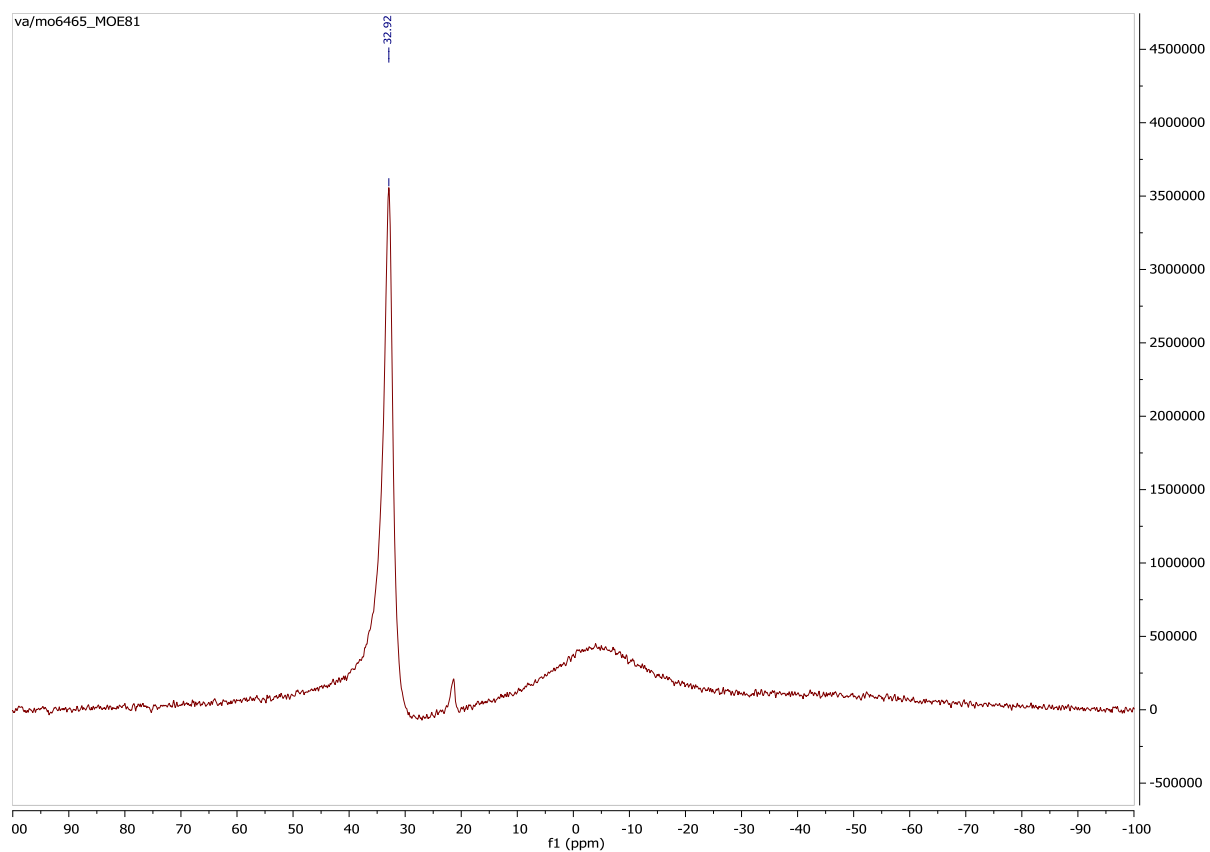

<sup>6</sup> The broad peak at -5 ppm is due to the use of standard NMR tube (contains borosilicates).

**2a**

$^1\text{H}$  NMR (400 MHz,  $\text{CDCl}_3$ )

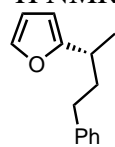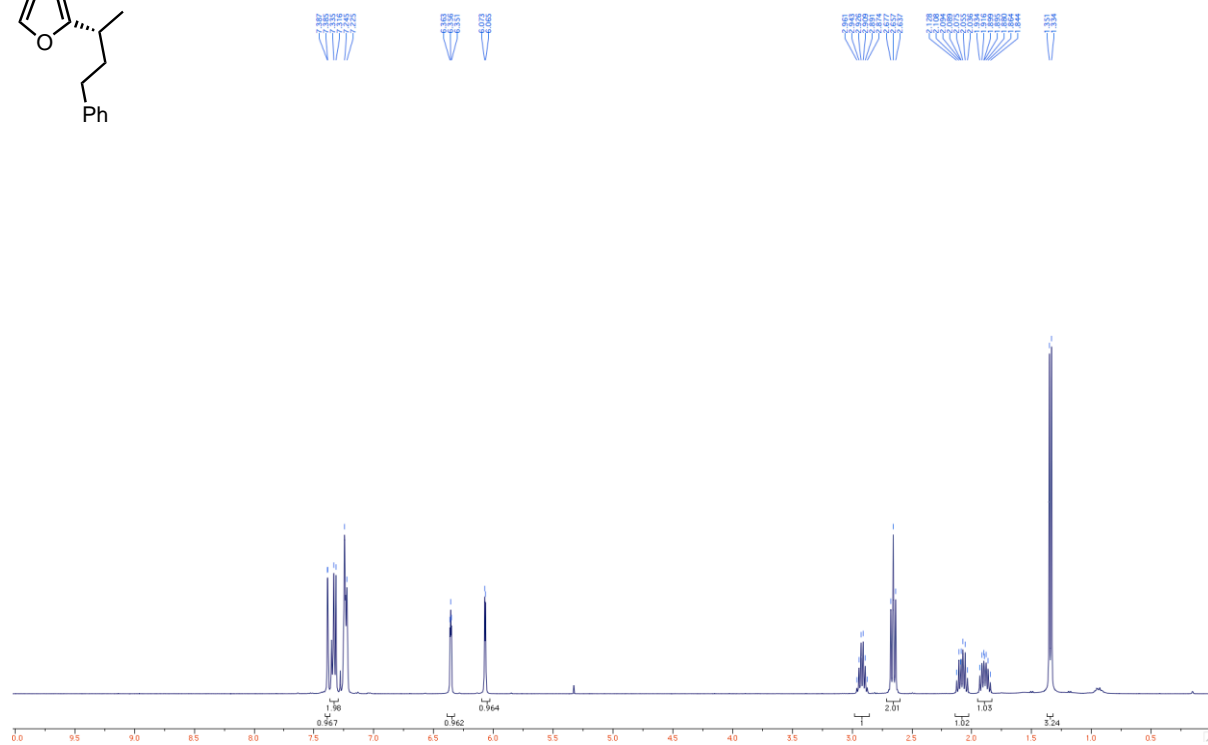

$^{13}\text{C}$  NMR (100 MHz,  $\text{CDCl}_3$ )

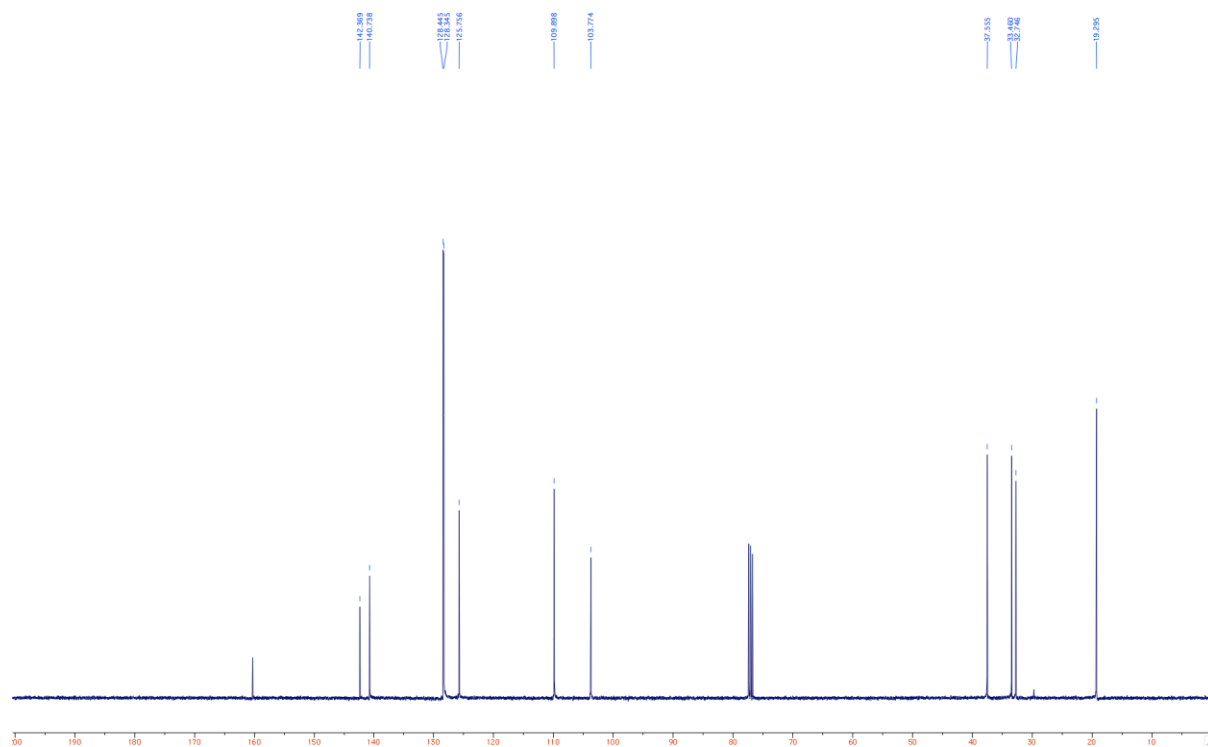

### Chiral HPLC traces: racemic

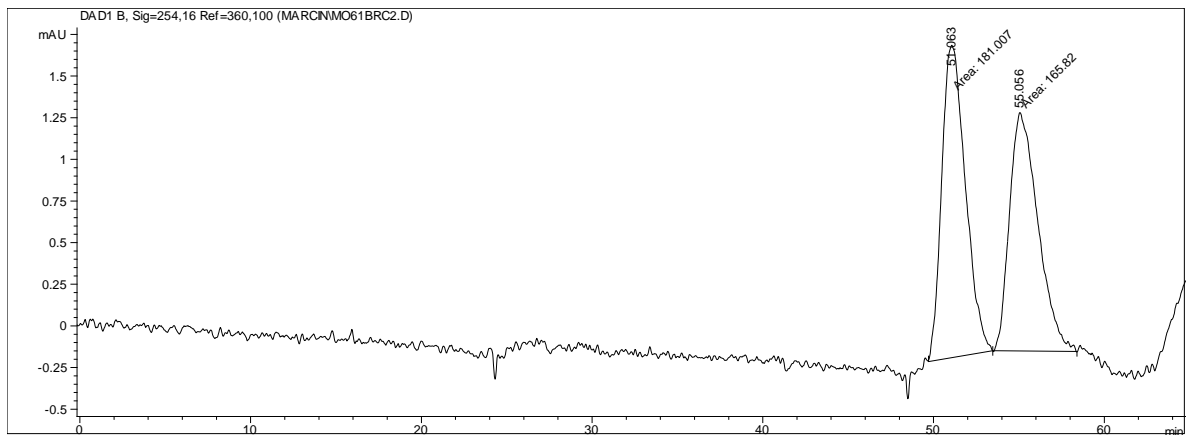

### Chiral HPLC traces: enantioenriched

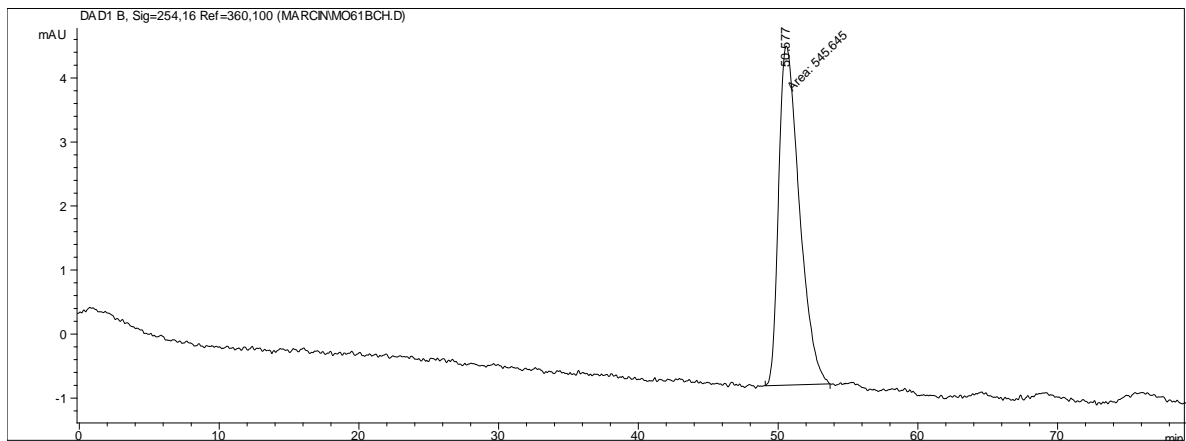

**2c**

$^1\text{H}$  NMR (400 MHz,  $\text{CDCl}_3$ )

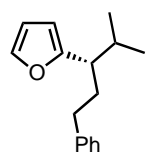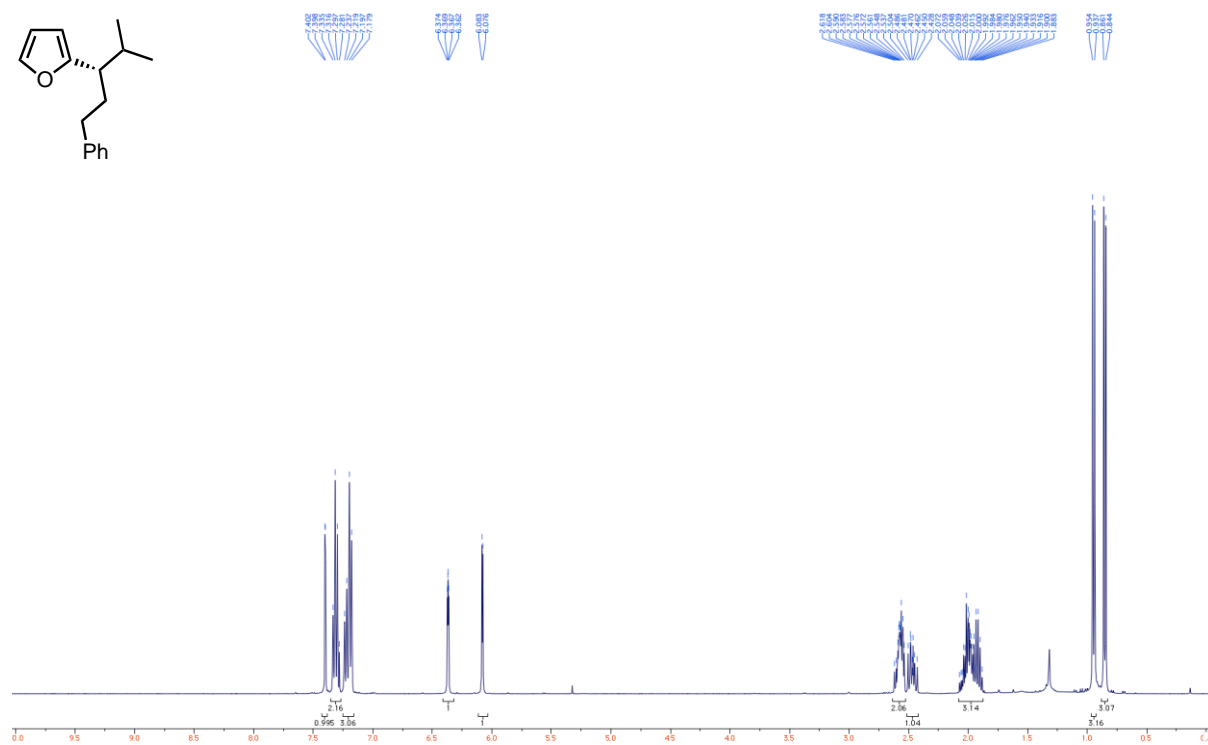

$^{13}\text{C}$  NMR (100 MHz,  $\text{CDCl}_3$ )

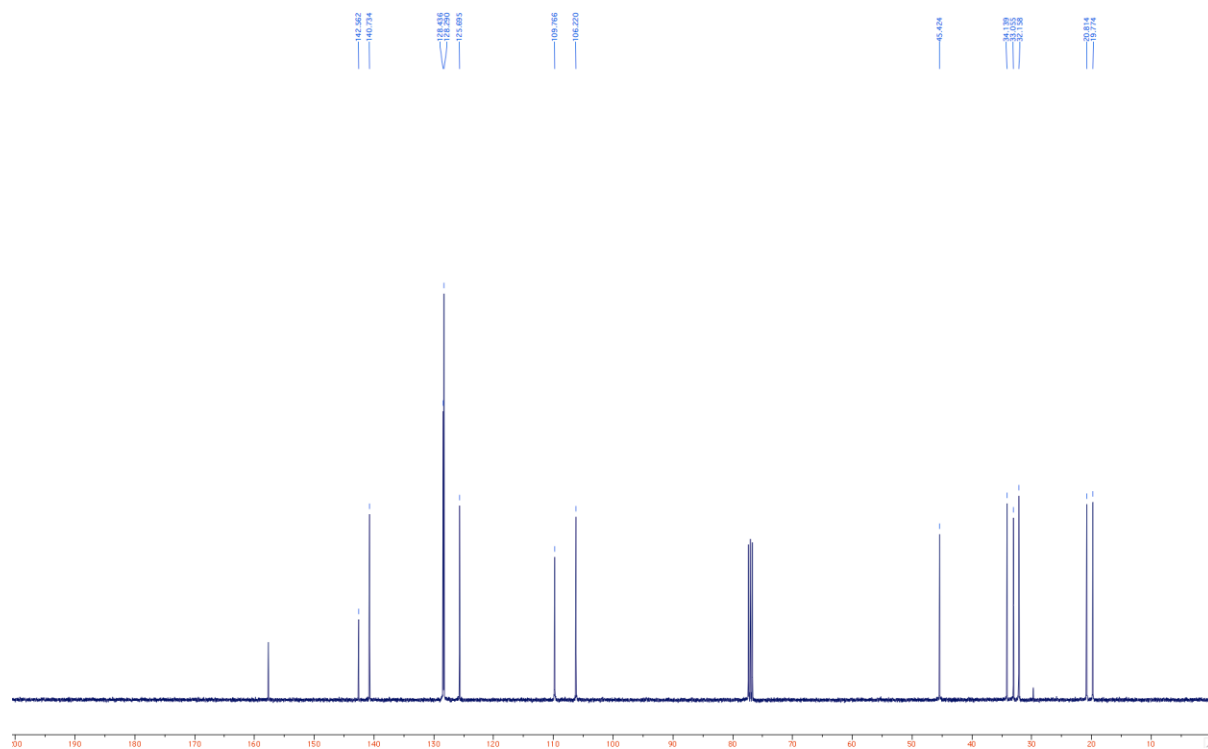

### Chiral GC traces: racemic

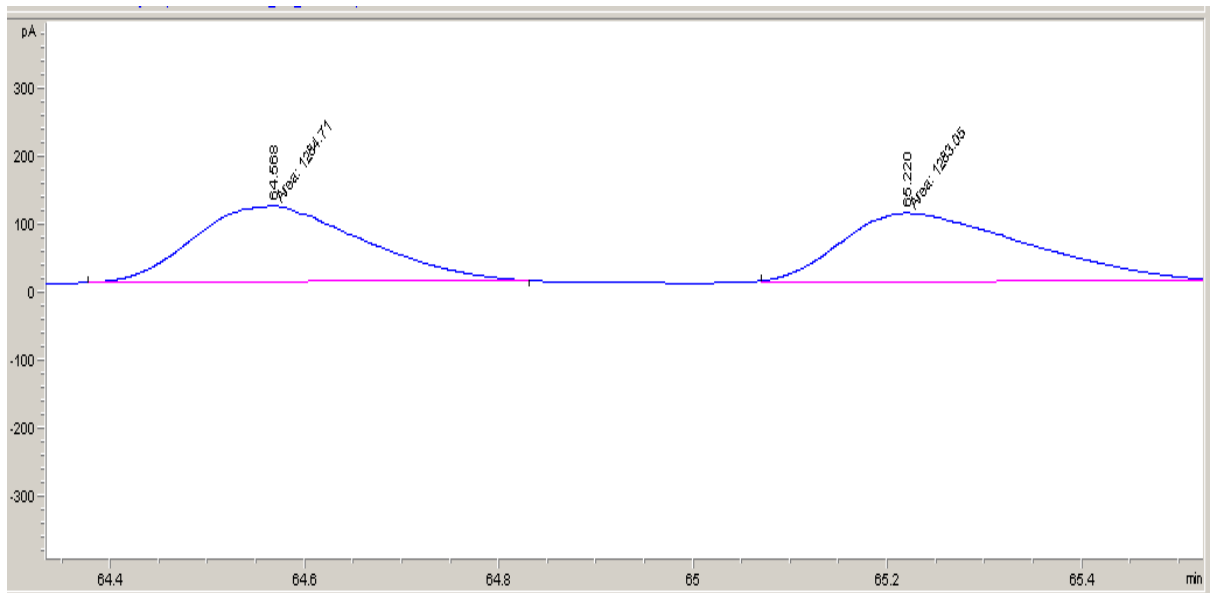

### Chiral GC traces: enantioenriched

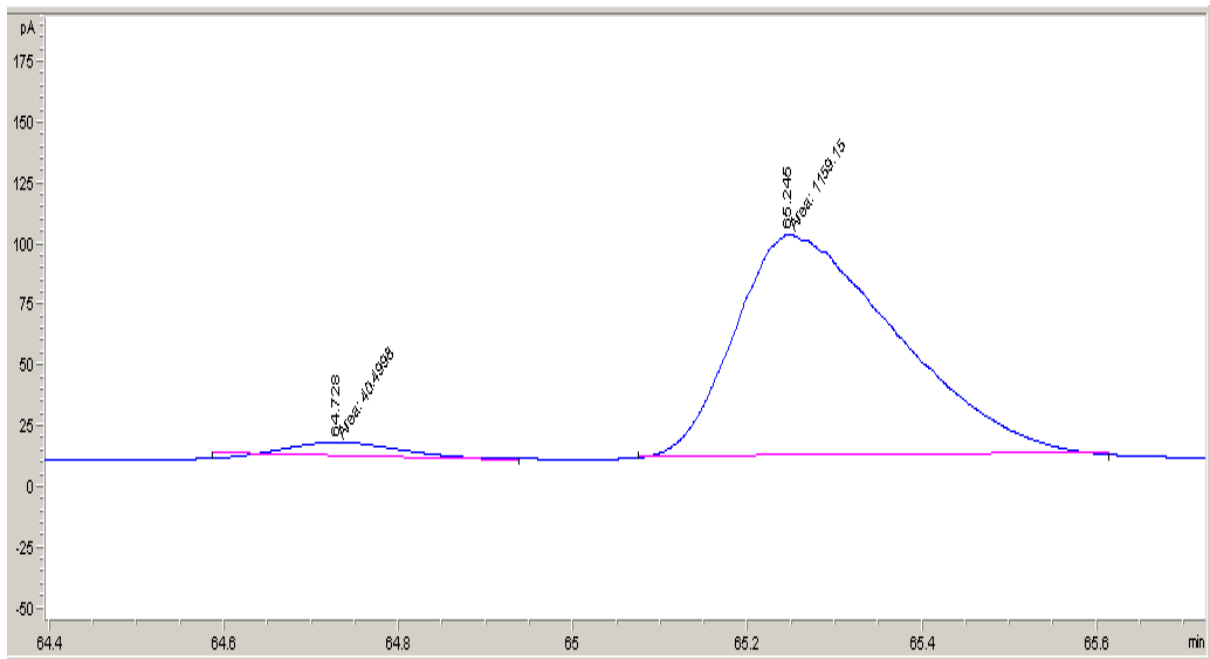

2e

$^1\text{H}$  NMR (400 MHz,  $\text{CDCl}_3$ )

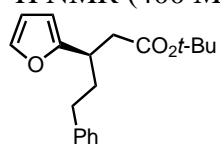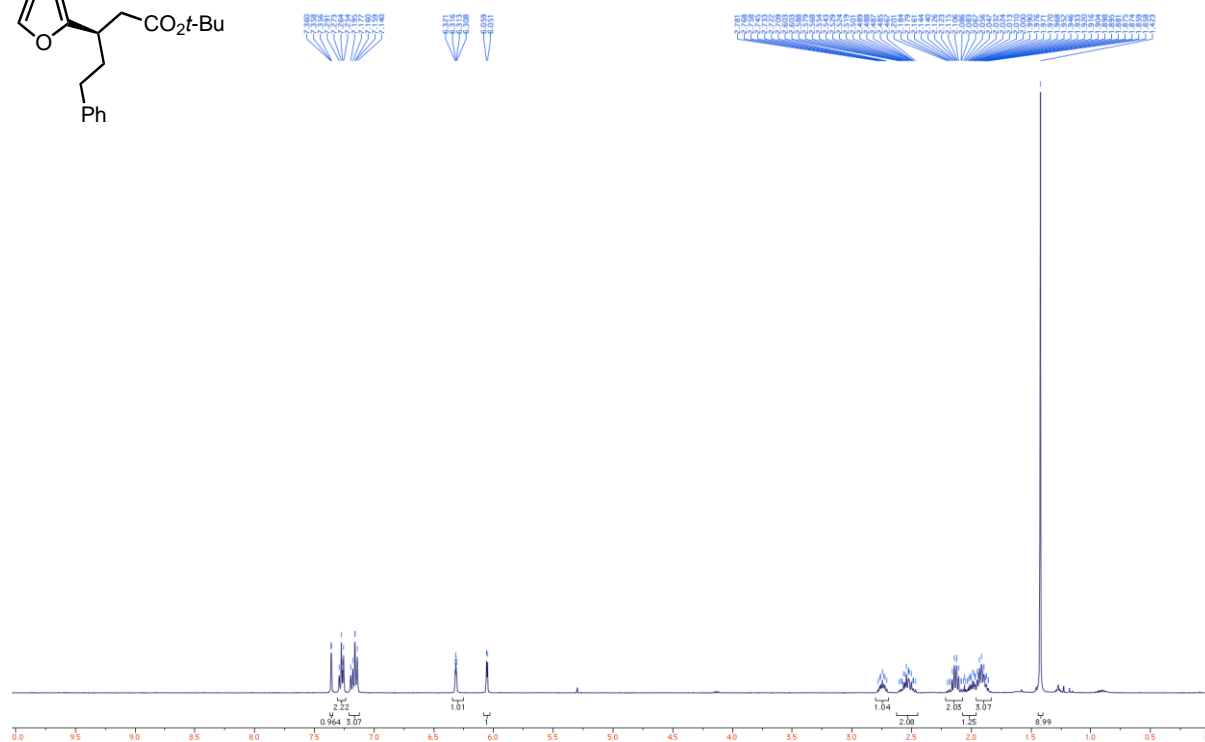

$^{13}\text{C}$  NMR (100 MHz,  $\text{CDCl}_3$ )

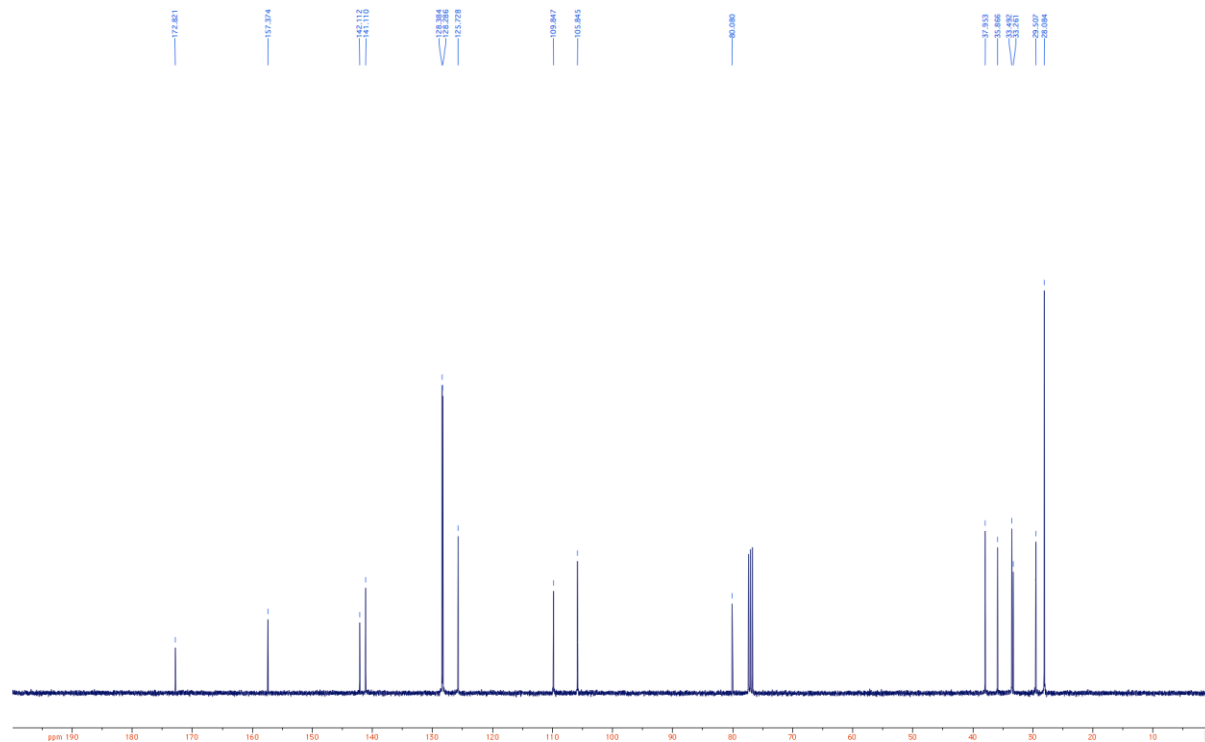



### Chiral HPLC traces: racemic

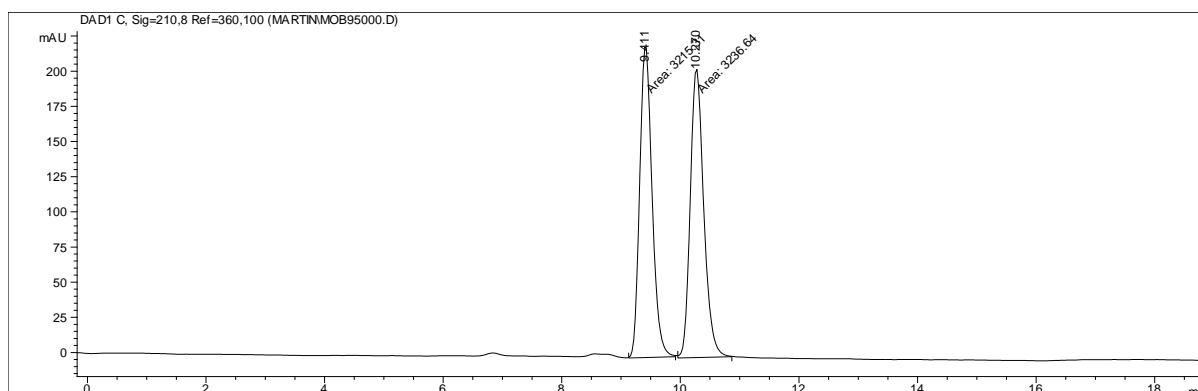

### Chiral HPLC traces: enantioenriched

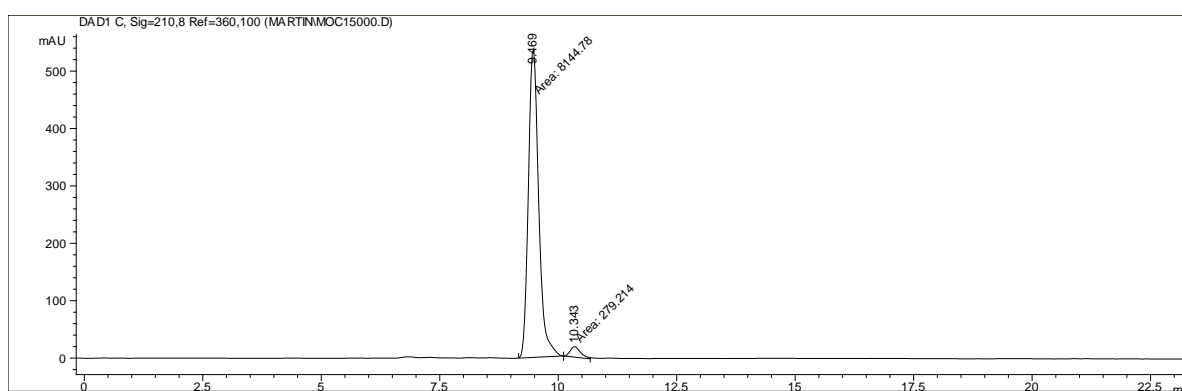



### Chiral HPLC traces: racemic

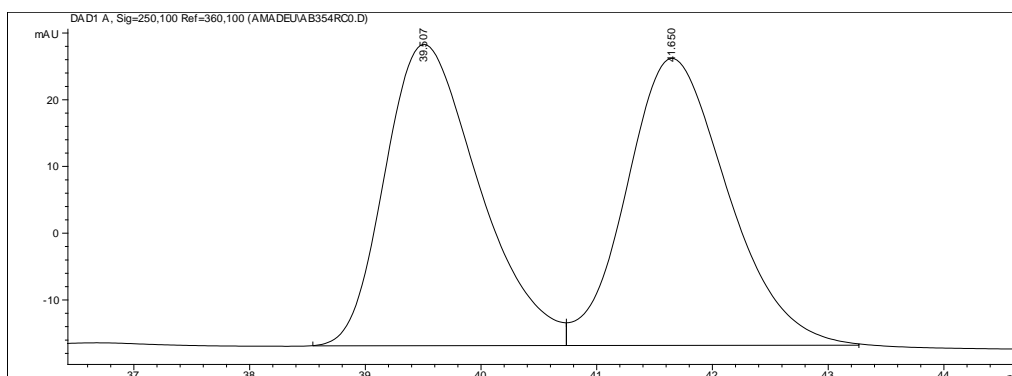

### Chiral HPLC traces: enantioenriched

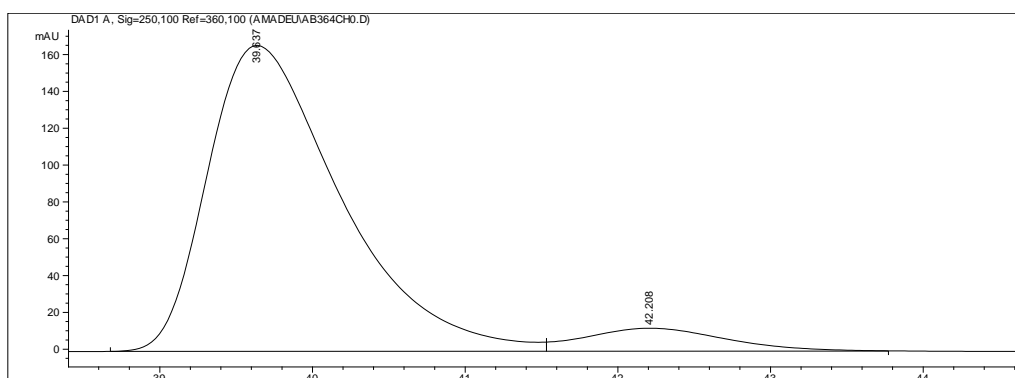

2d

$^1\text{H}$  NMR (400 MHz,  $\text{CDCl}_3$ )

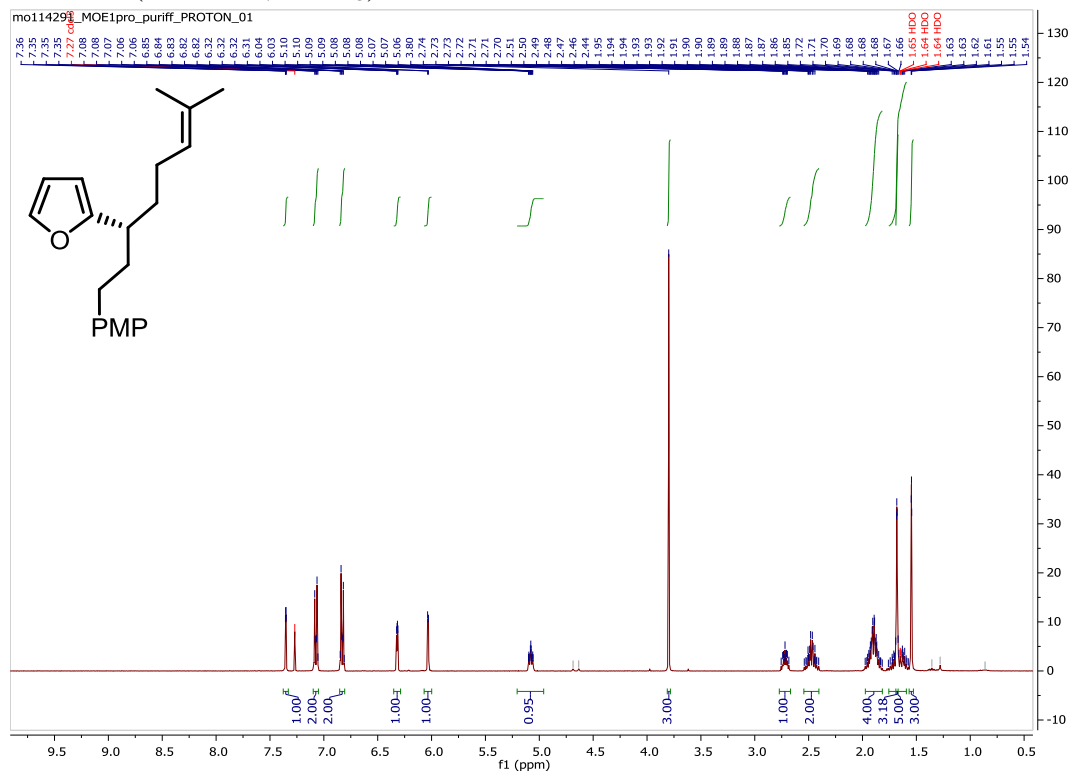

$^{13}\text{C}$  NMR (100 MHz,  $\text{CDCl}_3$ )

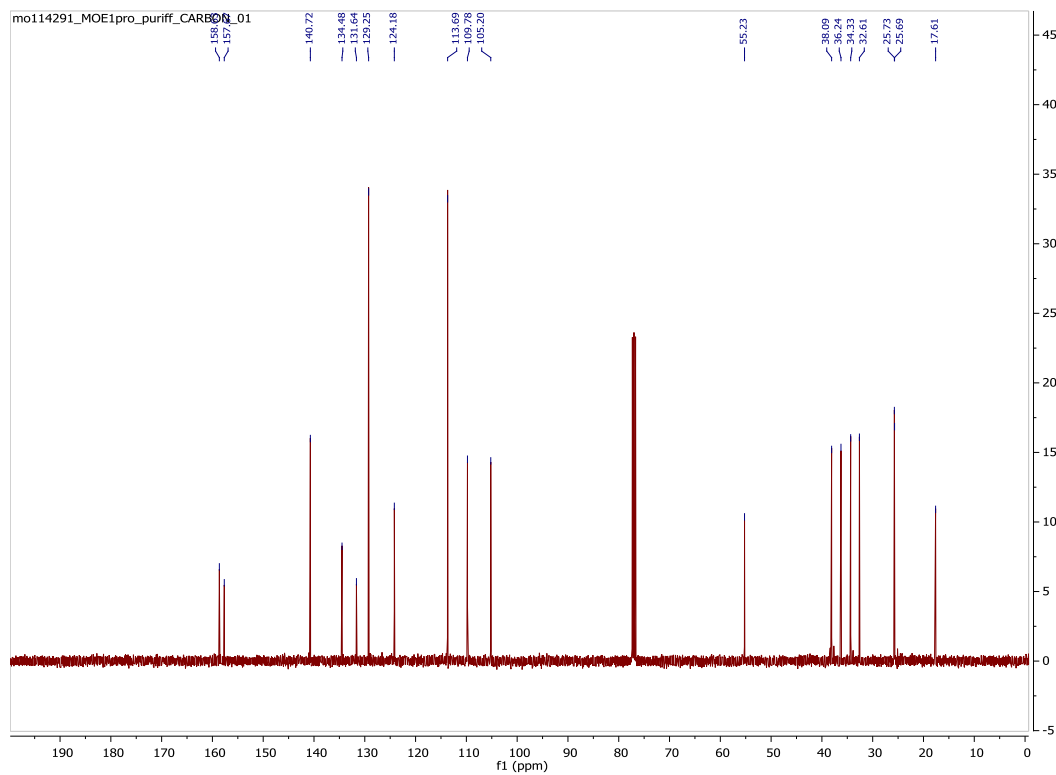

### Chiral HPLC traces: racemic

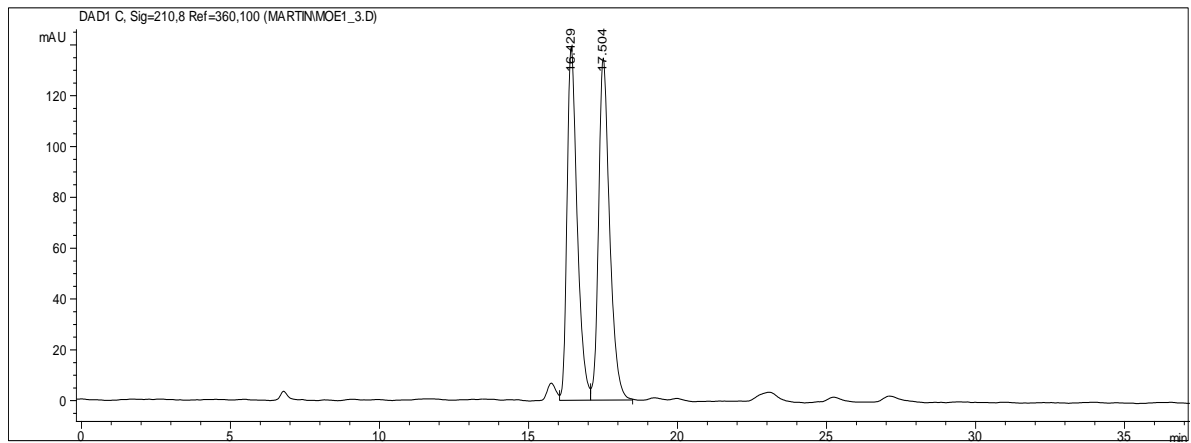

### Chiral HPLC traces: enantioenriched

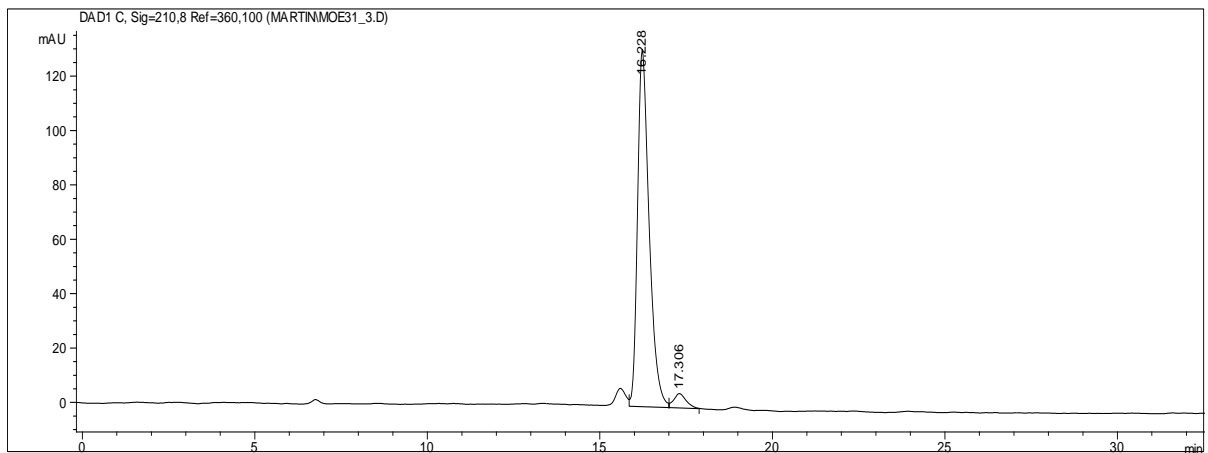



### Chiral SFC traces: racemic

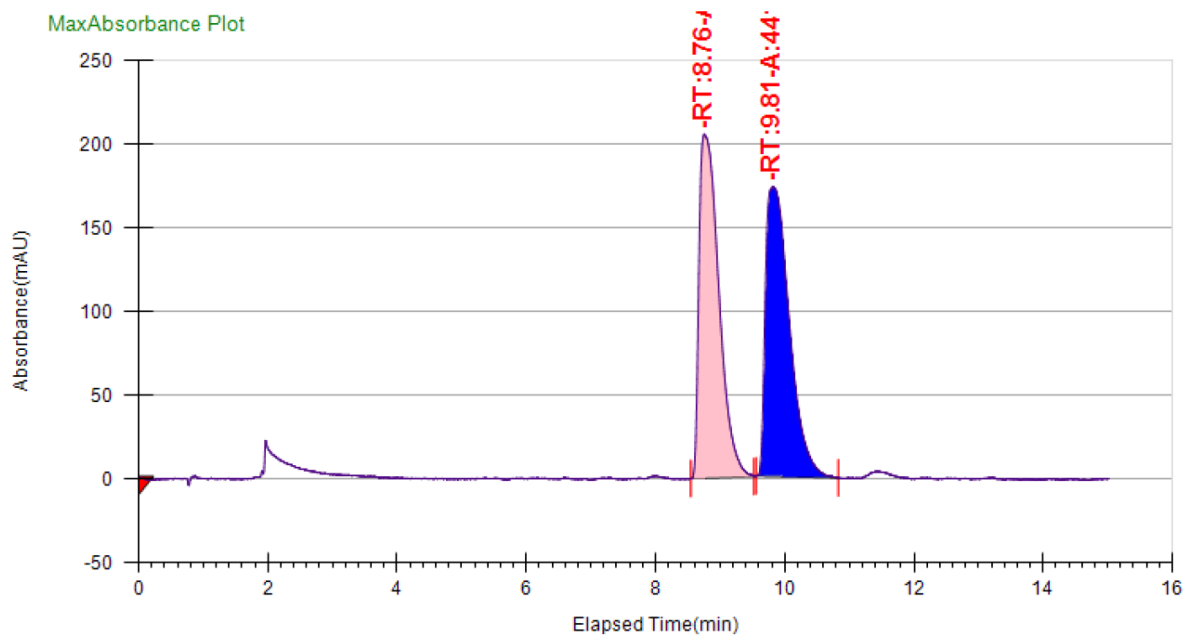

### Chiral SFC traces: enantioenriched

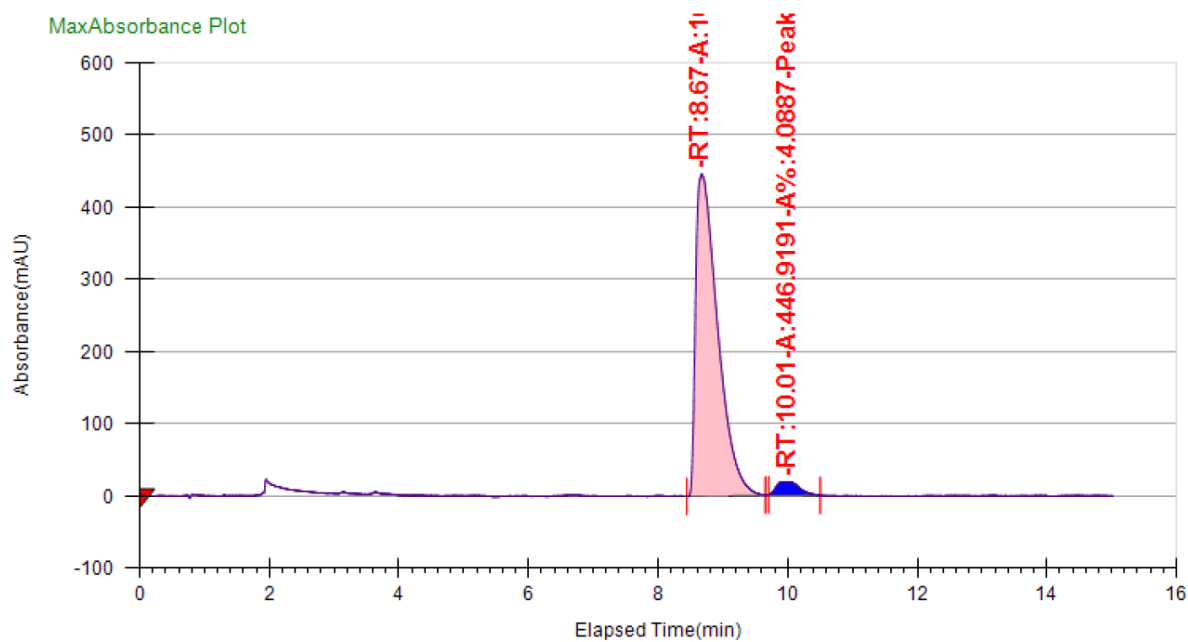

2s

<sup>1</sup>H NMR (400 MHz, CDCl<sub>3</sub>)

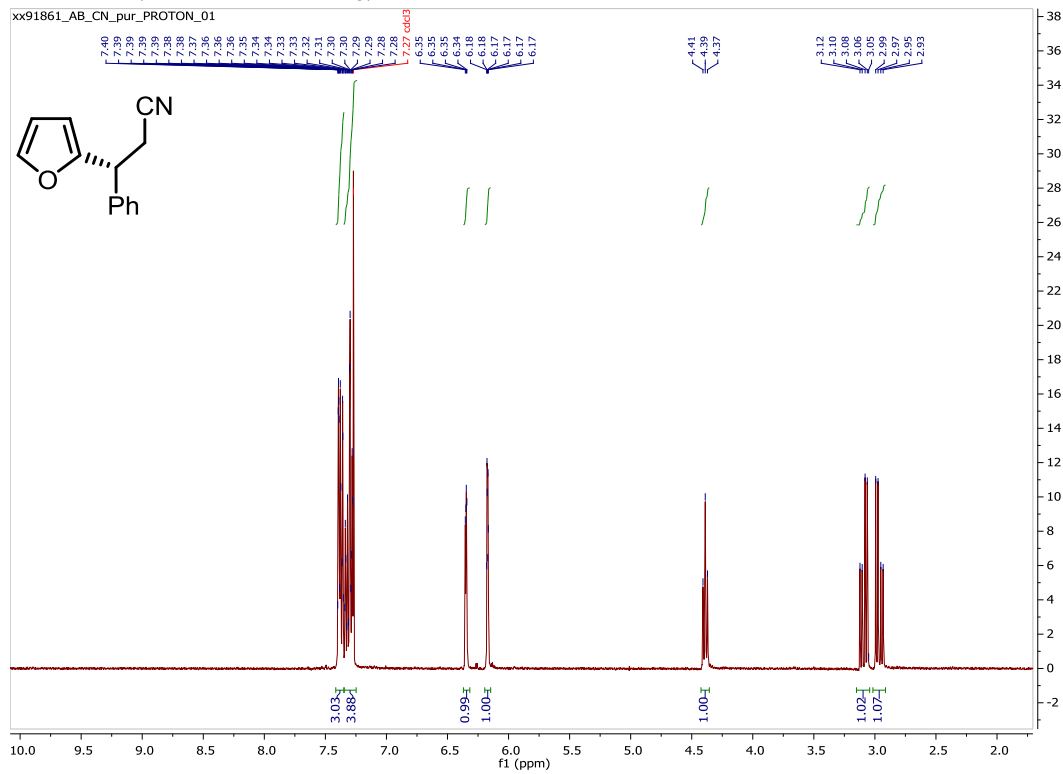

<sup>13</sup>C NMR (100 MHz, CDCl<sub>3</sub>)

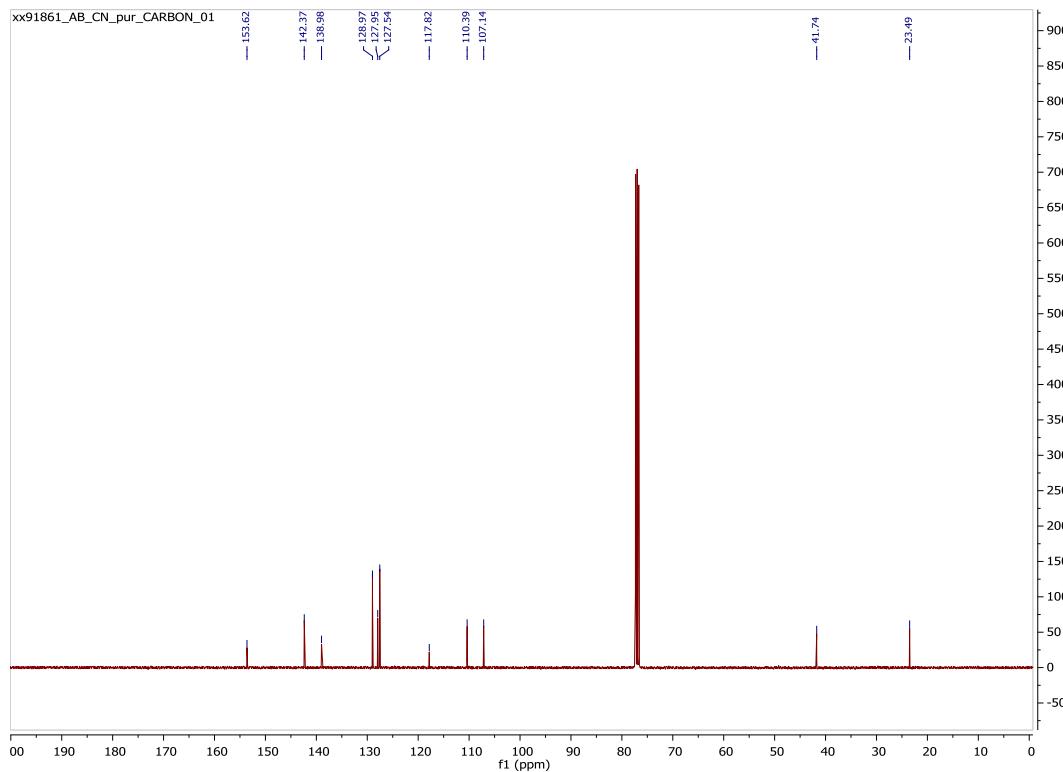



### Chiral SFC traces: racemic

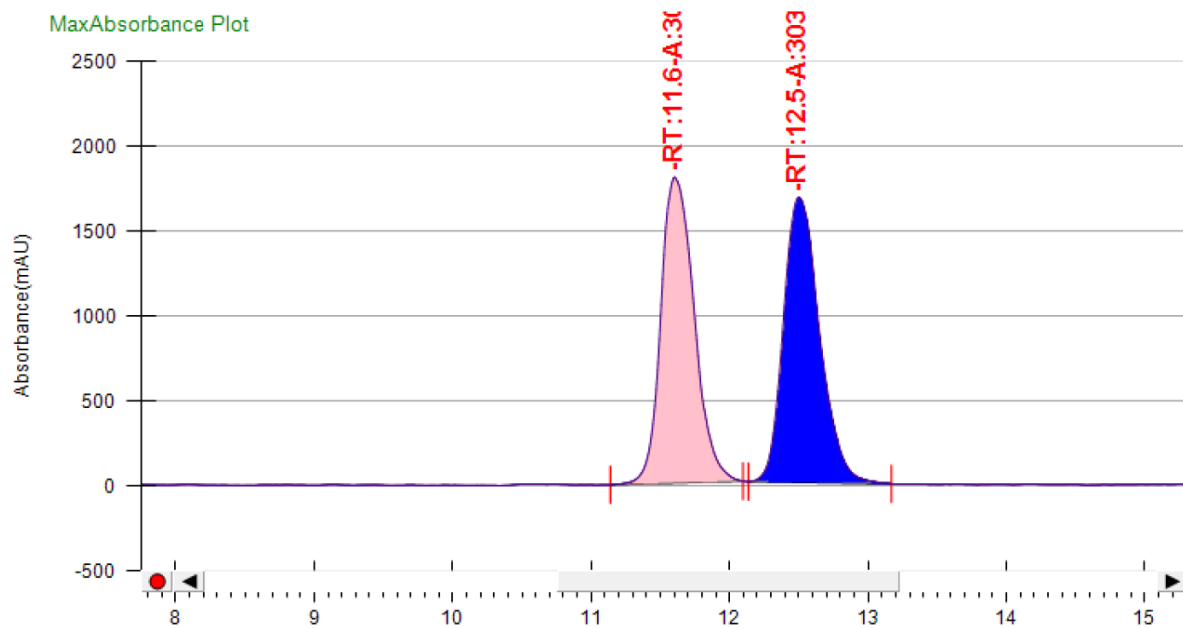

### Chiral SFC traces: enantioenriched

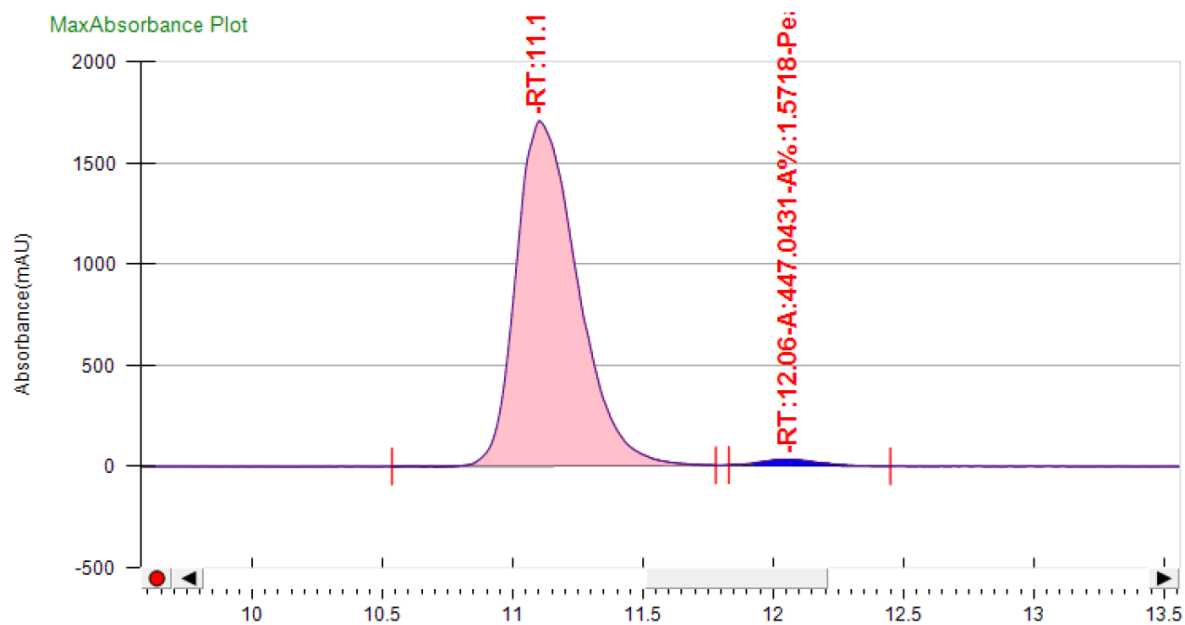

**2m**

$^1\text{H}$  NMR (400 MHz,  $\text{CDCl}_3$ )

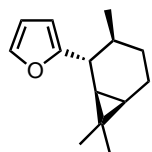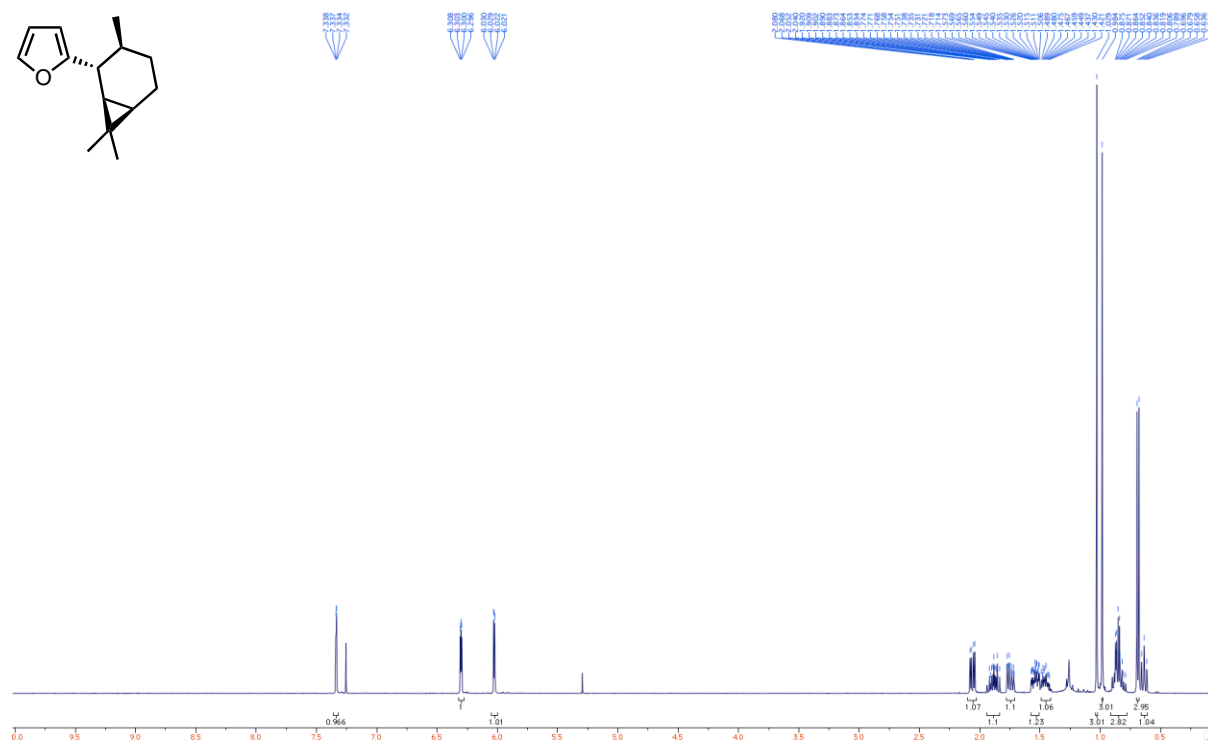

$^{13}\text{C}$  NMR (100 MHz,  $\text{CDCl}_3$ )

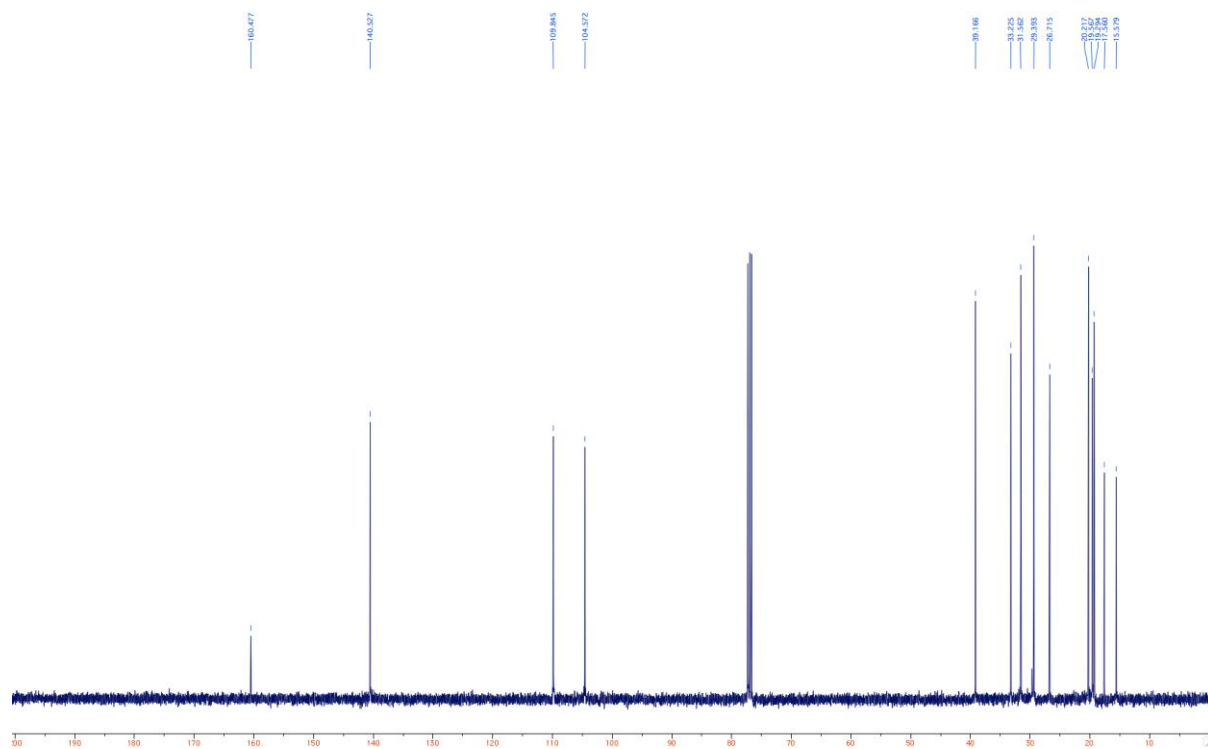

**2n**

$^1\text{H}$  NMR (400 MHz,  $\text{CDCl}_3$ )

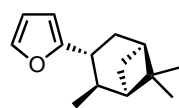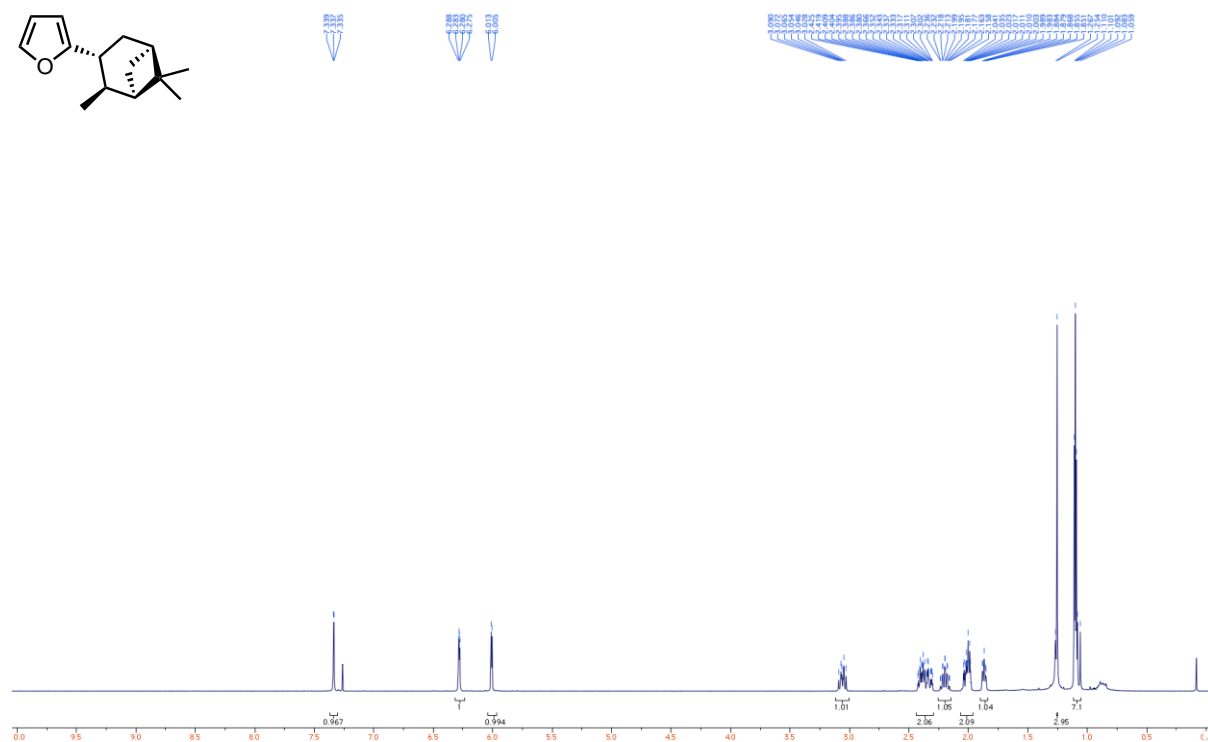

$^{13}\text{C}$  NMR (100 MHz,  $\text{CDCl}_3$ )

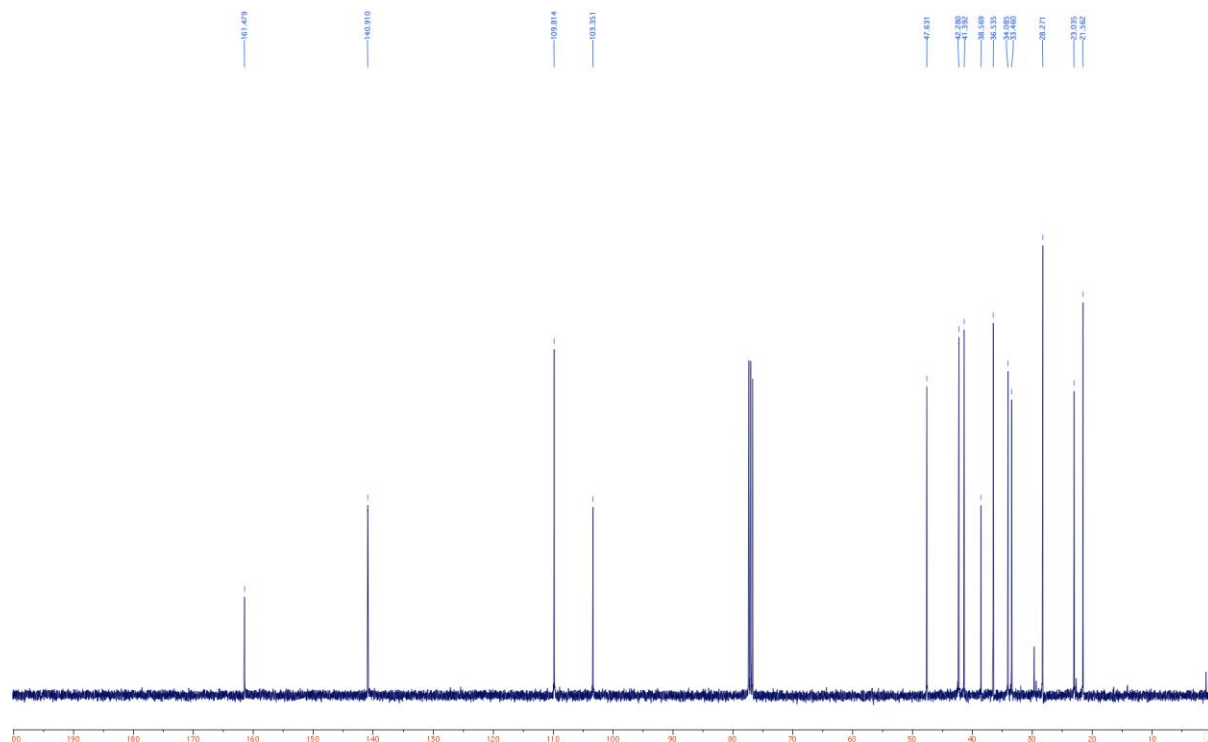



2t

$^1\text{H}$  NMR (400 MHz,  $\text{CDCl}_3$ )

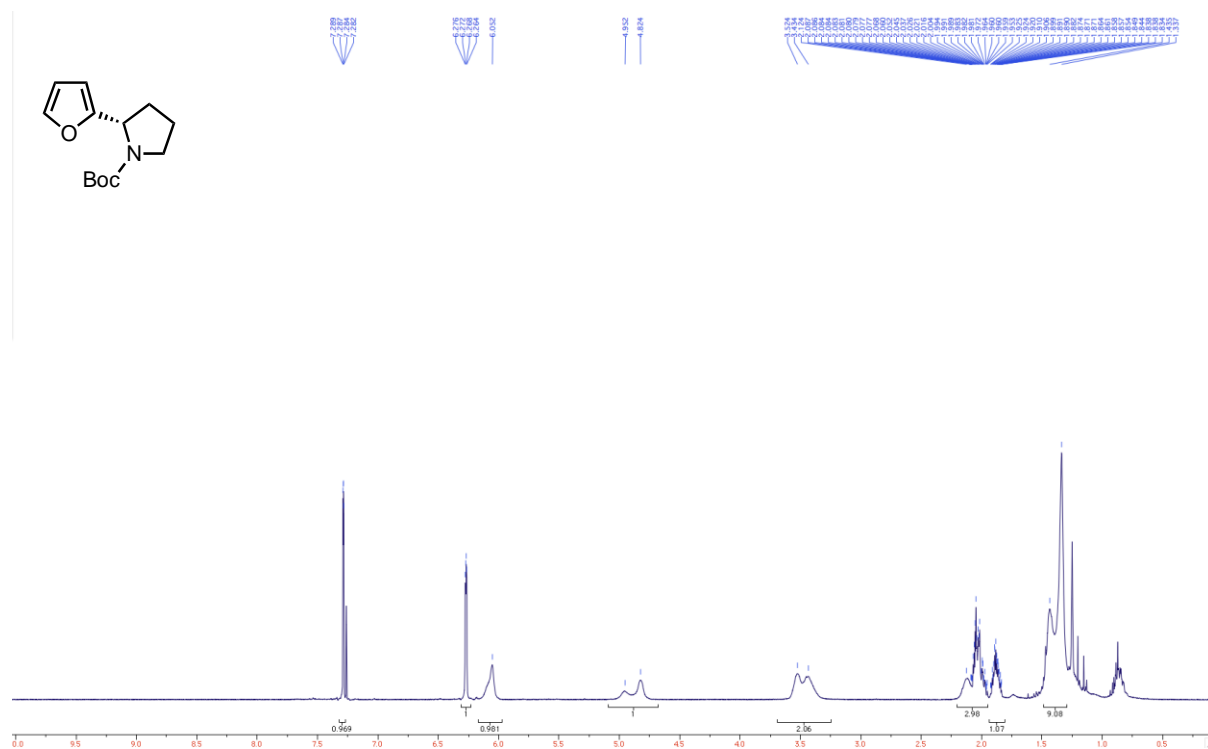

$^{13}\text{C}$  NMR (100 MHz,  $\text{CDCl}_3$ )

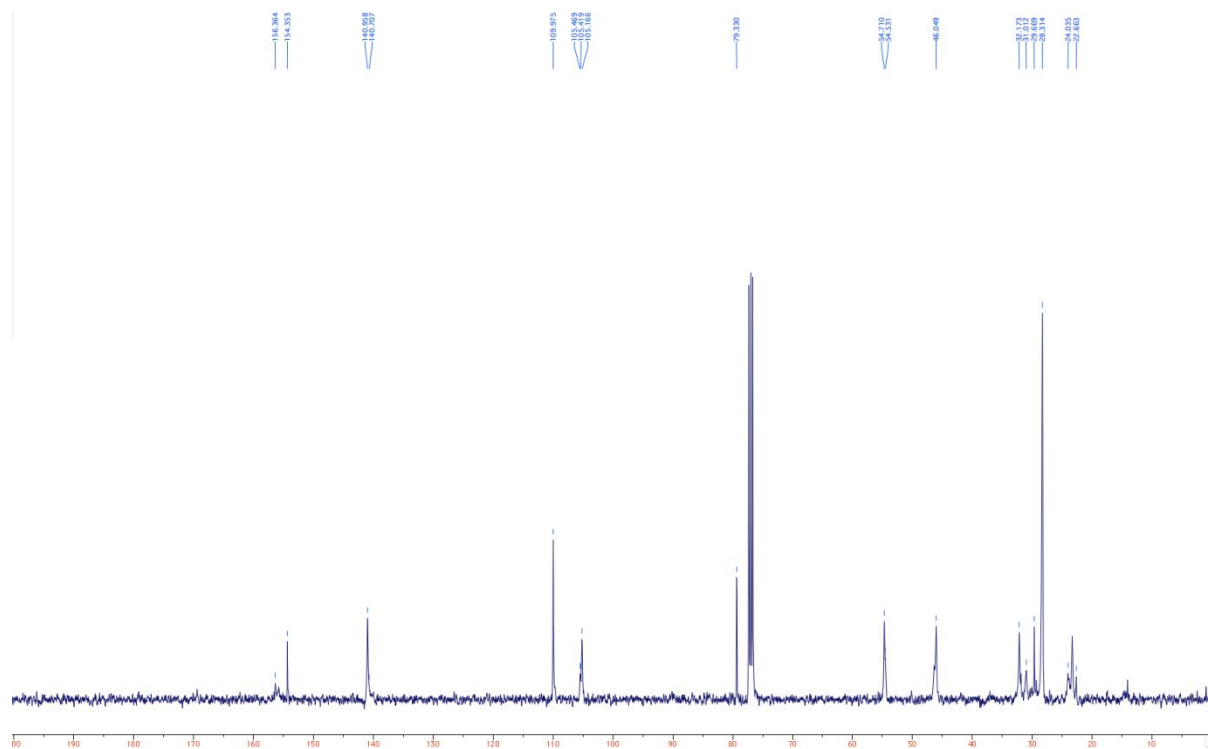

### Chiral SFC traces: racemic

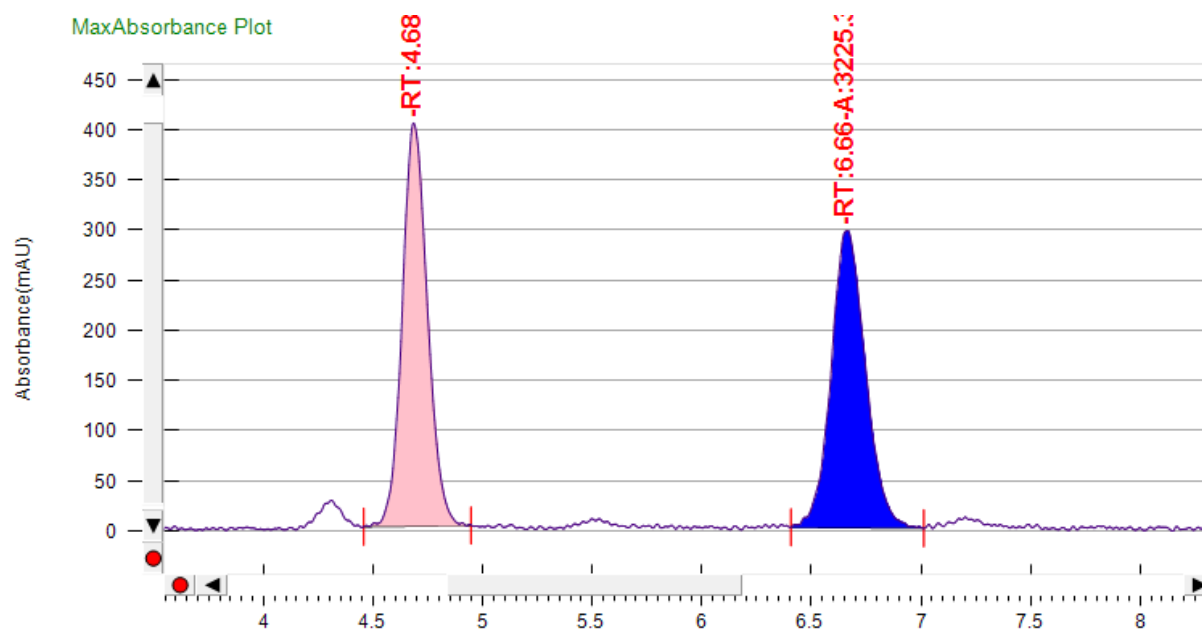

### Chiral SFC traces: enantioenriched

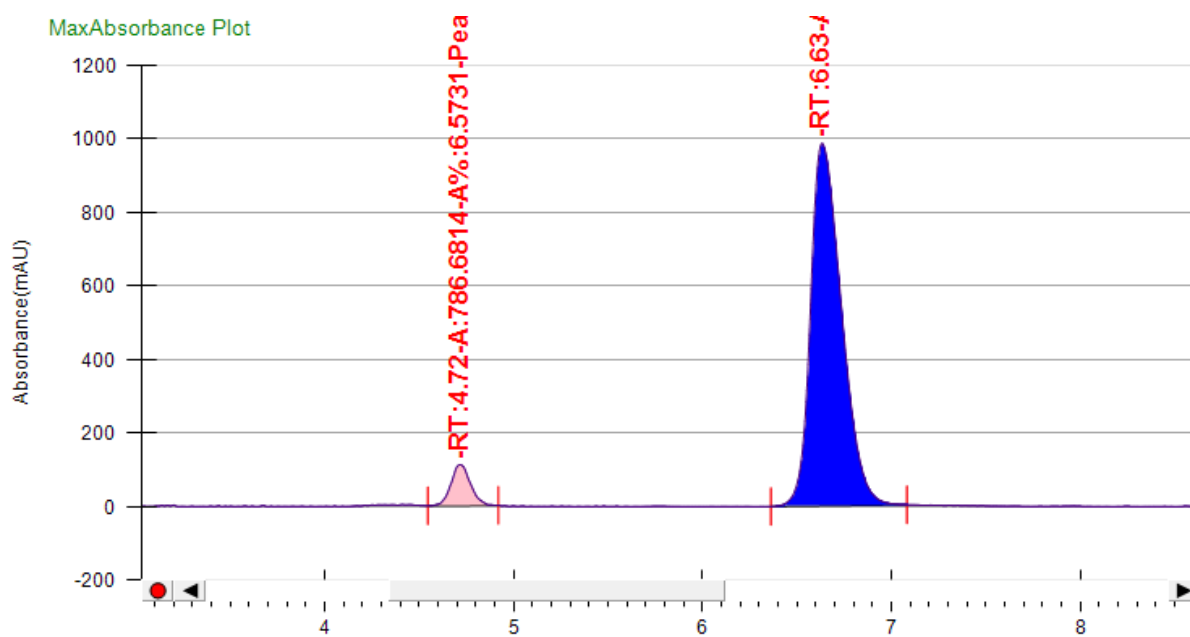

2r

<sup>1</sup>H NMR (400 MHz, CDCl<sub>3</sub>)

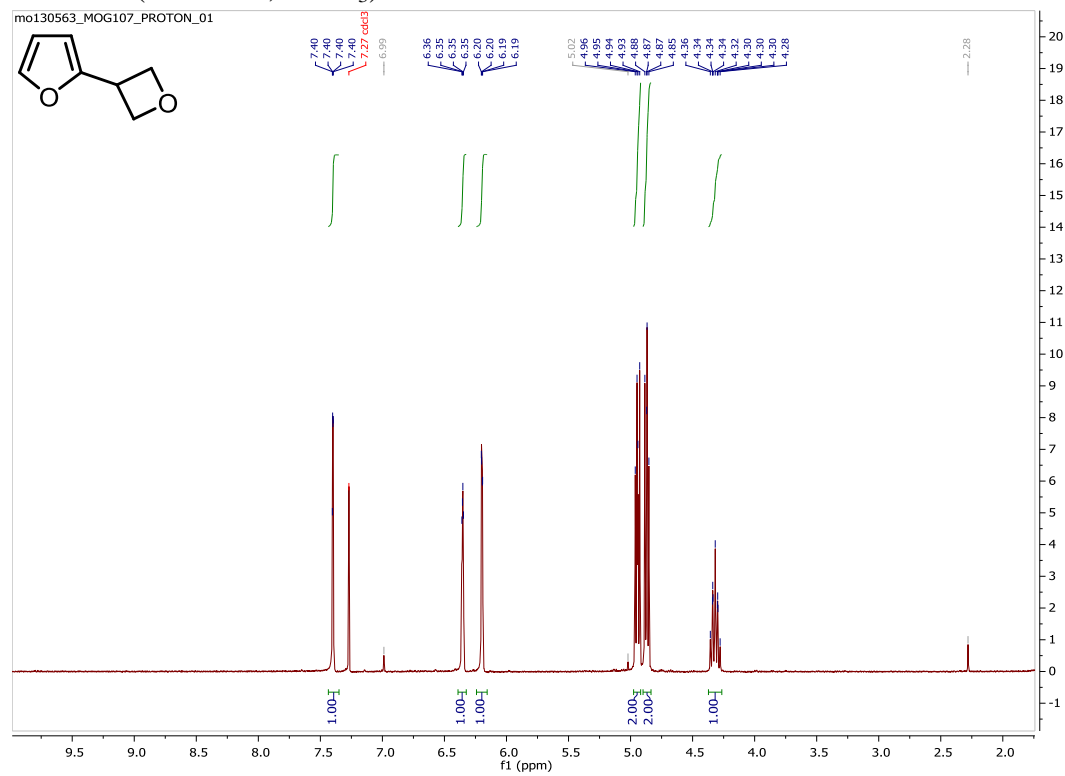

<sup>13</sup>C NMR (100 MHz, CDCl<sub>3</sub>)

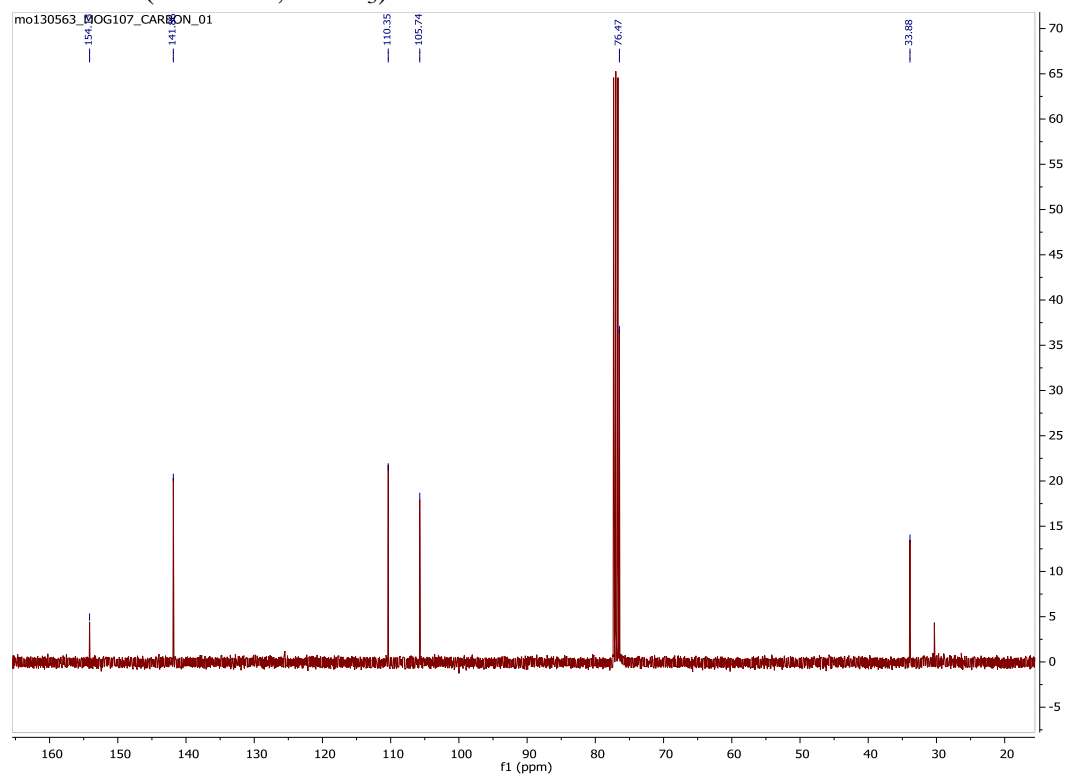

20

$^1\text{H}$  NMR (400 MHz,  $\text{CDCl}_3$ )

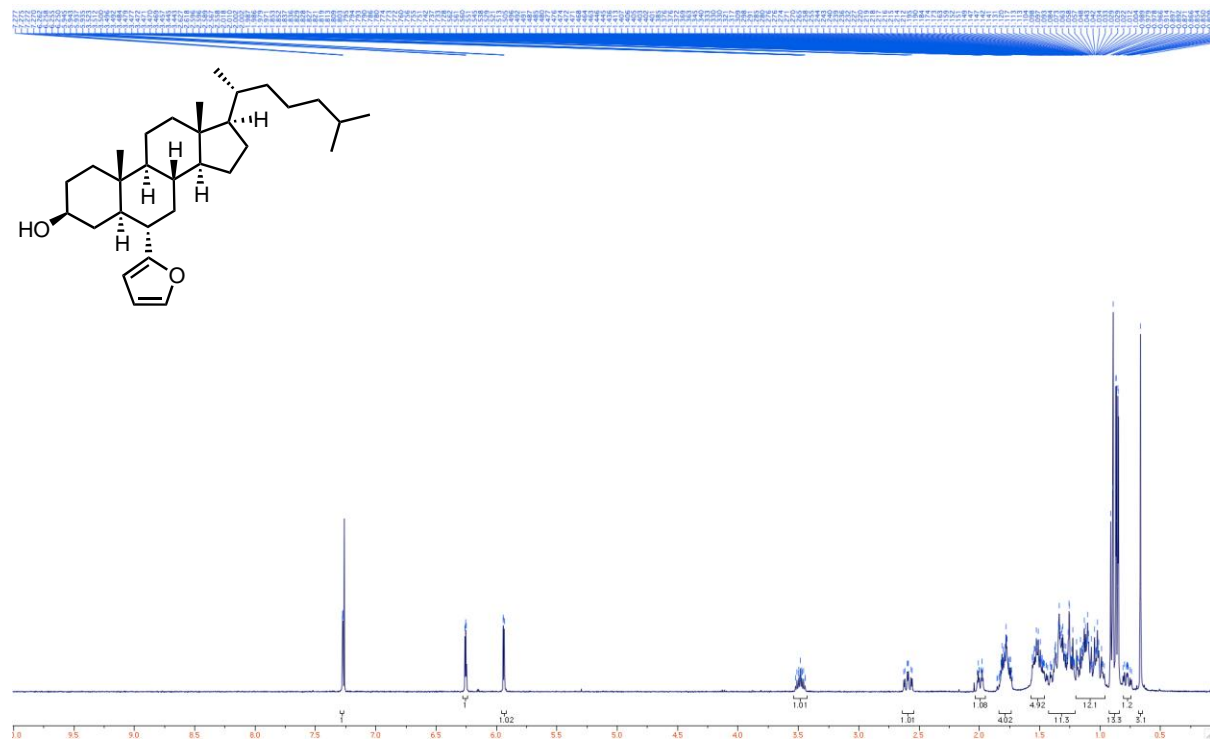

$^{13}\text{C}$  NMR (100 MHz,  $\text{CDCl}_3$ )

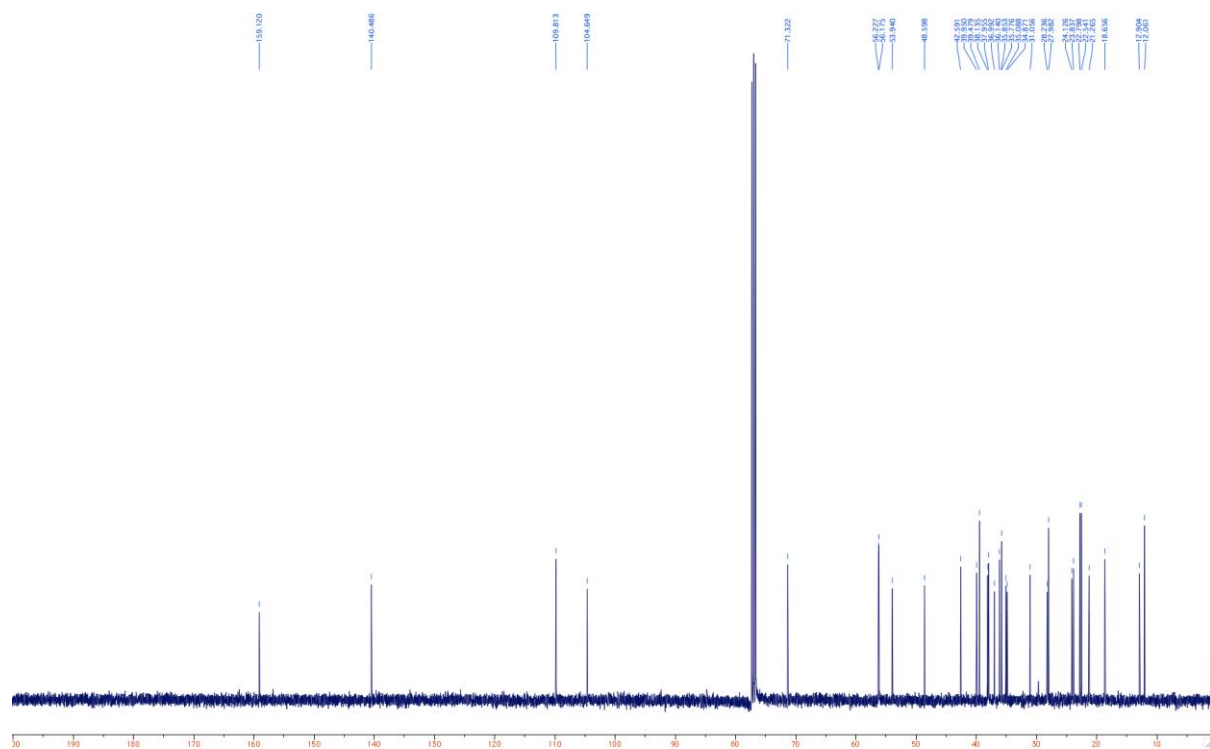



2g

$^1\text{H}$  NMR (400 MHz,  $\text{CDCl}_3$ )

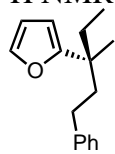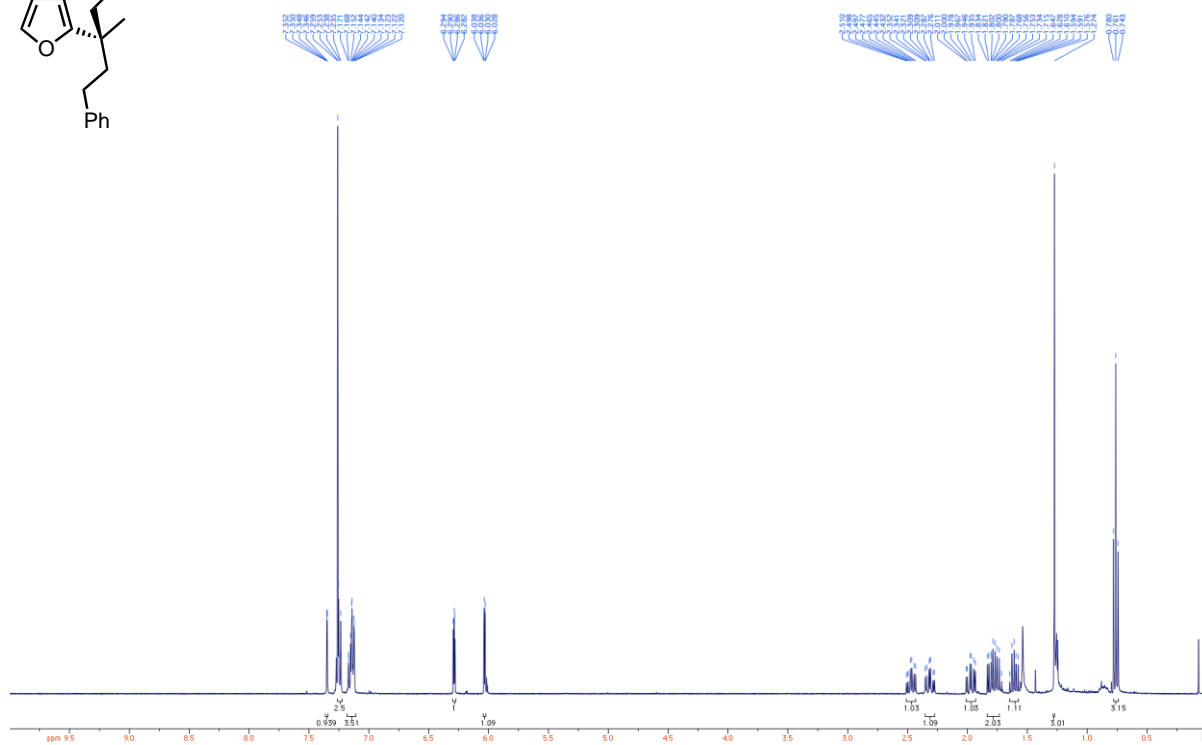

$^{13}\text{C}$  NMR (100 MHz,  $\text{CDCl}_3$ )

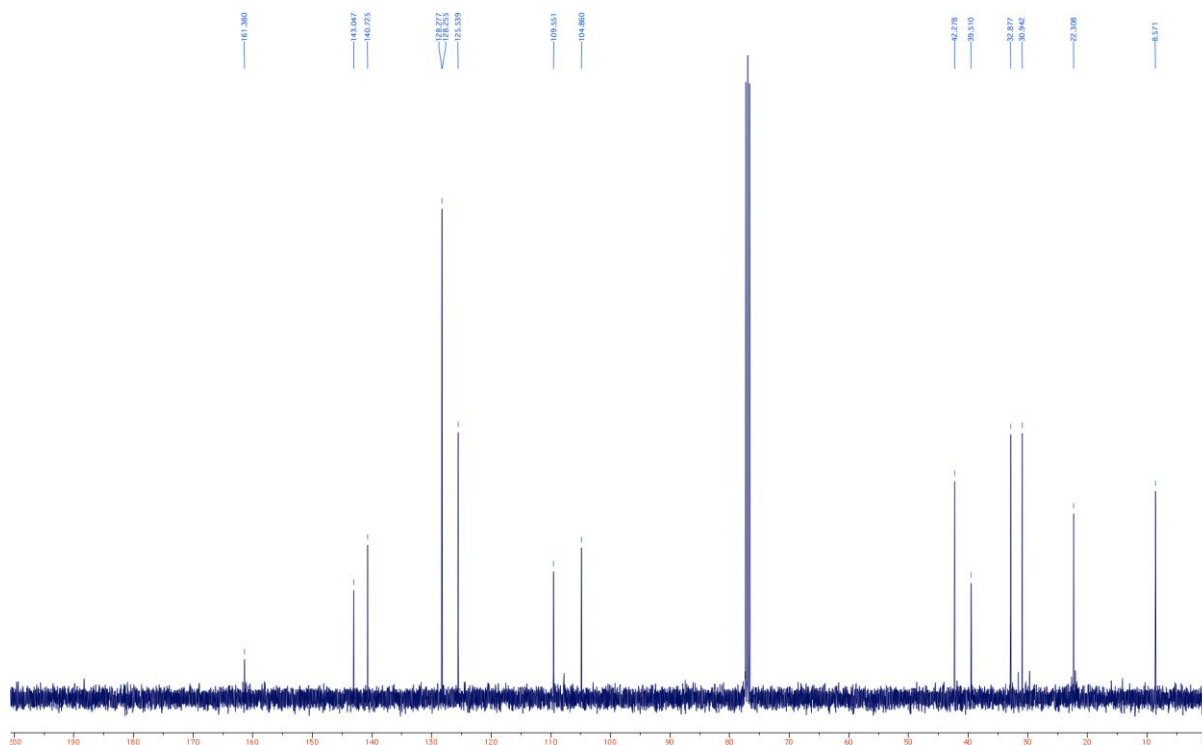

### Chiral HPLC traces: racemic

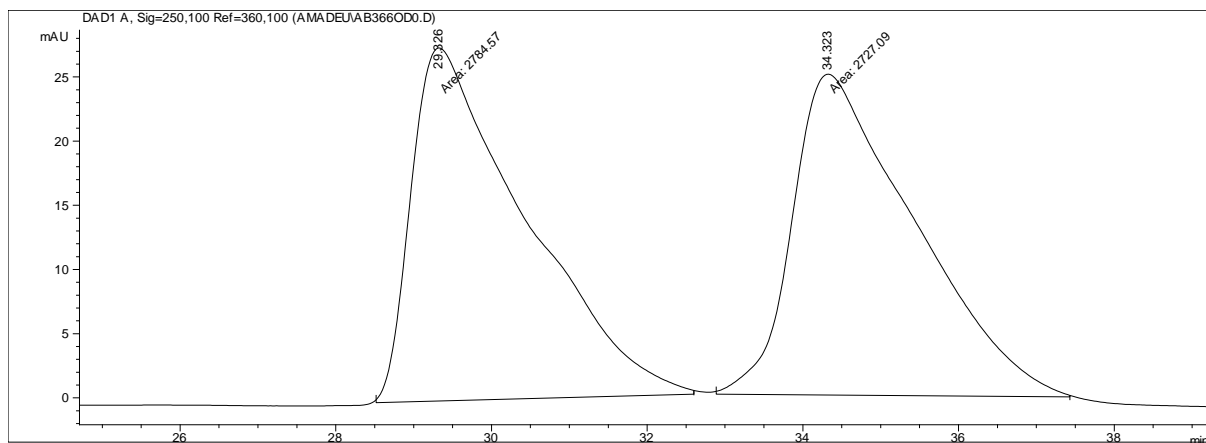

### Chiral HPLC traces: enantioenriched

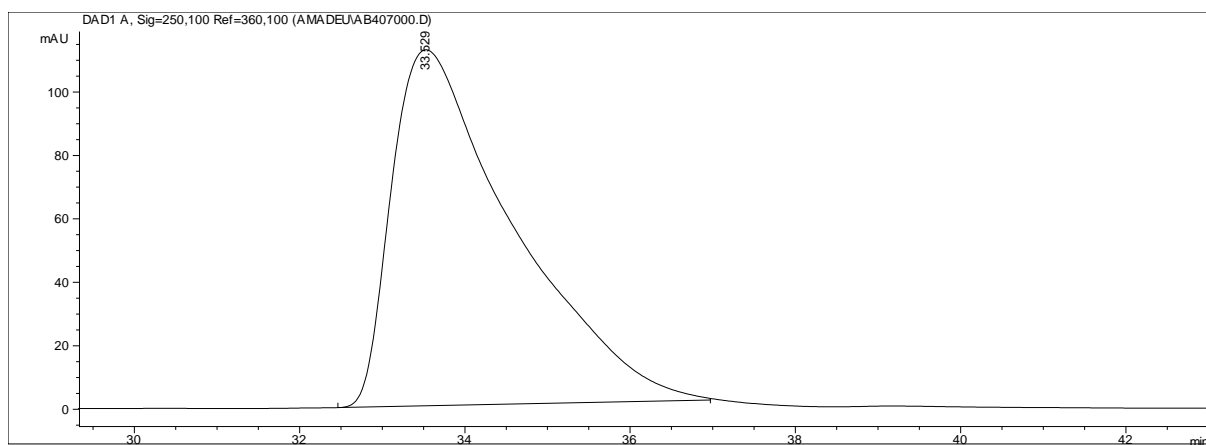

**2h**

$^1\text{H}$  NMR (400 MHz,  $\text{CDCl}_3$ )

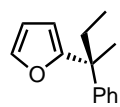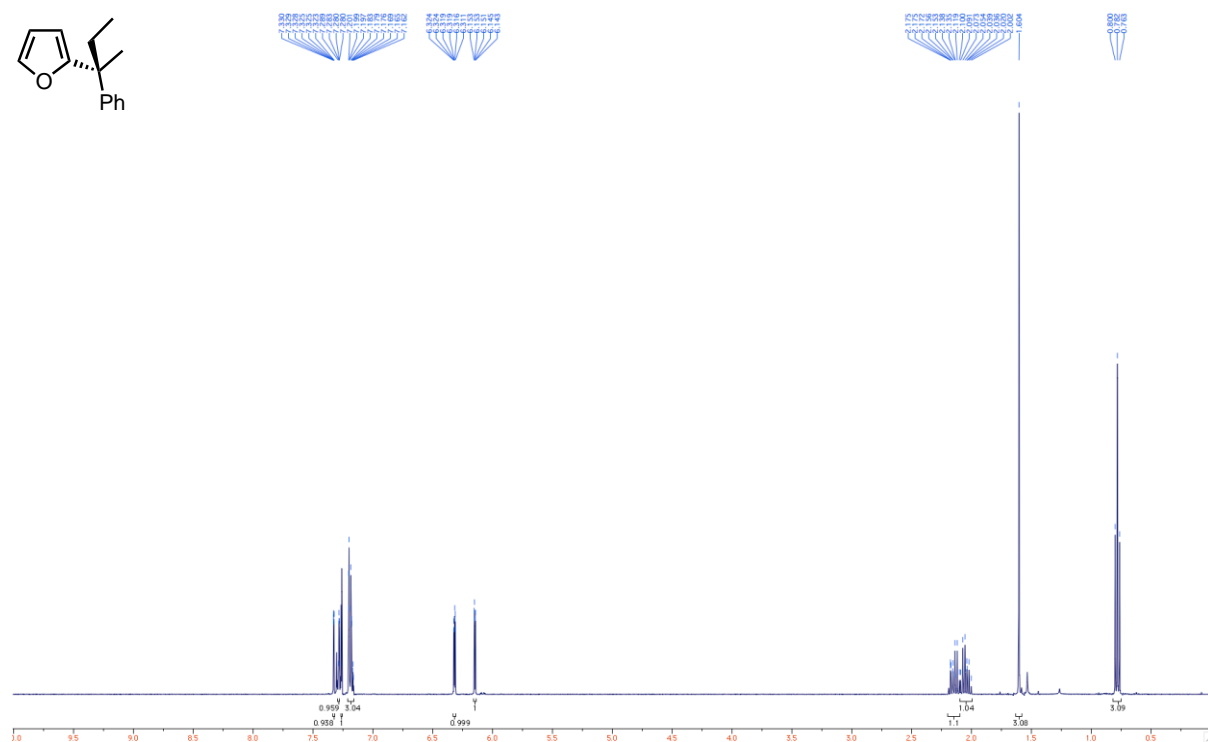

$^{13}\text{C}$  NMR (100 MHz,  $\text{CDCl}_3$ )

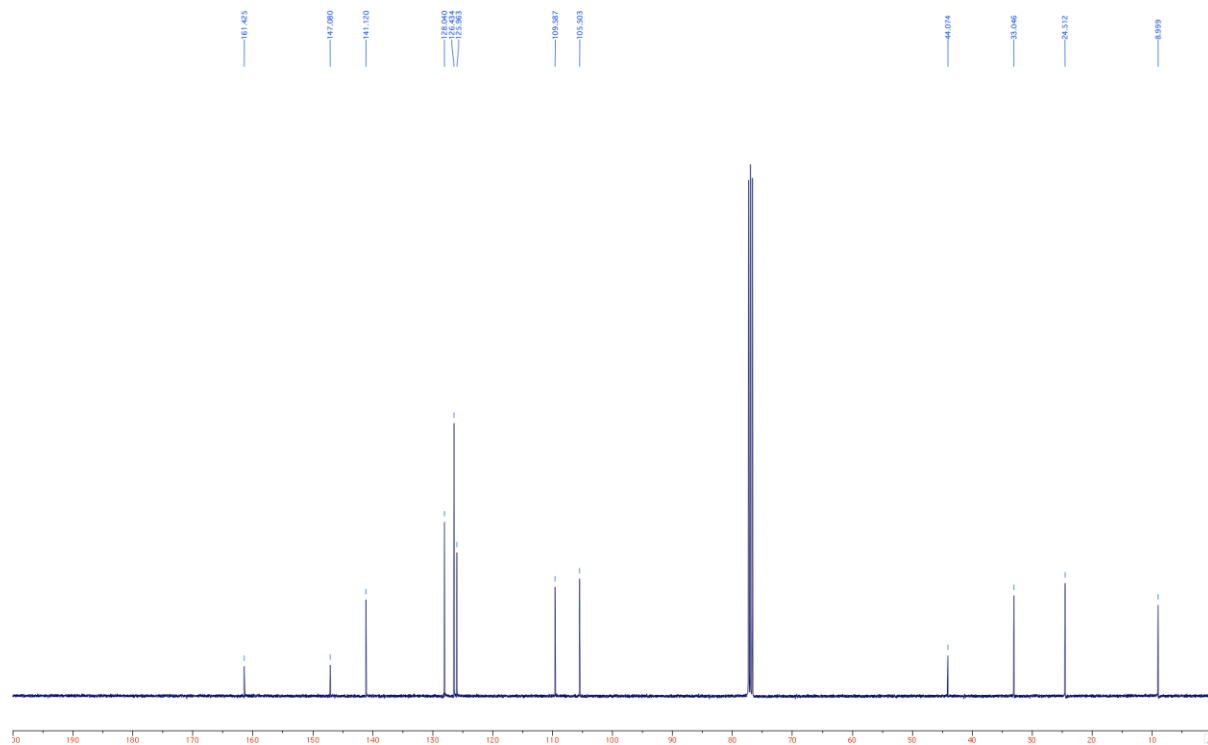

### Chiral HPLC traces: racemic

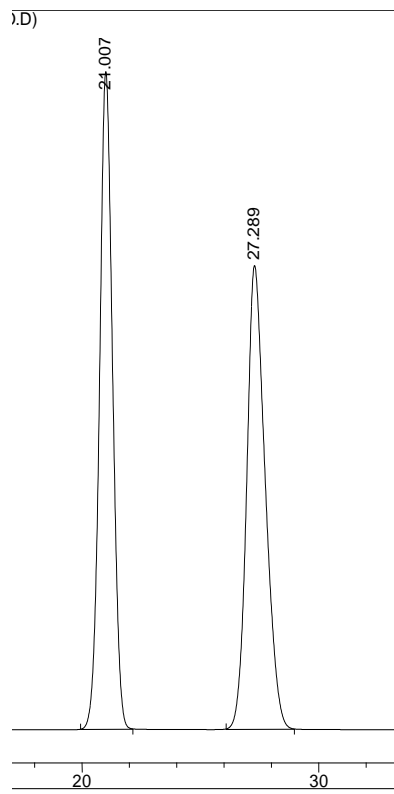

### Chiral HPLC traces: enantioenriched

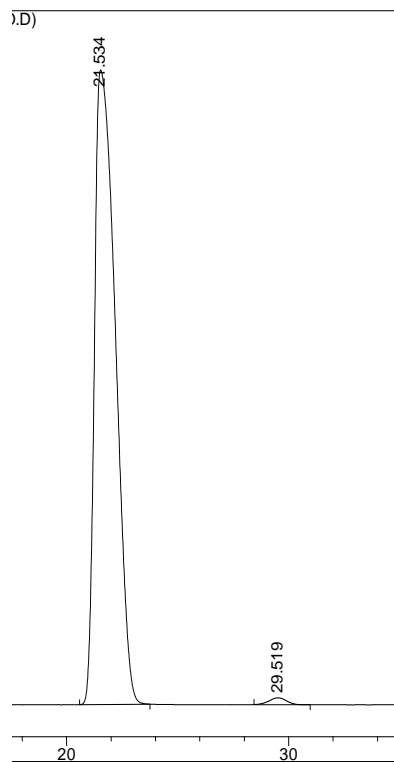

2i

$^1\text{H}$  NMR (400 MHz,  $\text{CDCl}_3$ )

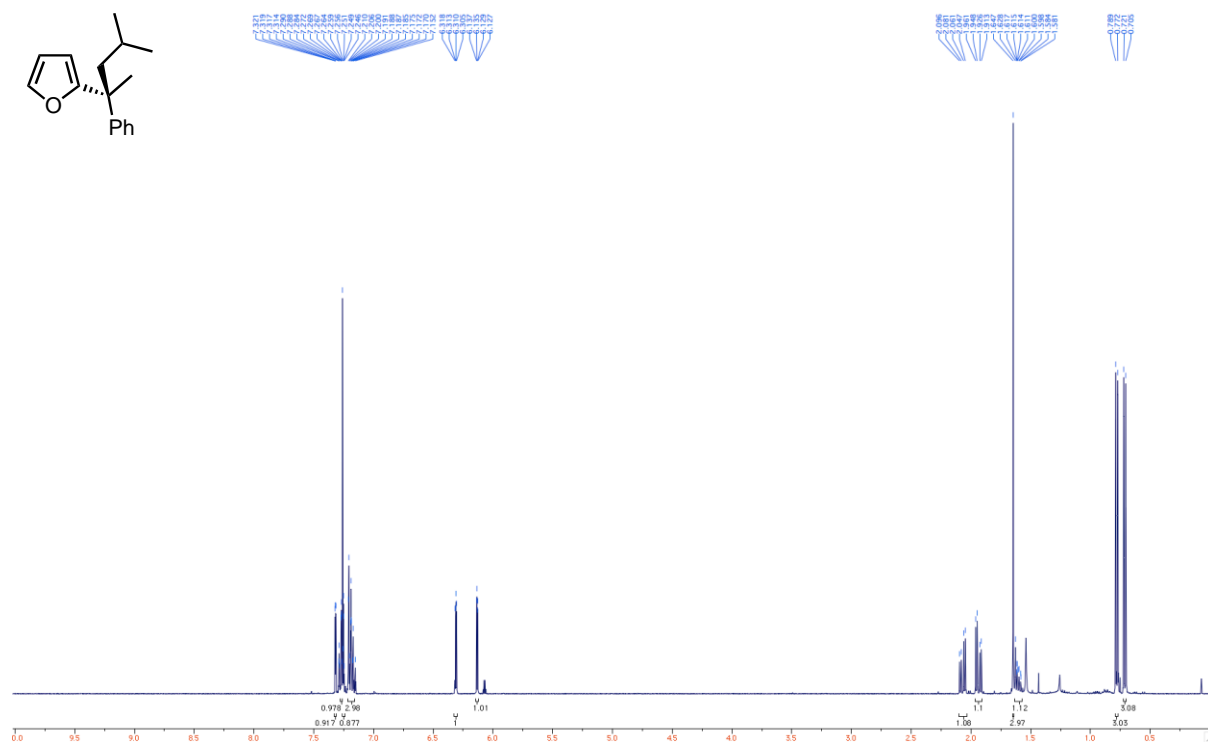

$^{13}\text{C}$  NMR (100 MHz,  $\text{CDCl}_3$ )

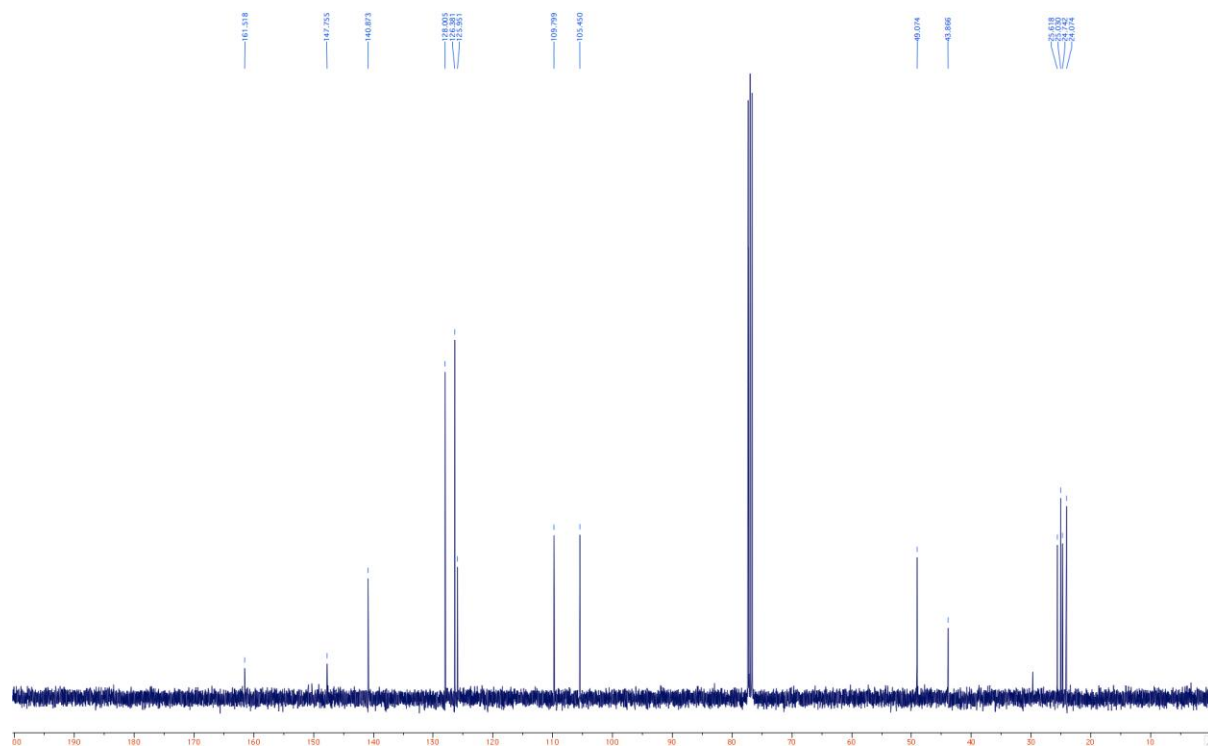

Chiral GC traces: racemic

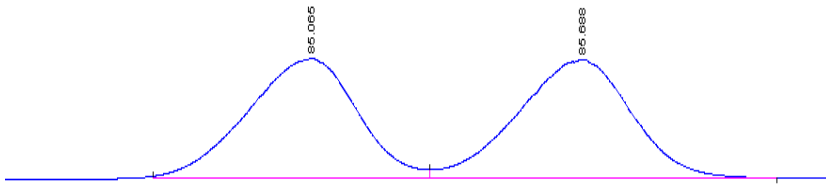

Chiral GC traces: enantioenriched

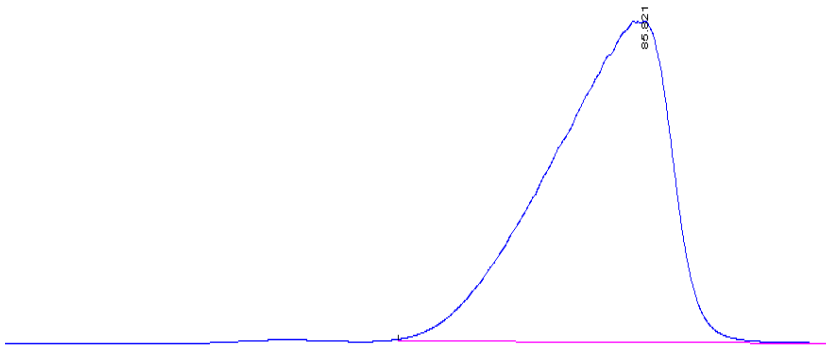

2j

$^1\text{H}$  NMR (400 MHz,  $\text{CDCl}_3$ )

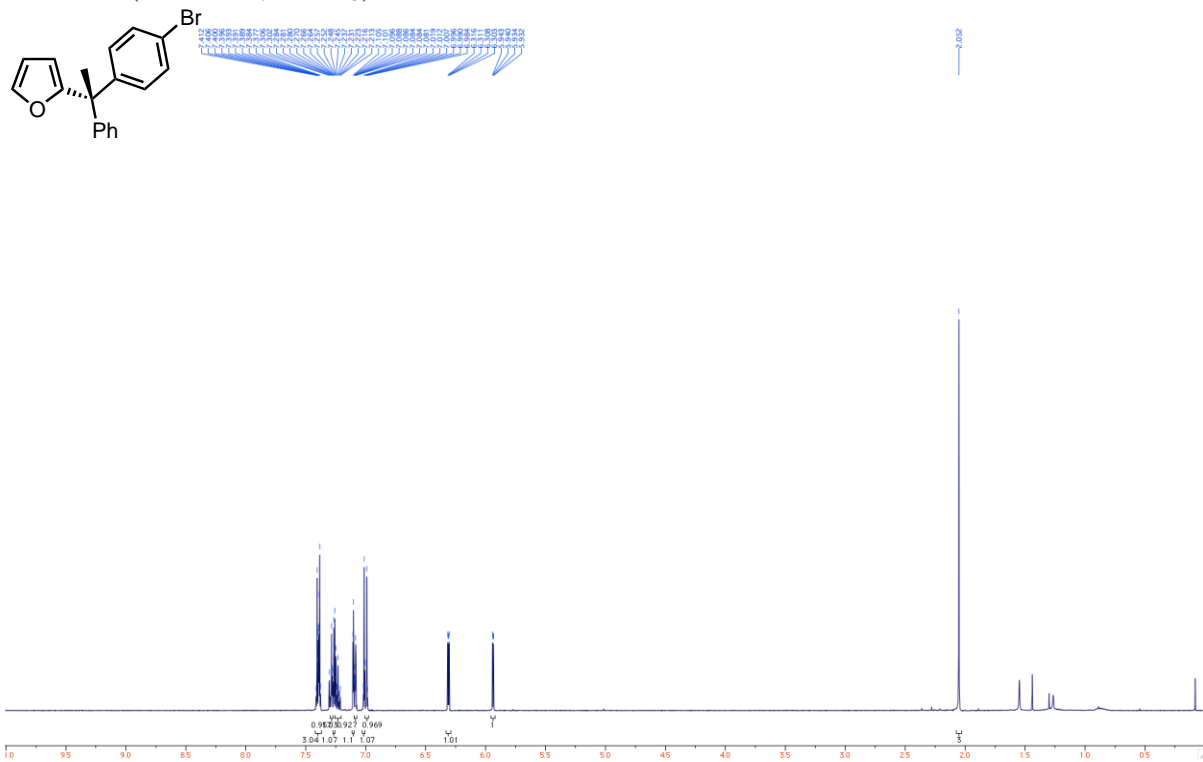

$^{13}\text{C}$  NMR (100 MHz,  $\text{CDCl}_3$ )

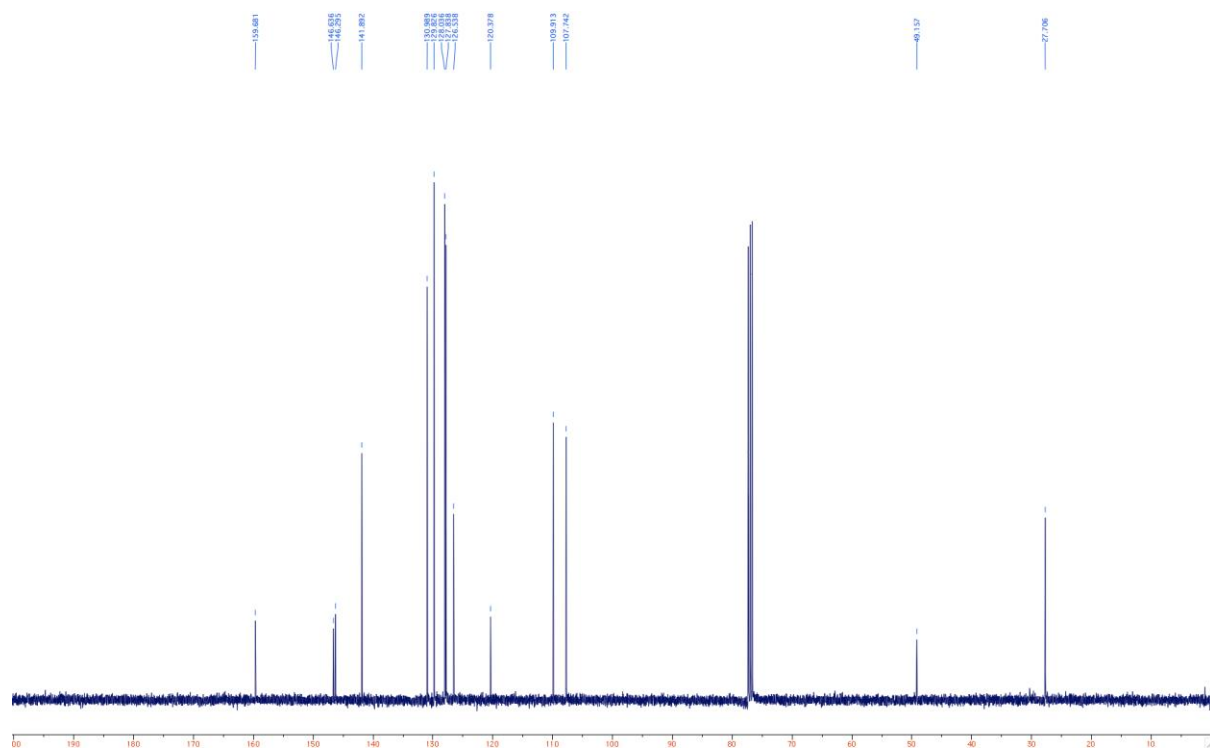

### Chiral HPLC traces: racemic

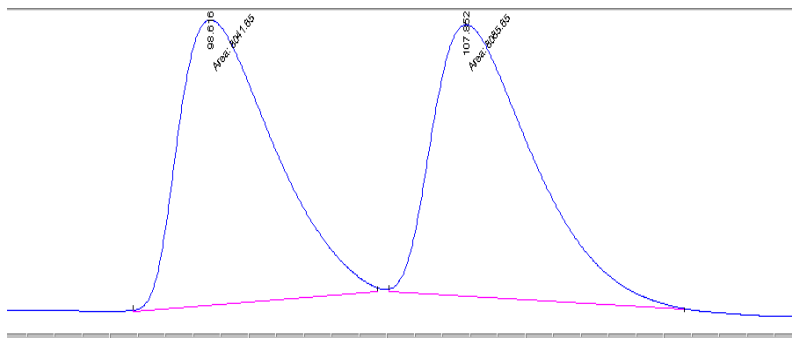

### Chiral HPLC traces: enantioenriched

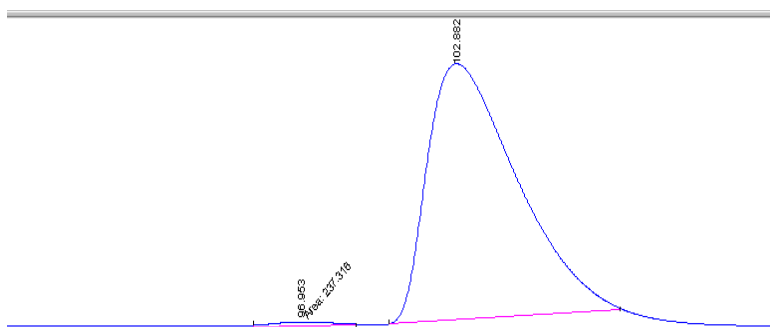

### Chiral HPLC traces: racemic + enantioenriched

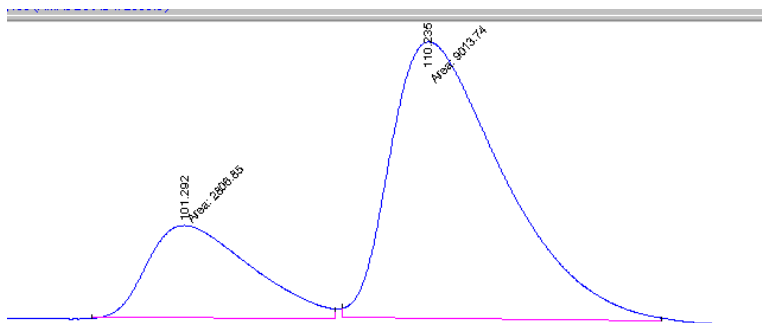



2k

<sup>1</sup>H NMR (400 MHz, CDCl<sub>3</sub>)

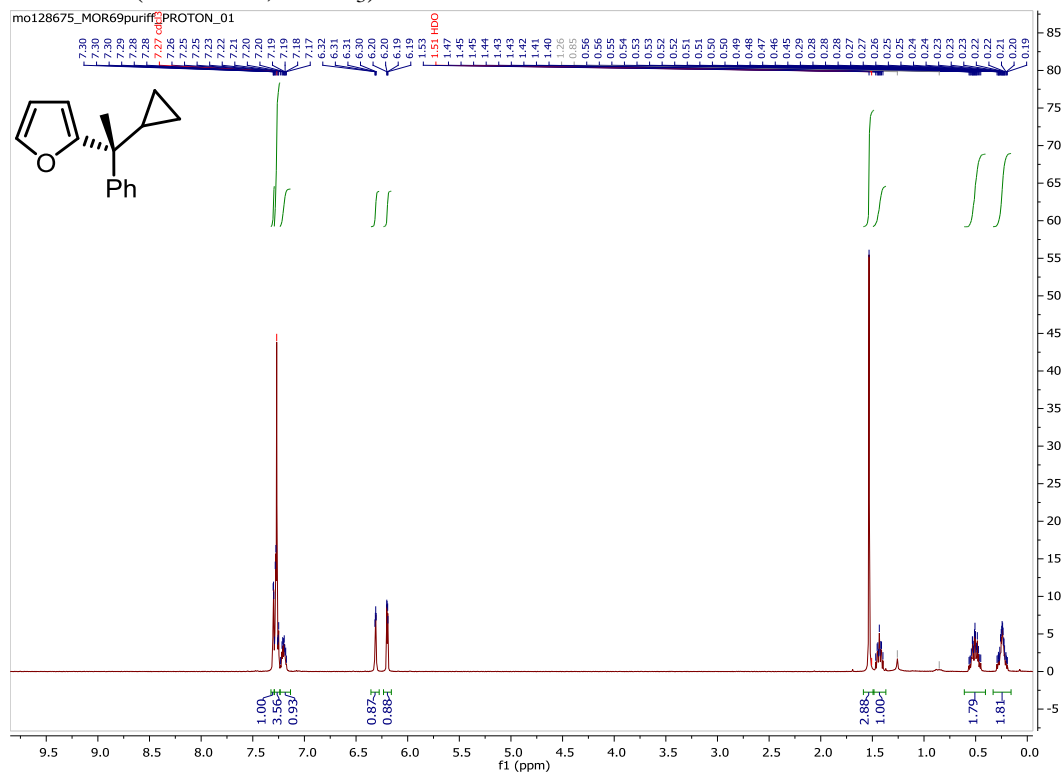

<sup>13</sup>C NMR (100 MHz, CDCl<sub>3</sub>)

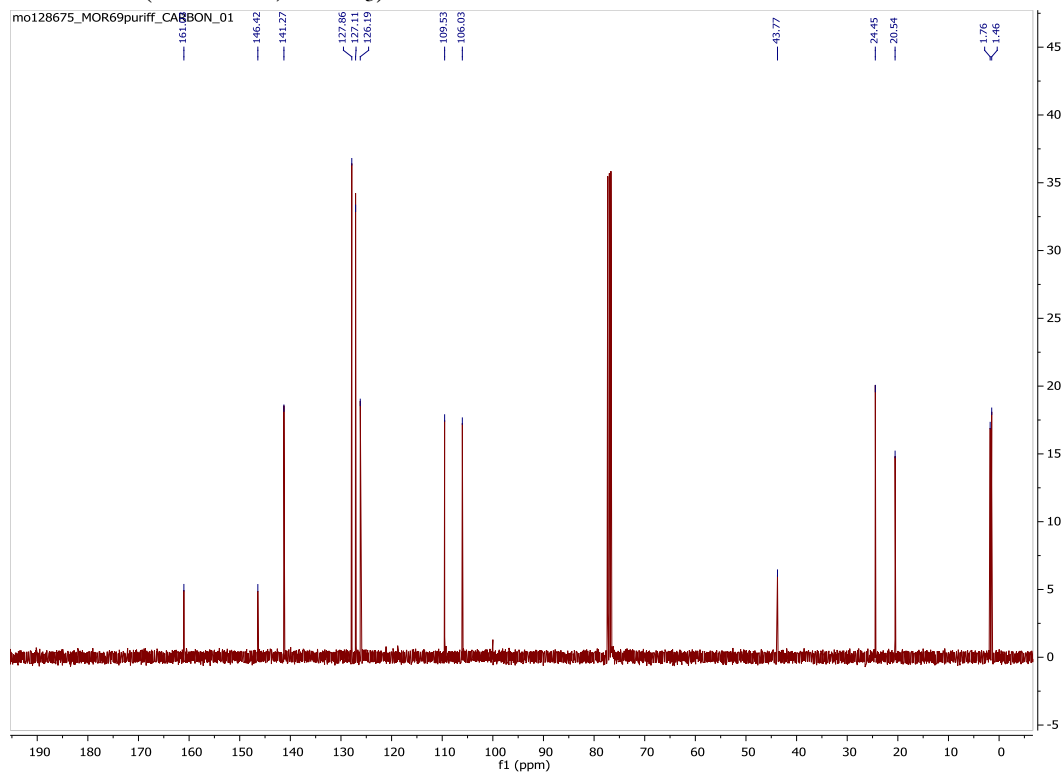

### Chiral HPLC traces: racemic

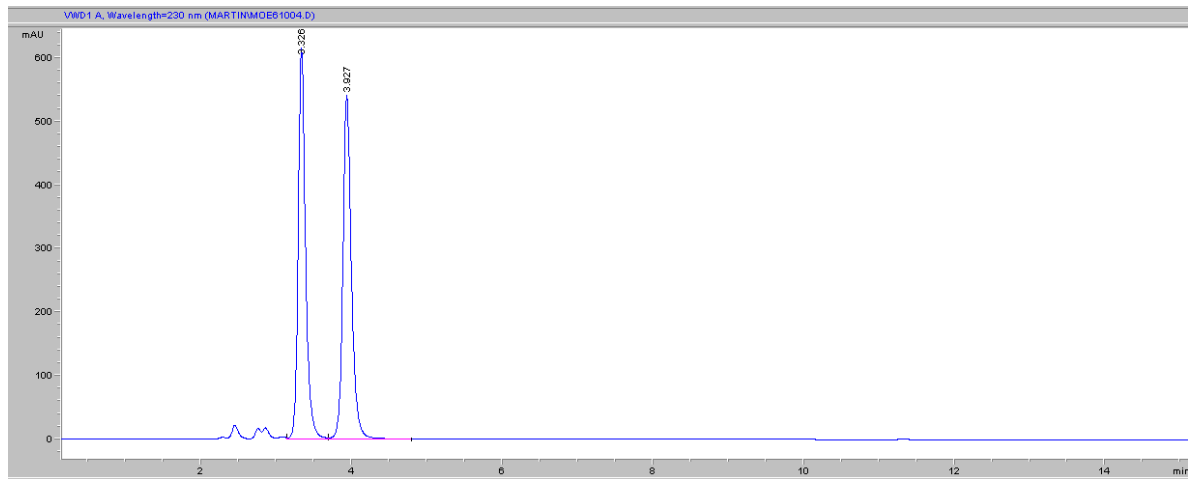

### Chiral HPLC traces: enantioenriched

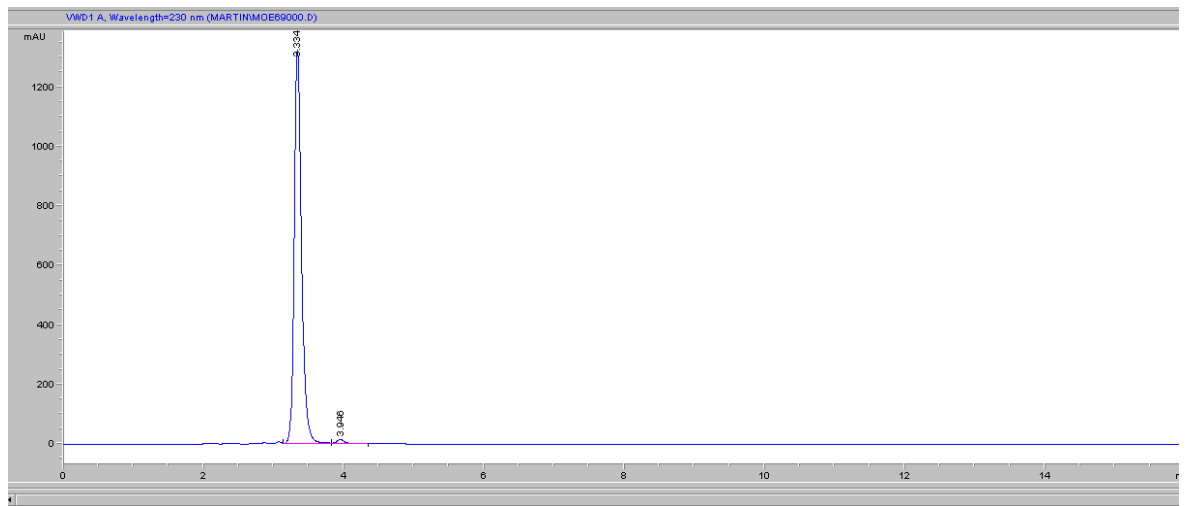

**3e**

$^1\text{H}$  NMR (400 MHz,  $\text{CDCl}_3$ )

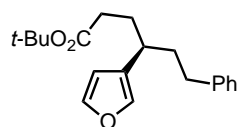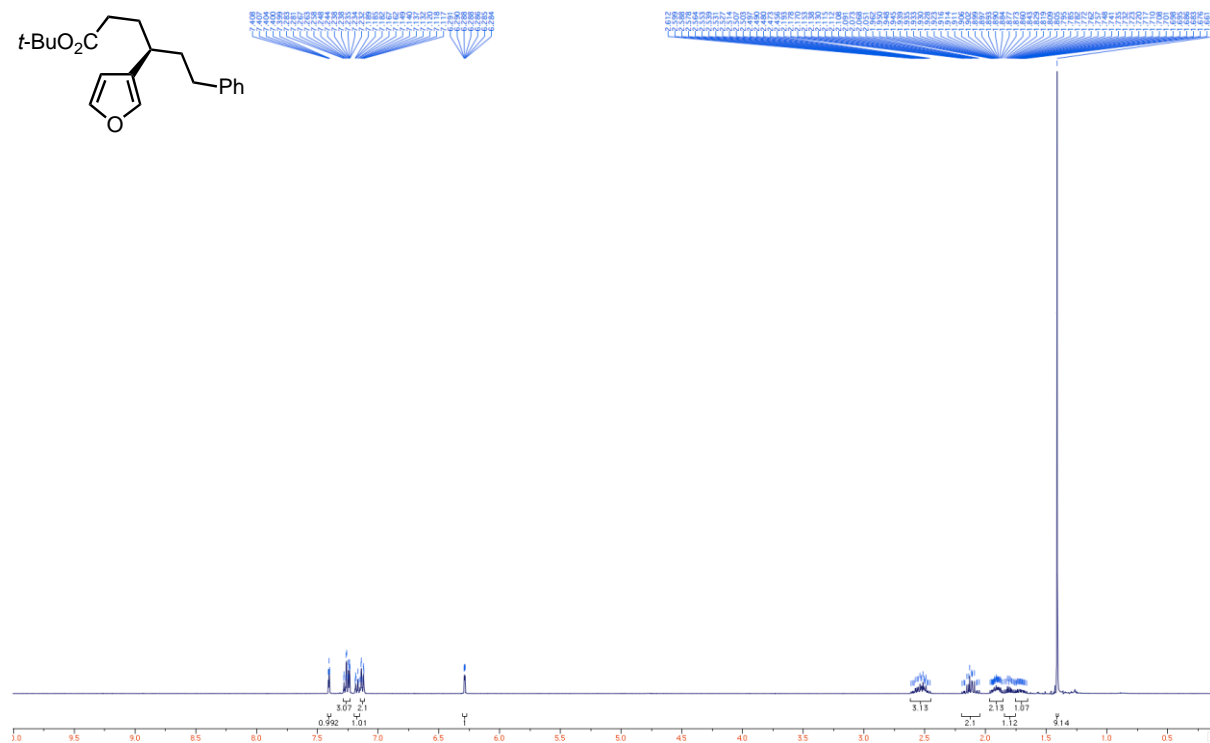

$^{13}\text{C}$  NMR (100 MHz,  $\text{CDCl}_3$ )

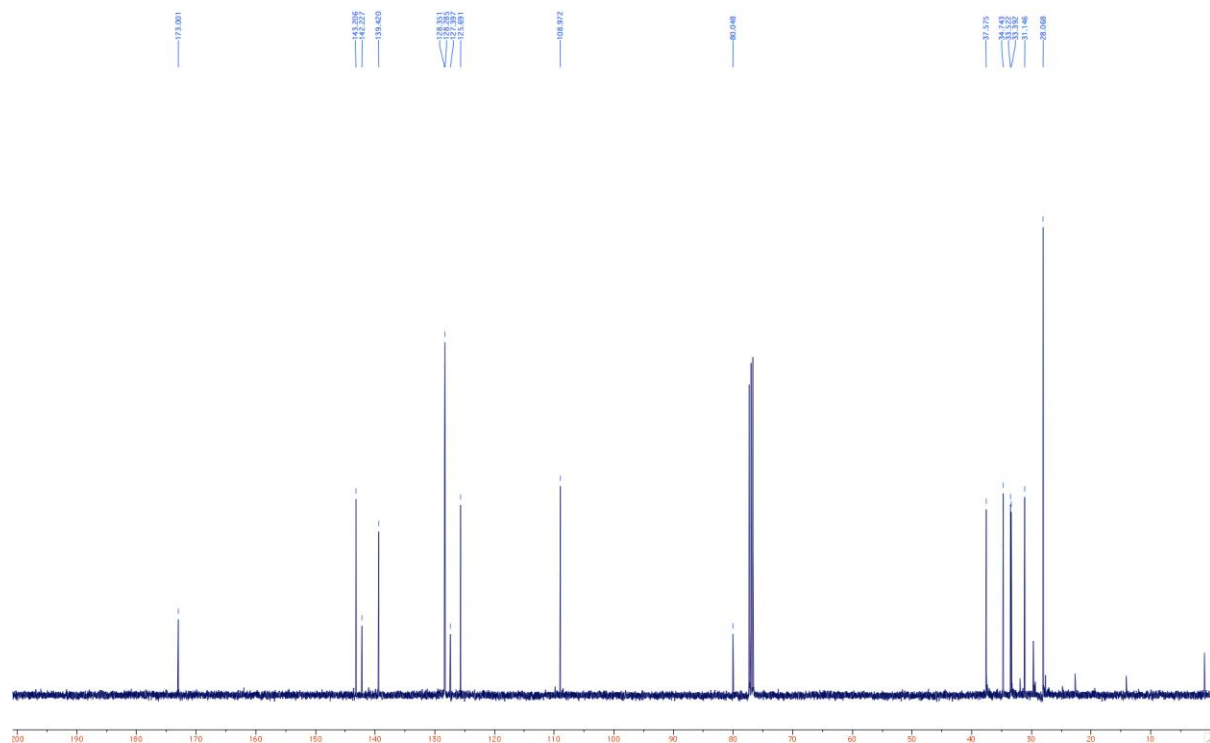

### Chiral HPLC traces: racemic

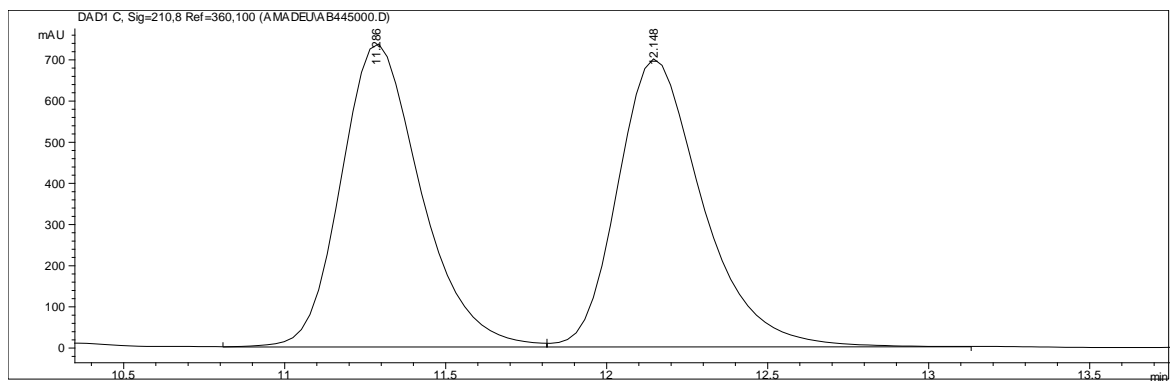

### Chiral HPLC traces: enantioenriched

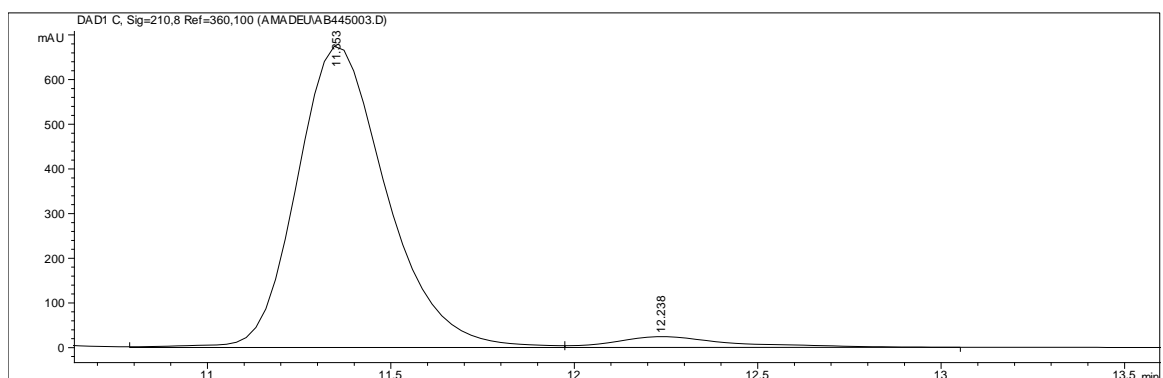

4e

$^1\text{H}$  NMR (400 MHz,  $\text{CDCl}_3$ )

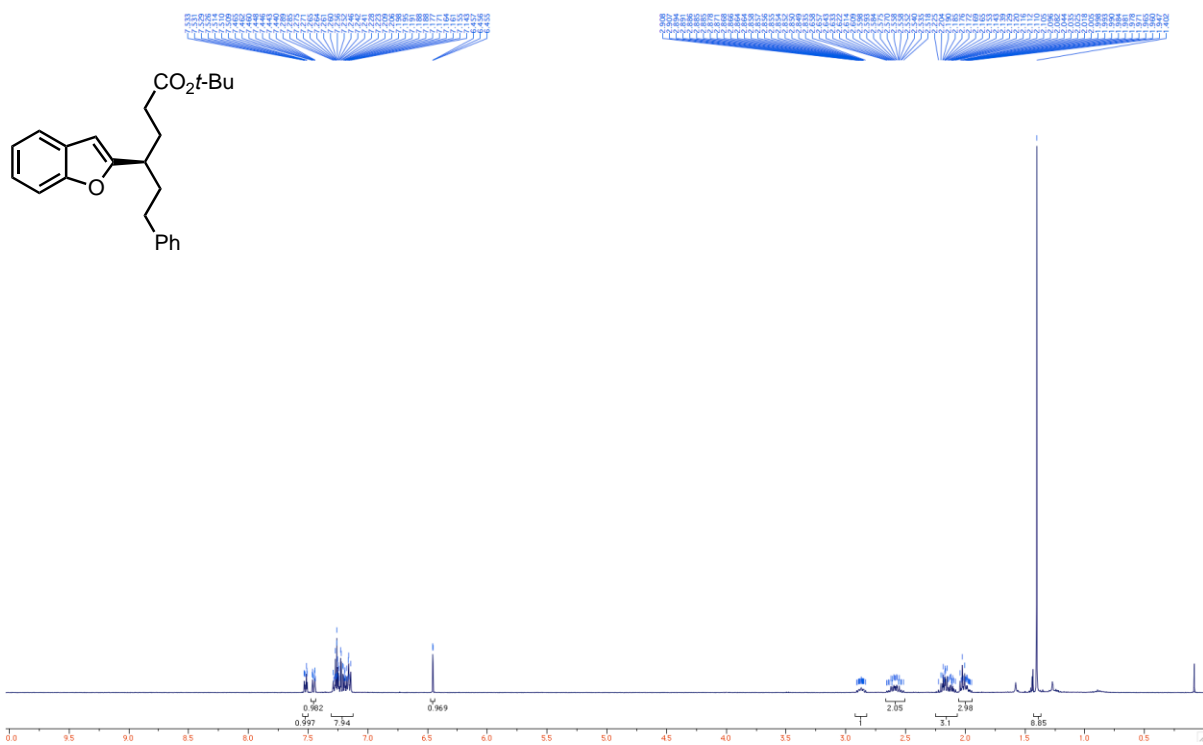

$^{13}\text{C}$  NMR (100 MHz,  $\text{CDCl}_3$ )

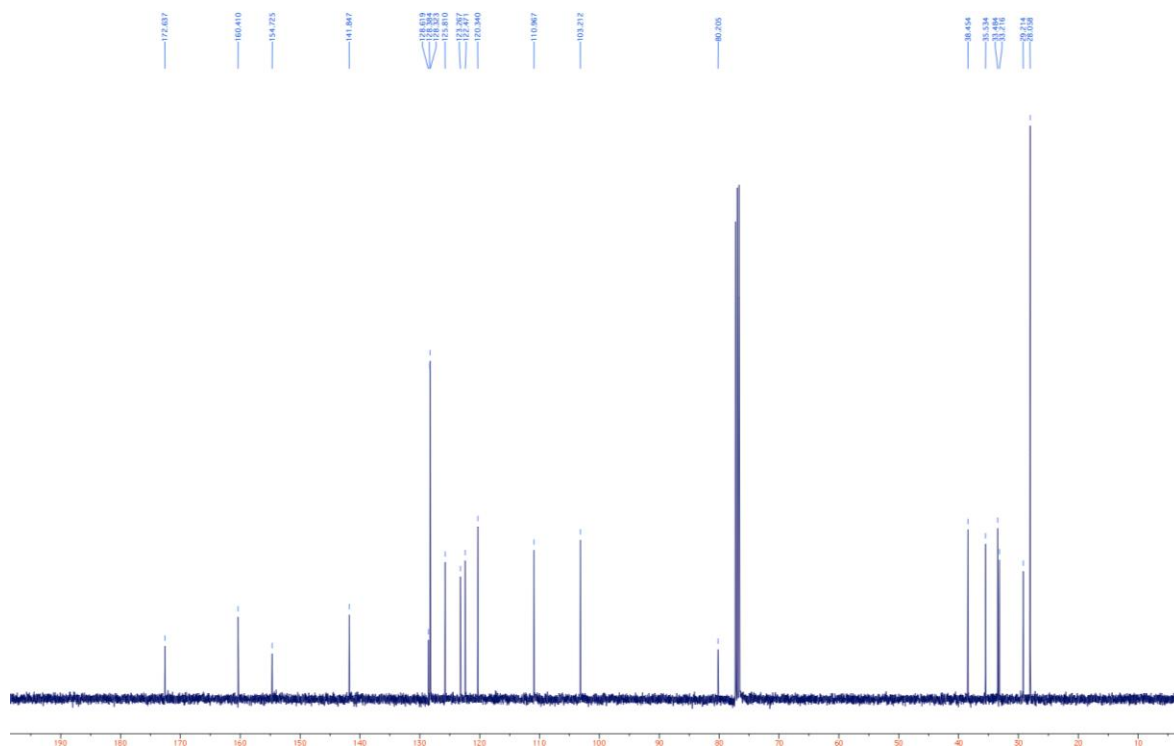

### Chiral SFC traces: racemic

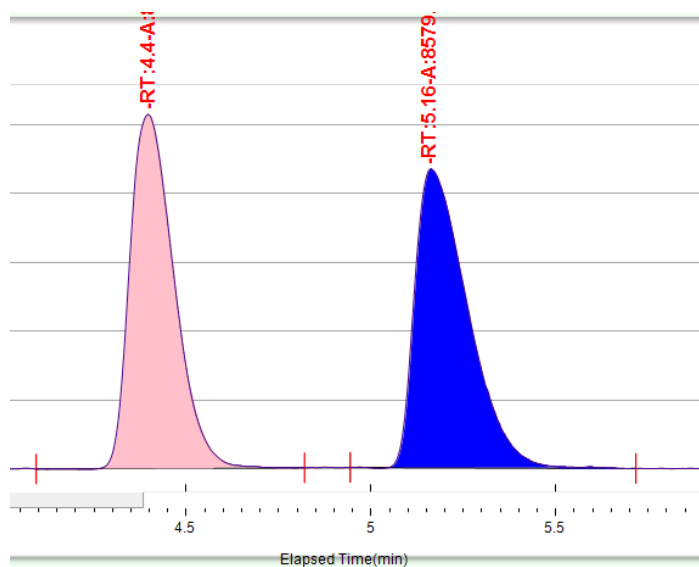

### Chiral SFC traces: enantioenriched

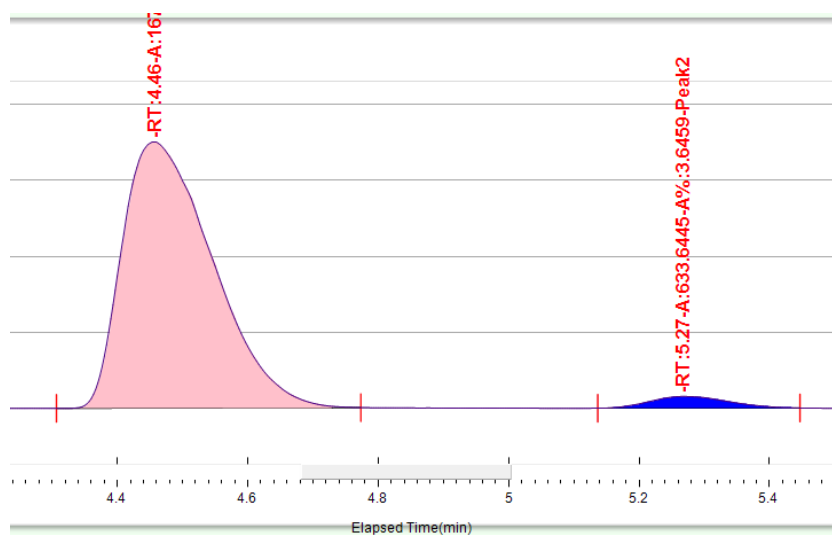

2u

$^1\text{H}$  NMR (400 MHz,  $\text{CDCl}_3$ )

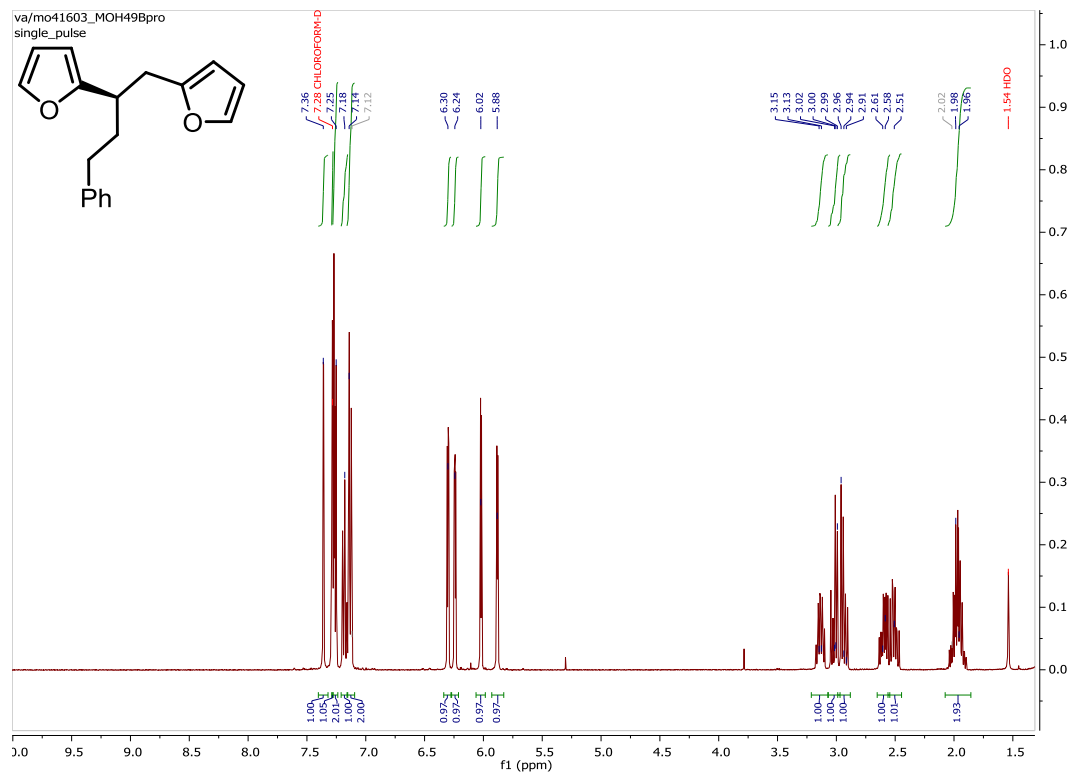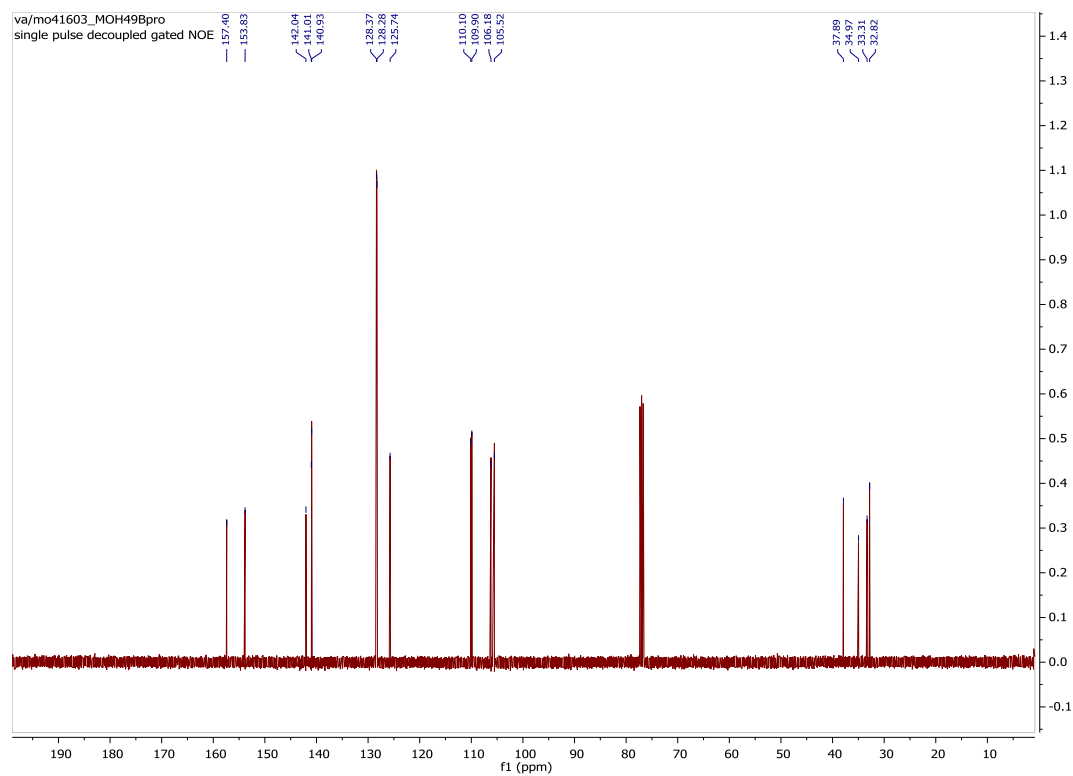

Chiral HPLC traces: racemic

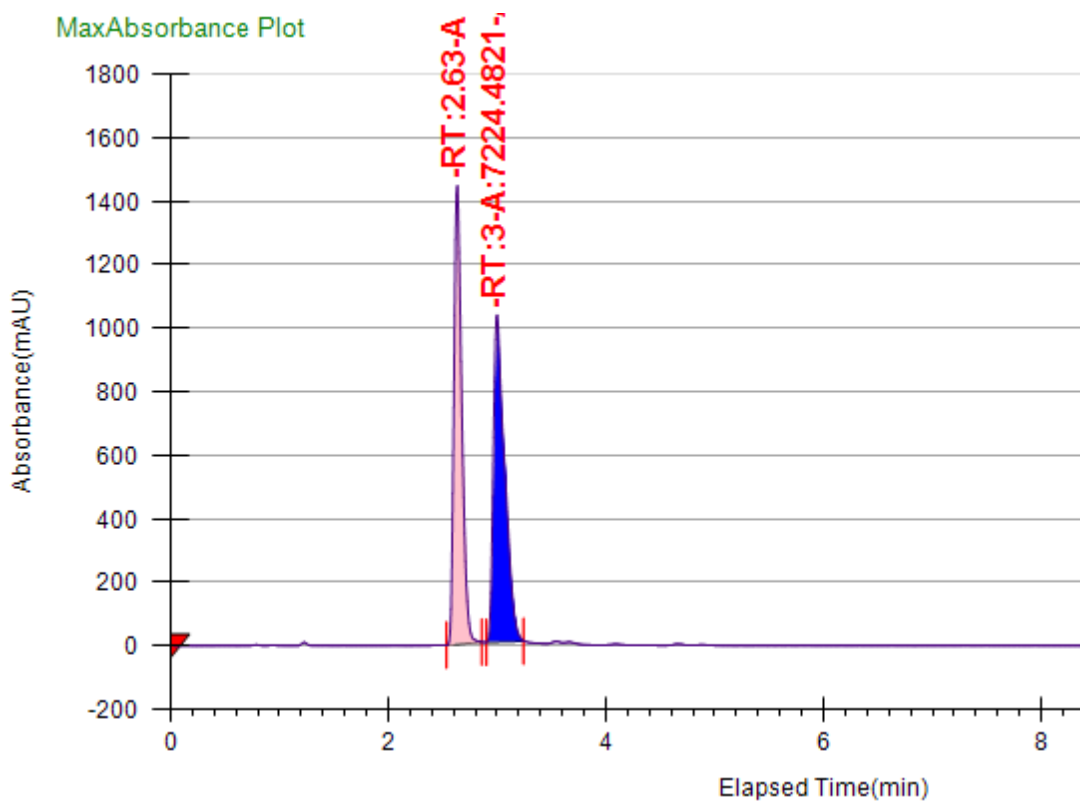

Chiral HPLC traces: enantioenriched

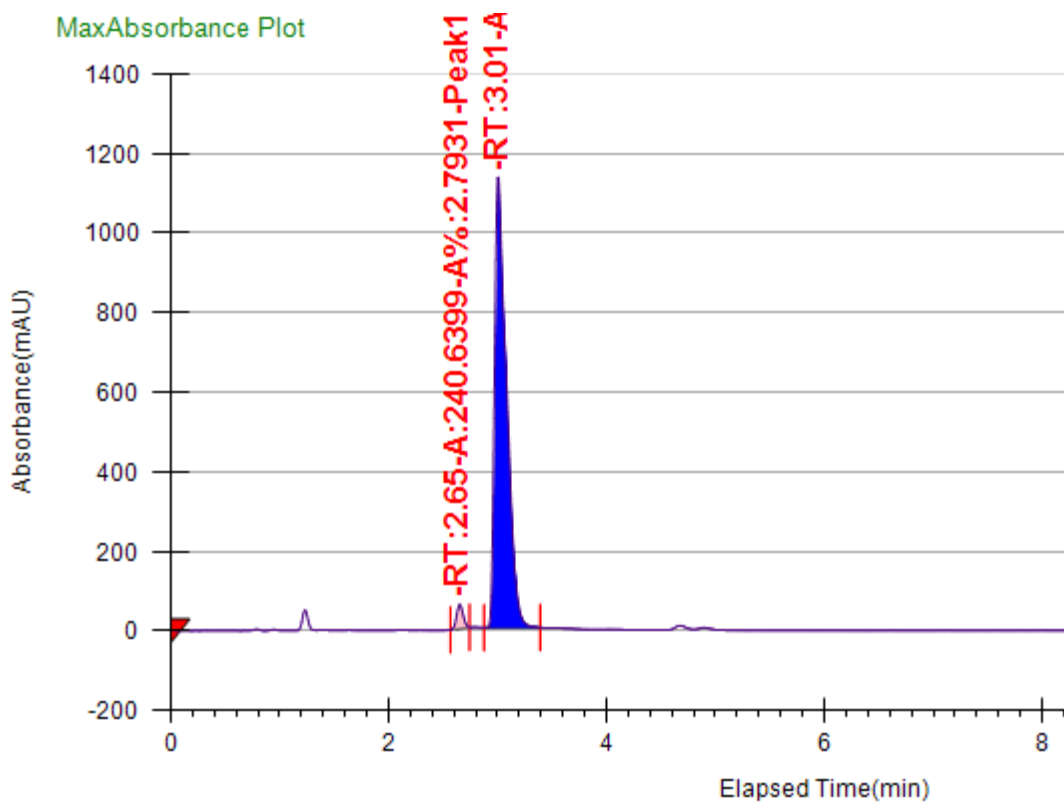



4g

<sup>1</sup>H NMR (400 MHz, CDCl<sub>3</sub>)

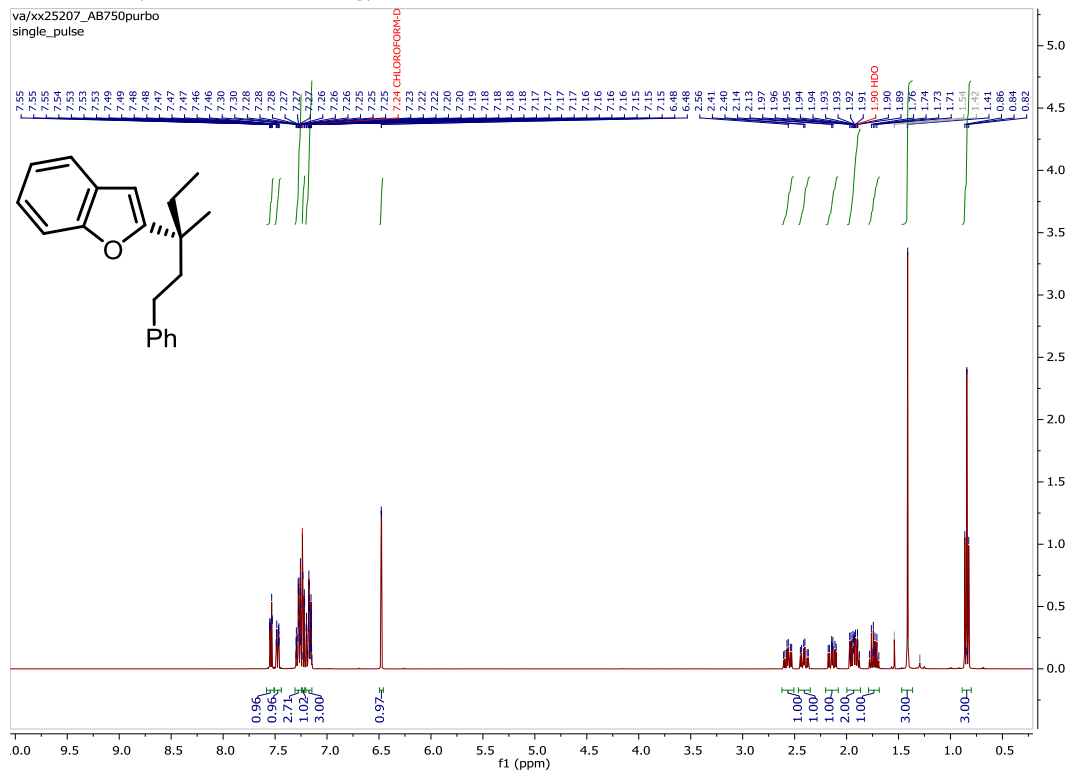

<sup>13</sup>C NMR (100 MHz, CDCl<sub>3</sub>)

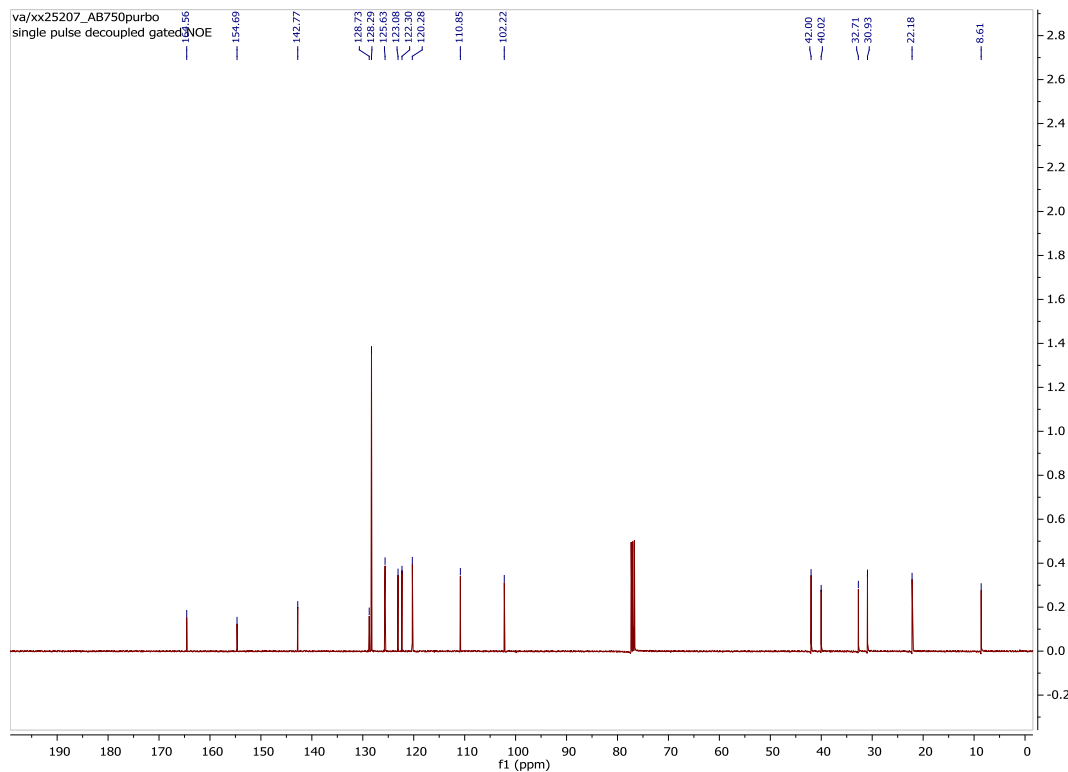

### Chiral HPLC traces: racemic

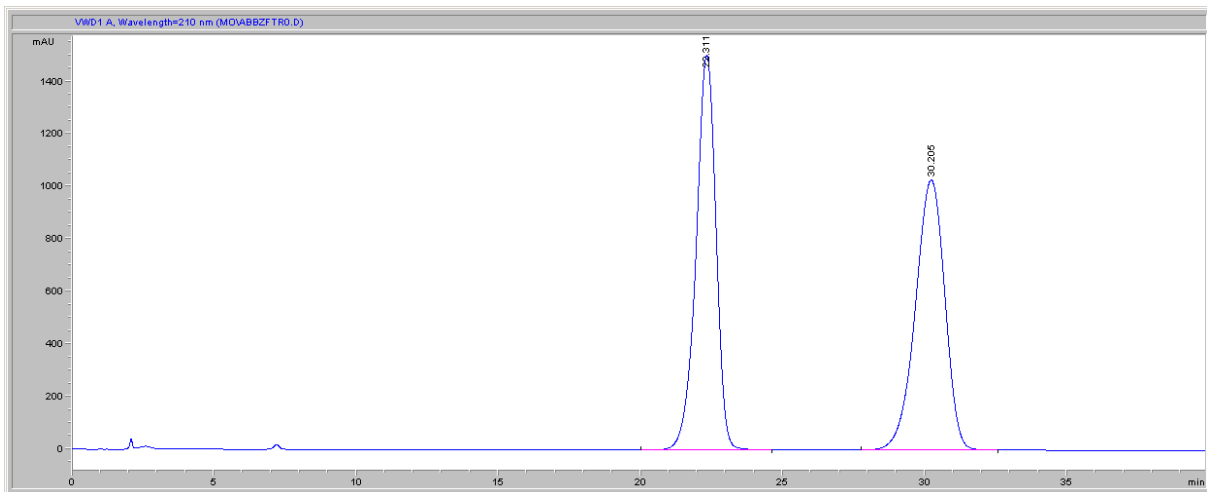

### Chiral HPLC traces: enantioenriched

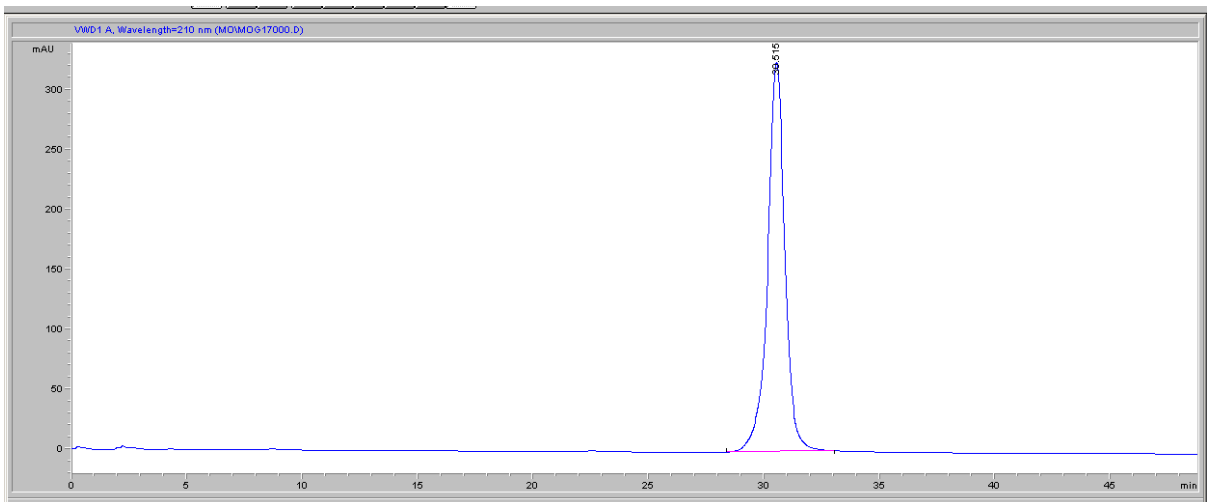

4h

<sup>1</sup>H NMR (400 MHz, CDCl<sub>3</sub>)

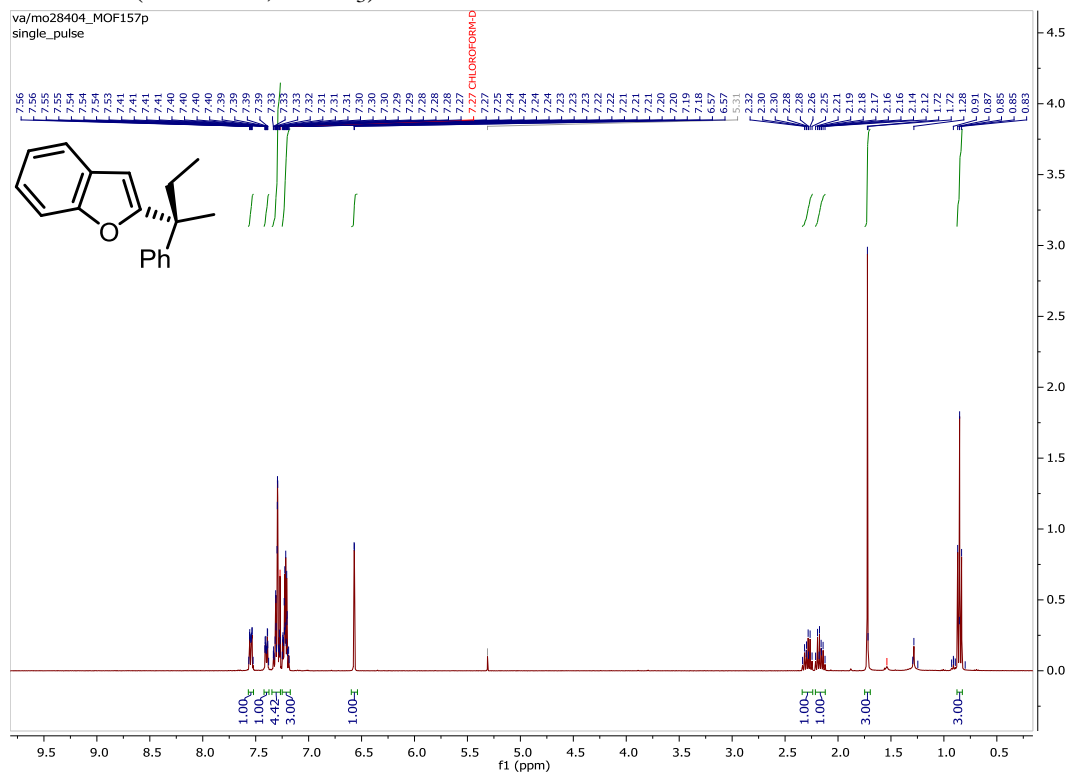

<sup>13</sup>C NMR (100 MHz, CDCl<sub>3</sub>)

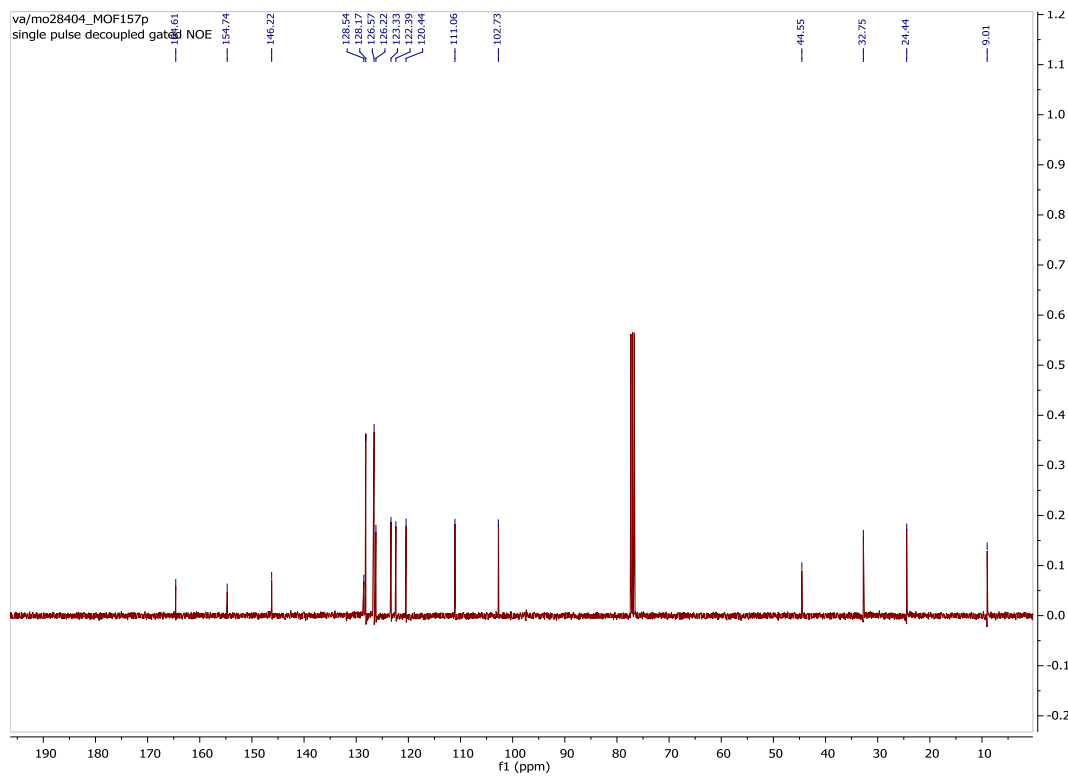

### Chiral HPLC traces: racemic

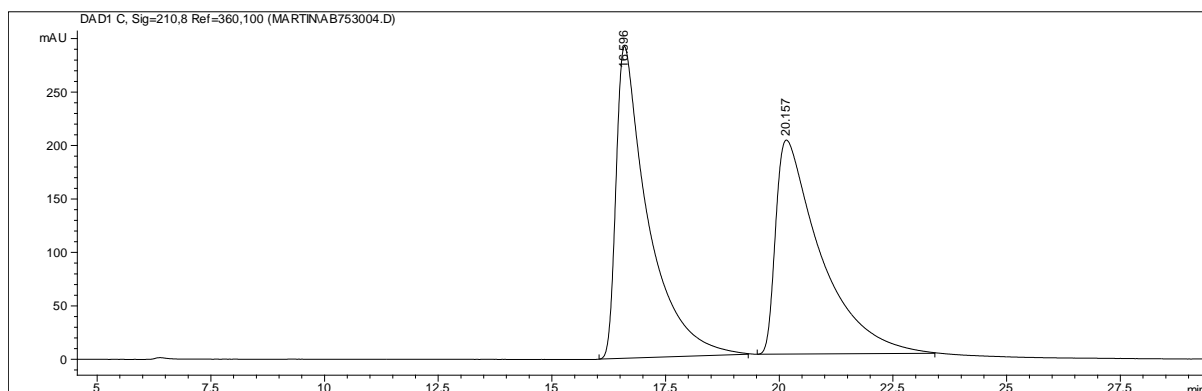

### Chiral HPLC traces: enantioenriched

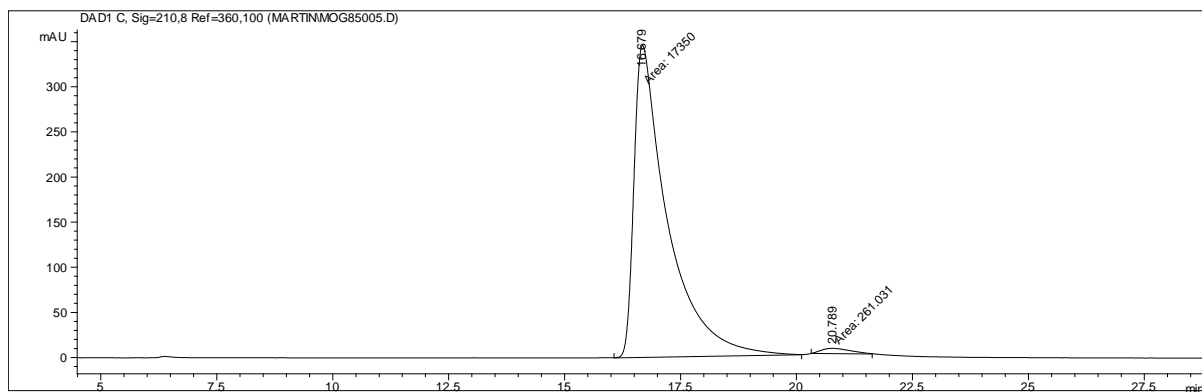

**7a**

$^1\text{H}$  NMR (400 MHz,  $\text{CDCl}_3$ )

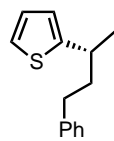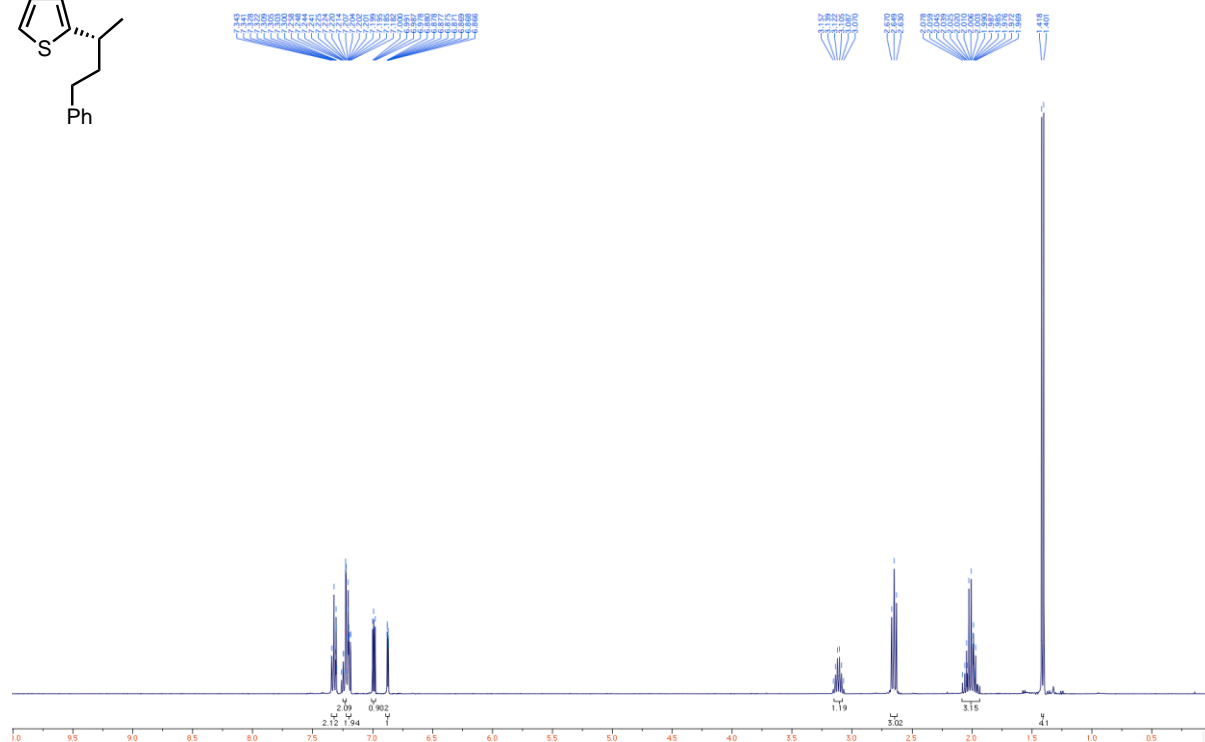

$^{13}\text{C}$  NMR (100 MHz,  $\text{CDCl}_3$ )

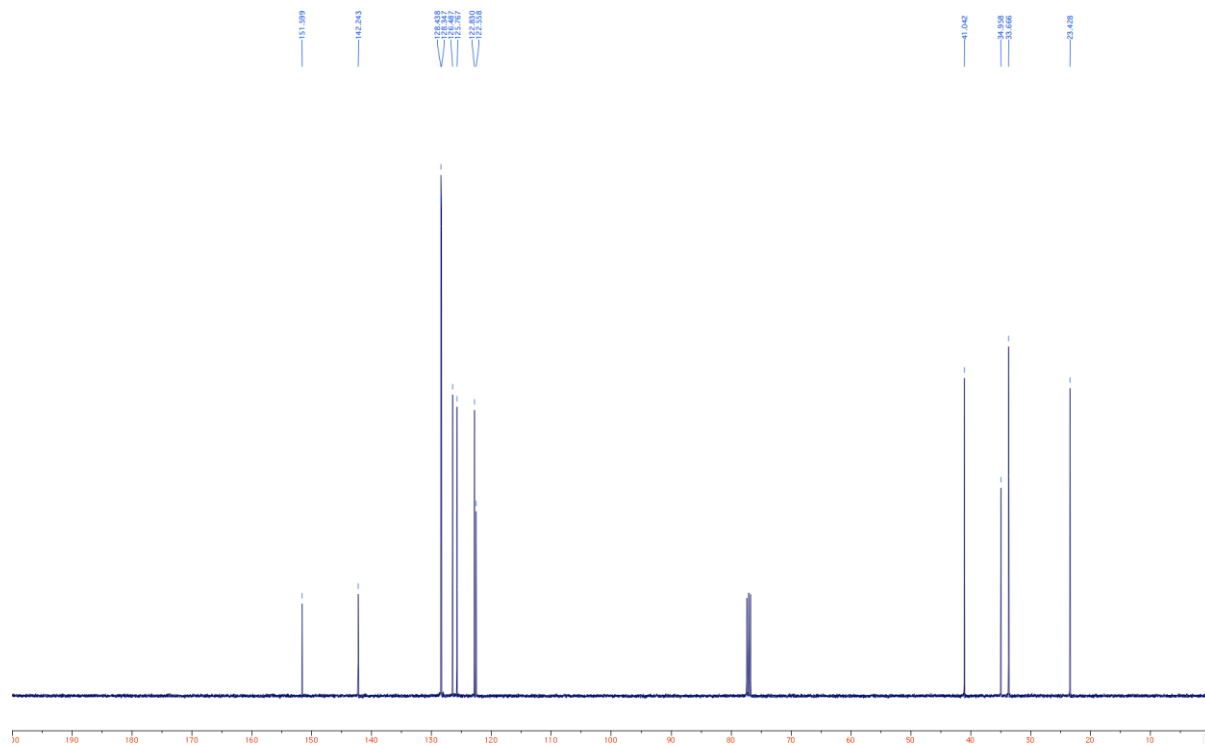

### Chiral HPLC traces: racemic

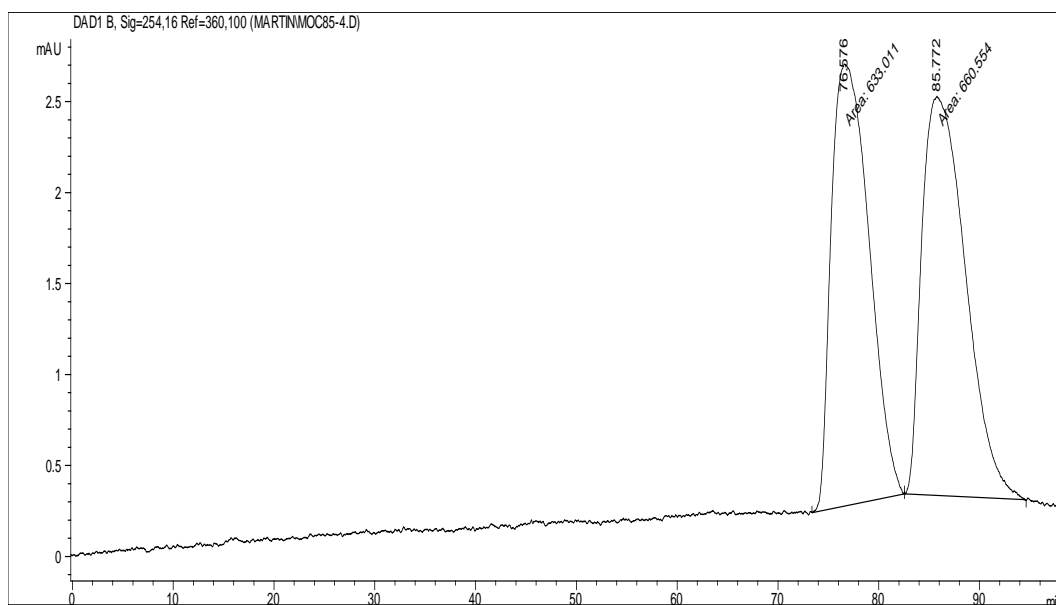

### Chiral HPLC traces: enantioenriched

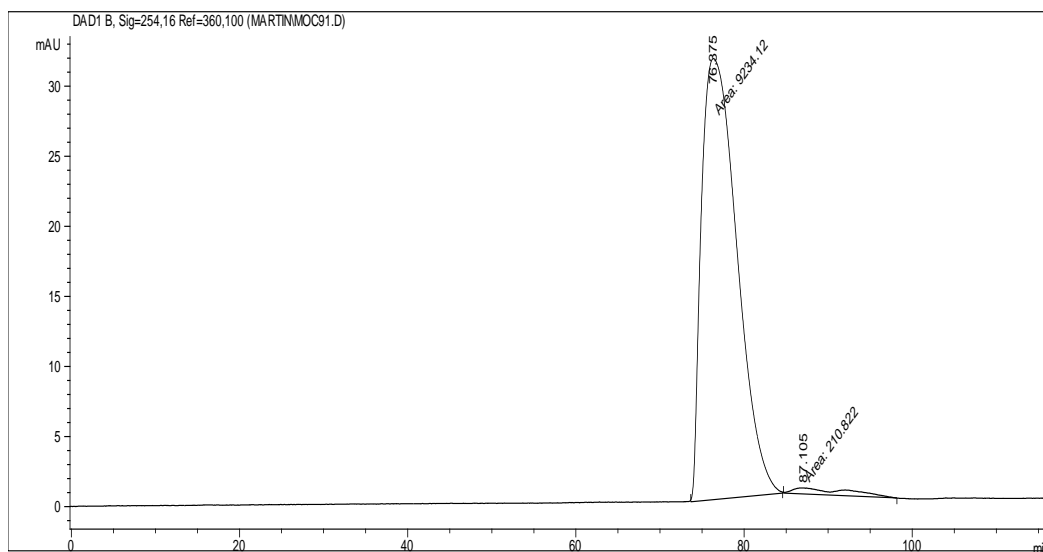



8b

<sup>1</sup>H NMR (400 MHz, CDCl<sub>3</sub>)

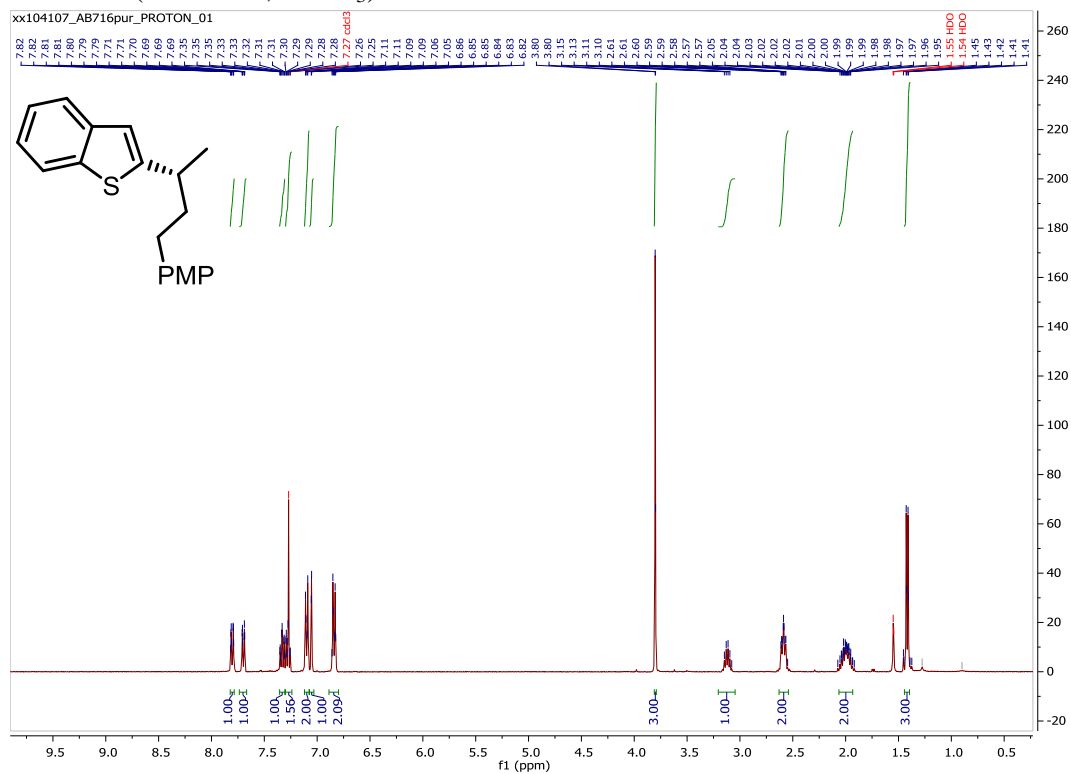

<sup>13</sup>C NMR (100 MHz, CDCl<sub>3</sub>)

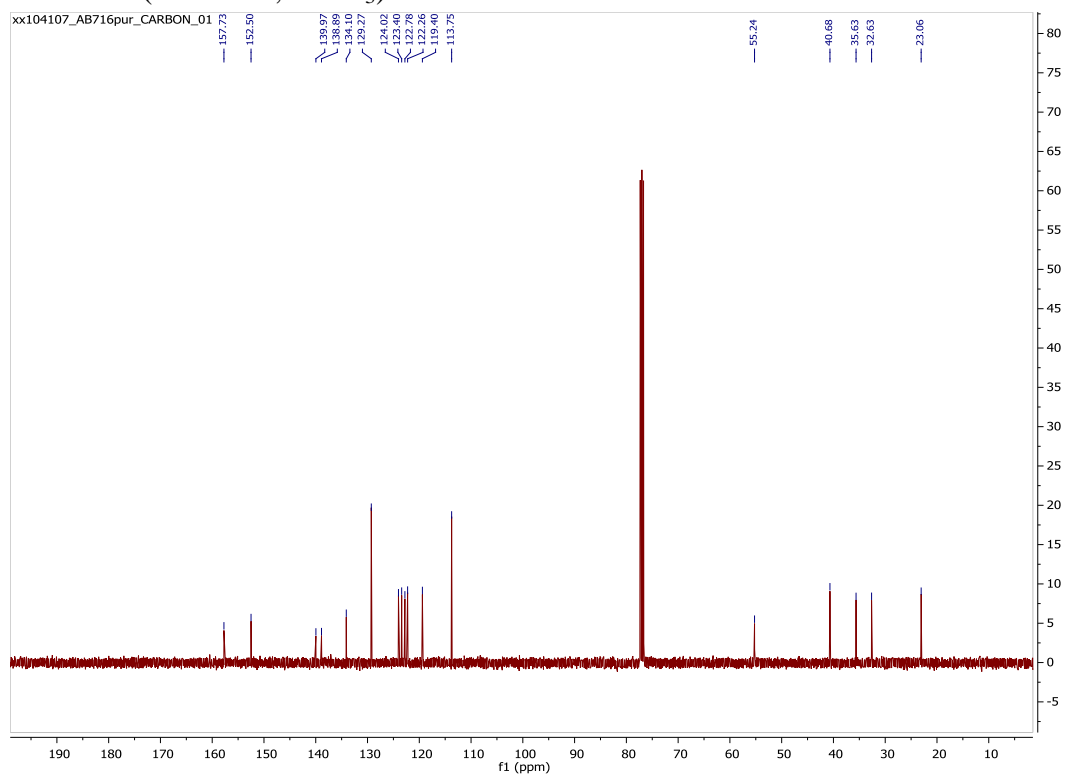



### Chiral SFC traces: racemic

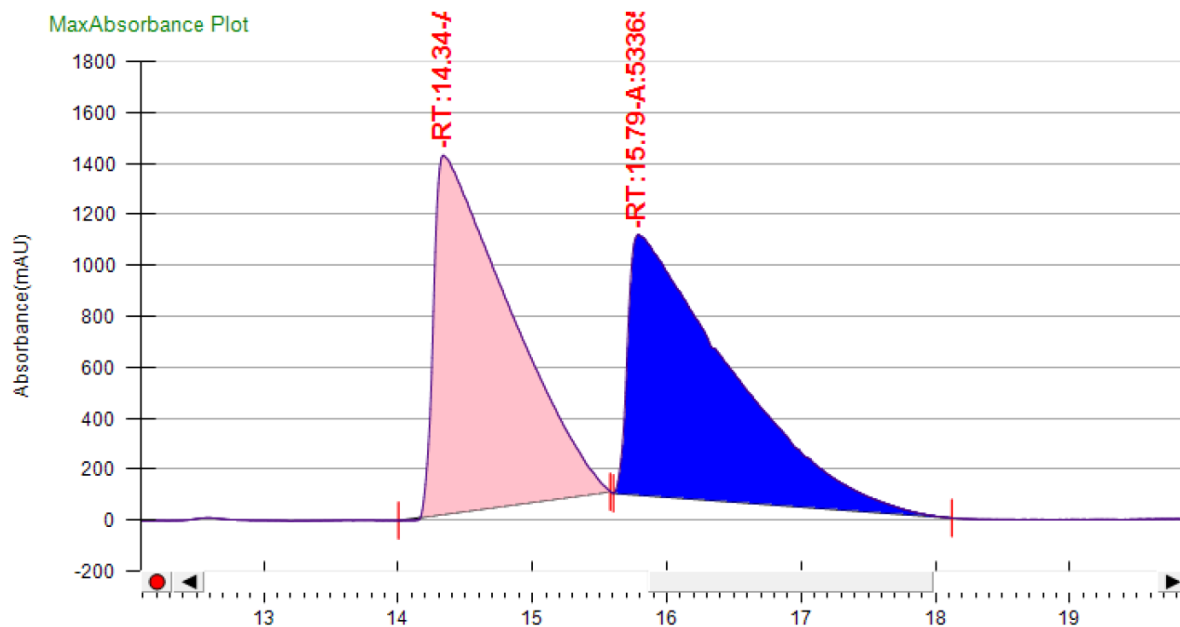

### Chiral SFC traces: enantioenriched

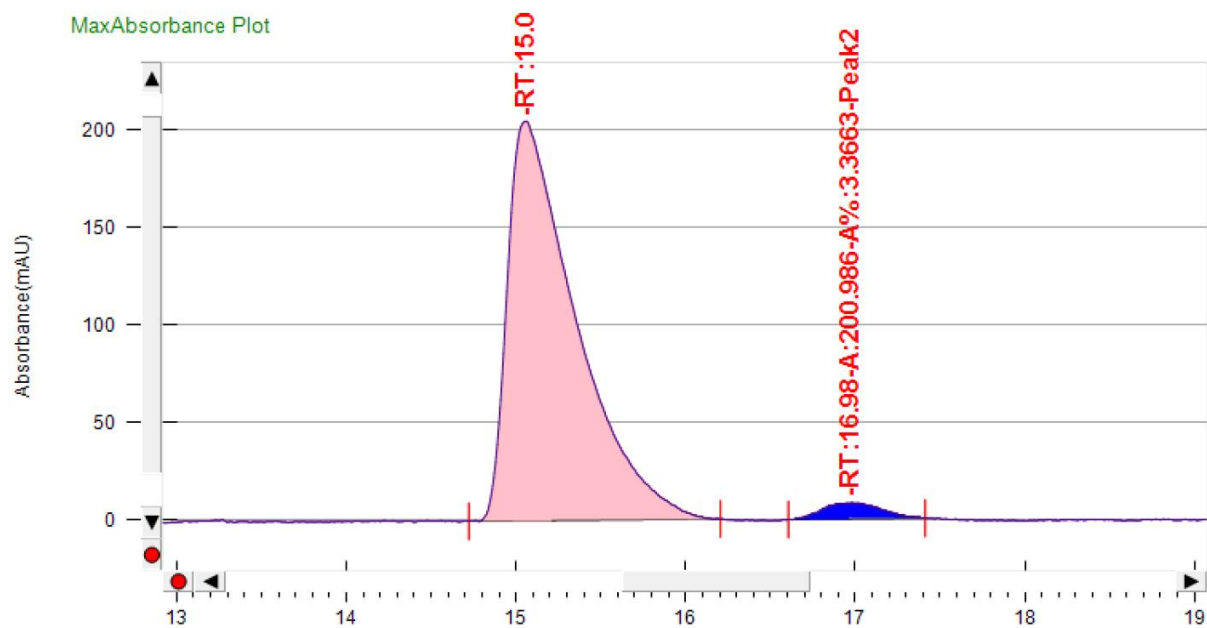

5b

<sup>1</sup>H NMR (400 MHz, CDCl<sub>3</sub>)

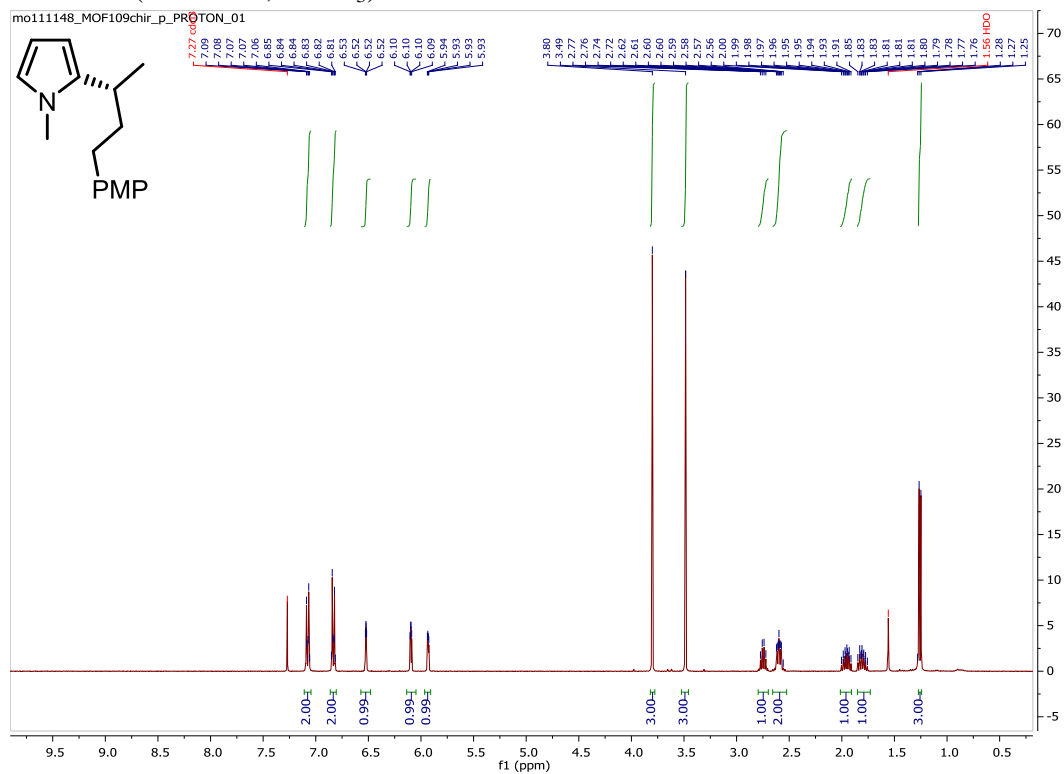

<sup>13</sup>C NMR (100 MHz, CDCl<sub>3</sub>)

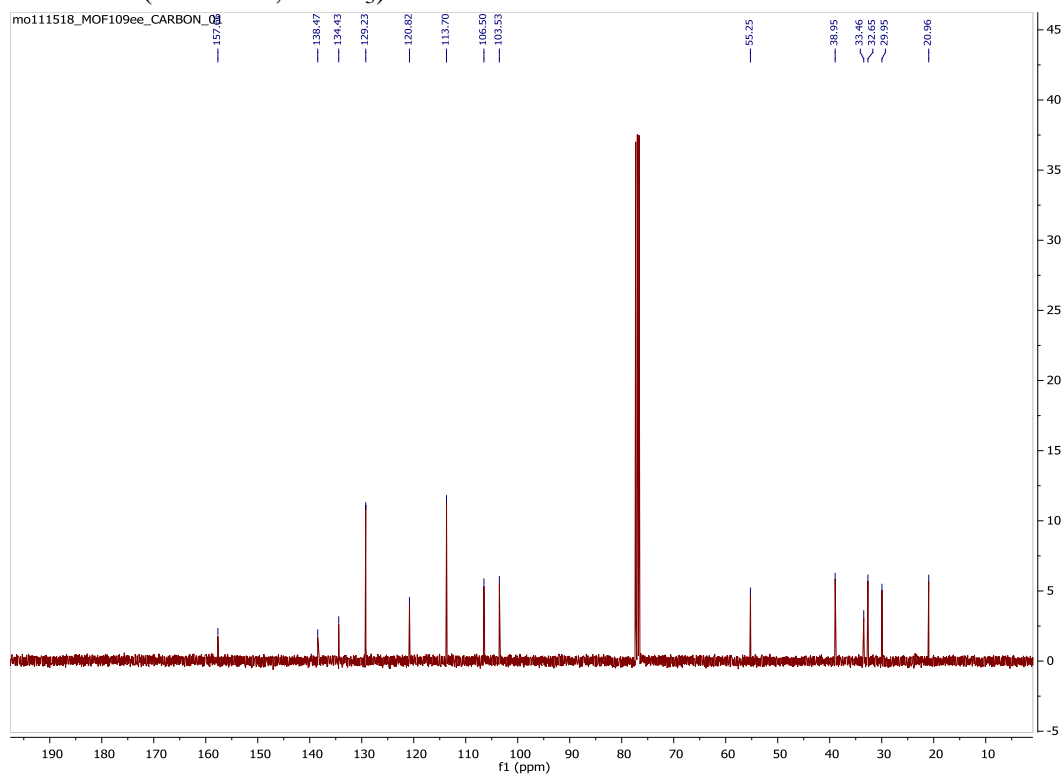

### Chiral HPLC traces: racemic

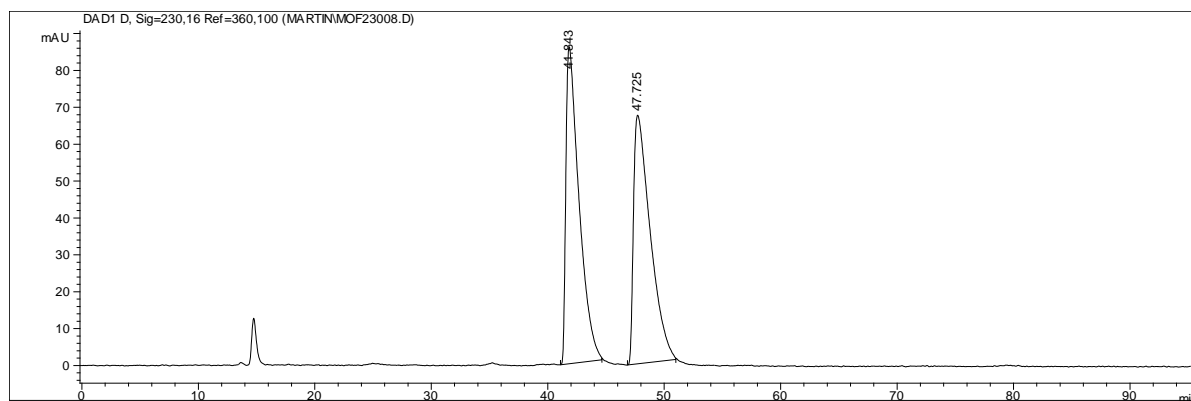

### Chiral HPLC traces: enantioenriched

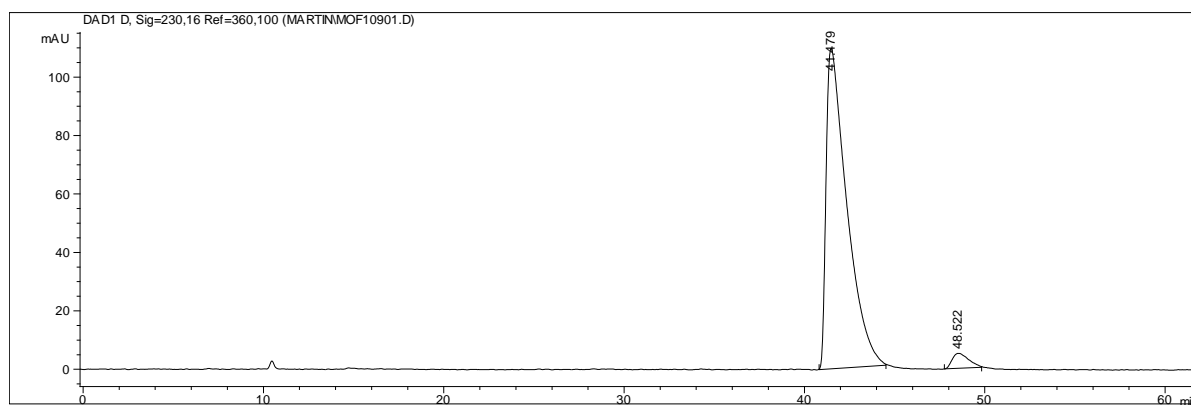

**6a**

$^1\text{H}$  NMR (400 MHz,  $\text{CDCl}_3$ )

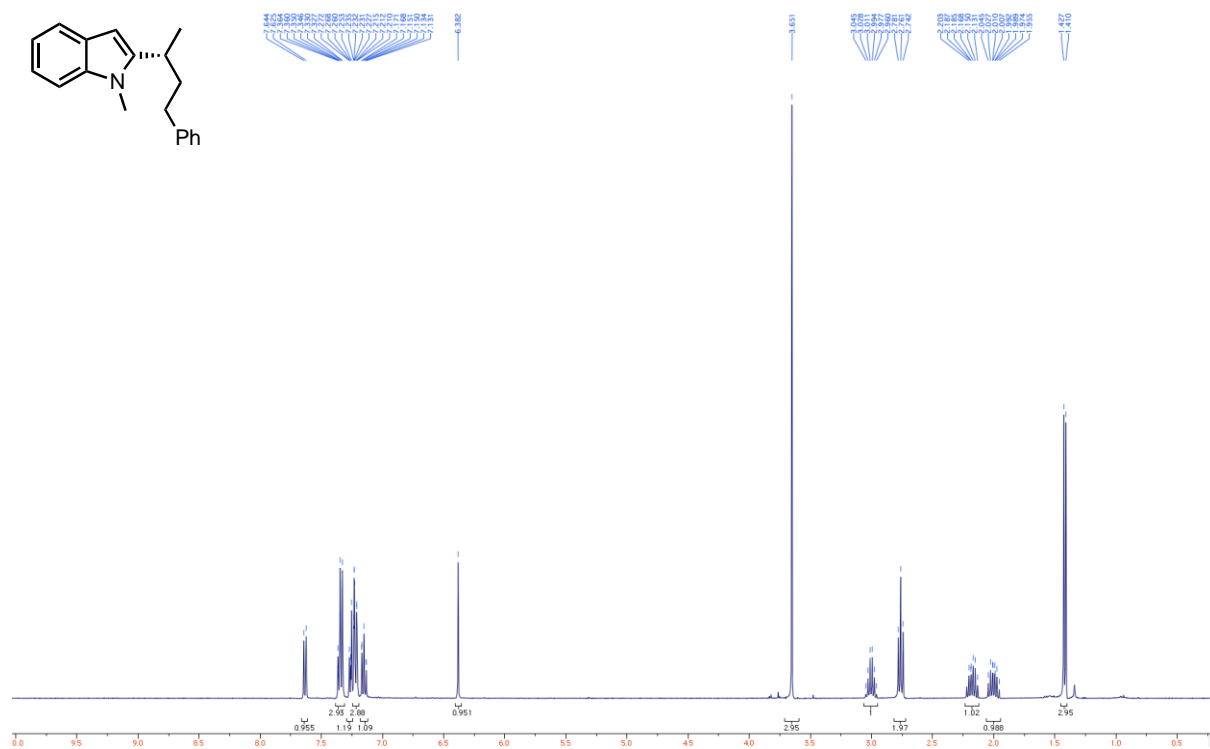

$^{13}\text{C}$  NMR (100 MHz,  $\text{CDCl}_3$ )

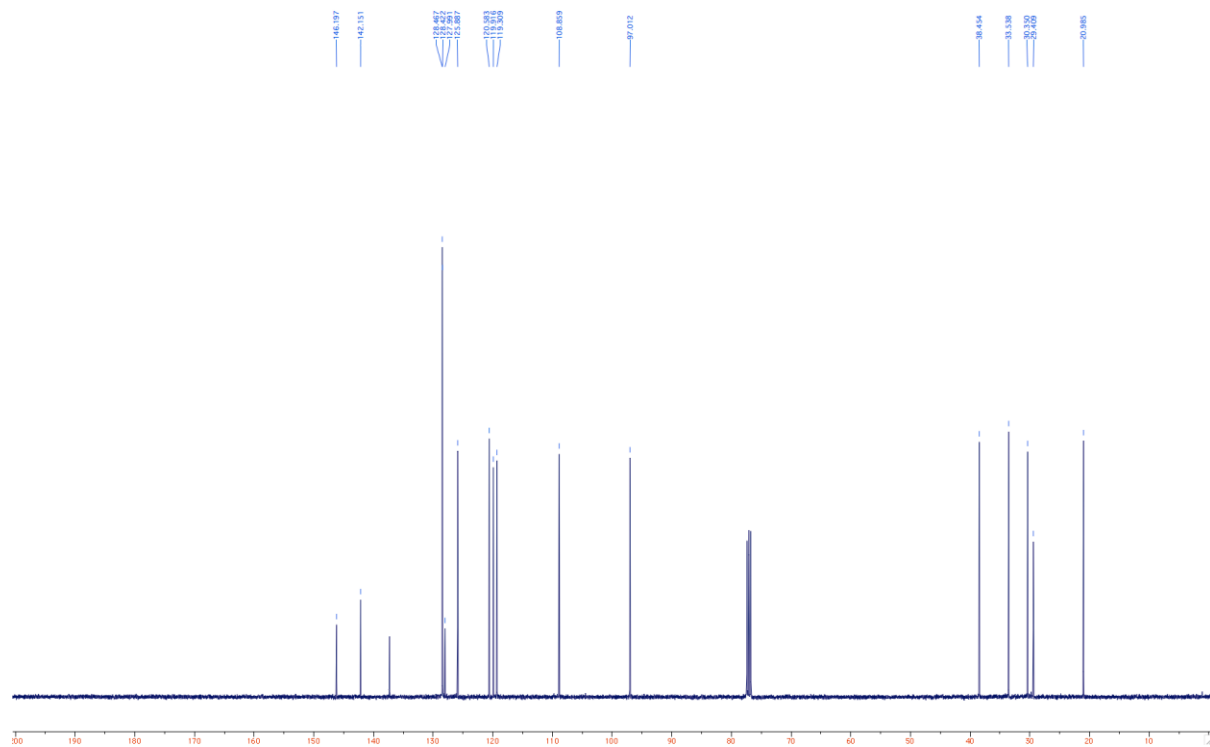

### Chiral SFC traces: racemic

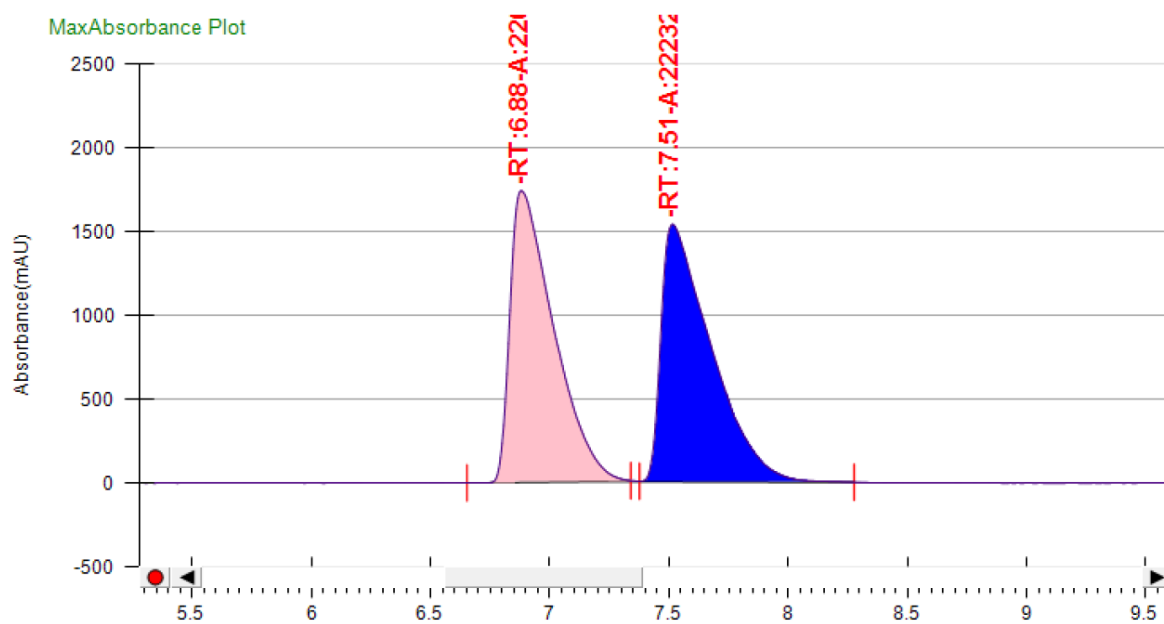

### Chiral SFC traces: enantioenriched

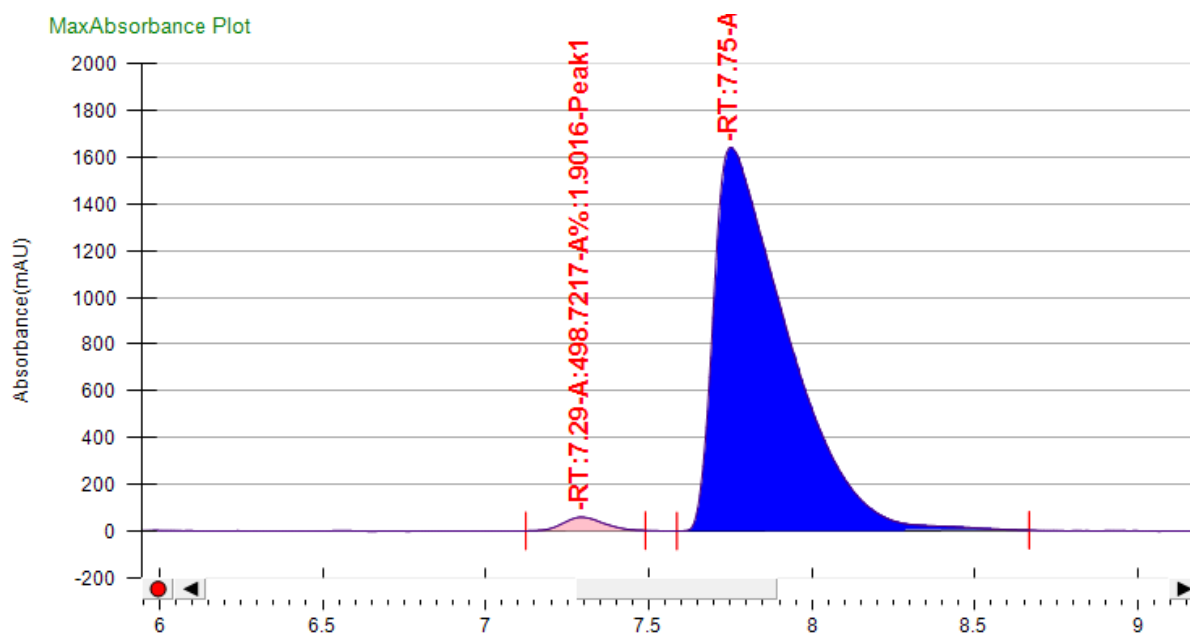

6q

$^1\text{H}$  NMR (400 MHz,  $\text{CDCl}_3$ )

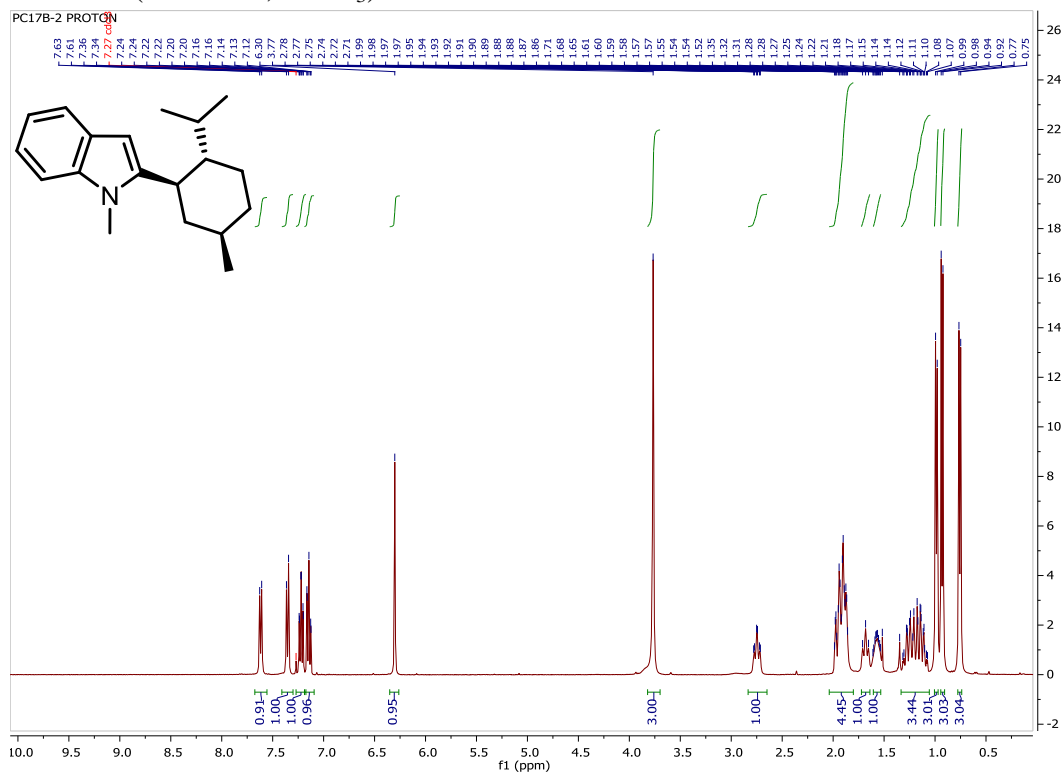

$^{13}\text{C}$  NMR (100 MHz,  $\text{CDCl}_3$ )

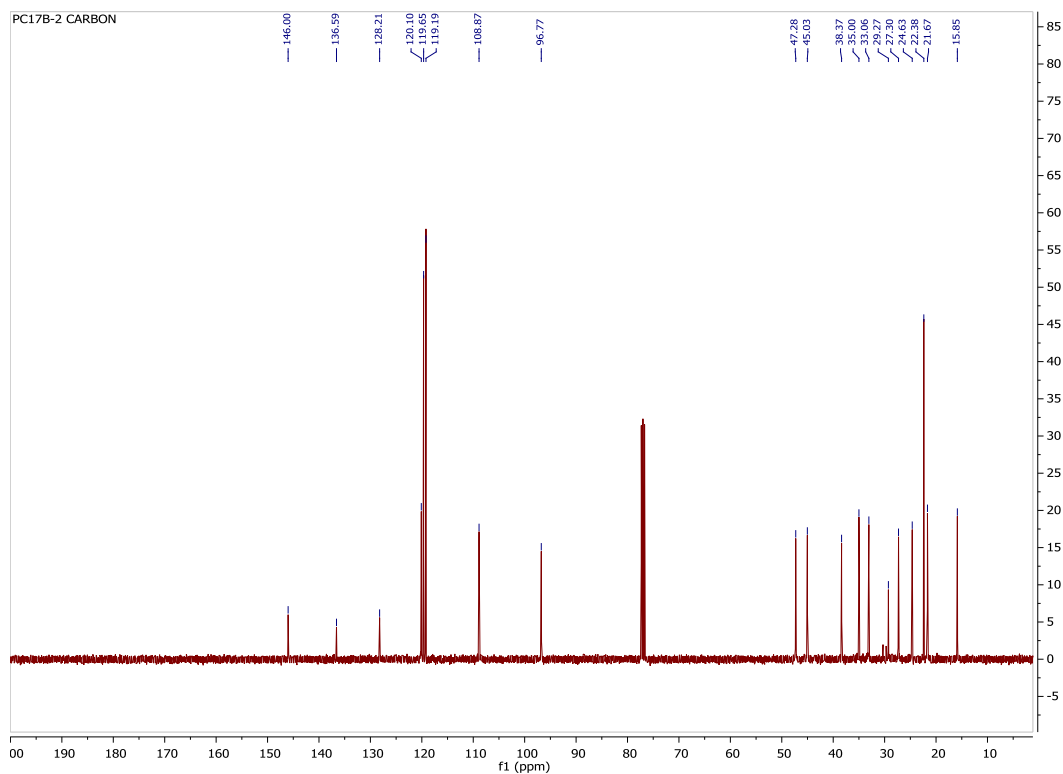

6p

$^1\text{H}$  NMR (400 MHz,  $\text{CDCl}_3$ )

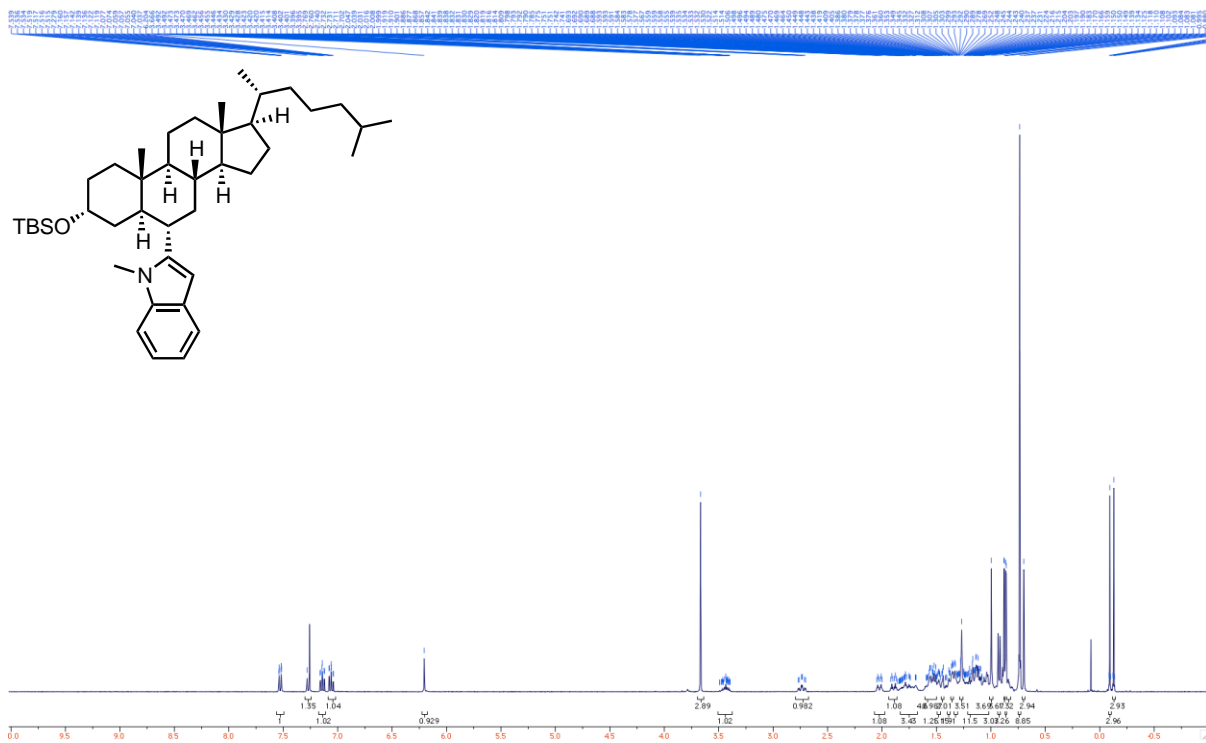

$^{13}\text{C}$  NMR (100 MHz,  $\text{CDCl}_3$ )

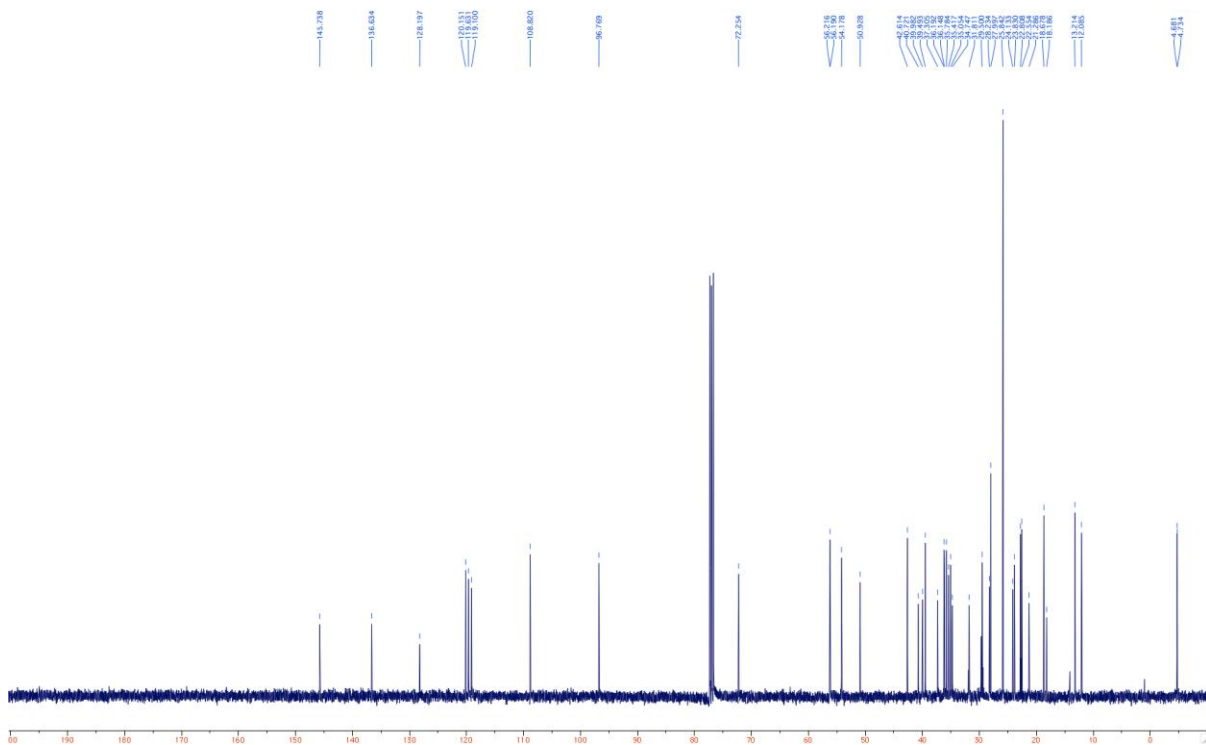

**9a**

$^1\text{H}$  NMR (400 MHz,  $\text{CDCl}_3$ )

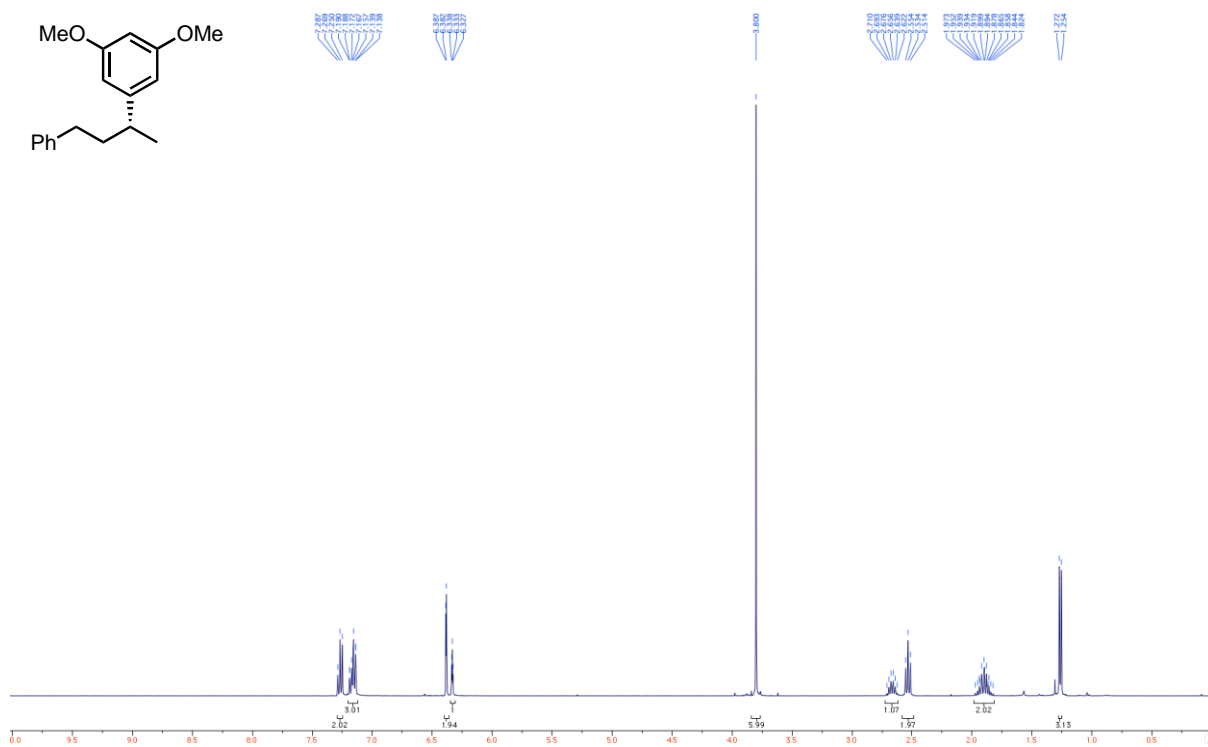

$^{13}\text{C}$  NMR (100 MHz,  $\text{CDCl}_3$ )

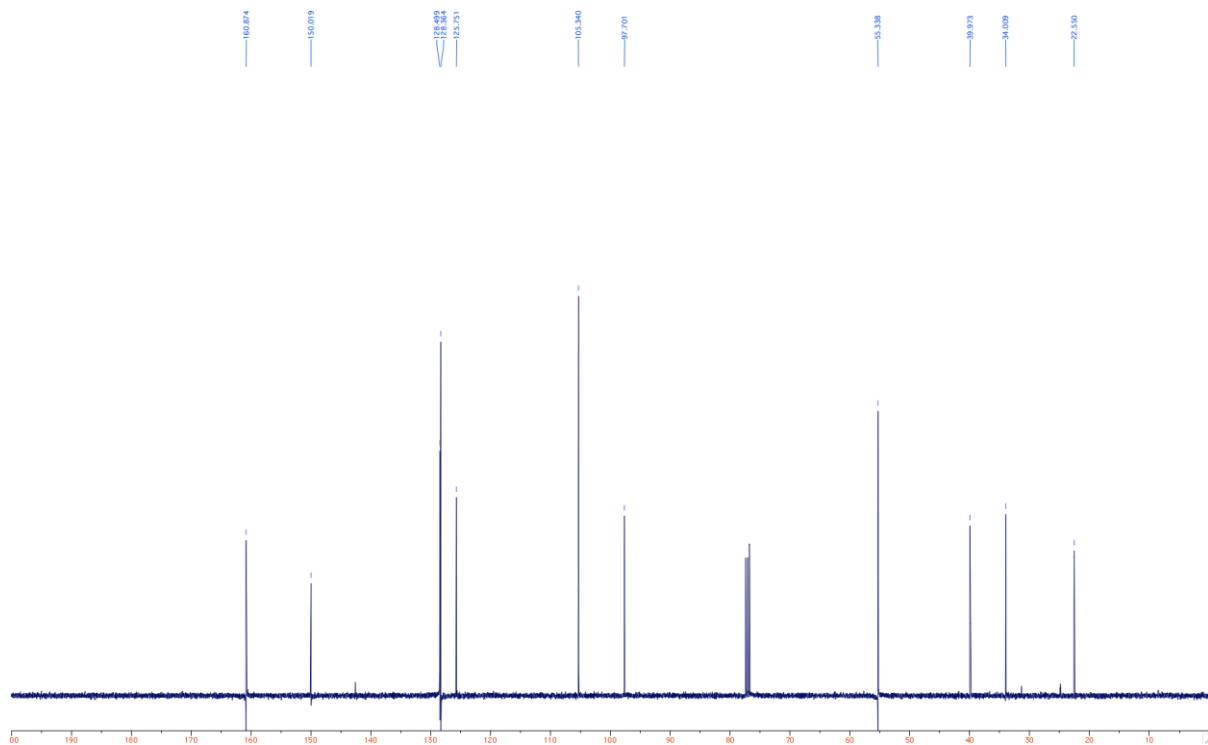



Chiral SFC traces: racemic

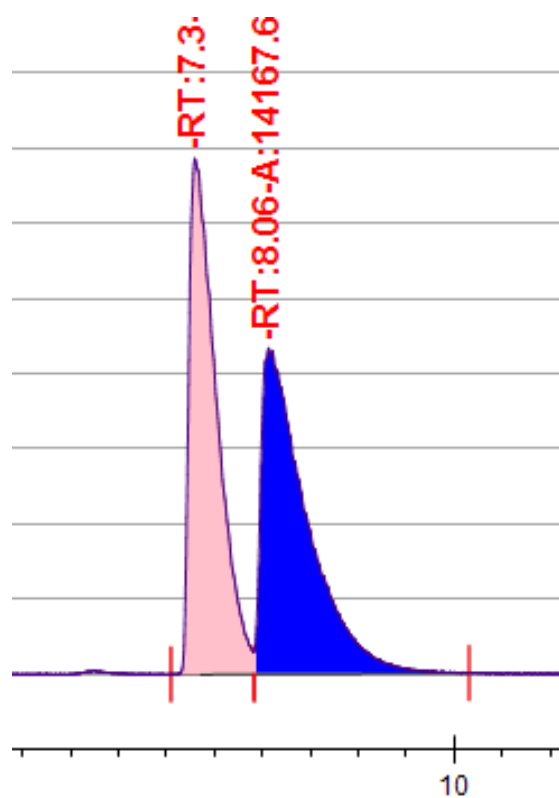

Chiral SFC traces: enantioenriched

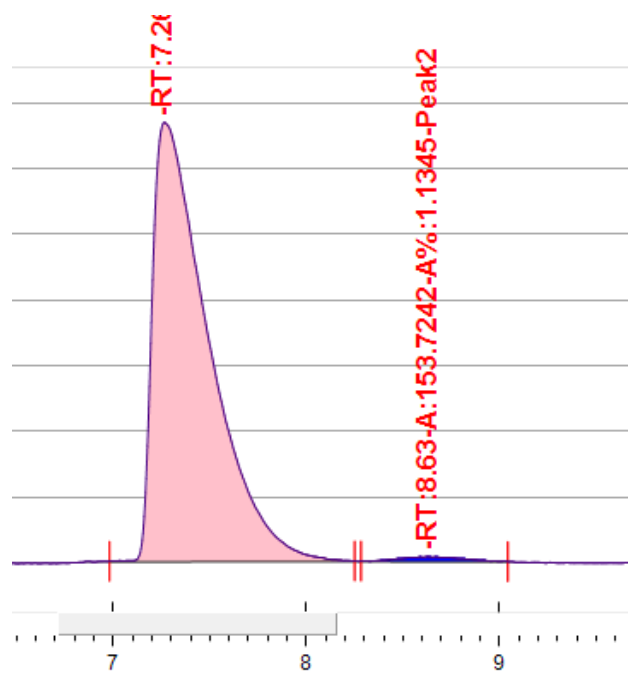

91

<sup>1</sup>H NMR (400 MHz, CDCl<sub>3</sub>)

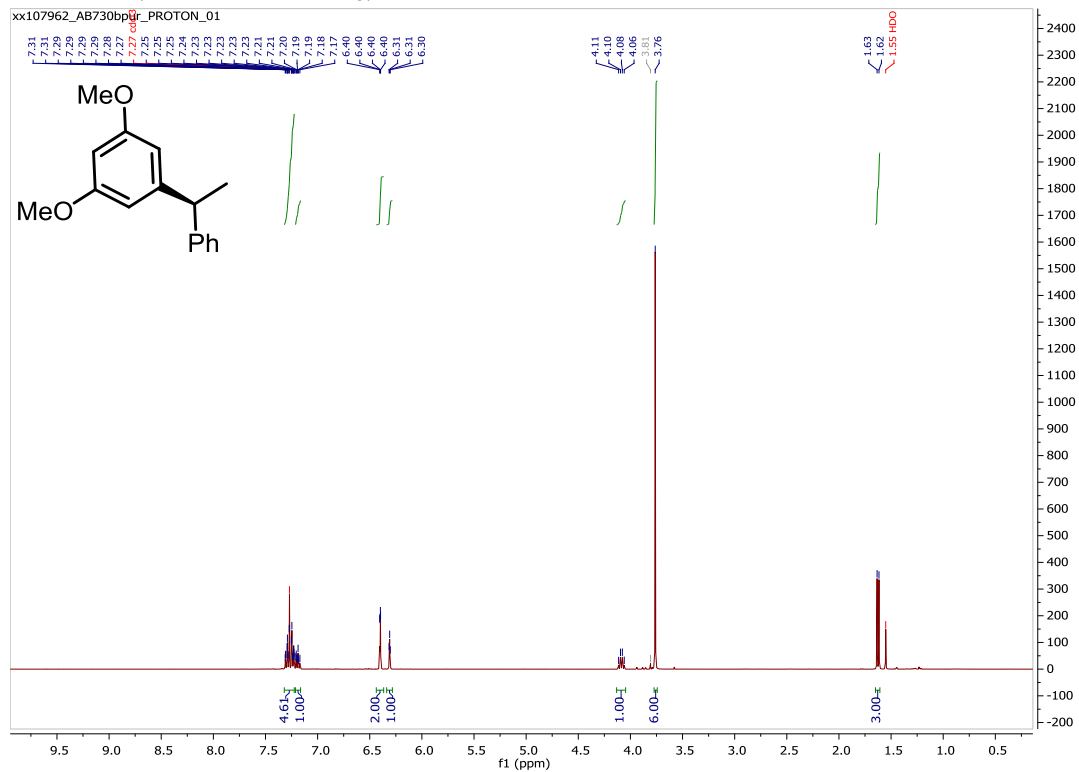

<sup>13</sup>C NMR (100 MHz, CDCl<sub>3</sub>)

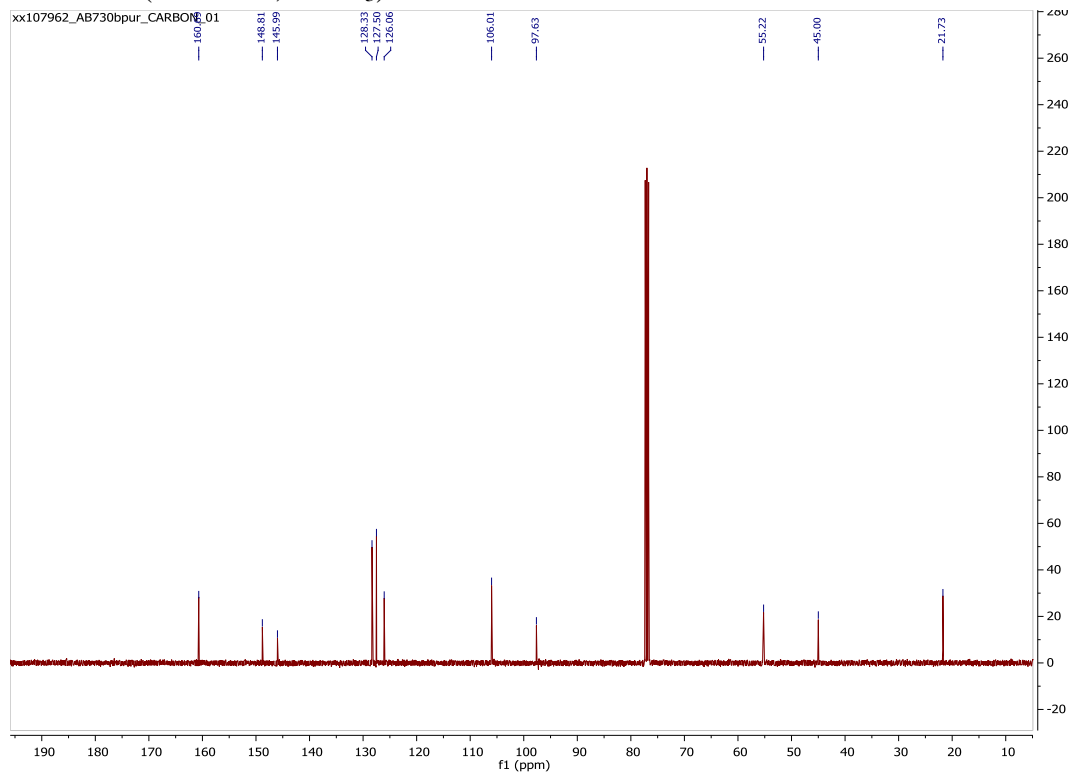

### Chiral HPLC traces: racemic

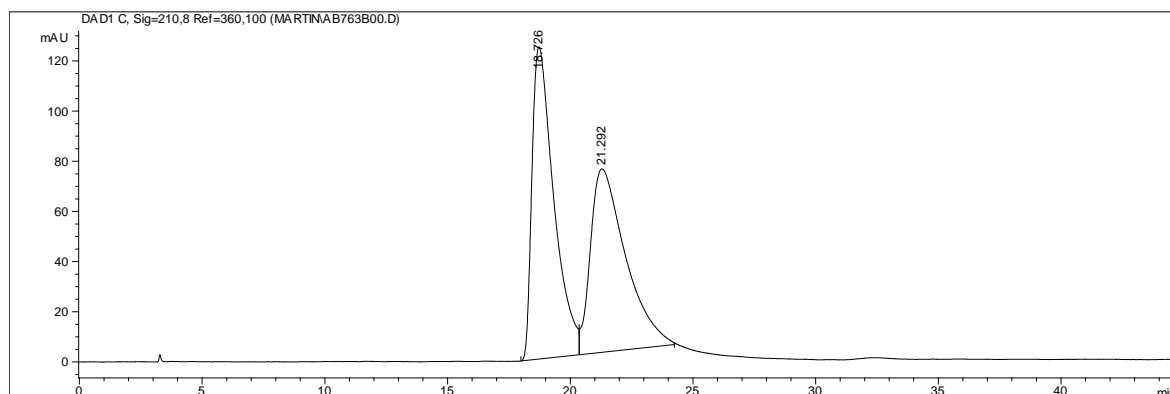

### Chiral HPLC traces: enantioenriched

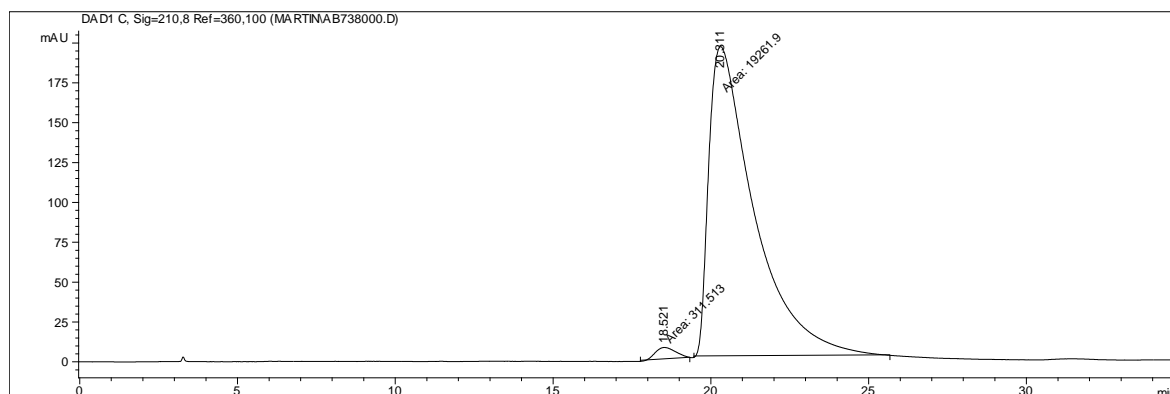

9q

<sup>1</sup>H NMR (400 MHz, CDCl<sub>3</sub>)

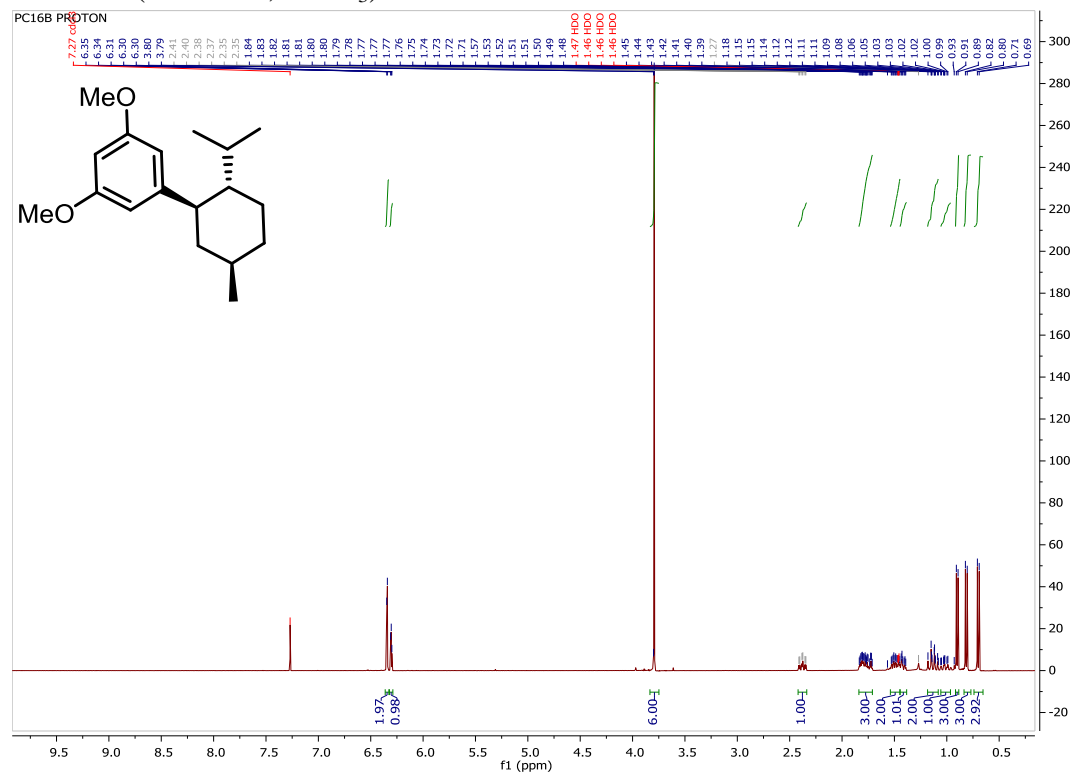

<sup>13</sup>C NMR (100 MHz, CDCl<sub>3</sub>)

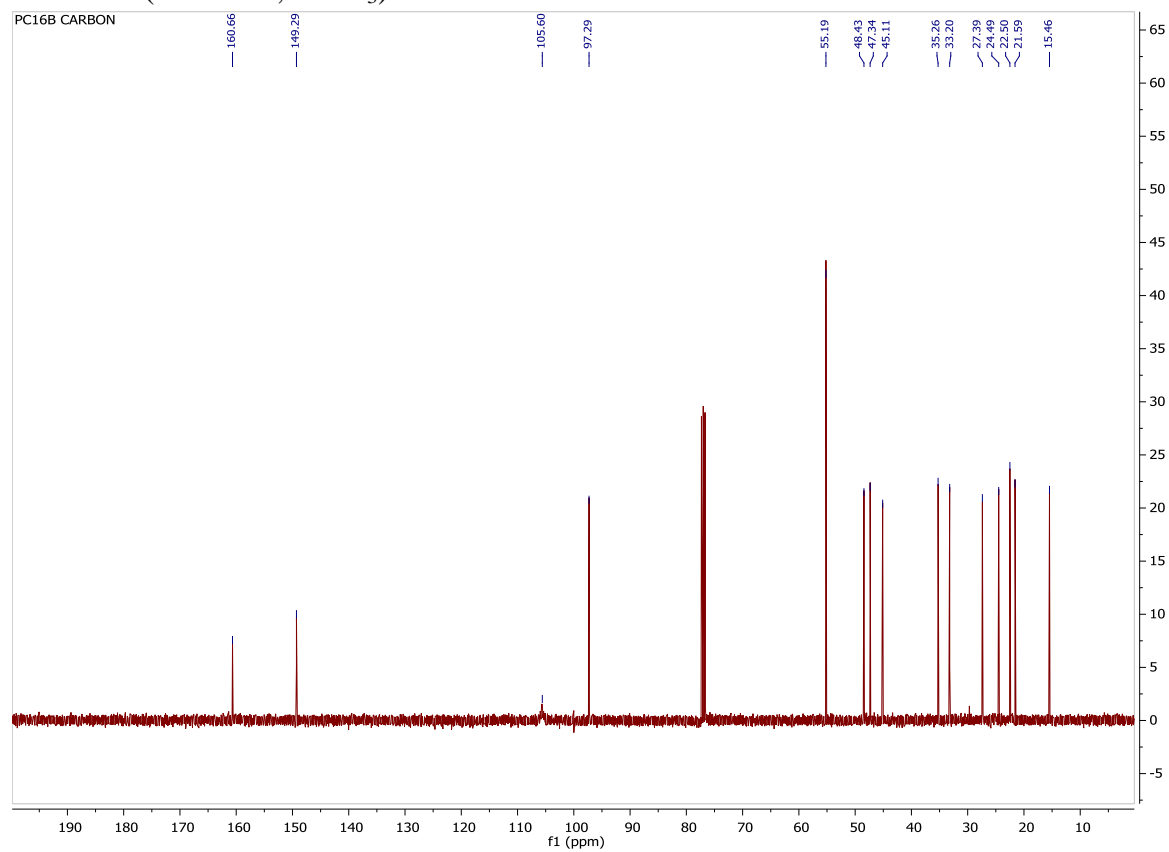

9o

$^1\text{H}$  NMR (400 MHz,  $\text{CDCl}_3$ )

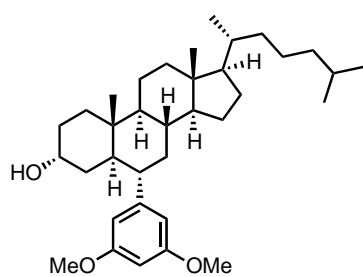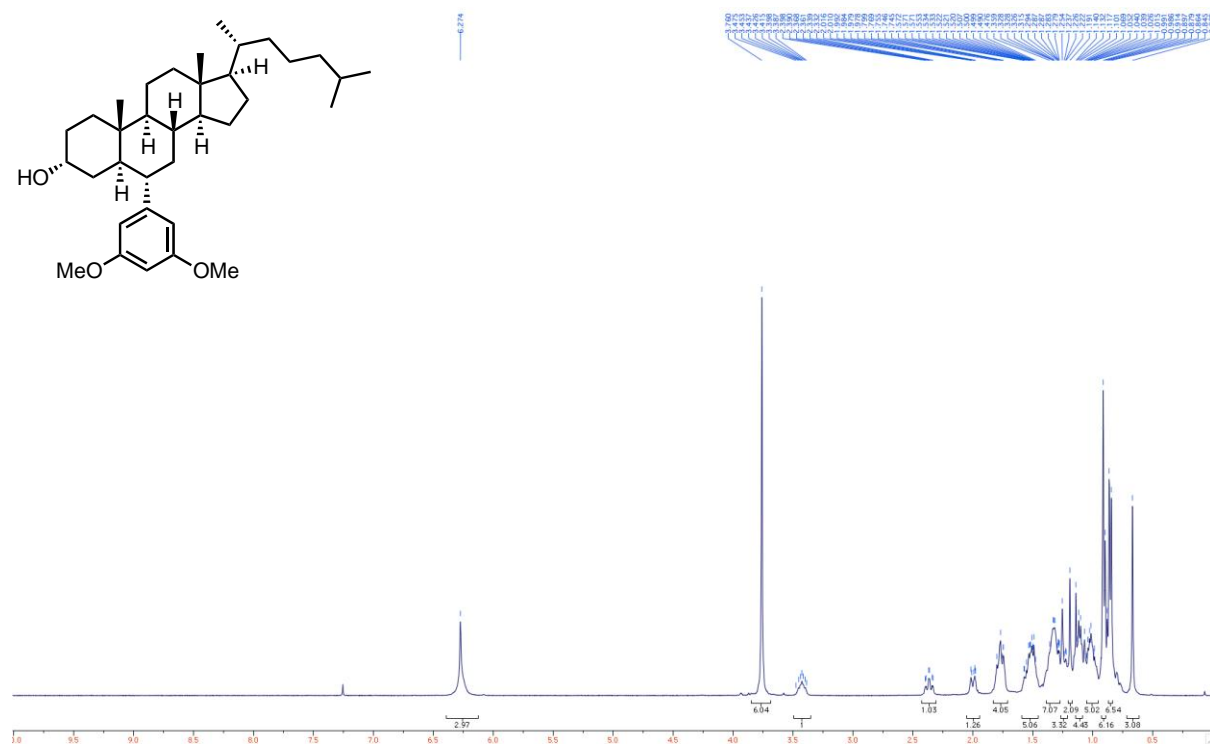

$^{13}\text{C}$  NMR (100 MHz,  $\text{CDCl}_3$ )

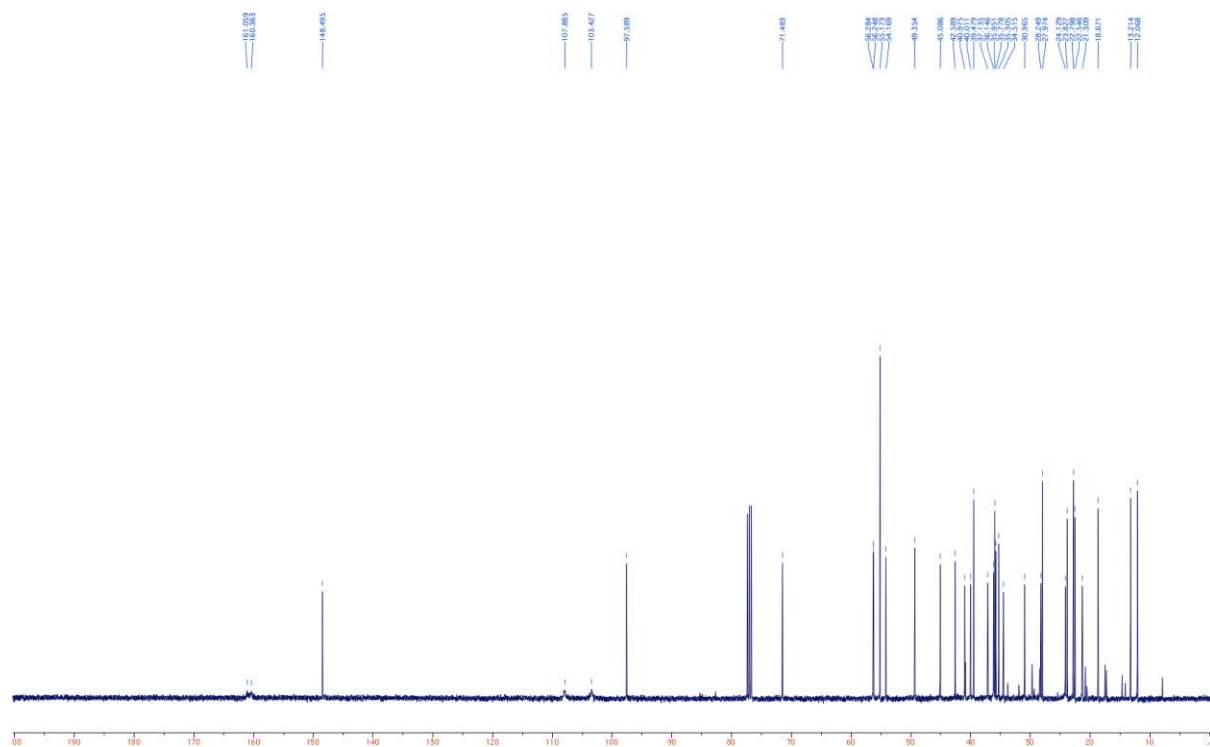

9g

$^1\text{H}$  NMR (400 MHz,  $\text{CDCl}_3$ )

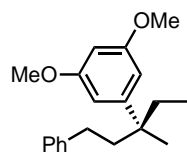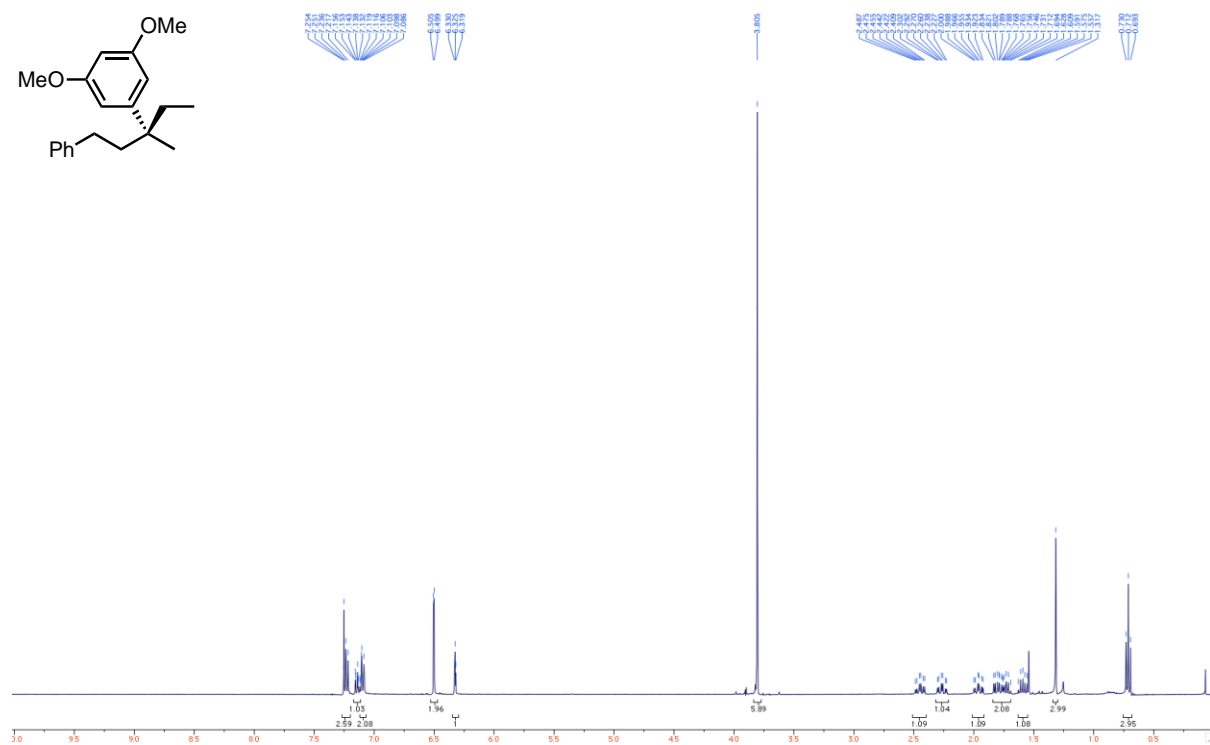

$^{13}\text{C}$  NMR (100 MHz,  $\text{CDCl}_3$ )

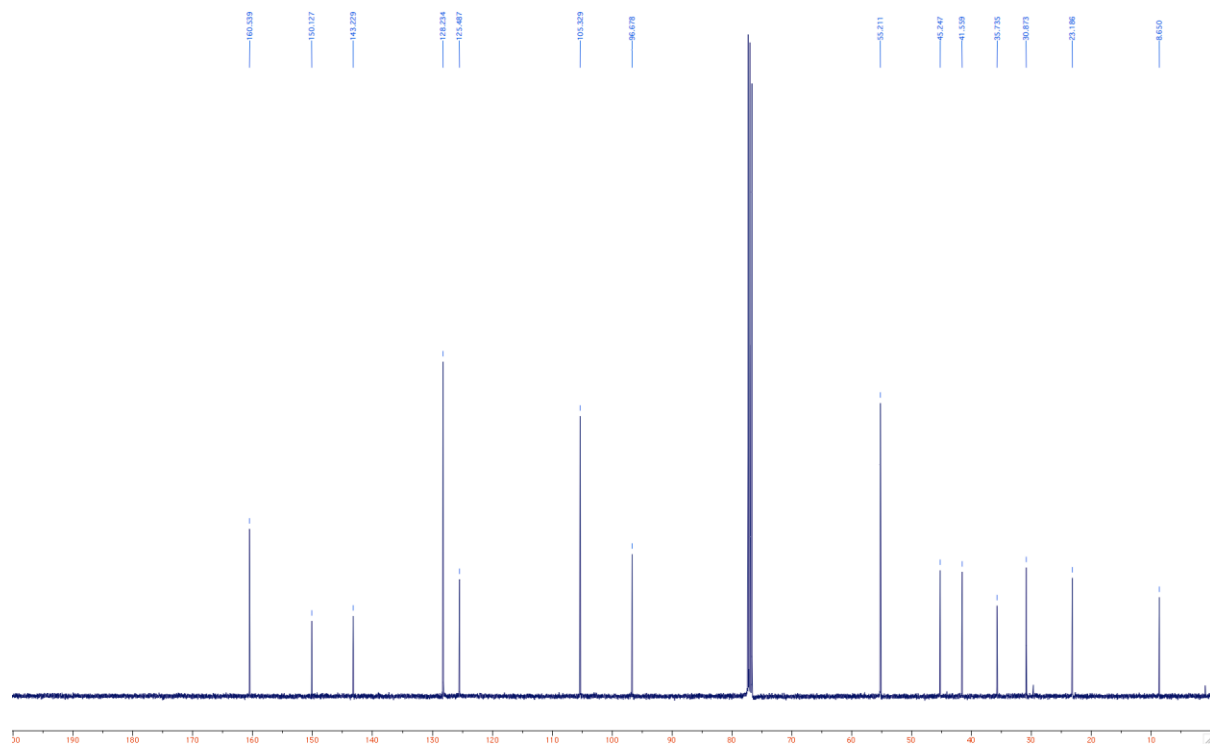

### Chiral HPLC traces: racemic

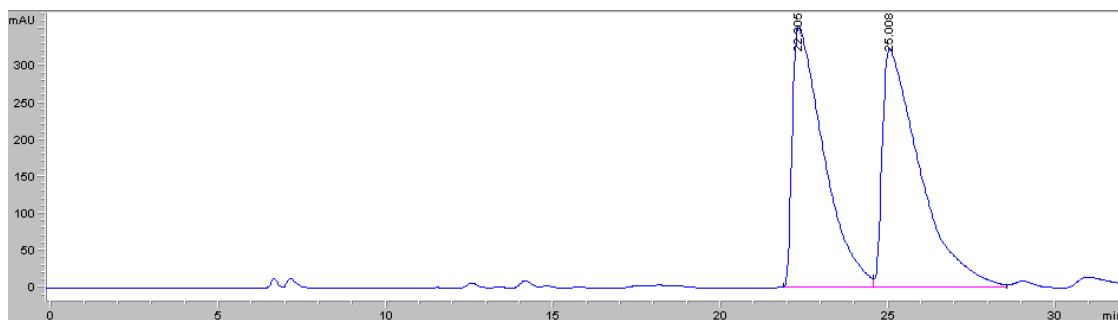

### Chiral HPLC traces: enantioenriched

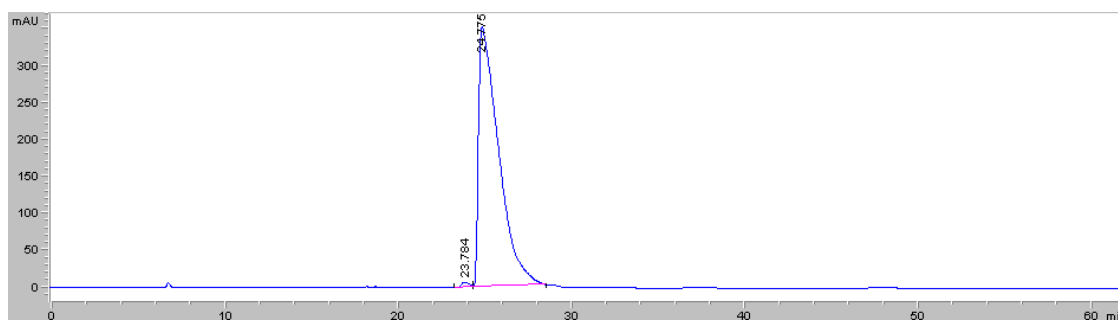

**9h**

$^1\text{H}$  NMR (400 MHz,  $\text{CDCl}_3$ )

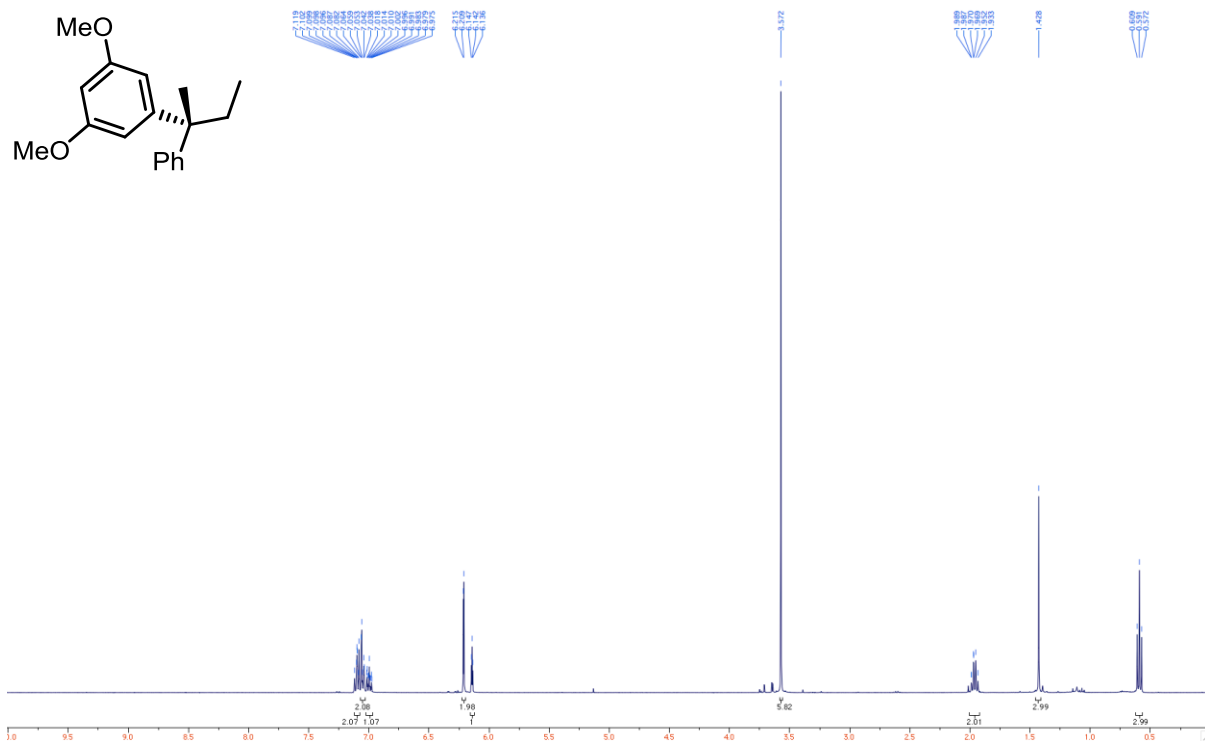

$^{13}\text{C}$  NMR (100 MHz,  $\text{CDCl}_3$ )

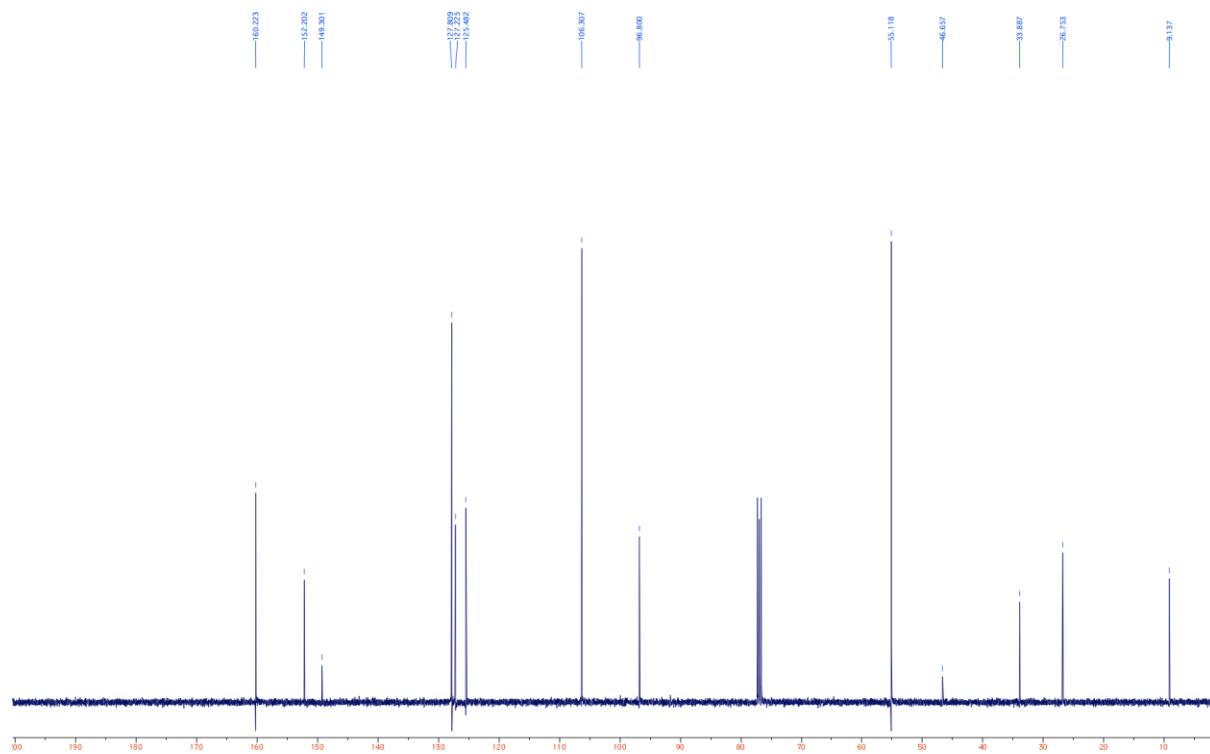



### Chiral HPLC traces: racemic

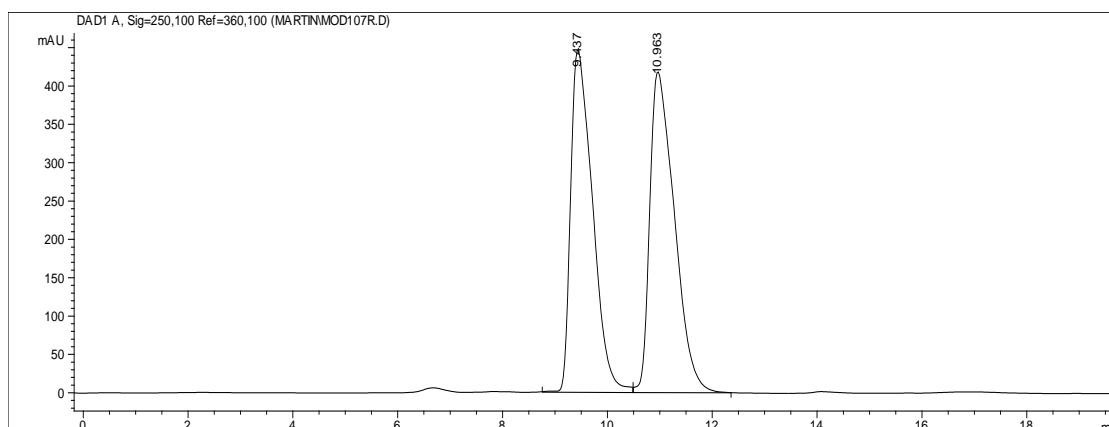

### Chiral HPLC traces: enantioenriched

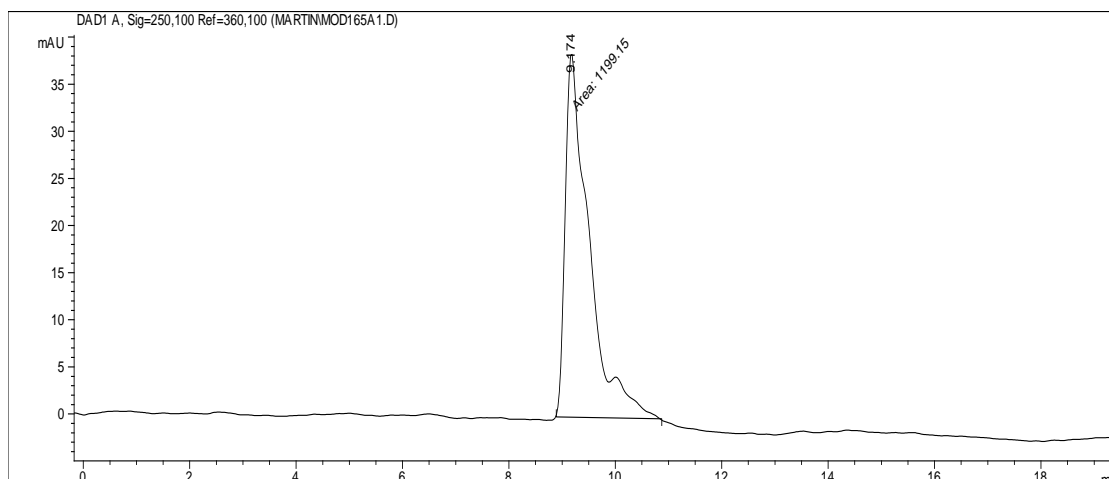

### Chiral HPLC traces: enantioenriched + racemic

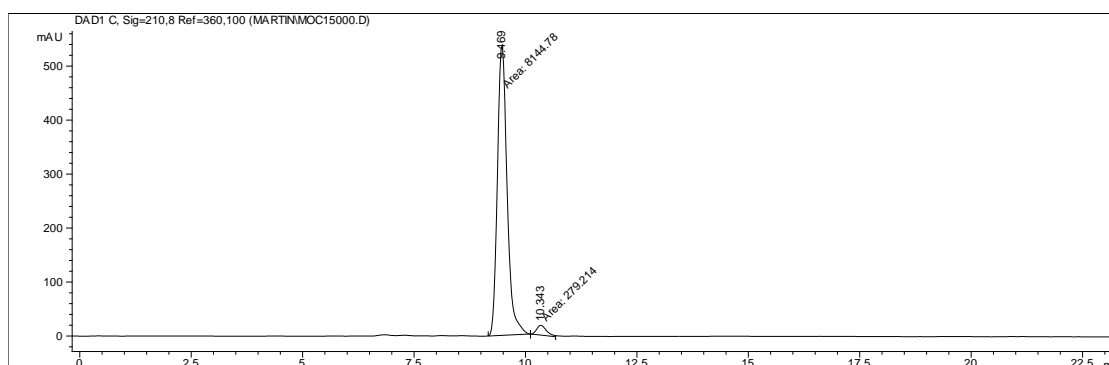

**10a**

$^1\text{H}$  NMR (400 MHz,  $\text{CDCl}_3$ )

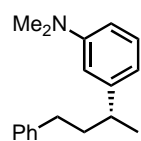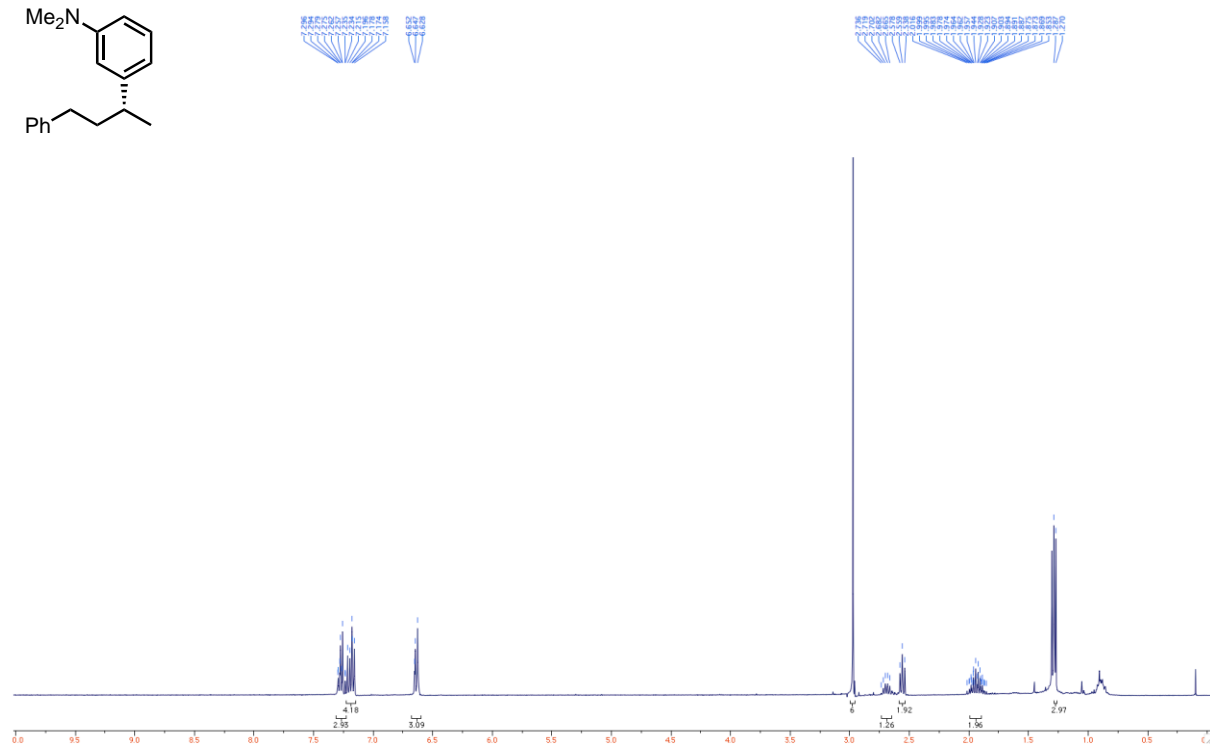

$^{13}\text{C}$  NMR (100 MHz,  $\text{CDCl}_3$ )

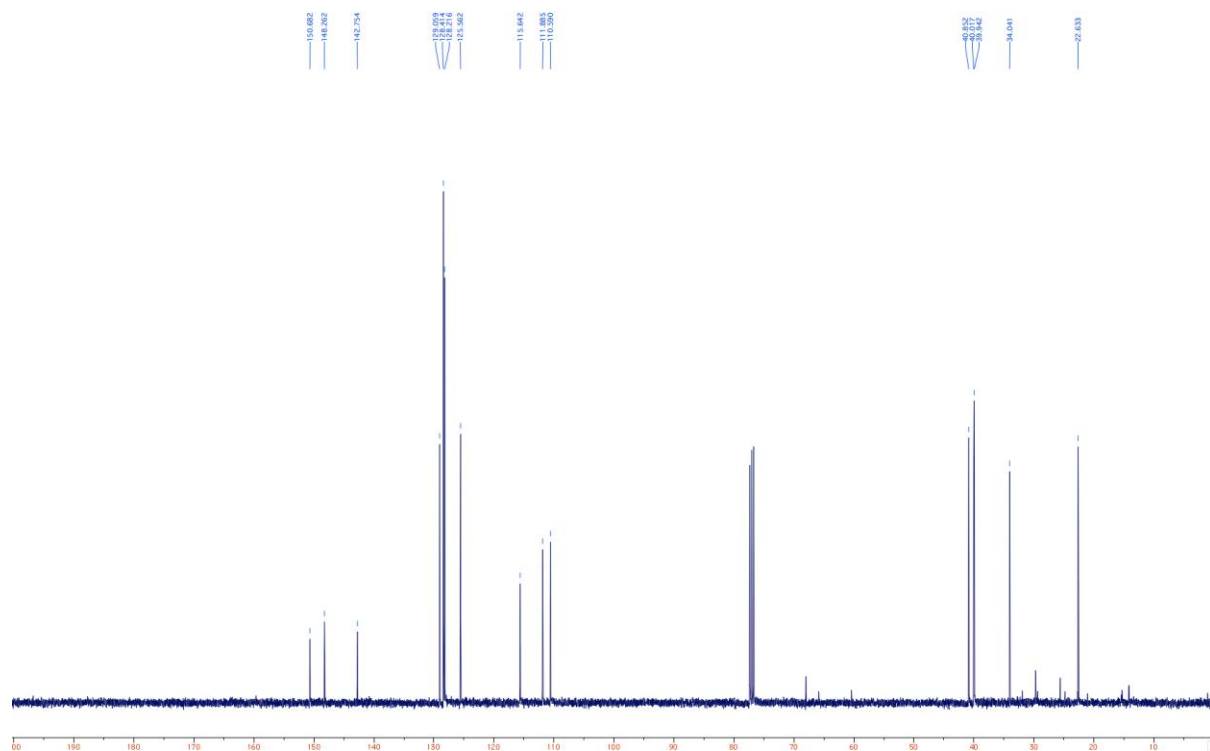

### Chiral SFC traces: racemic

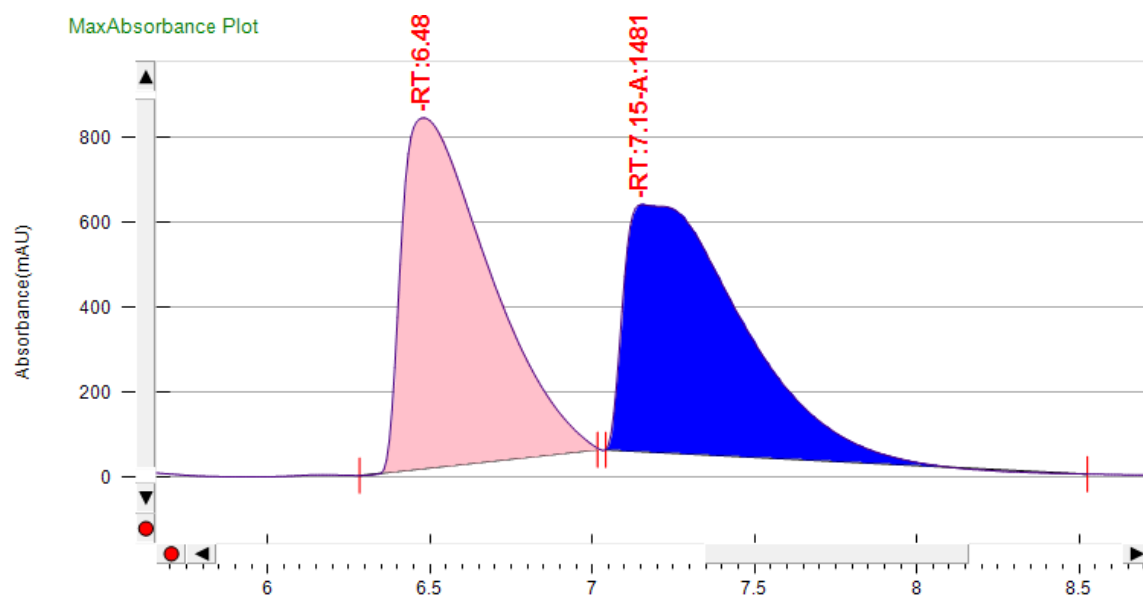

### Chiral SFC traces: enantioenriched

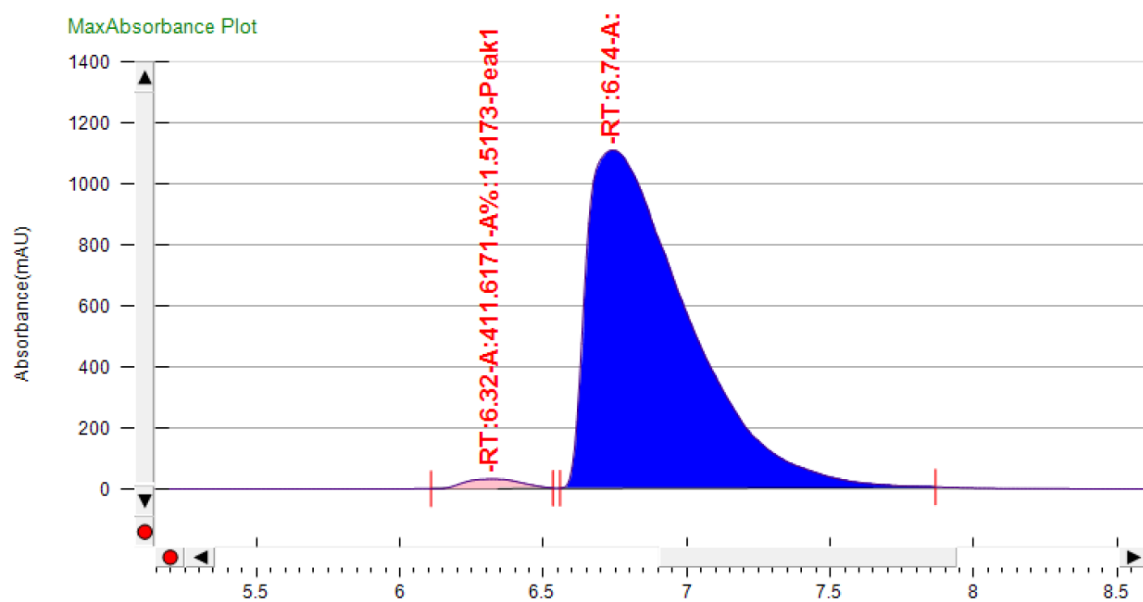

10q

<sup>1</sup>H NMR (400 MHz, CDCl<sub>3</sub>)

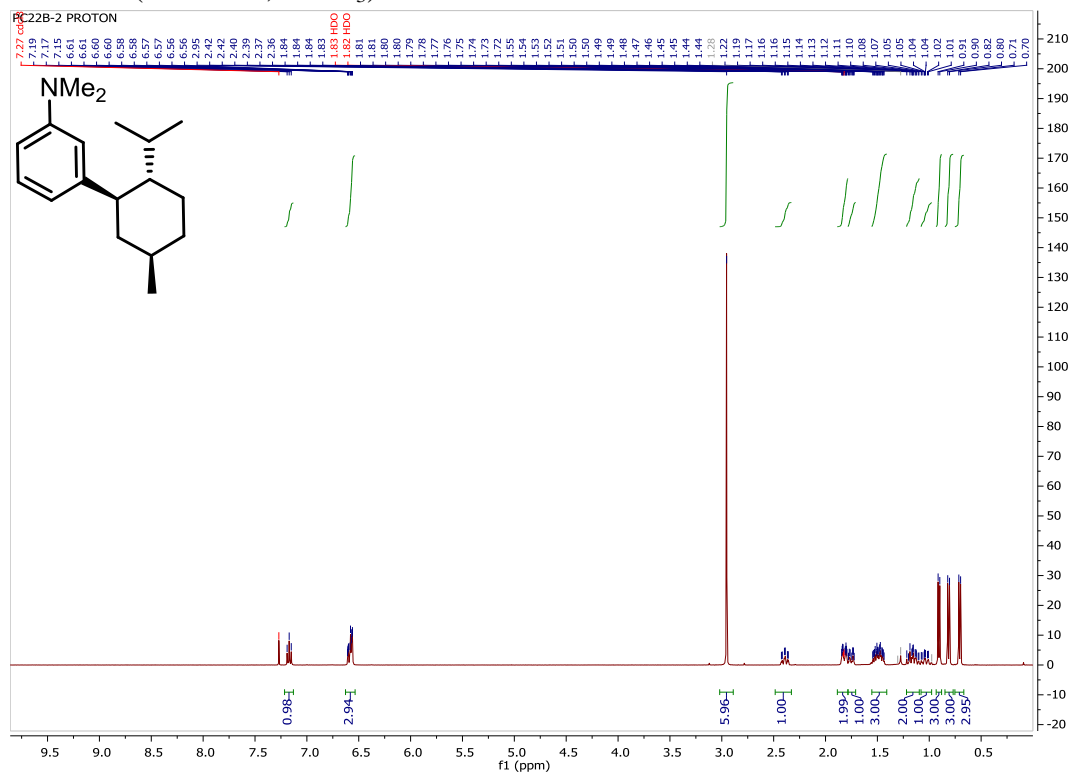

<sup>13</sup>C NMR (100 MHz, CDCl<sub>3</sub>)

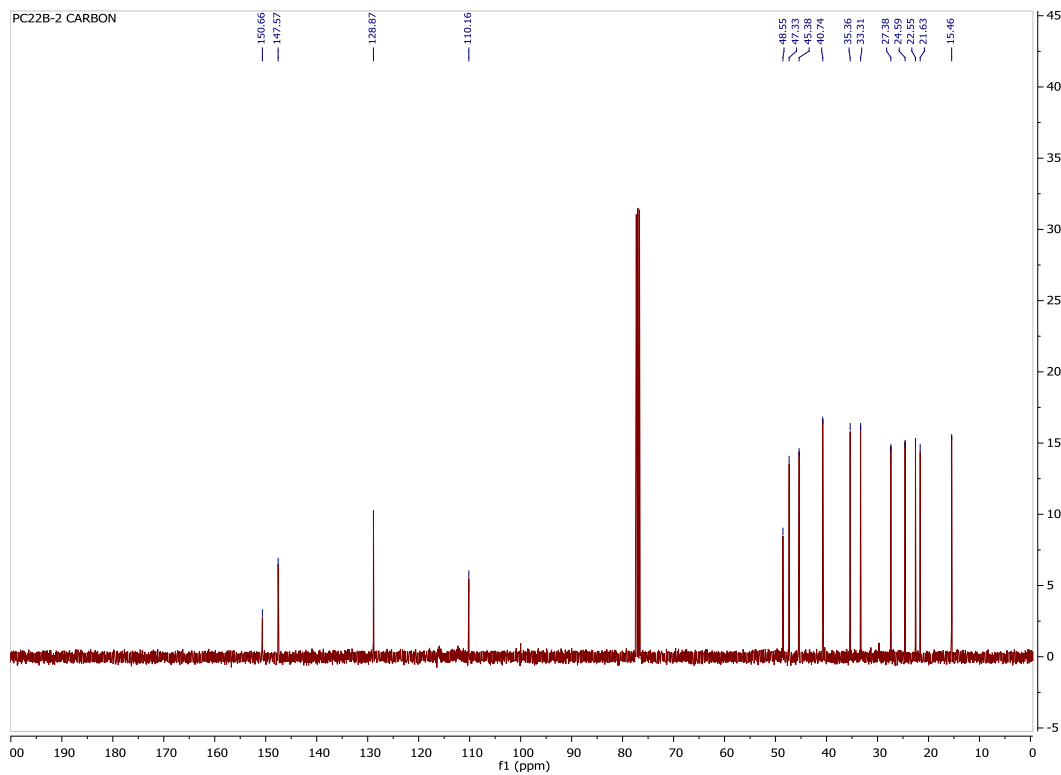



# 11a

$^1\text{H}$  NMR (400 MHz,  $\text{CDCl}_3$ )

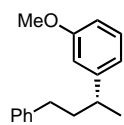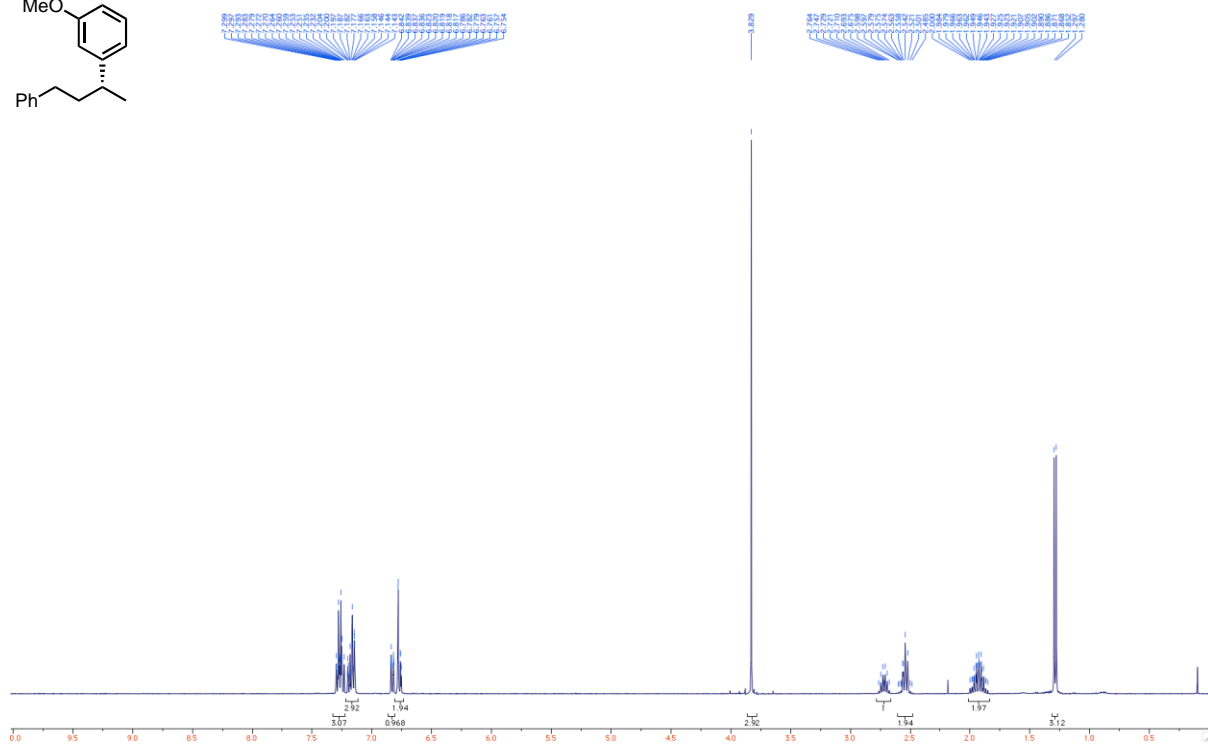

$^{13}\text{C}$  NMR (100 MHz,  $\text{CDCl}_3$ )

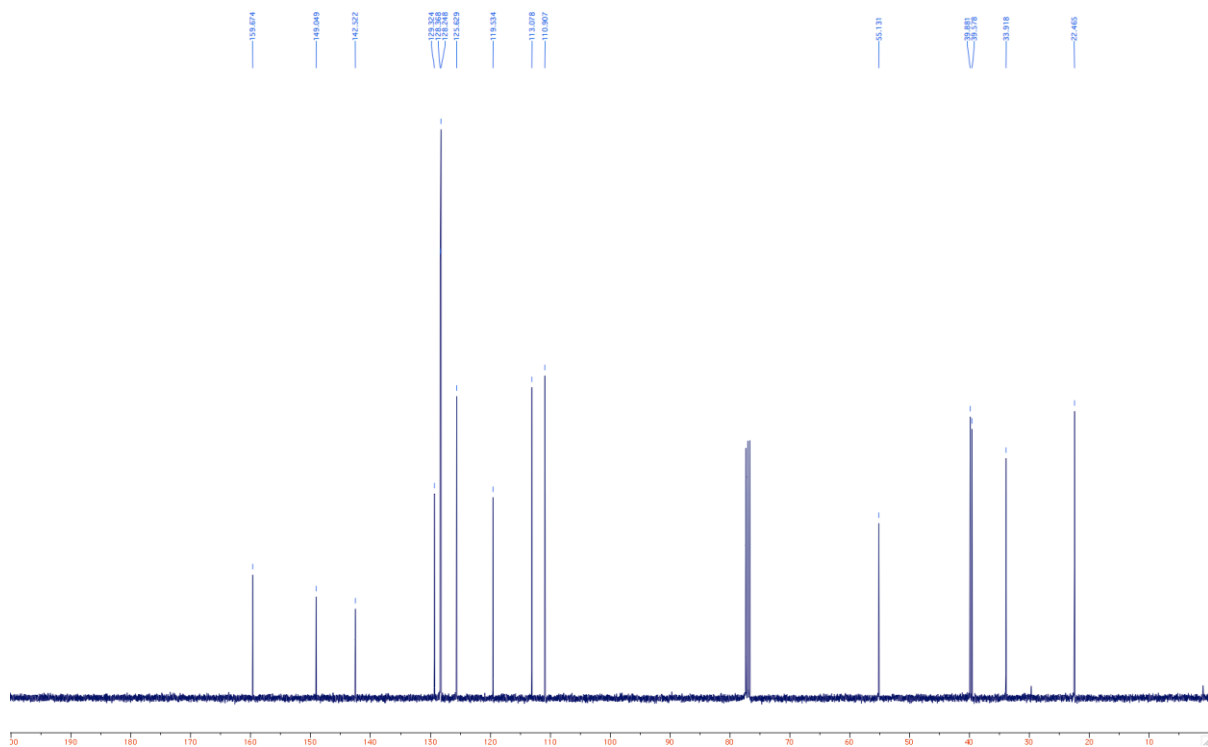

### Chiral SFC traces: racemic

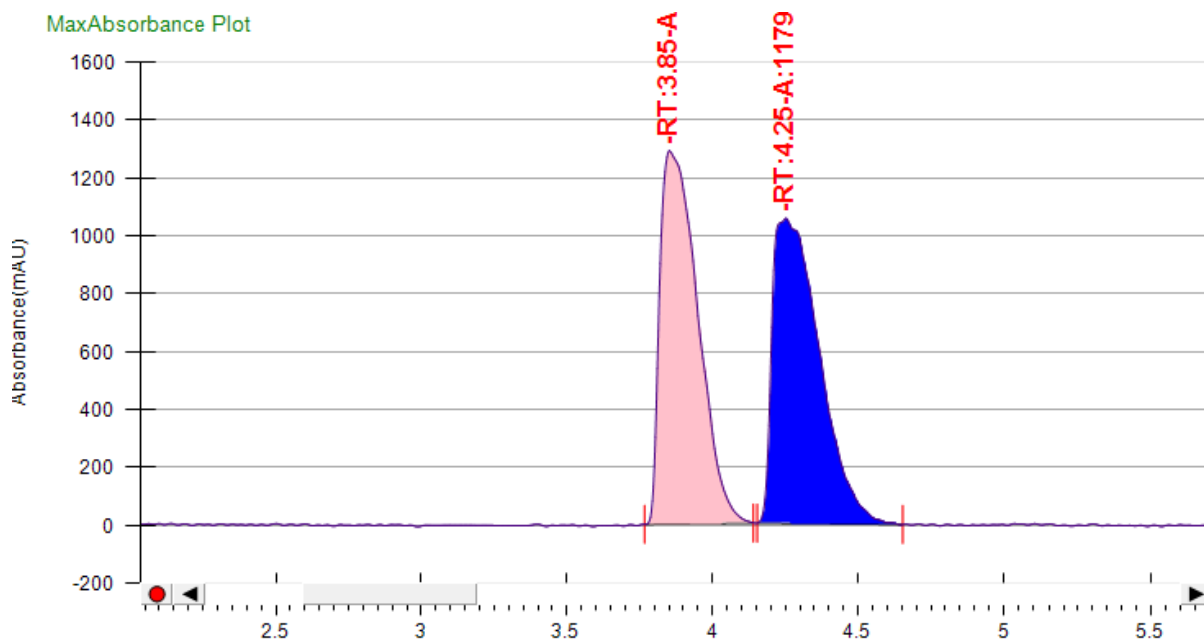

### Chiral SFC: enantioenriched

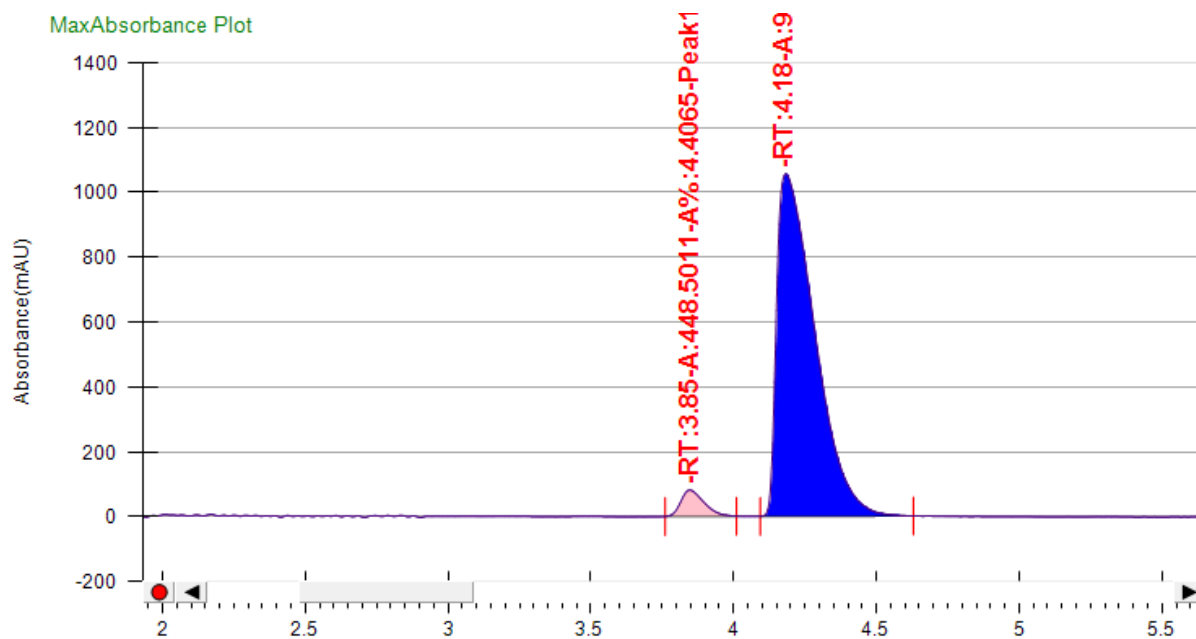

111

### <sup>1</sup>H NMR (400 MHz, CDCl<sub>3</sub>)

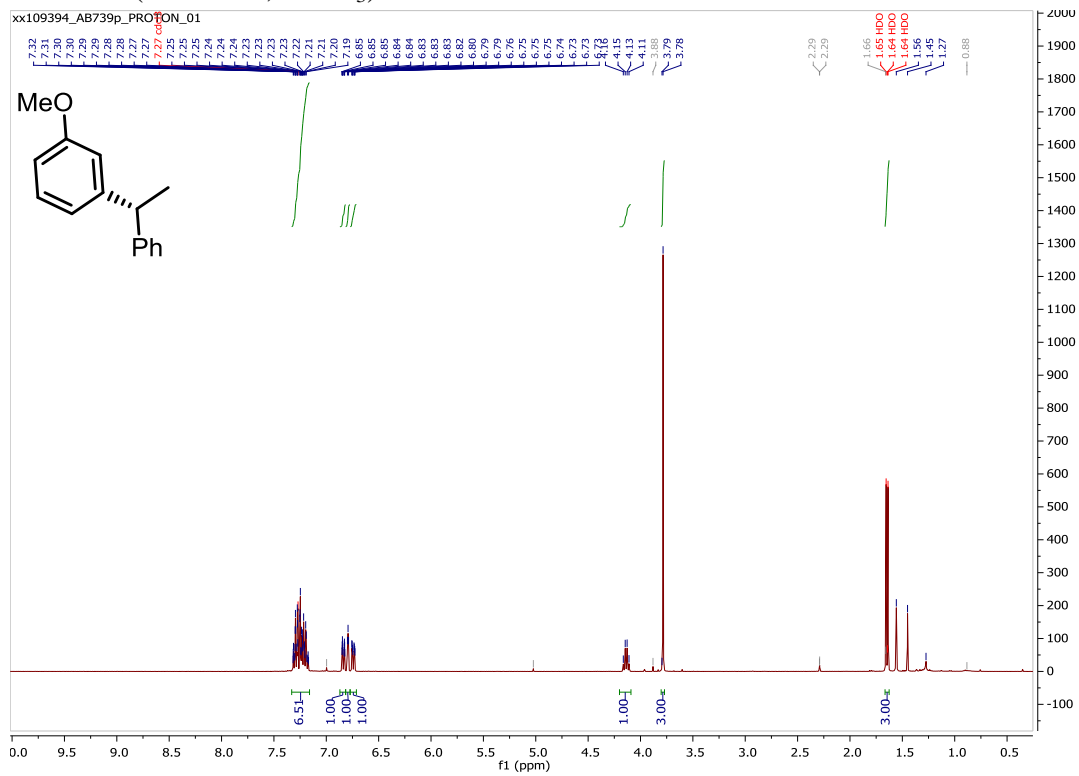

### <sup>13</sup>C NMR (100 MHz, CDCl<sub>3</sub>)

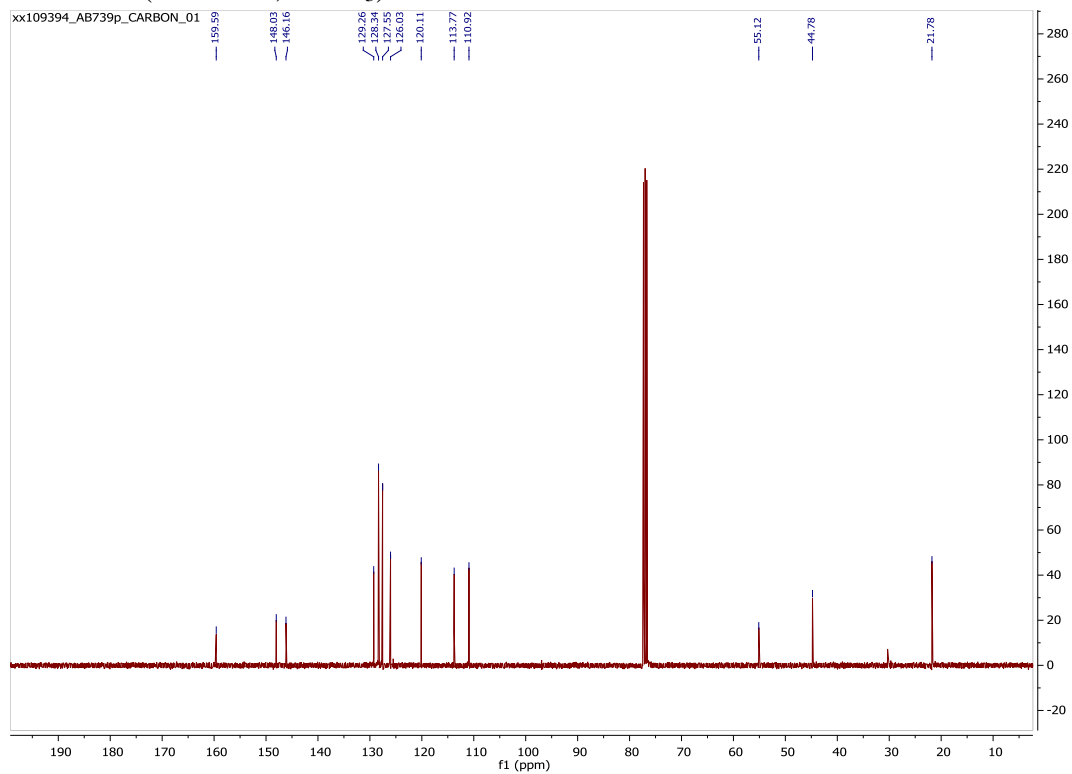



### Chiral SFC traces: racemic

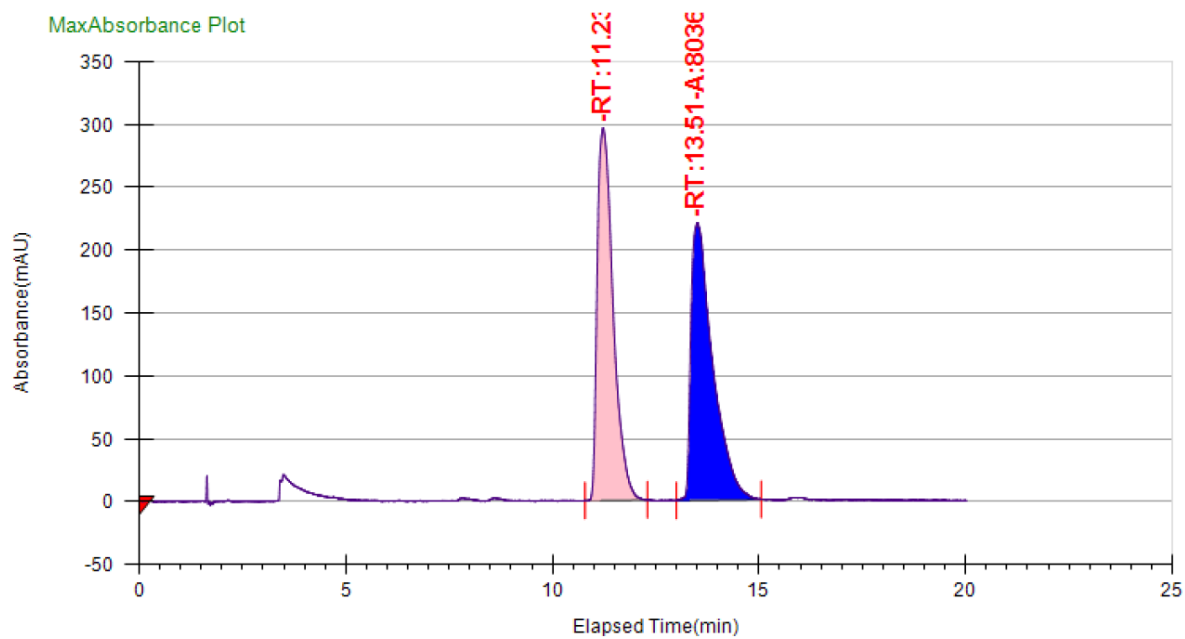

### Chiral SFC traces: enantioenriched

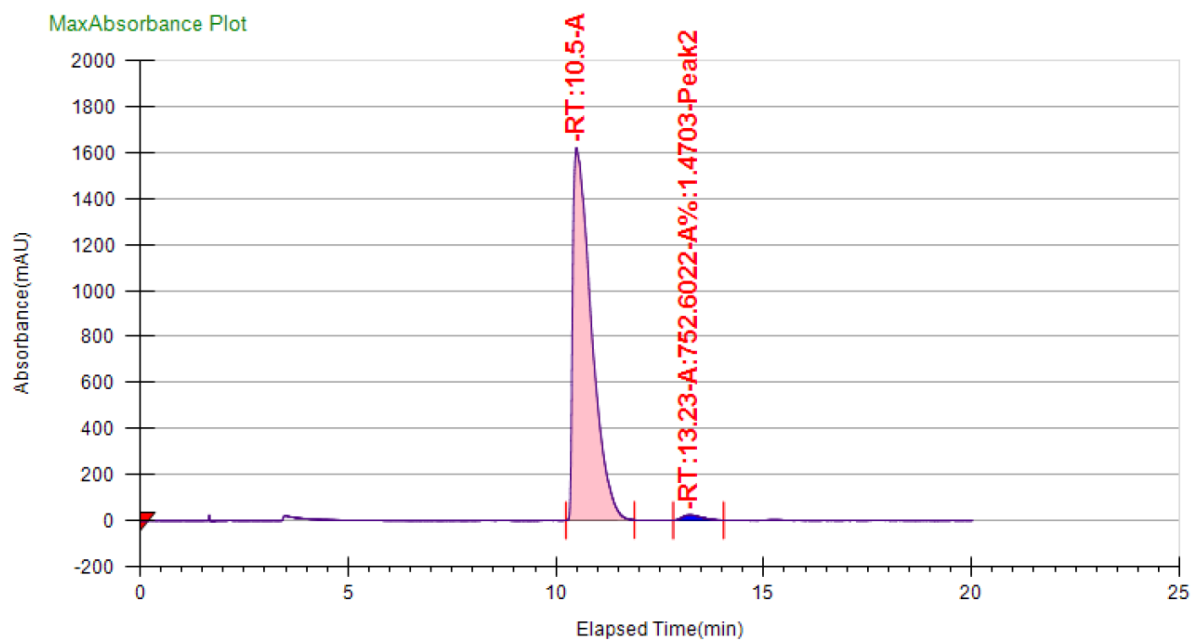

11h

$^1\text{H}$  NMR (400 MHz,  $\text{CDCl}_3$ )

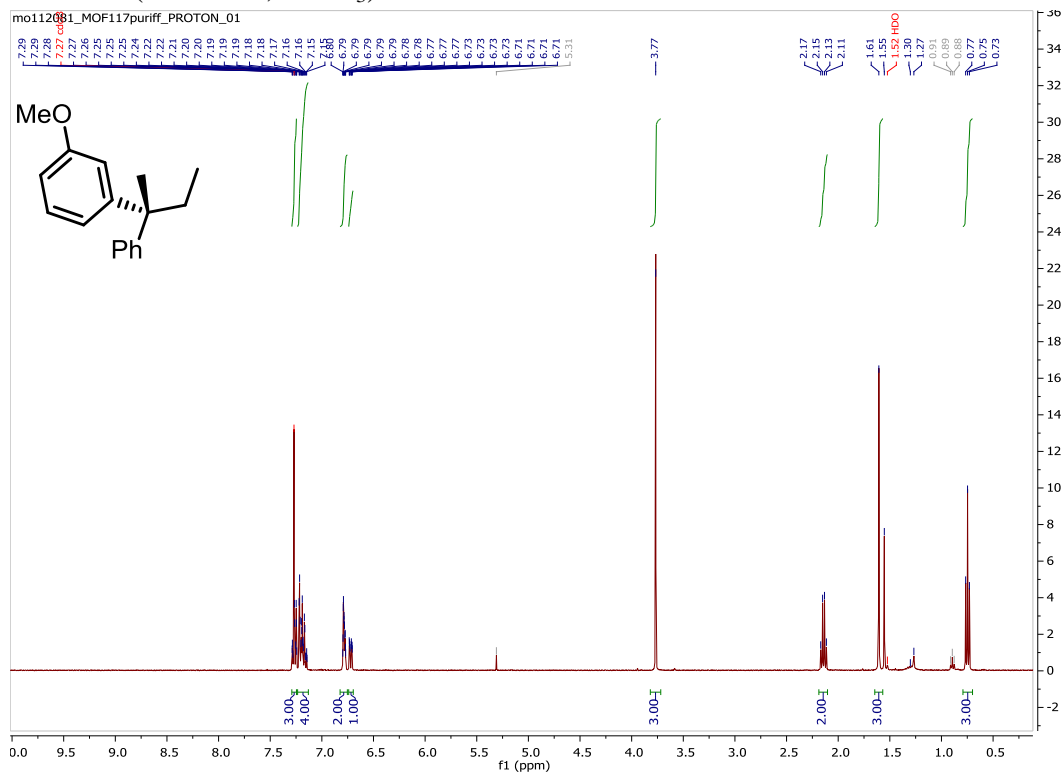

$^{13}\text{C}$  NMR (100 MHz,  $\text{CDCl}_3$ )

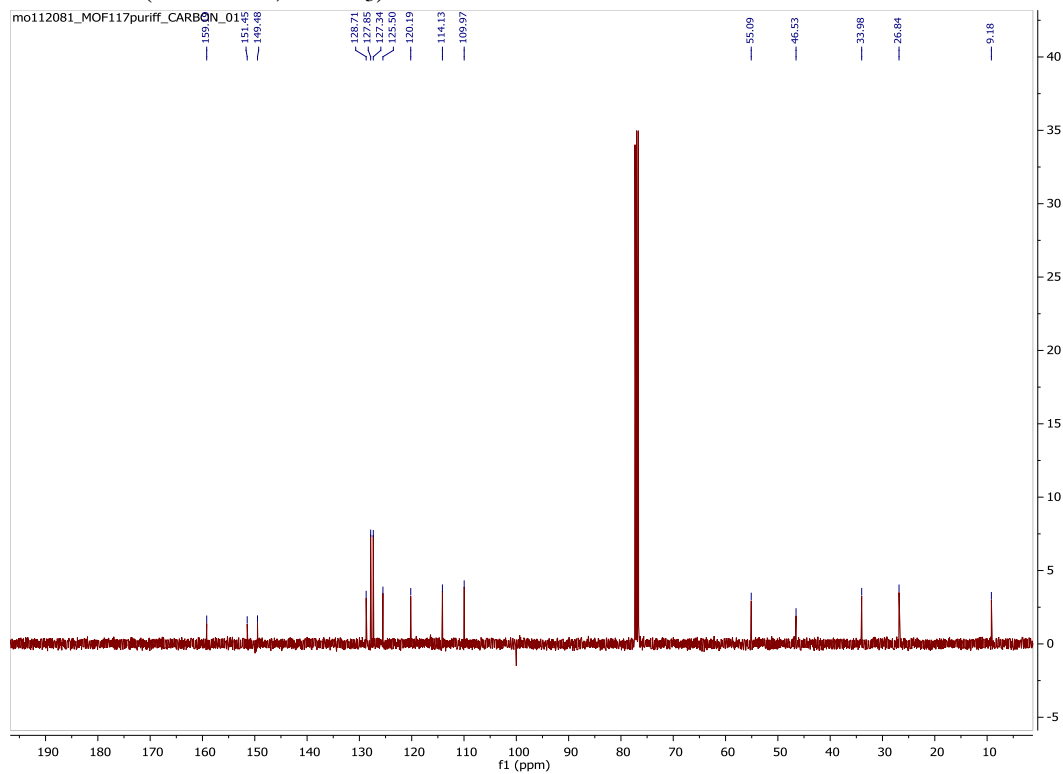

## Chiral SFC traces: racemic

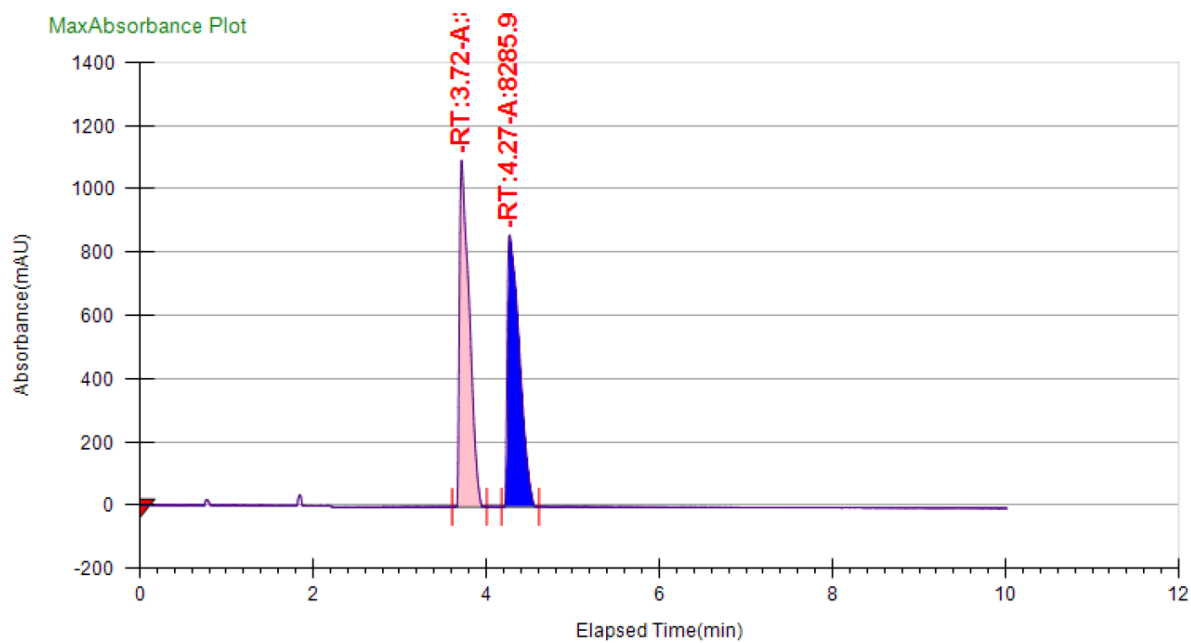

## Chiral SFC traces: enantioenriched

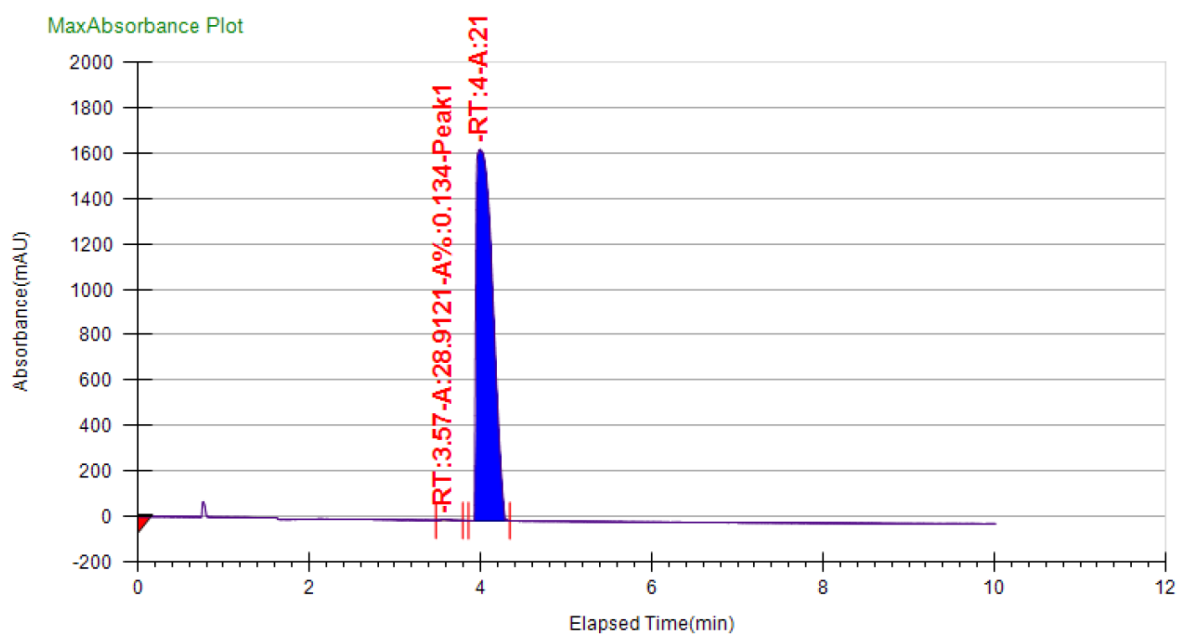

**18b**

$^1\text{H}$  NMR (400 MHz,  $\text{CDCl}_3$ )

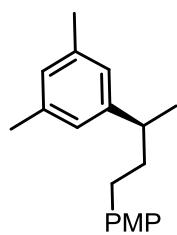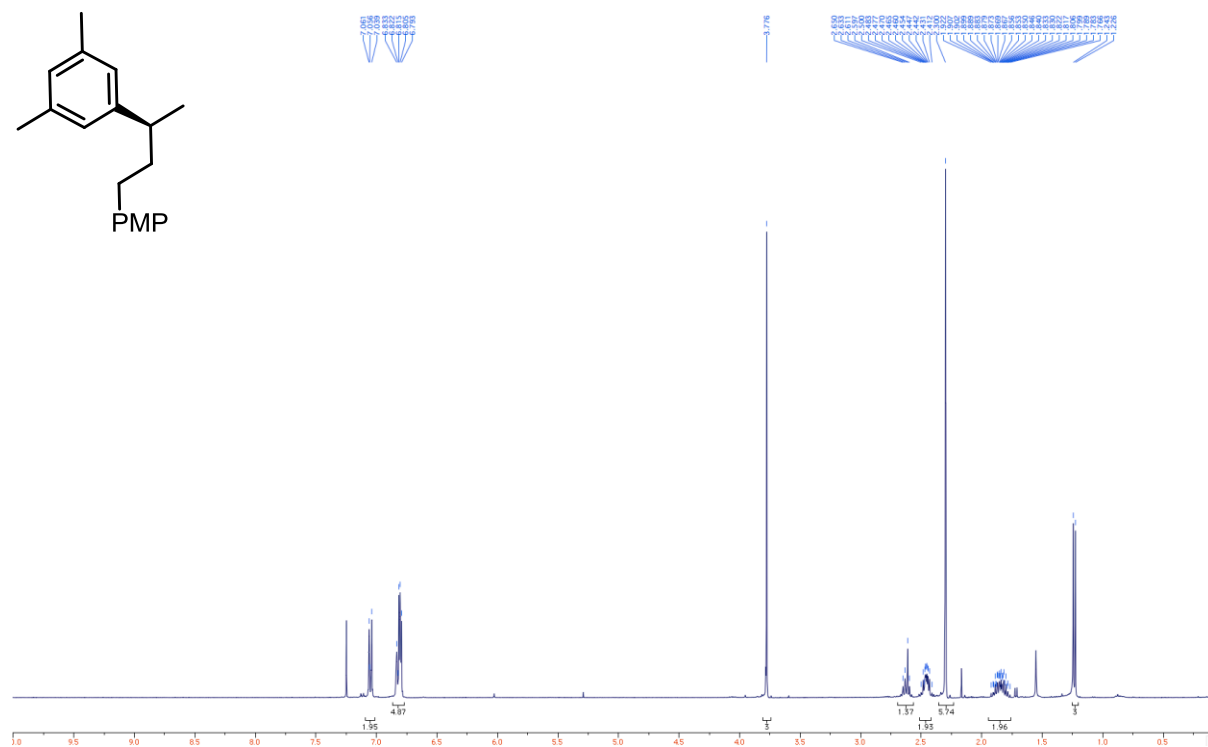

$^{13}\text{C}$  NMR (100 MHz,  $\text{CDCl}_3$ )

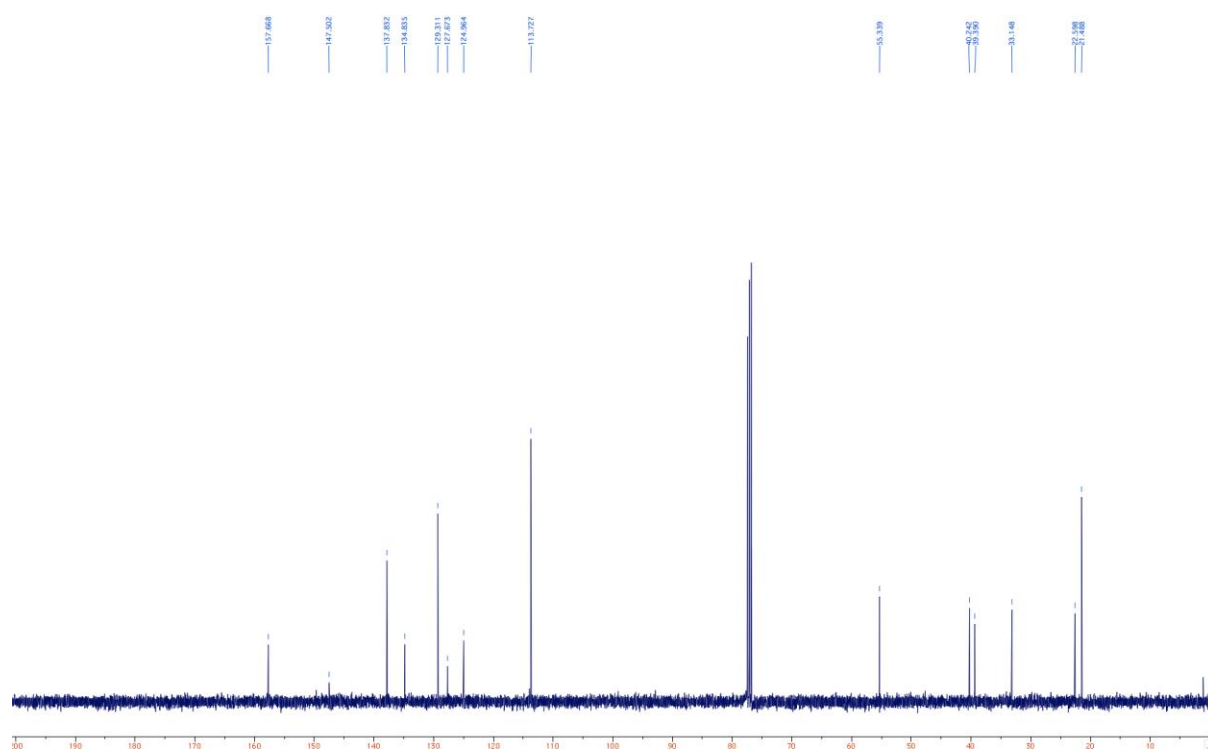

### Chiral SFC traces: racemic

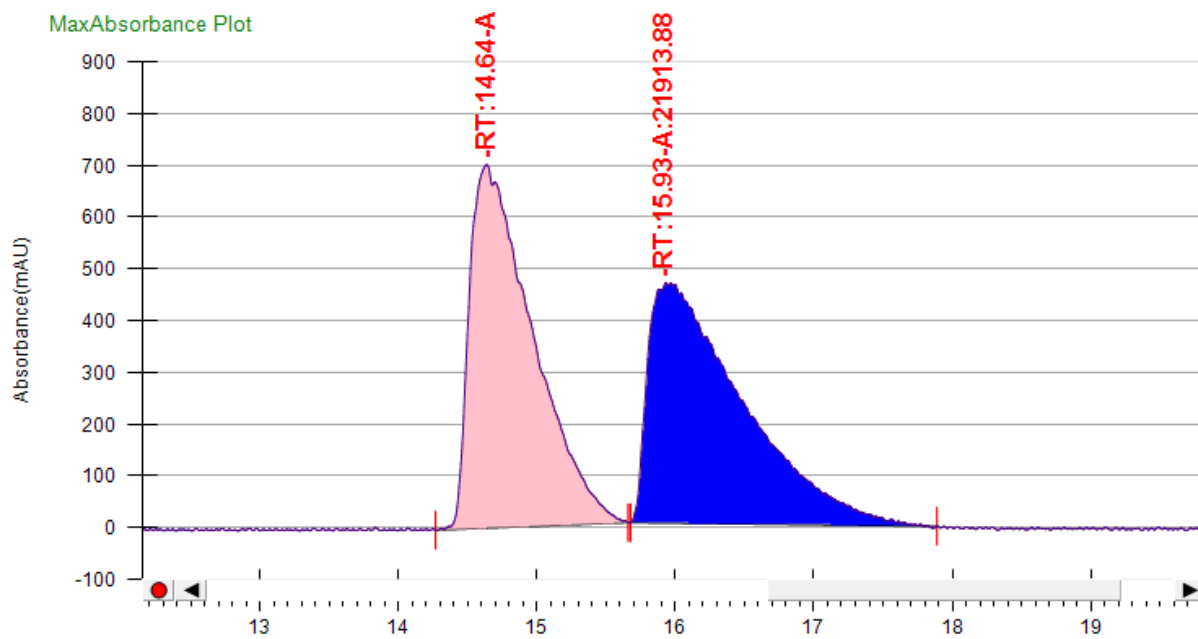

### Chiral SFC traces: enantioenriched

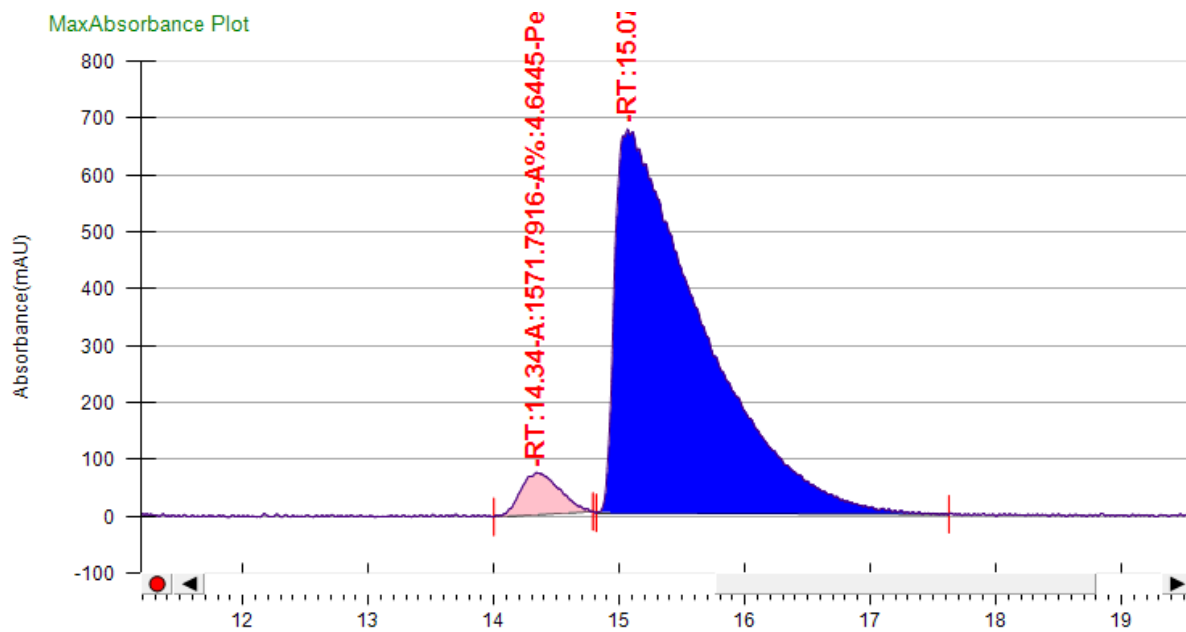

181

<sup>1</sup>H NMR (400 MHz, CDCl<sub>3</sub>)

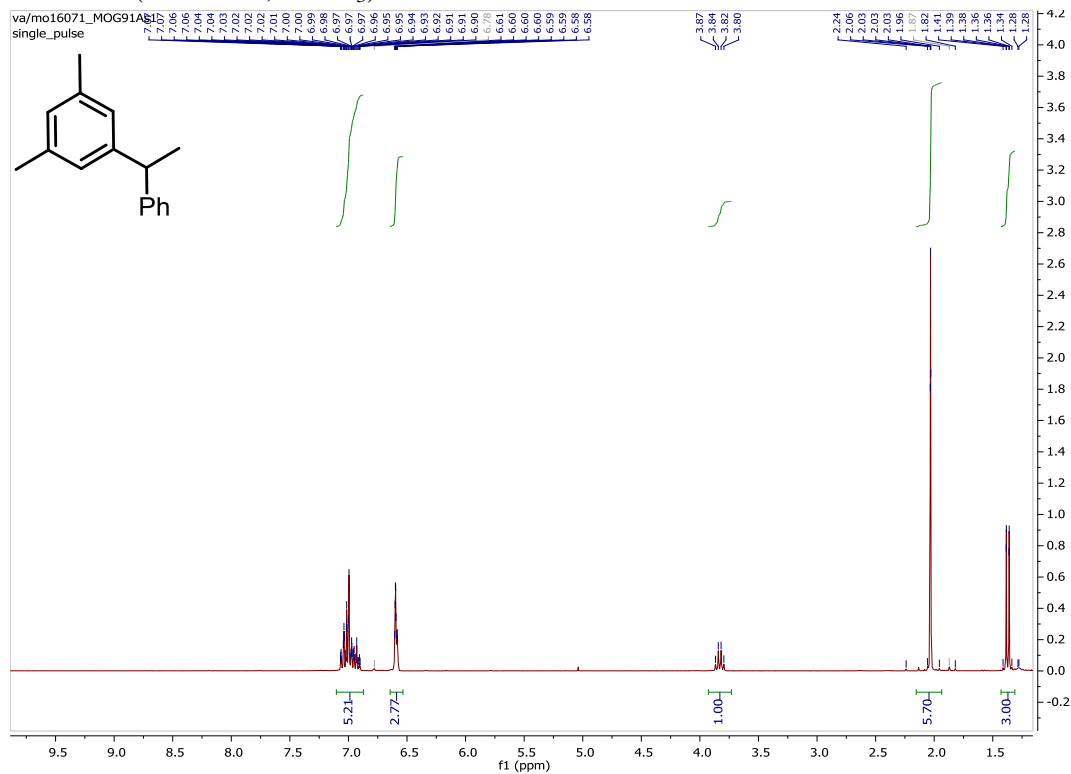

<sup>13</sup>C NMR (100 MHz, CDCl<sub>3</sub>)

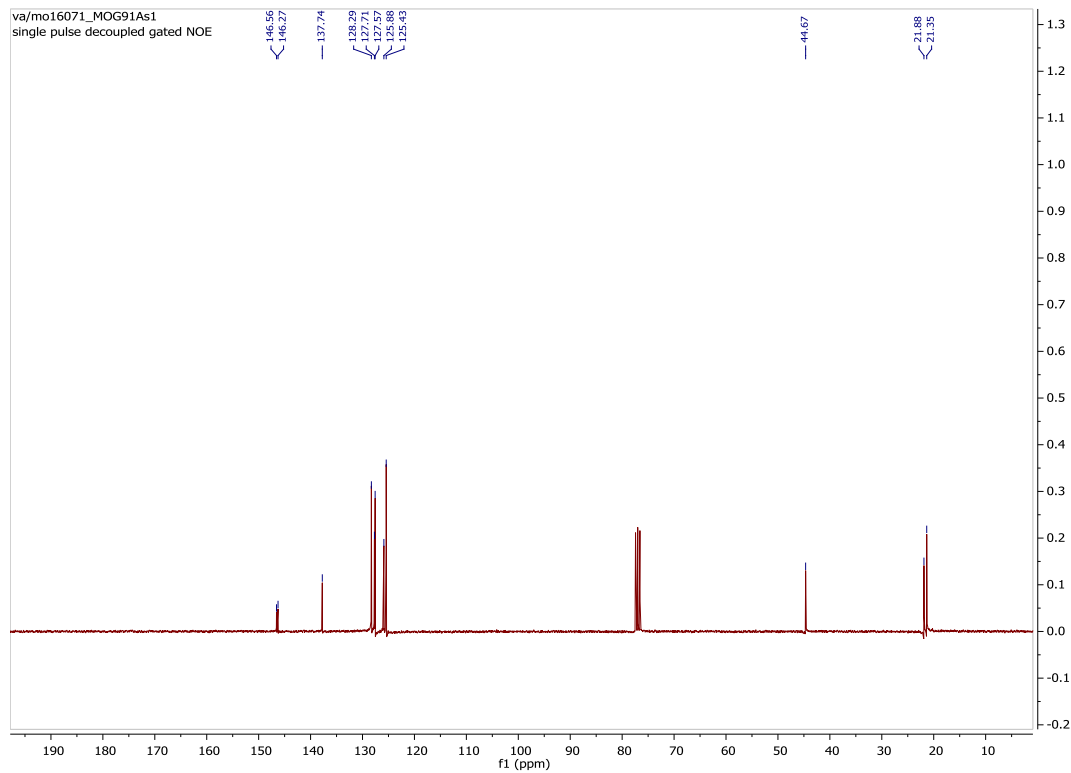

**18g<sup>7</sup>**

<sup>1</sup>H NMR (400 MHz, CDCl<sub>3</sub>)

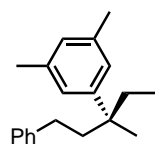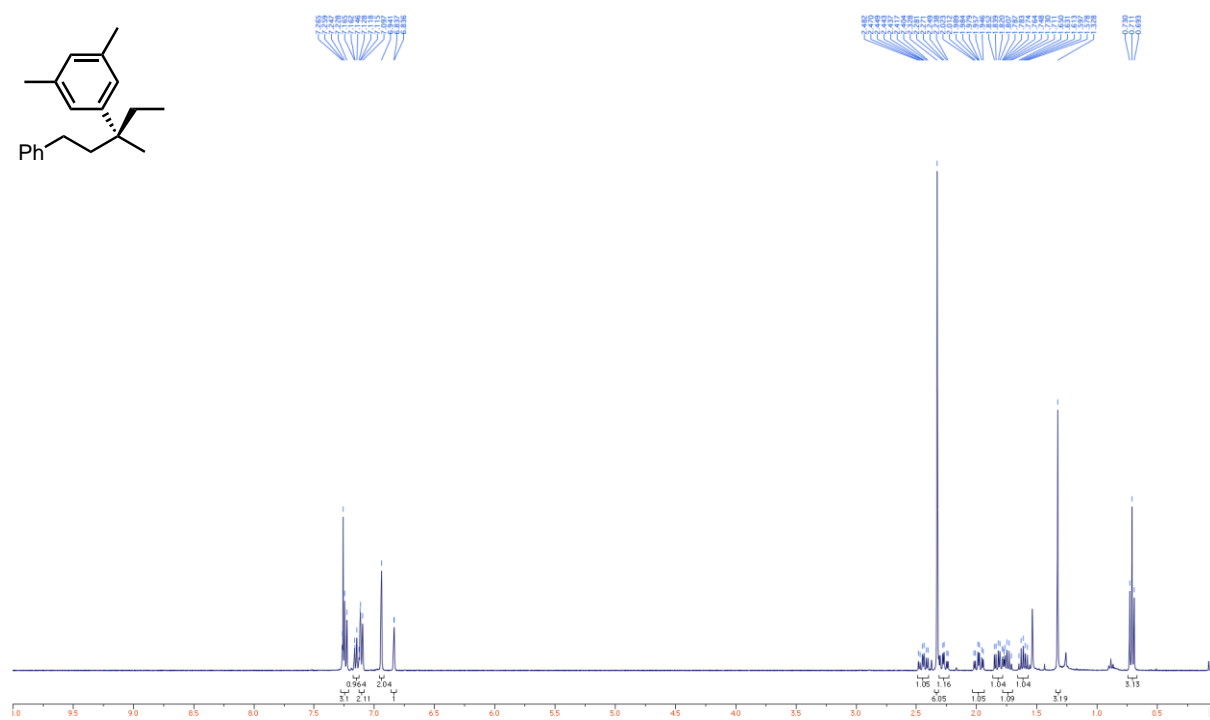

<sup>13</sup>C NMR (100 MHz, CDCl<sub>3</sub>)

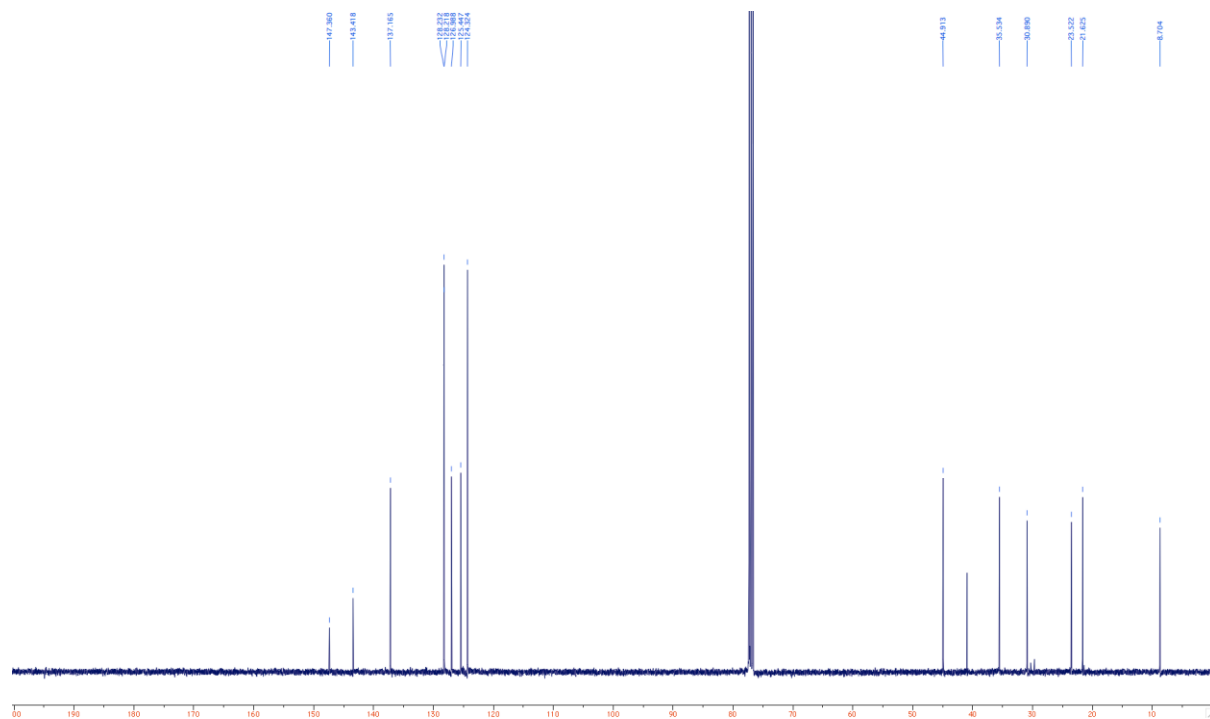

<sup>7</sup> e.r. of **18ga** reflects the e.r. of **18g** (see below).

18h

<sup>1</sup>H NMR (400 MHz, CDCl<sub>3</sub>)

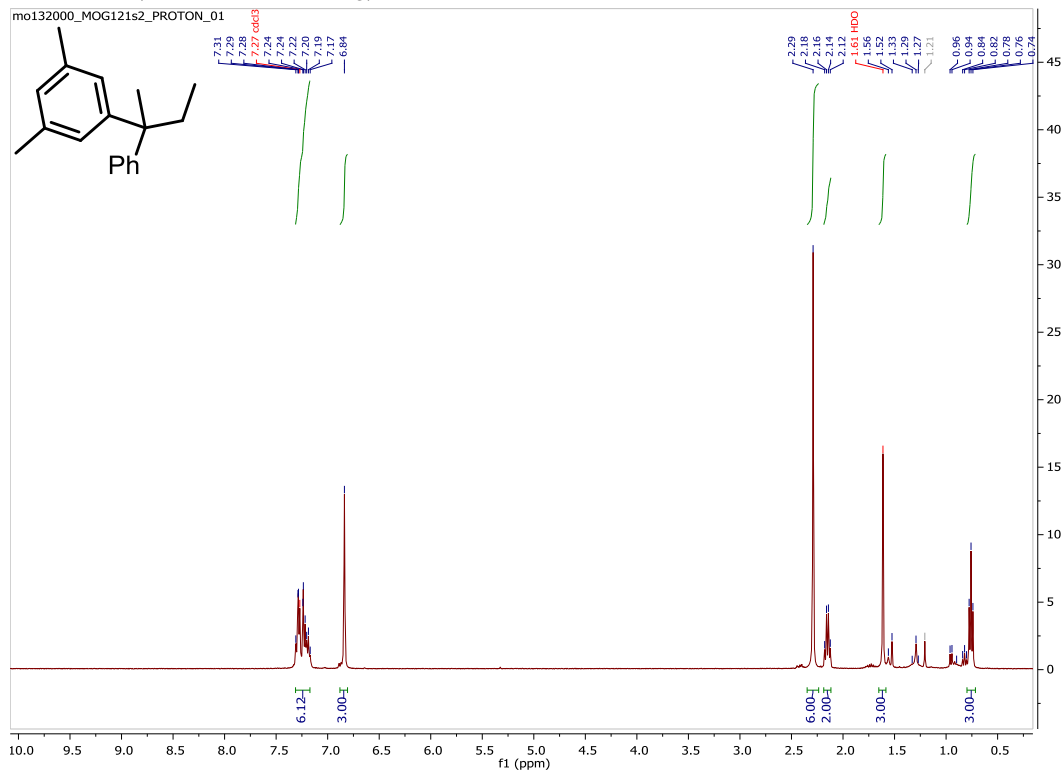

<sup>13</sup>C NMR (100 MHz, CDCl<sub>3</sub>)

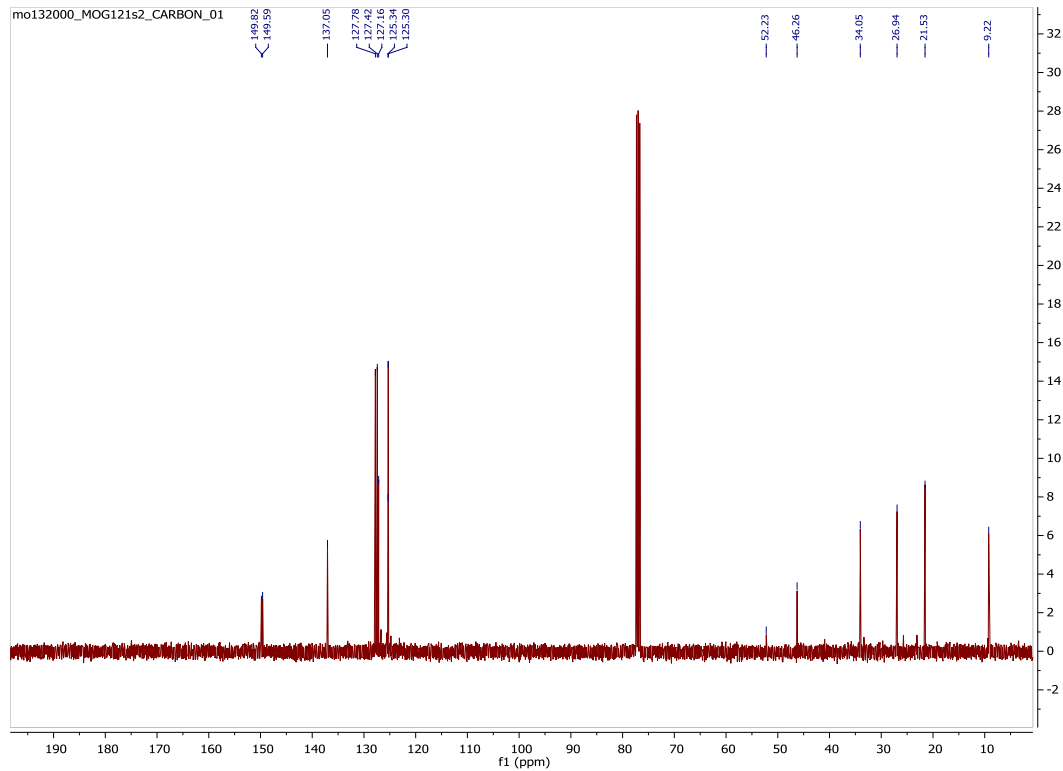



# 19b and 21 – unseparable mixture

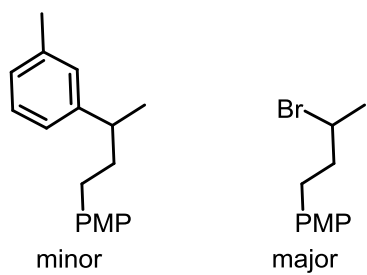

$^1\text{H}$  NMR (400 MHz,  $\text{CDCl}_3$ )

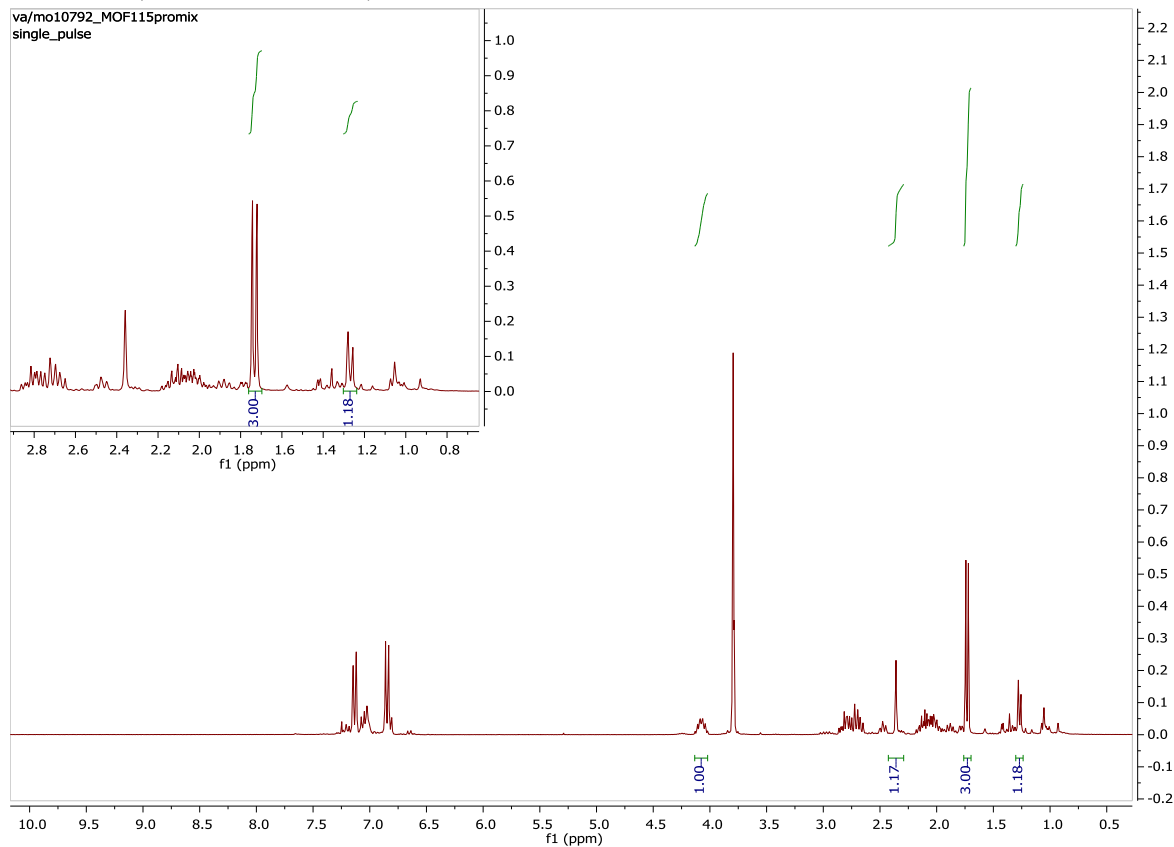

GC-MS chromatogram of inseparable mixture of products:

Coupling product **13b**:

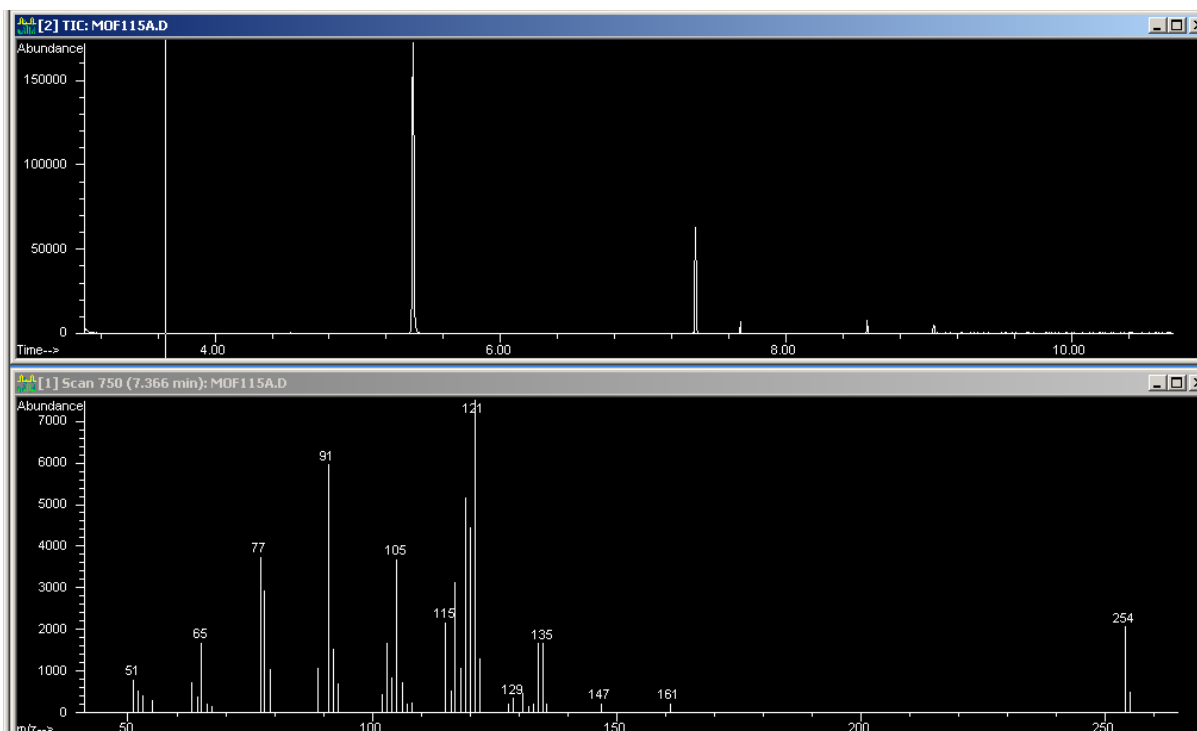

Bromination on C(sp<sup>3</sup>) centre:

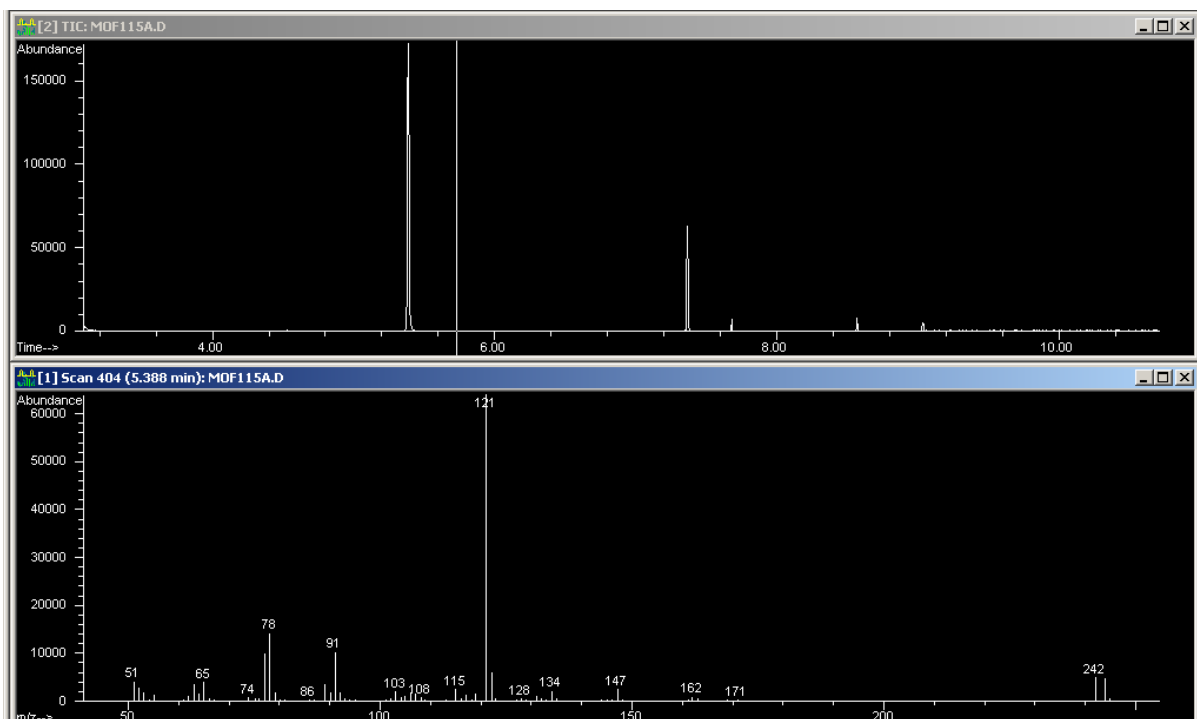

19g

$^1\text{H}$  NMR (400 MHz,  $\text{CDCl}_3$ )

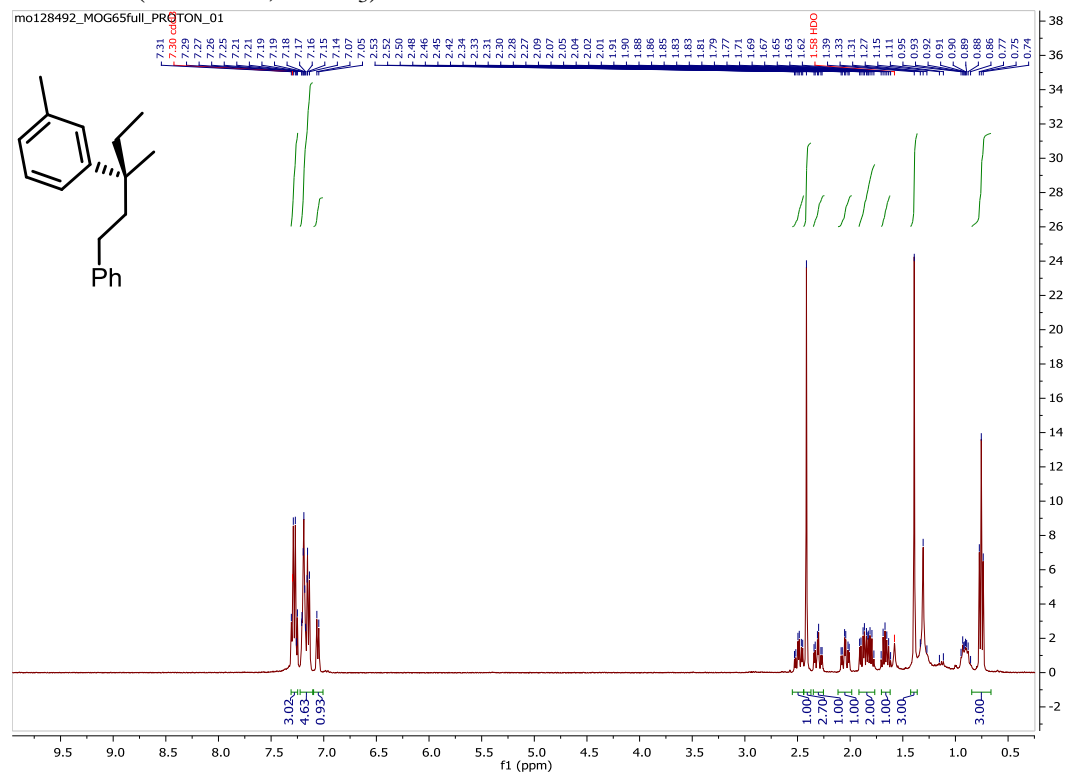

$^{13}\text{C}$  NMR (100 MHz,  $\text{CDCl}_3$ )

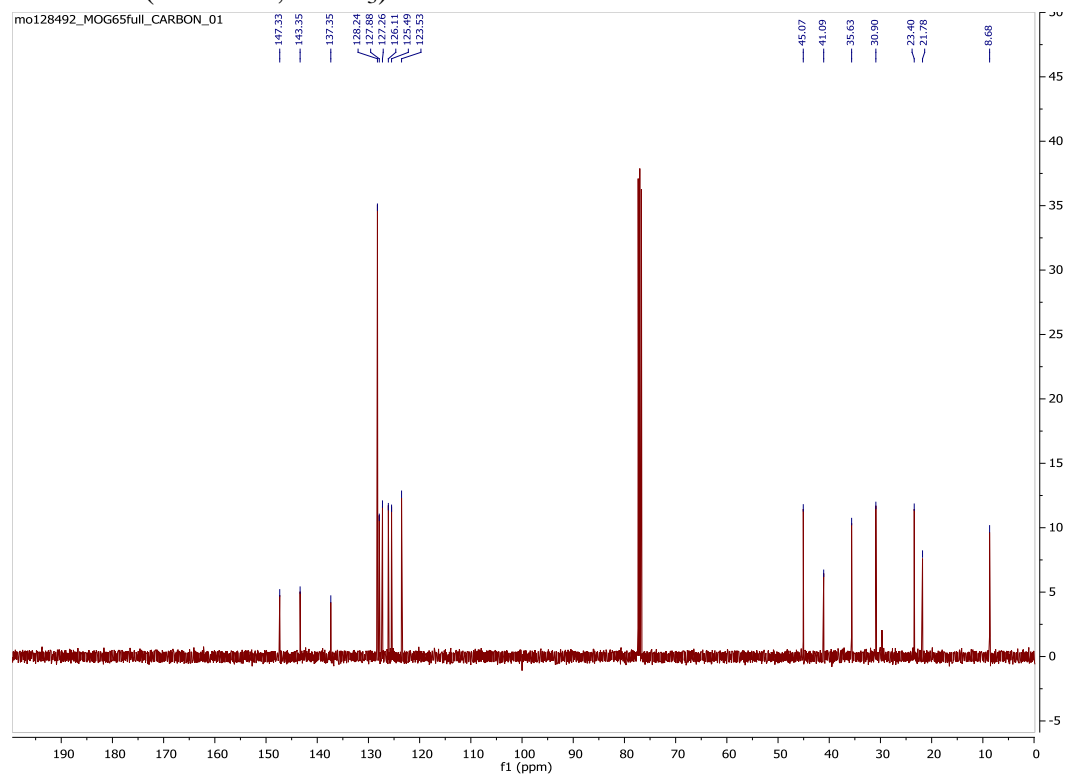

### Chiral HPLC traces: racemic

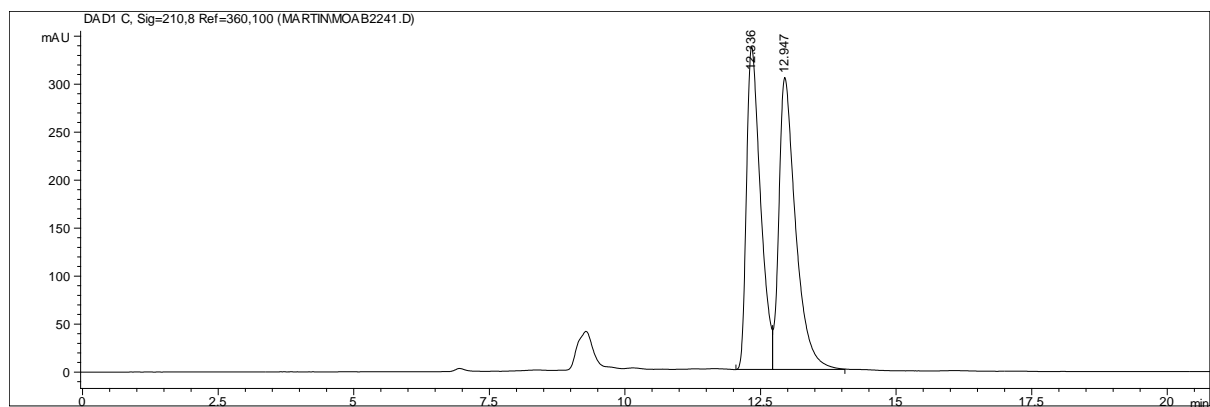

### Chiral HPLC traces: enantioenriched

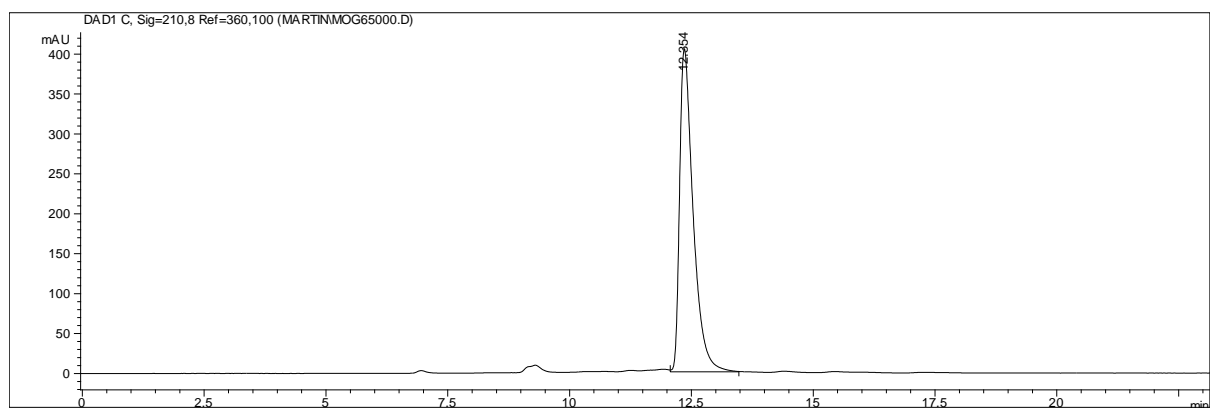

13b

<sup>1</sup>H NMR (400 MHz, CDCl<sub>3</sub>)

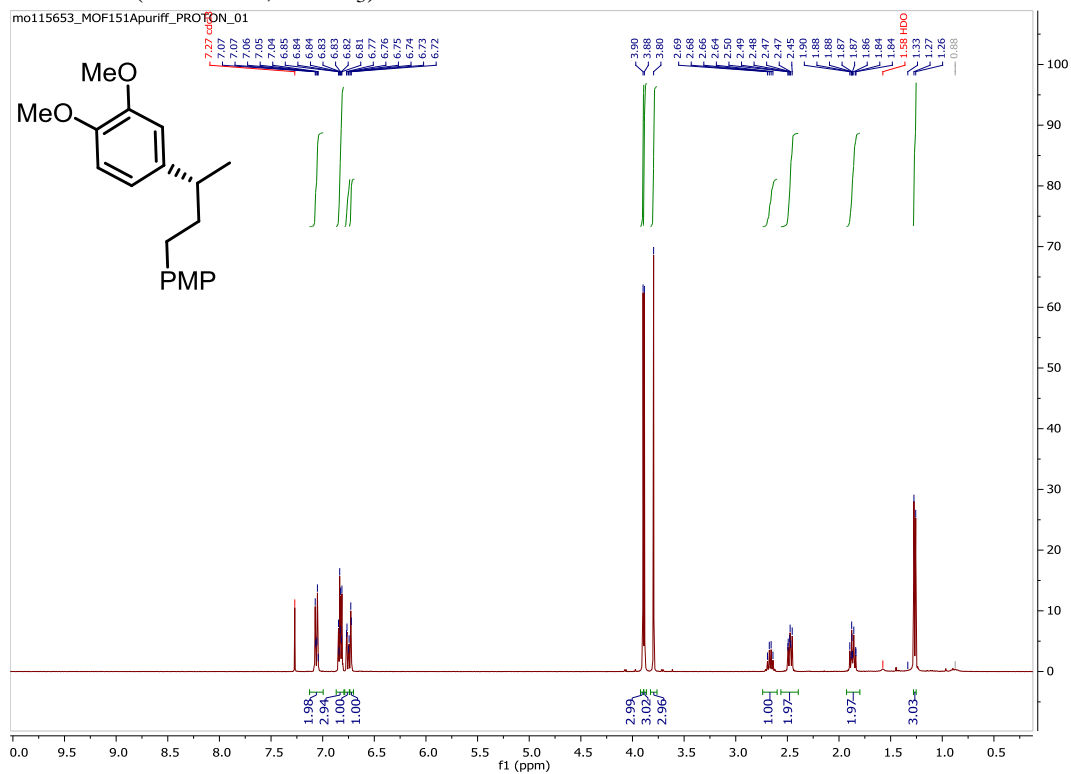

<sup>13</sup>C NMR (100 MHz, CDCl<sub>3</sub>)

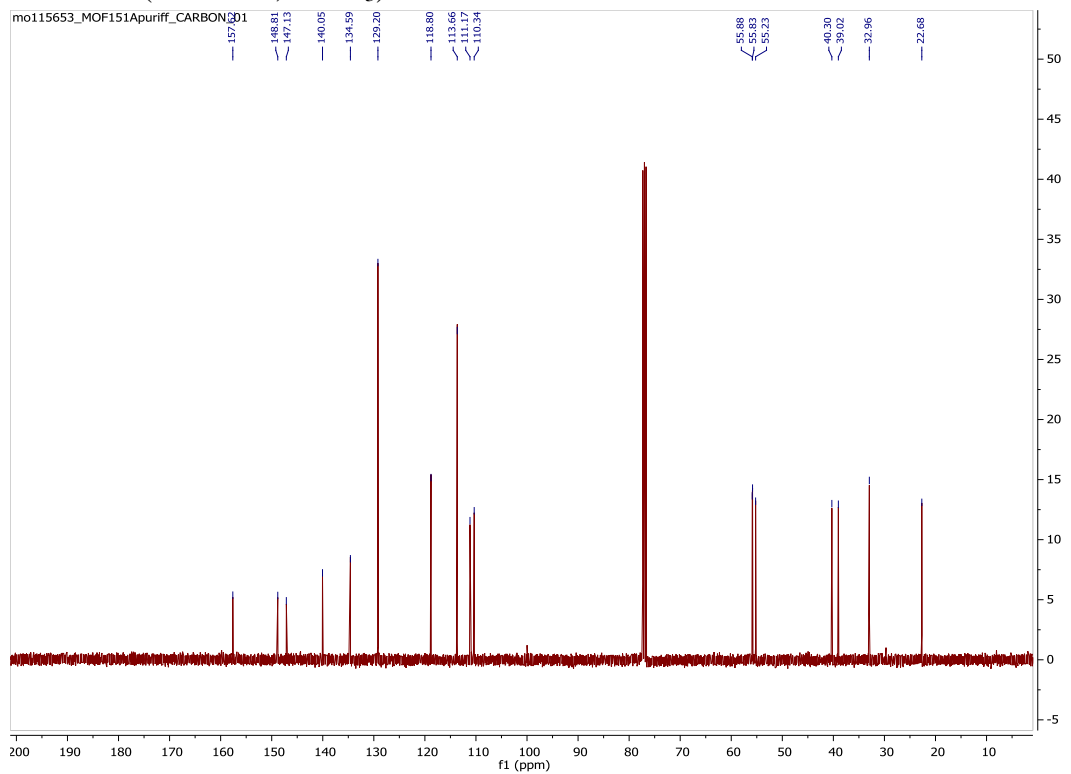

### Chiral HPLC traces: racemic

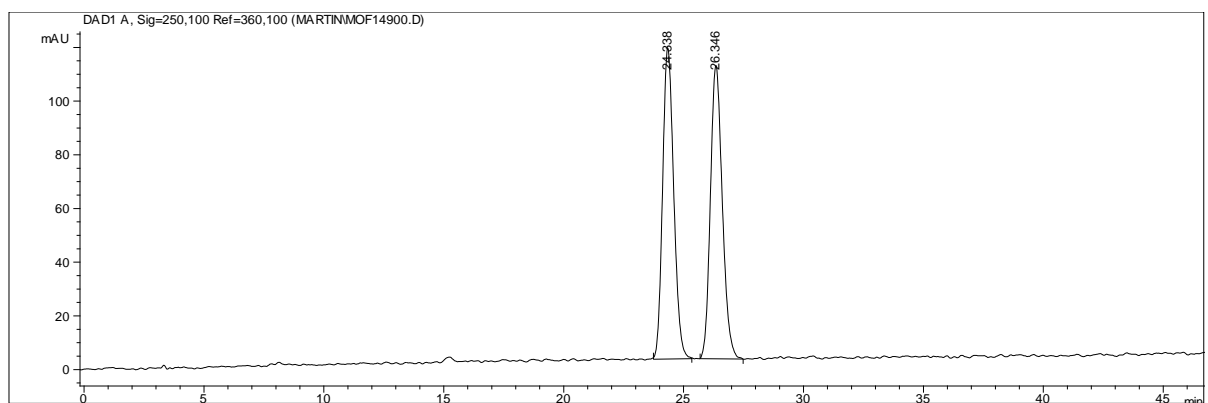

### Chiral HPLC traces: enantioenriched

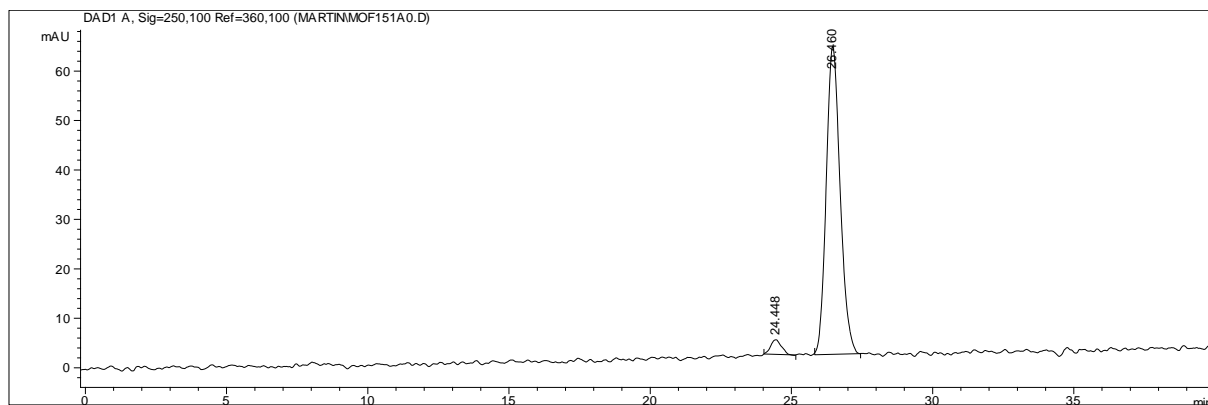

12b

<sup>1</sup>H NMR (400 MHz, CDCl<sub>3</sub>)

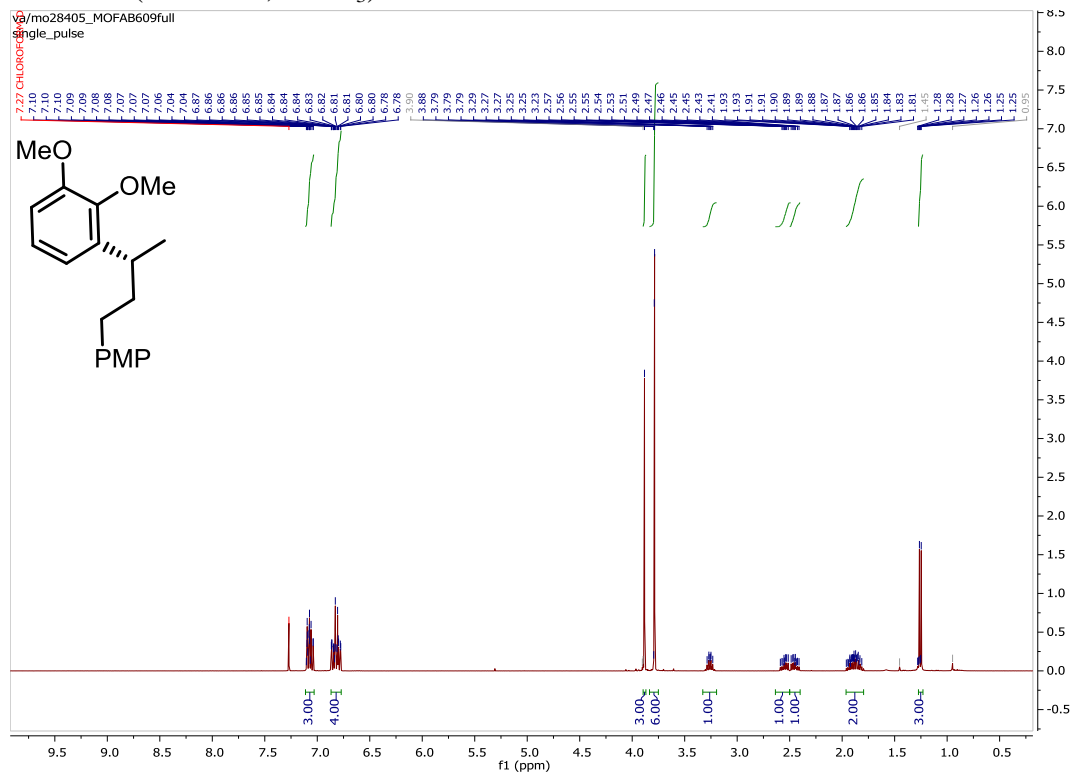

<sup>13</sup>C NMR (100 MHz, CDCl<sub>3</sub>)

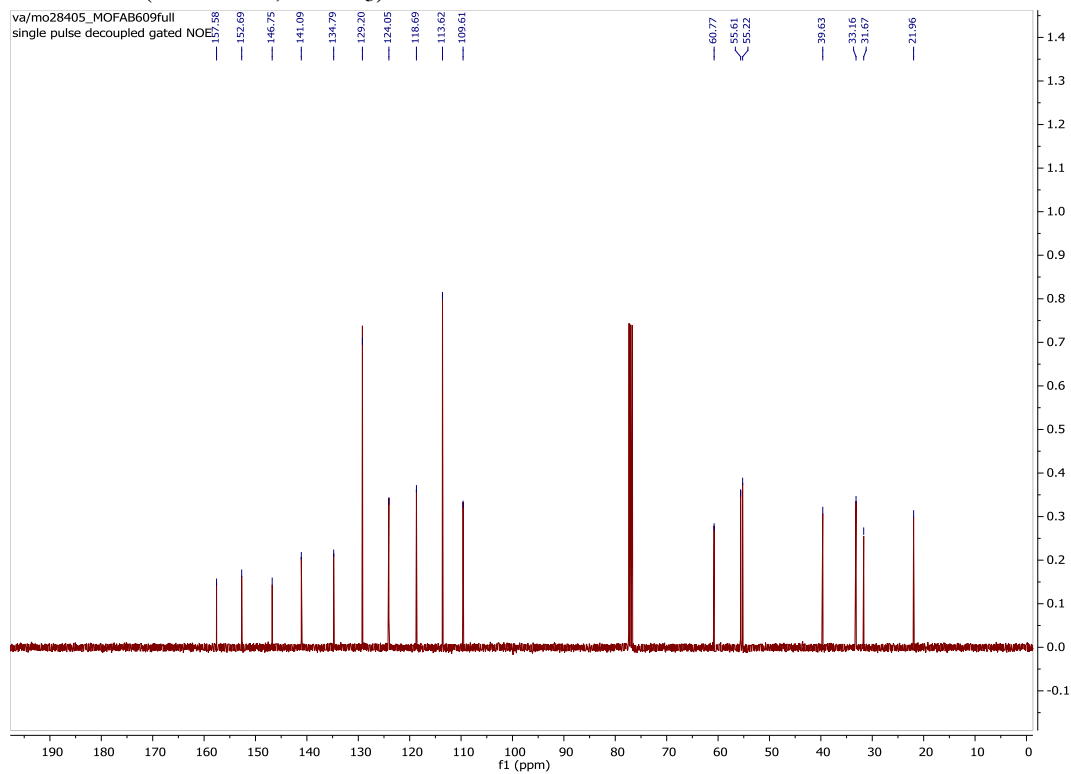

### Chiral HPLC traces: racemic

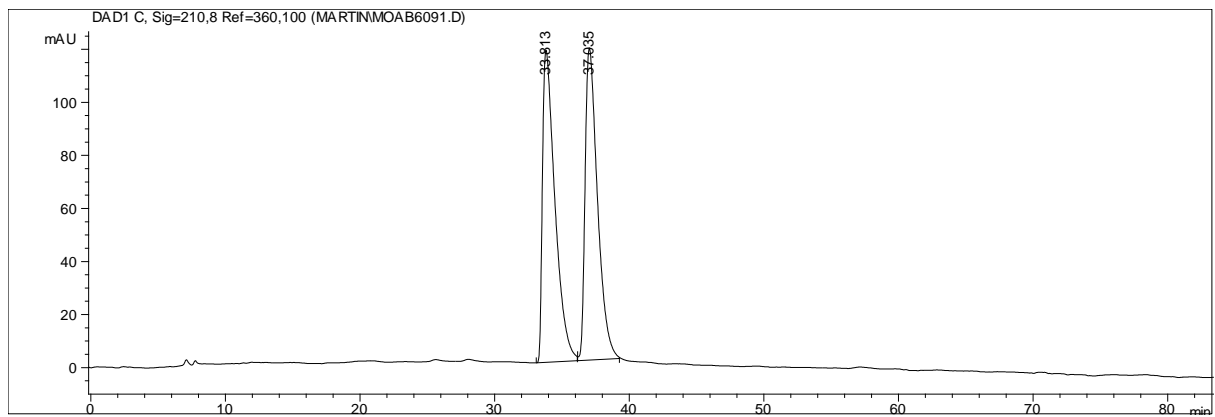

### Chiral HPLC traces: enantioenriched

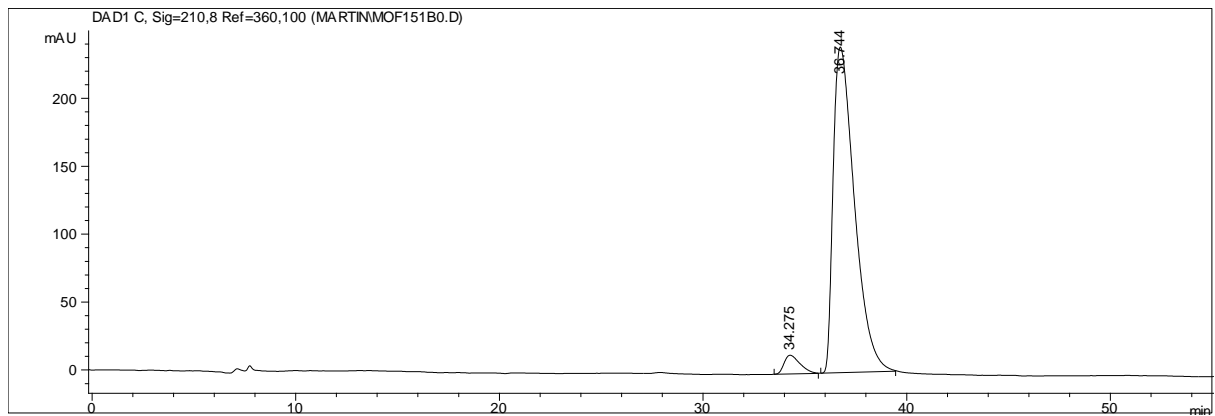



14b

<sup>1</sup>H NMR (400 MHz, CDCl<sub>3</sub>)

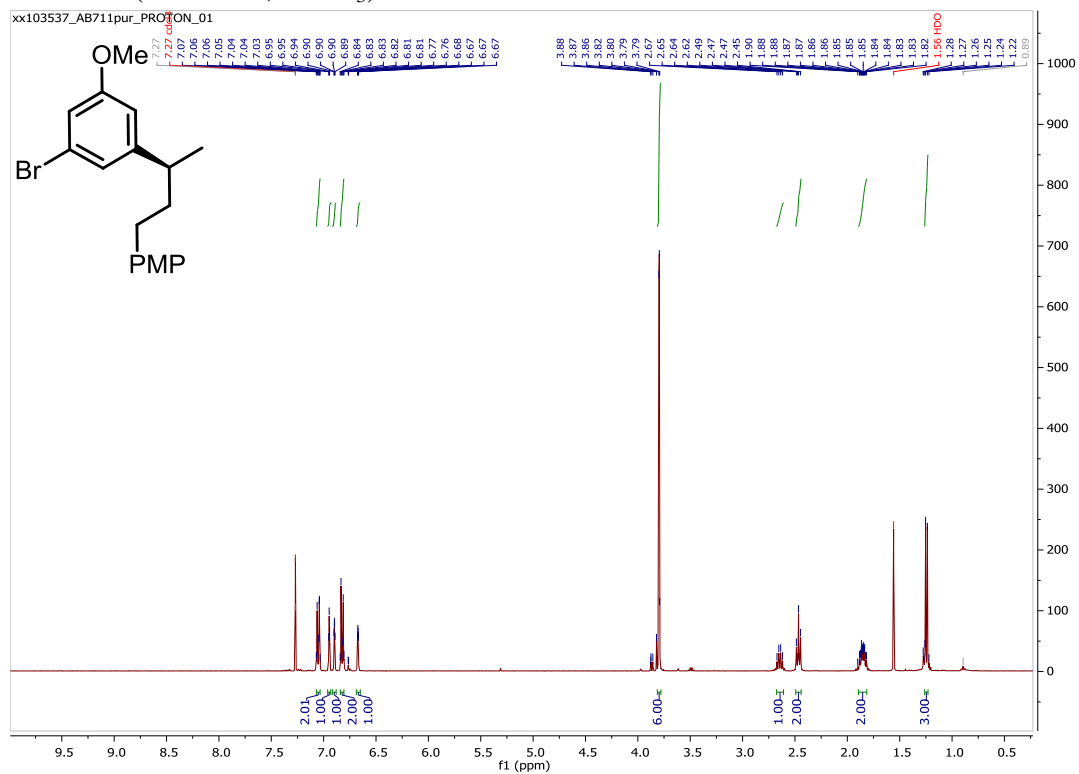

<sup>13</sup>C NMR (100 MHz, CDCl<sub>3</sub>)

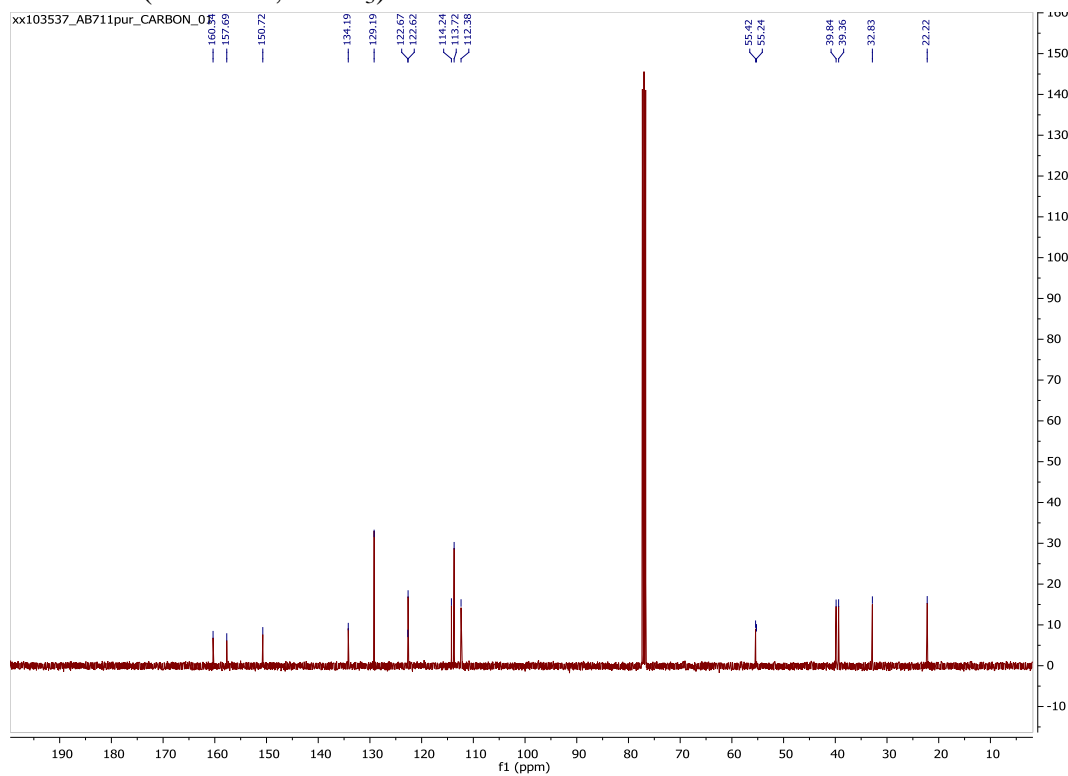

### Chiral HPLC traces: racemic

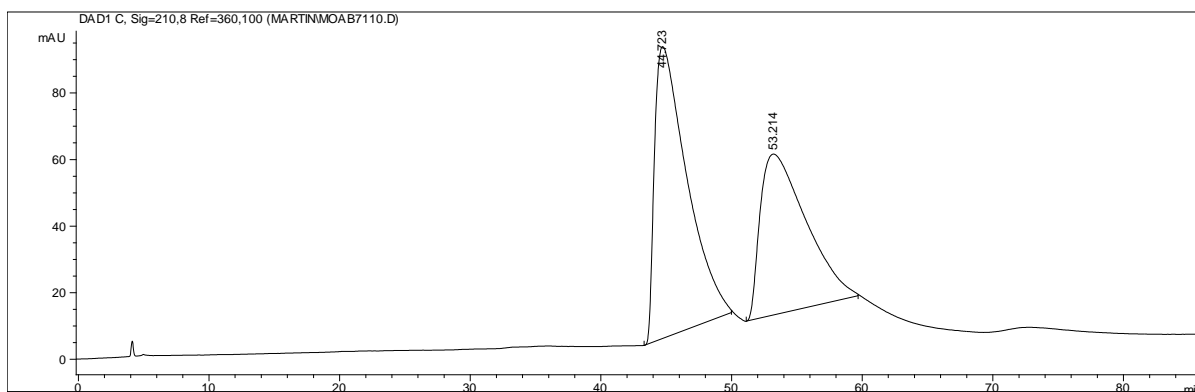

### Chiral HPLC traces: enantioenriched

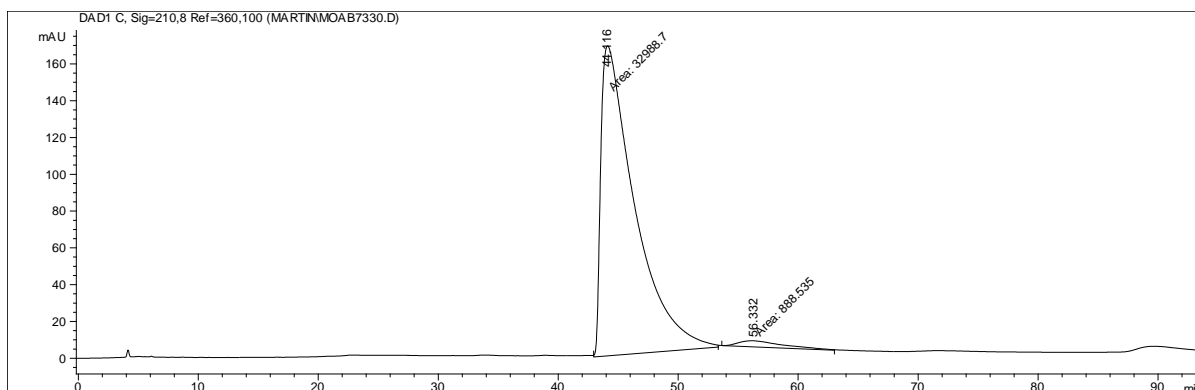

15a

$^1\text{H}$  NMR (400 MHz,  $\text{CDCl}_3$ )

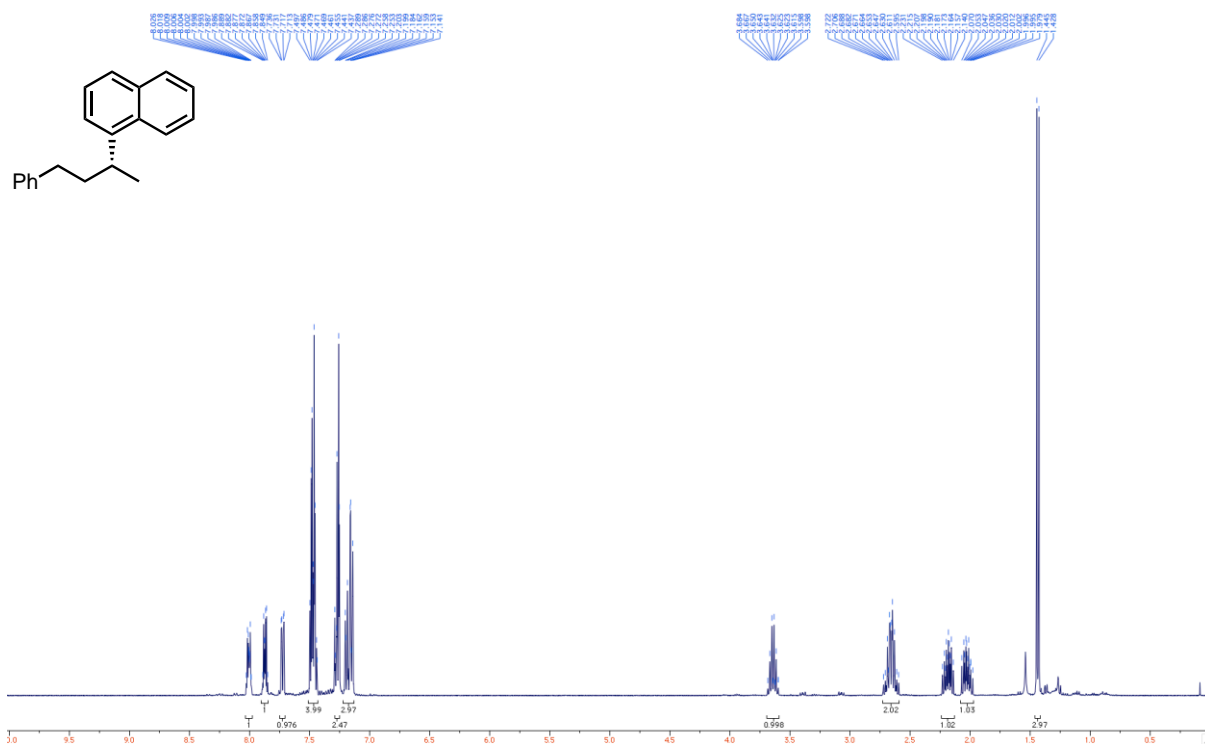

$^{13}\text{C}$  NMR (100 MHz,  $\text{CDCl}_3$ )

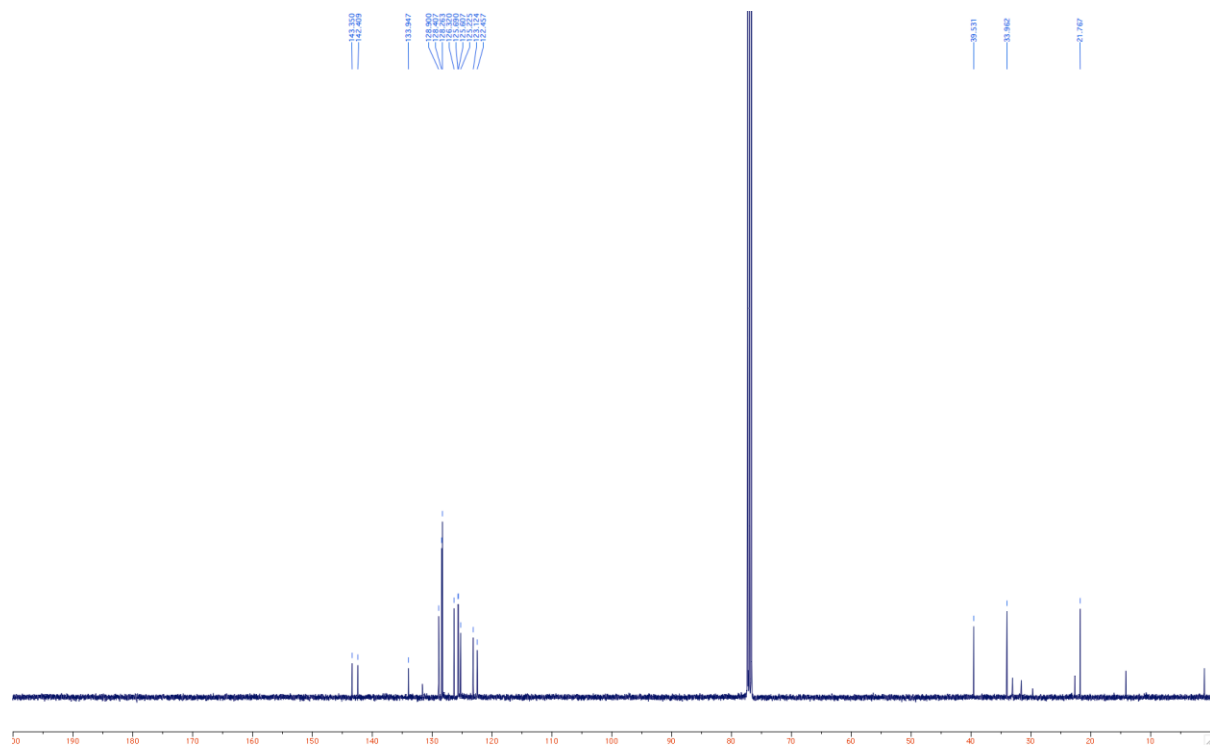

Chiral HPLC traces: racemic

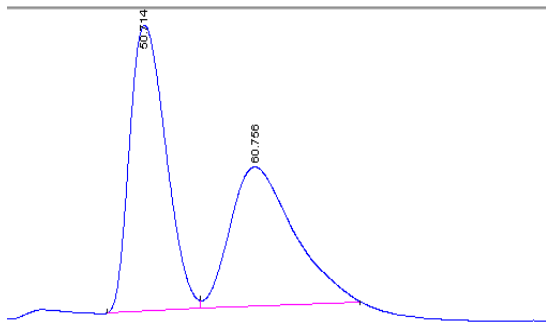

Chiral HPLC traces: enantioenriched

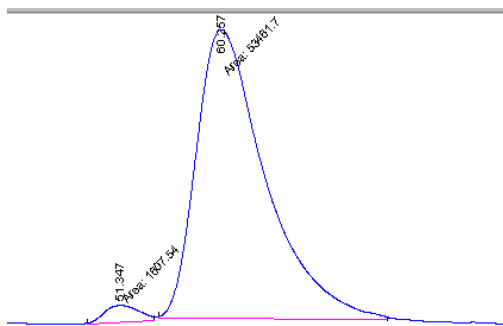

15g

$^1\text{H}$  NMR (400 MHz,  $\text{CDCl}_3$ )

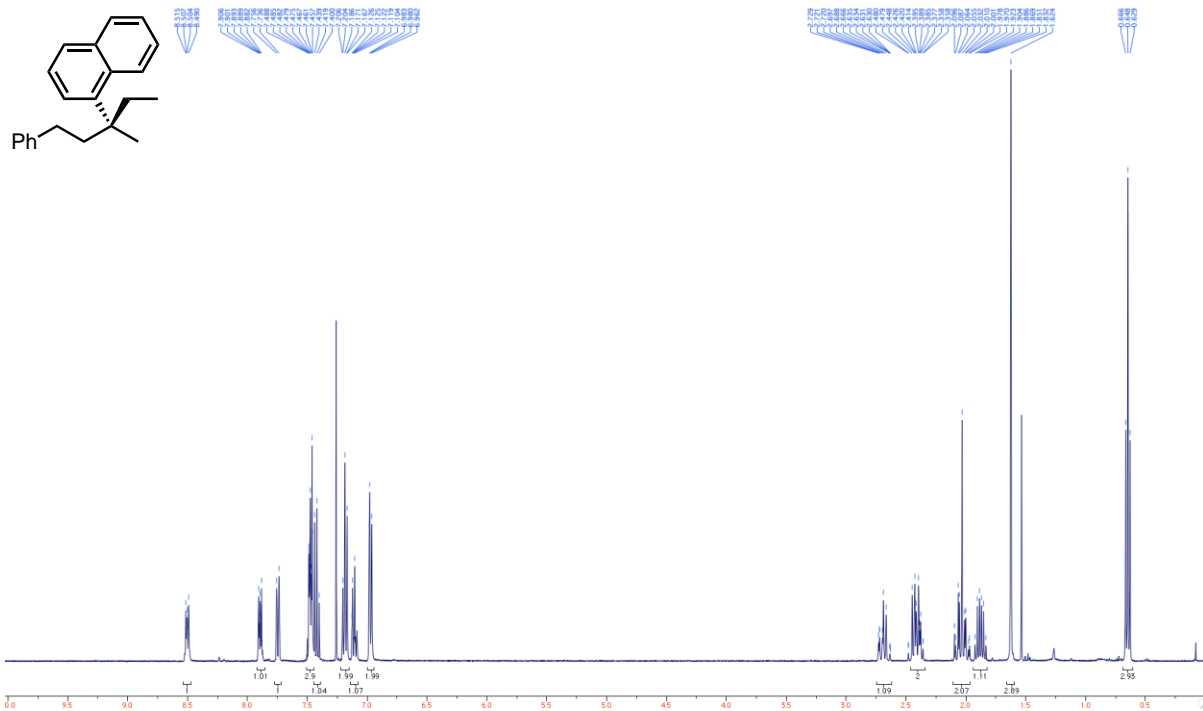

$^{13}\text{C}$  NMR (100 MHz,  $\text{CDCl}_3$ )

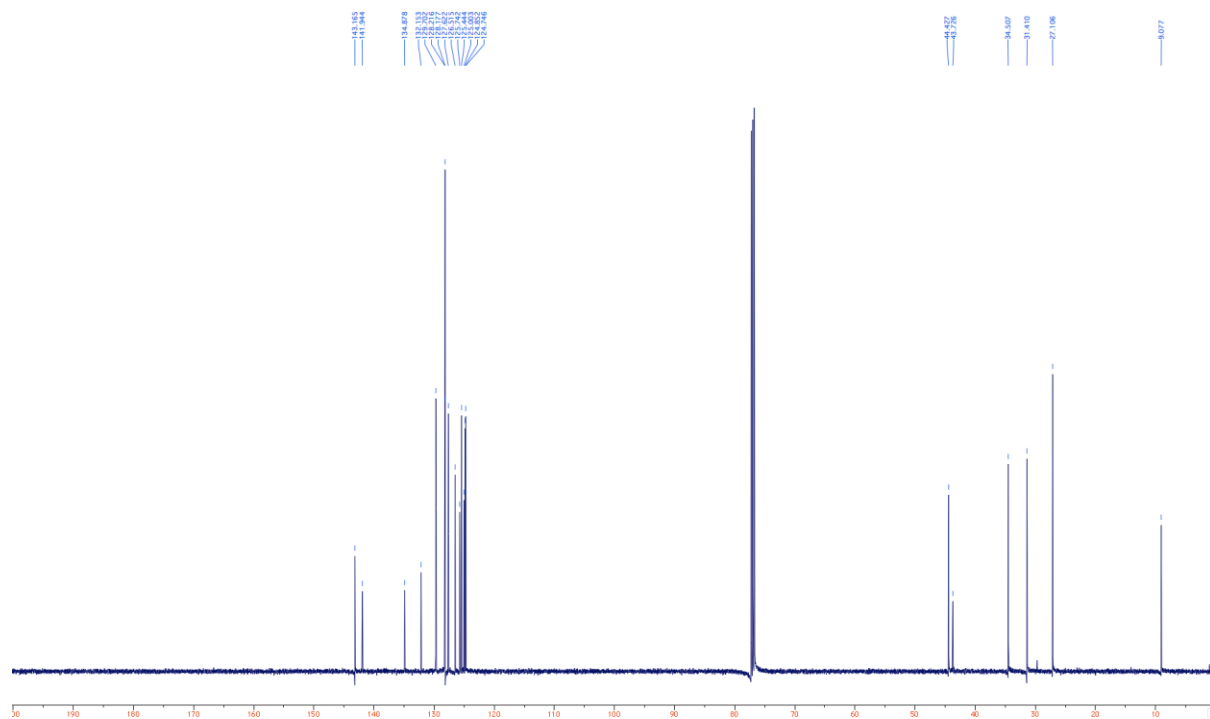

### Chiral HPLC traces: racemic

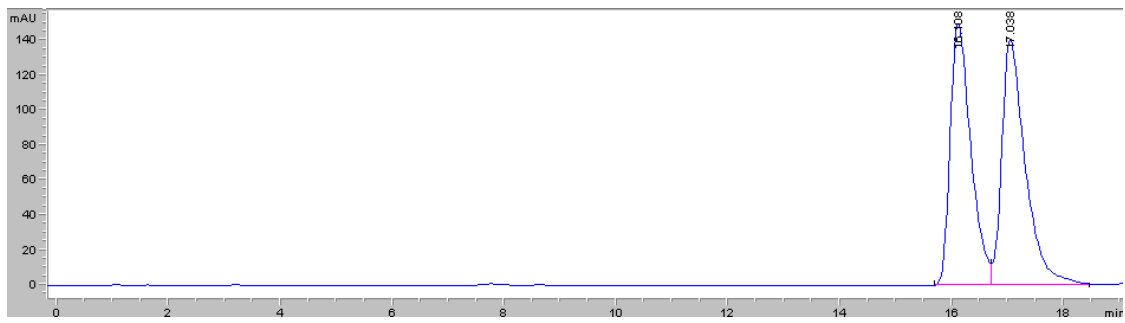

### Chiral HPLC traces: enantioenriched

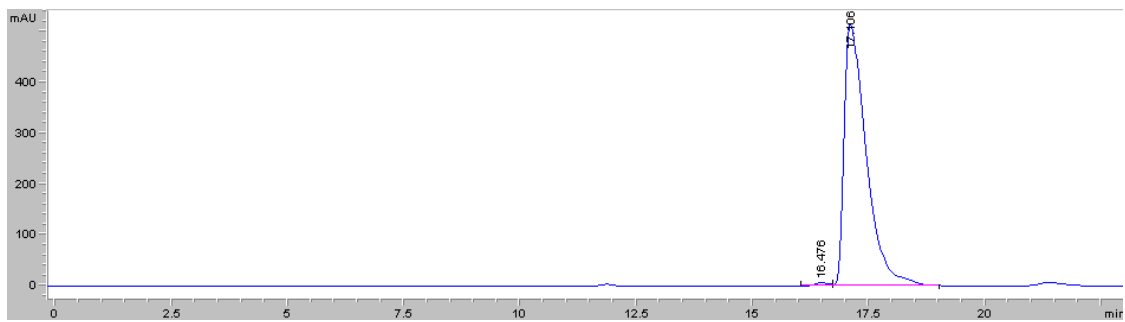

16b

<sup>1</sup>H NMR (400 MHz, CDCl<sub>3</sub>)

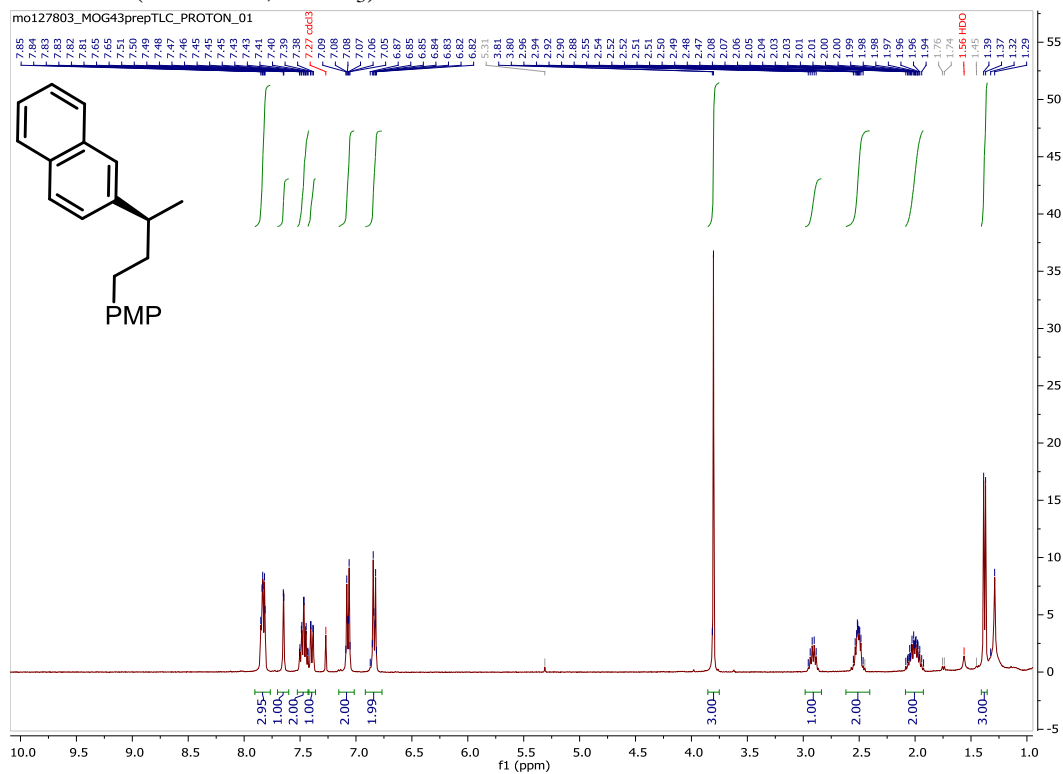

<sup>13</sup>C NMR (100 MHz, CDCl<sub>3</sub>)

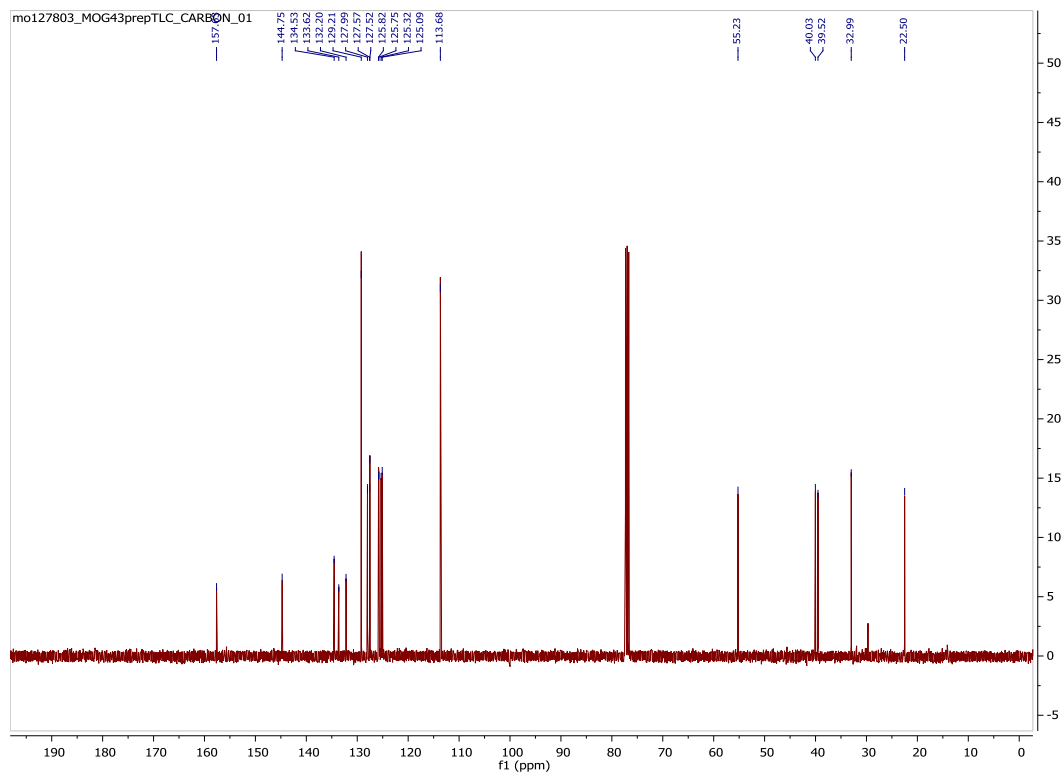

# 16b-[OH]

## <sup>1</sup>H NMR (400 MHz, CDCl<sub>3</sub>)

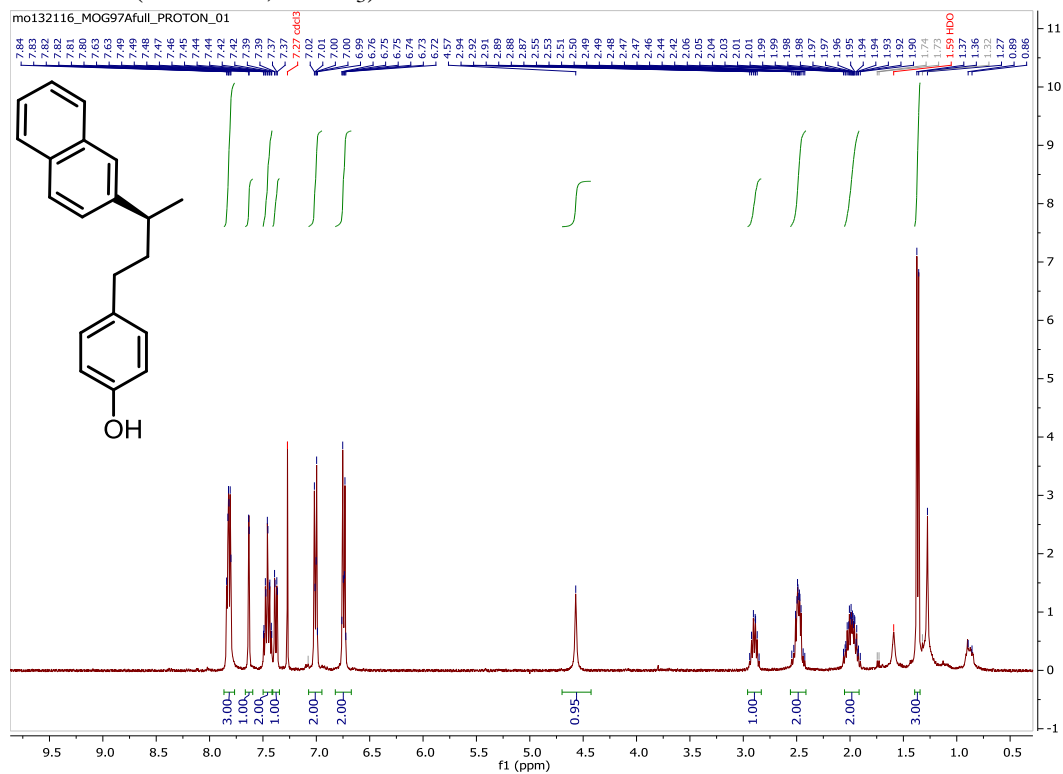

## <sup>13</sup>C NMR (100 MHz, CDCl<sub>3</sub>)

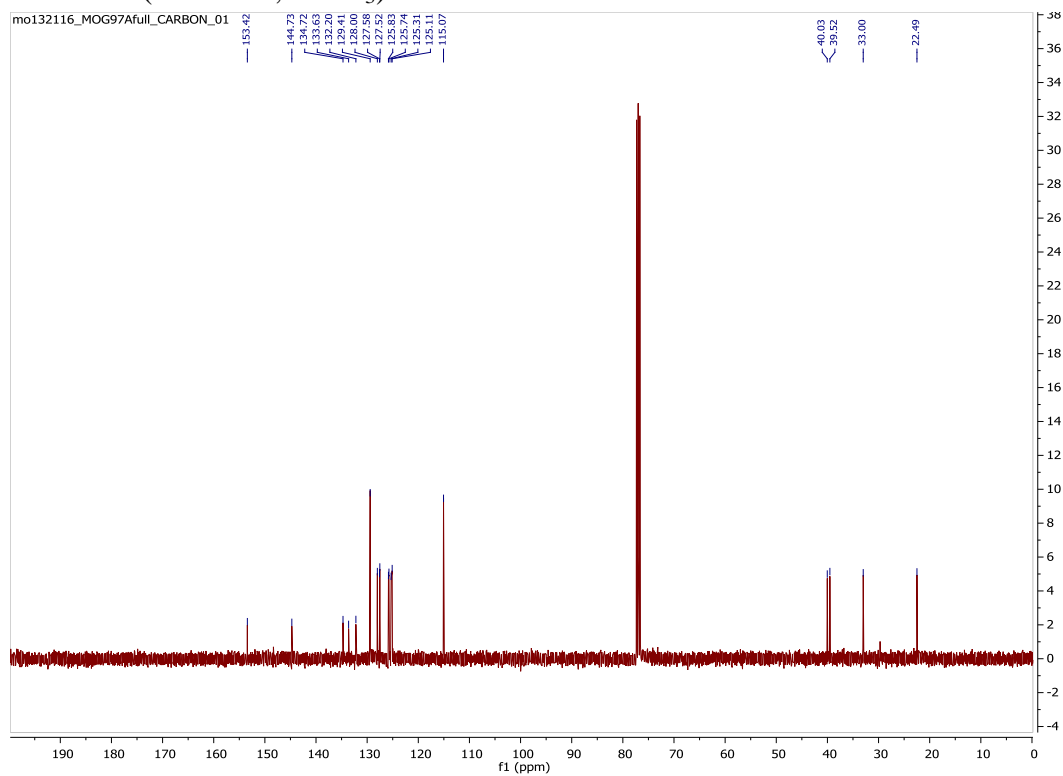



### Chiral SFC traces: racemic

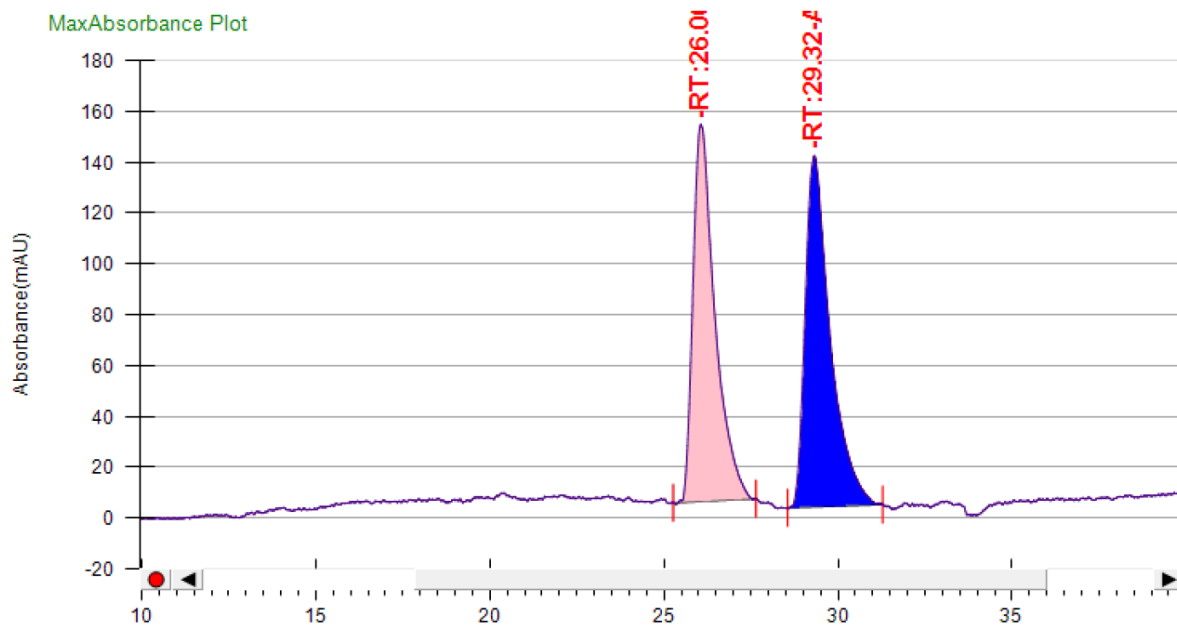

### Chiral SFC traces: enantioenriched

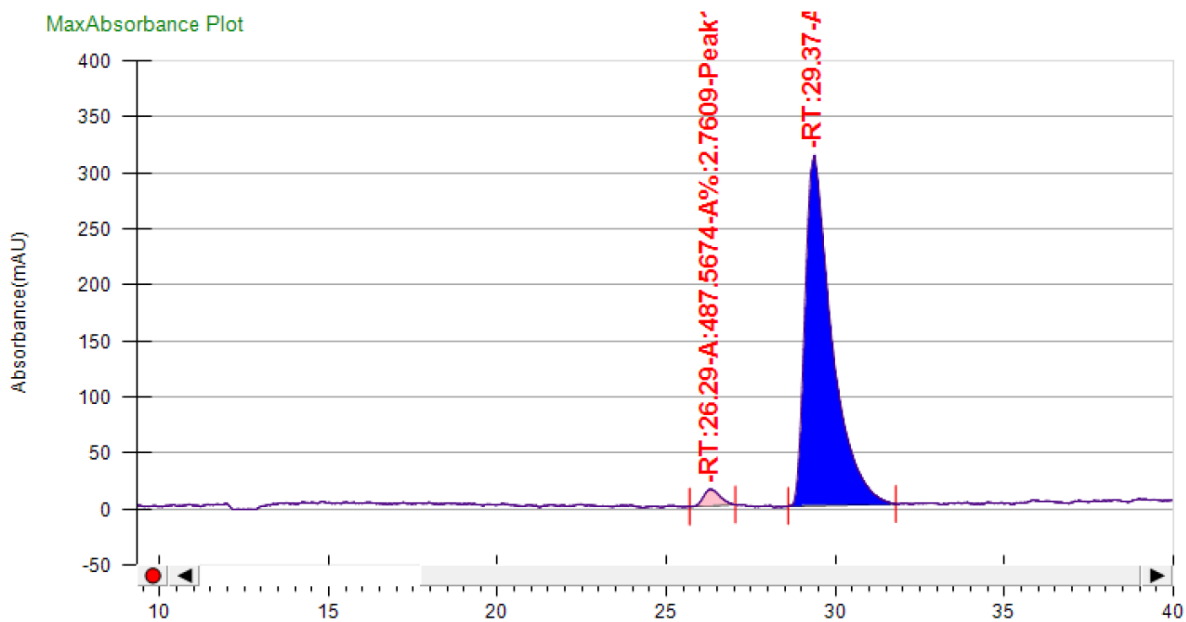

16g

<sup>1</sup>H NMR (400 MHz, CDCl<sub>3</sub>)

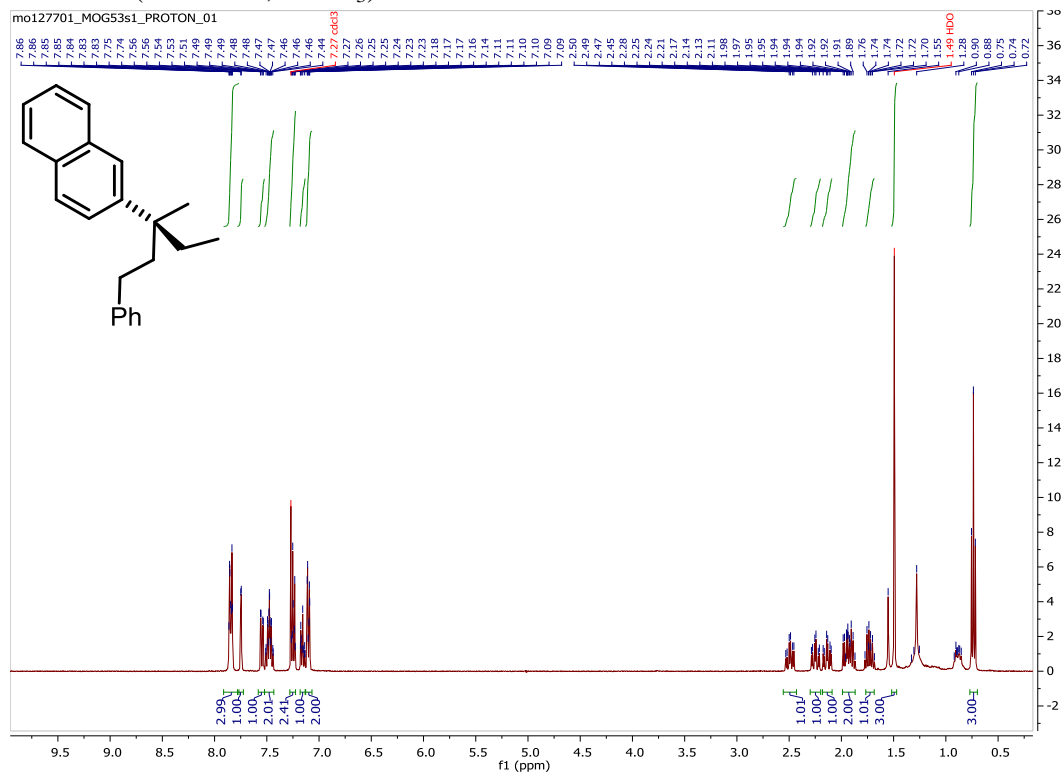

<sup>13</sup>C NMR (100 MHz, CDCl<sub>3</sub>)

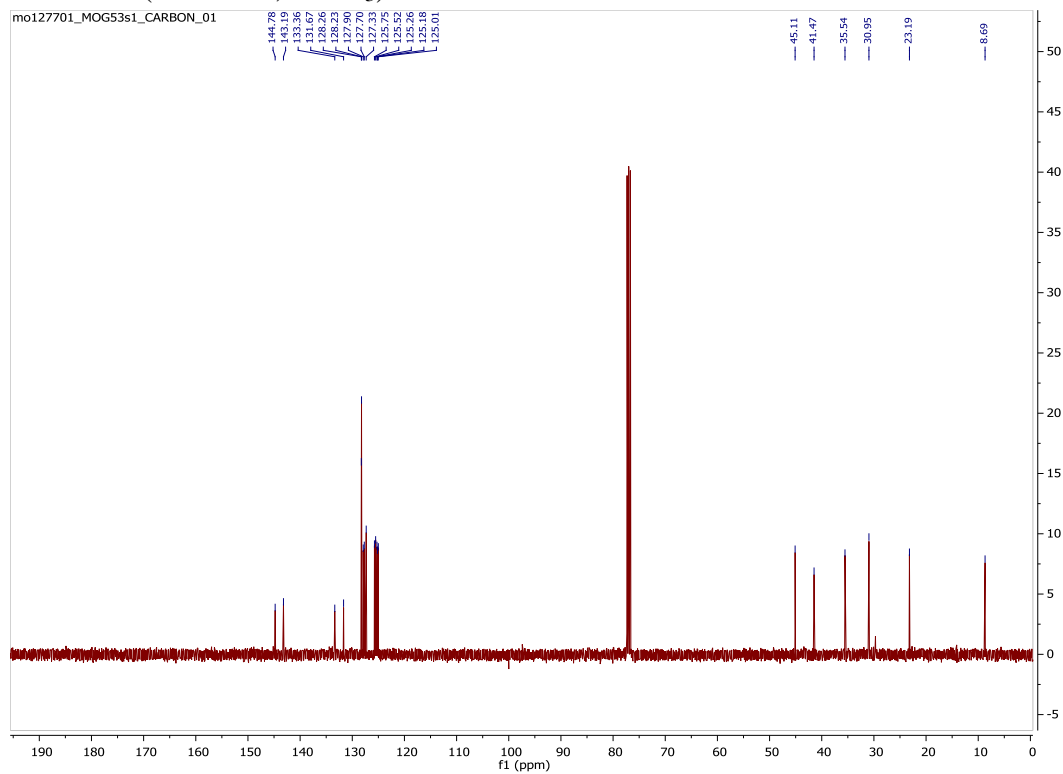

### Chiral SFC traces: racemic

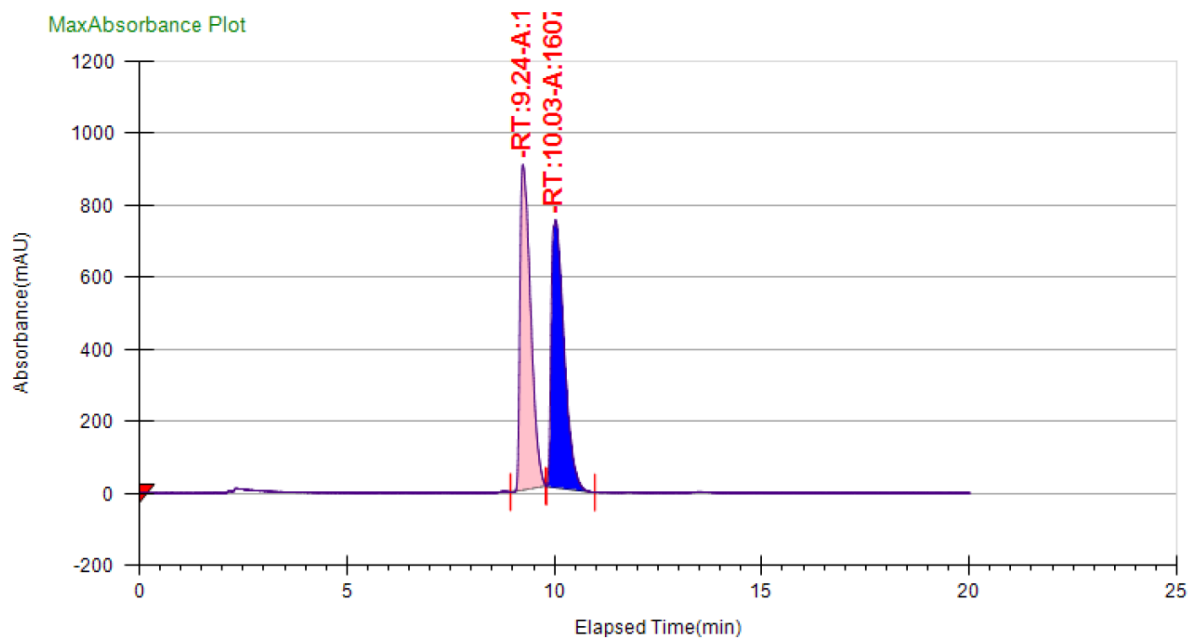

### Chiral SFC traces: enantioenriched

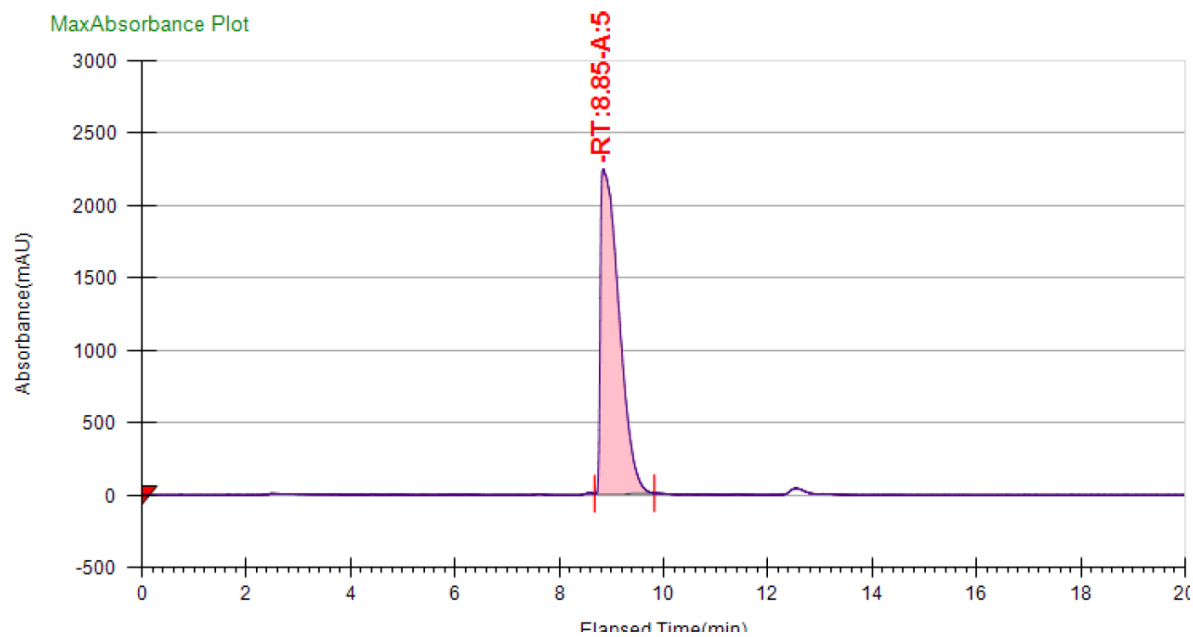



# 17b-[OH]

## <sup>1</sup>H NMR (400 MHz, CDCl<sub>3</sub>)

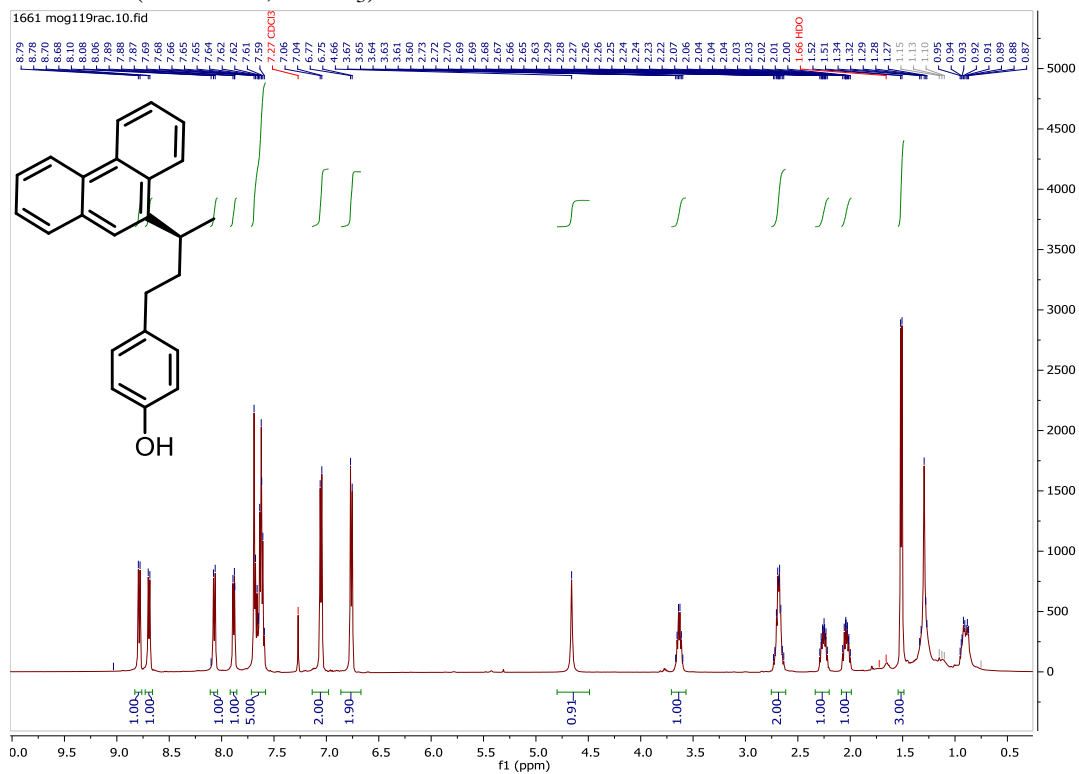

## <sup>13</sup>C NMR (100 MHz, CDCl<sub>3</sub>)

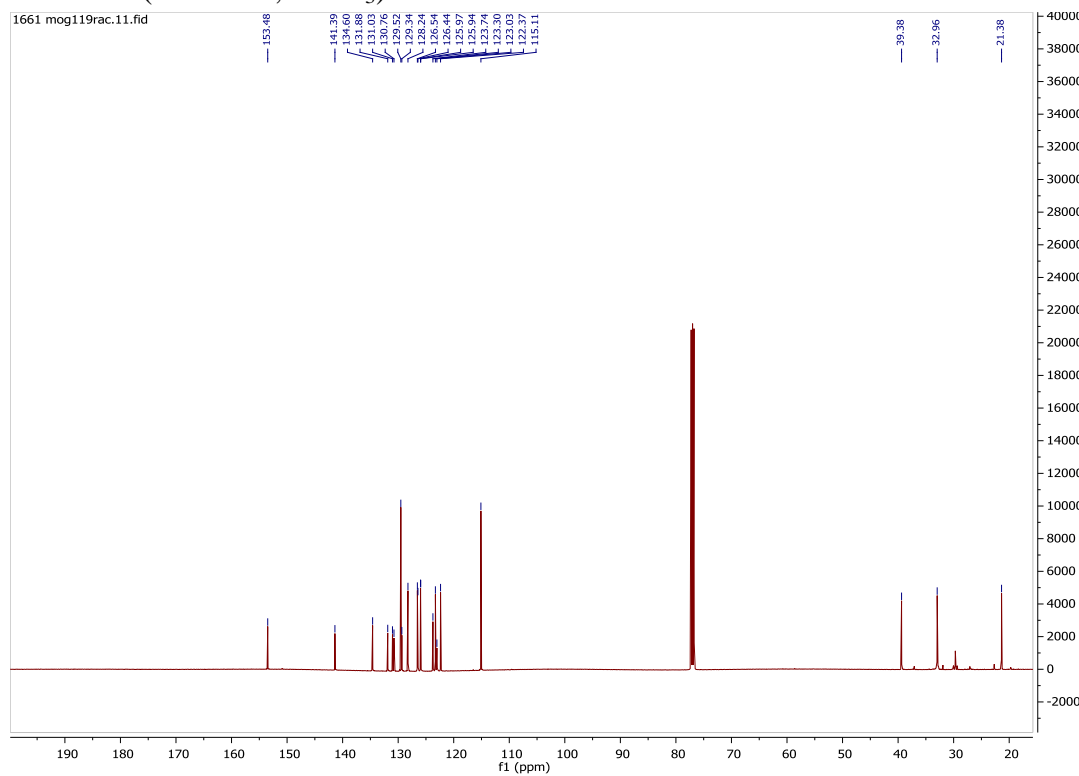

### Chiral HPLC traces: racemic

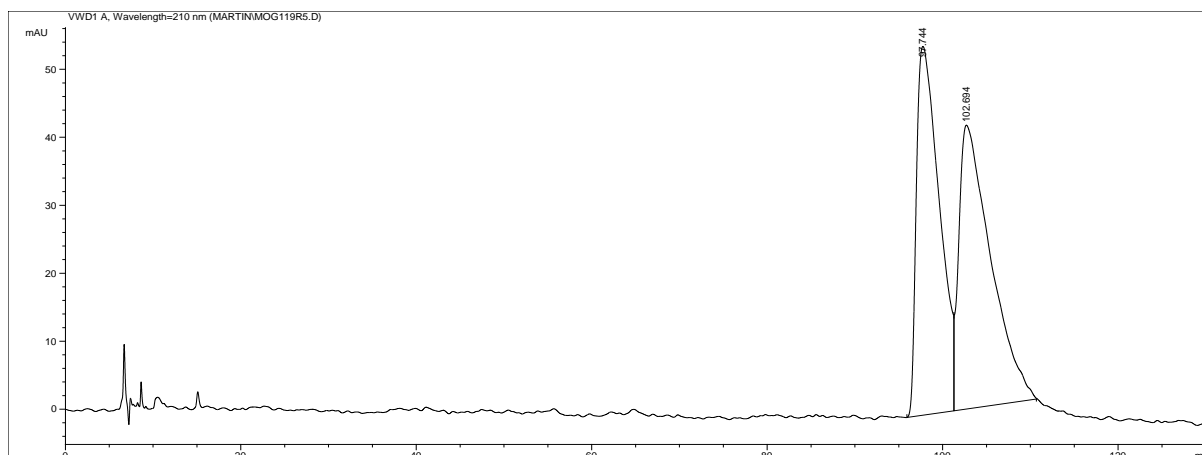

### Chiral HPLC traces: enantioenriched

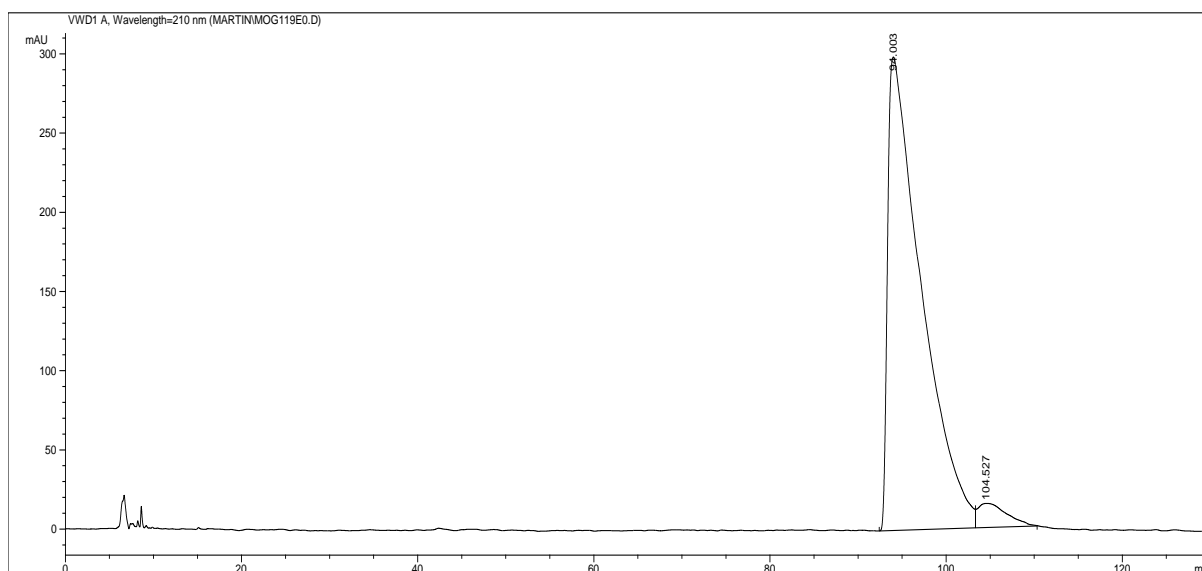

20b

<sup>1</sup>H NMR (400 MHz, CDCl<sub>3</sub>)

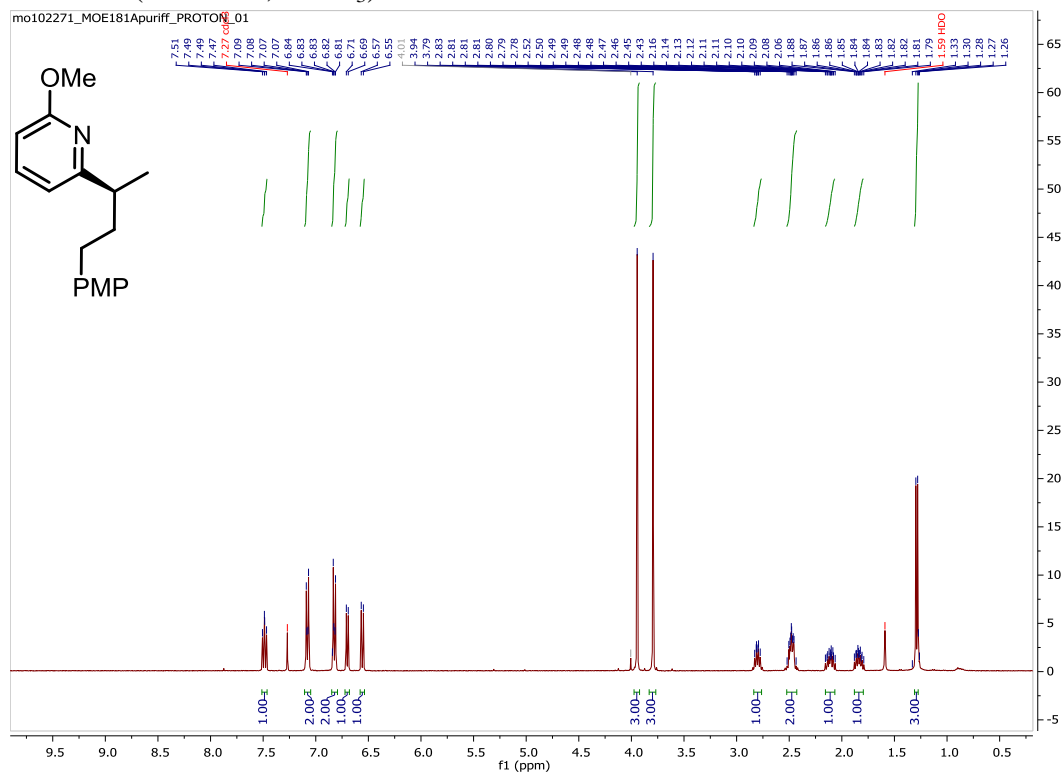

<sup>13</sup>C NMR (100 MHz, CDCl<sub>3</sub>)

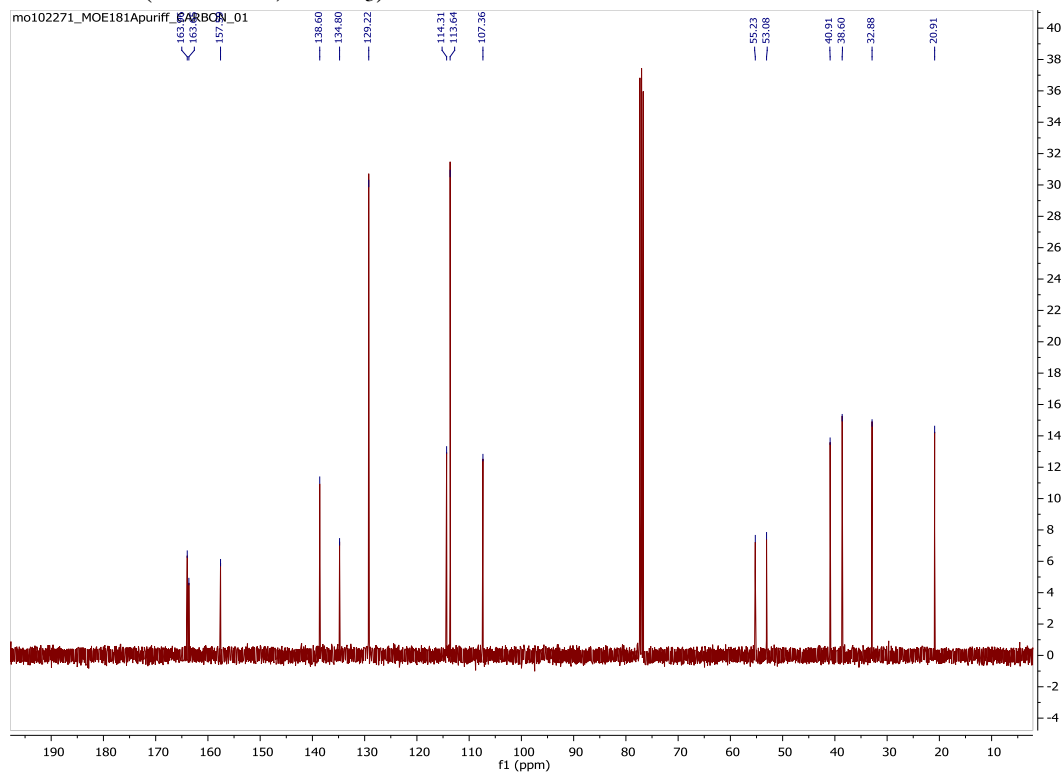

### Chiral HPLC traces: racemic

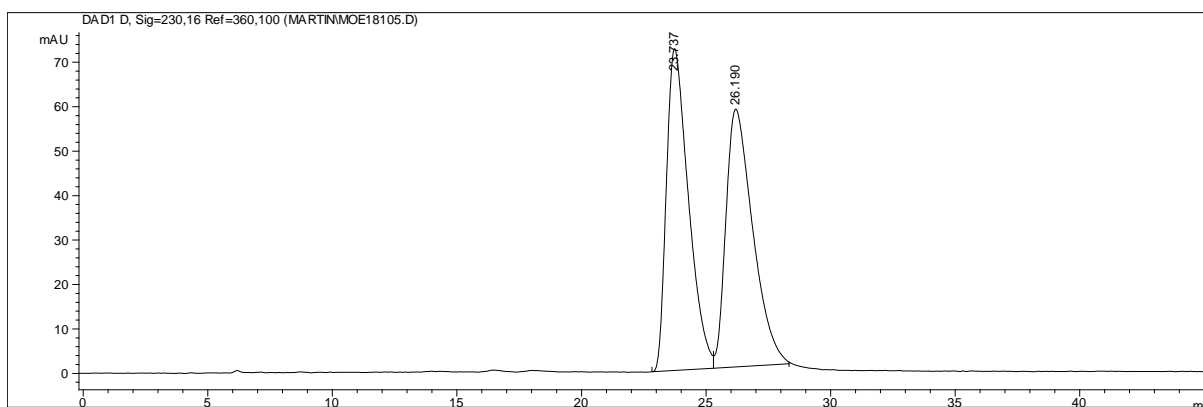

### Chiral HPLC traces: enantioenriched

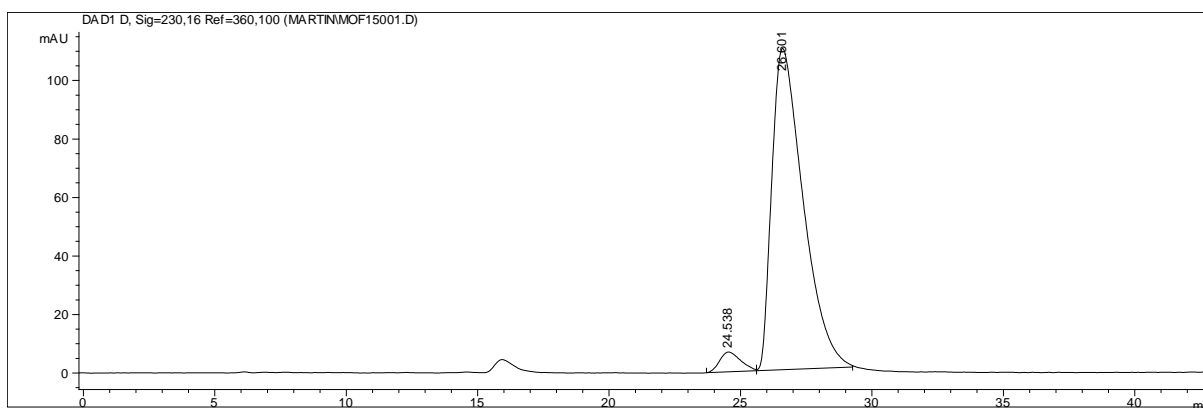



20g

$^1\text{H}$  NMR (400 MHz,  $\text{CDCl}_3$ )

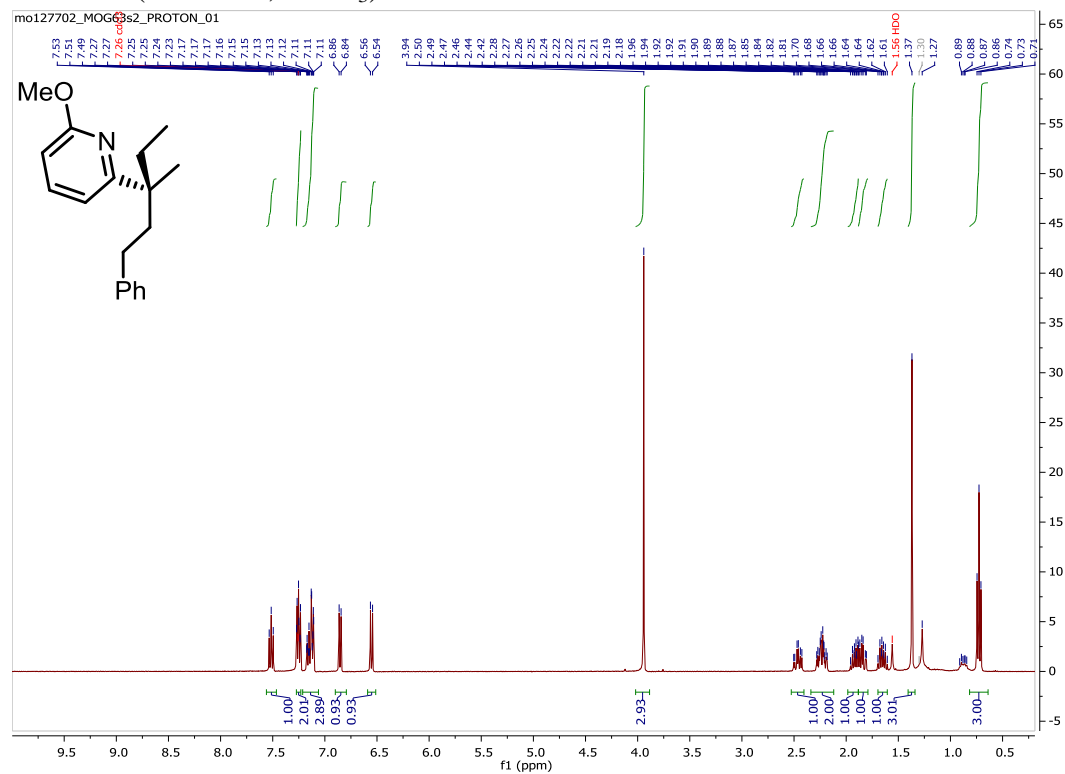

$^{13}\text{C}$  NMR (100 MHz,  $\text{CDCl}_3$ )

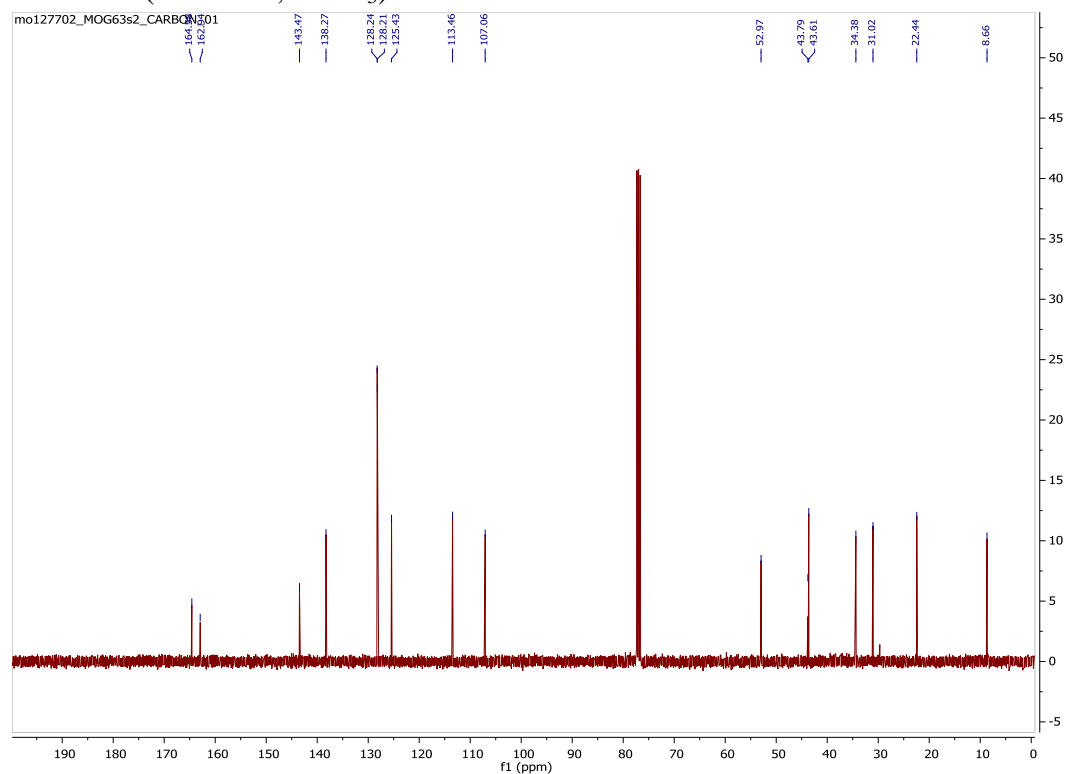

### Chiral HPLC traces: racemic

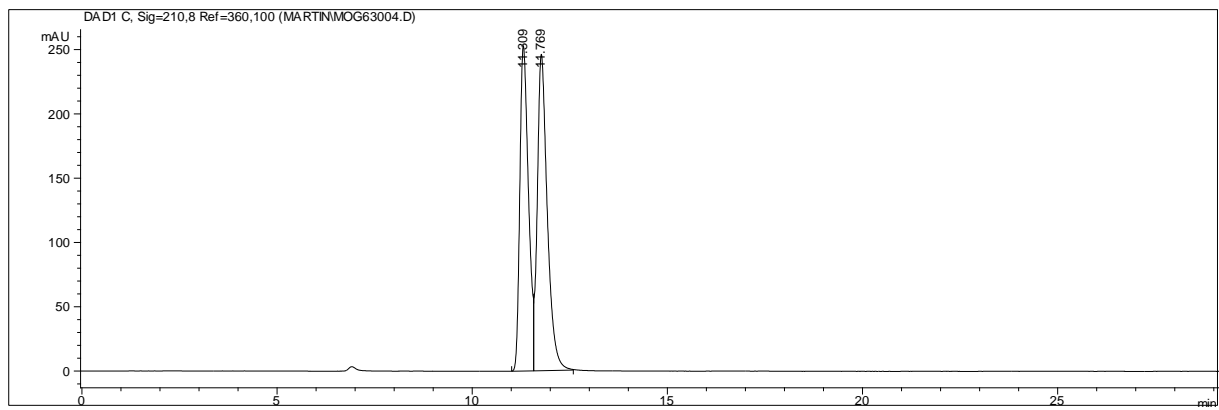

### Chiral HPLC traces: enantioenriched

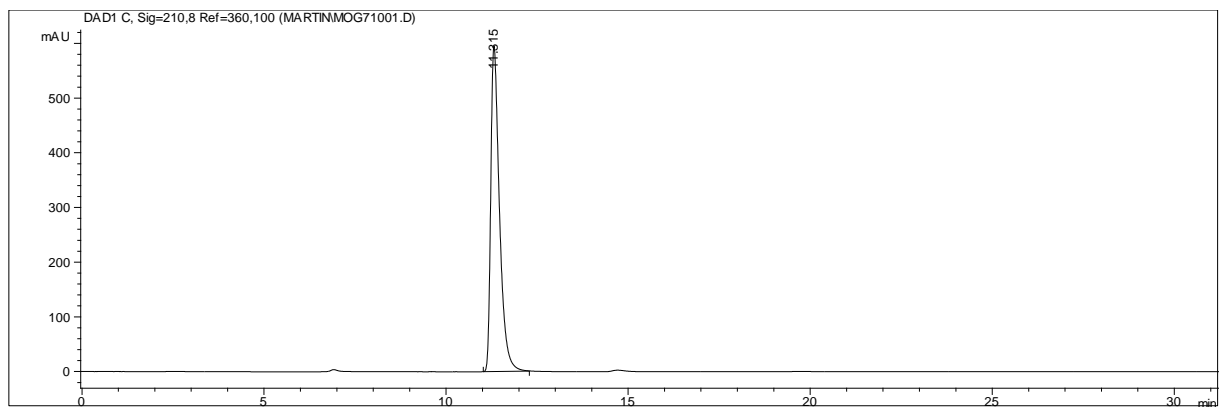



# $^{11}\text{B}$ NMR (96 MHz, NONE)<sup>8</sup>

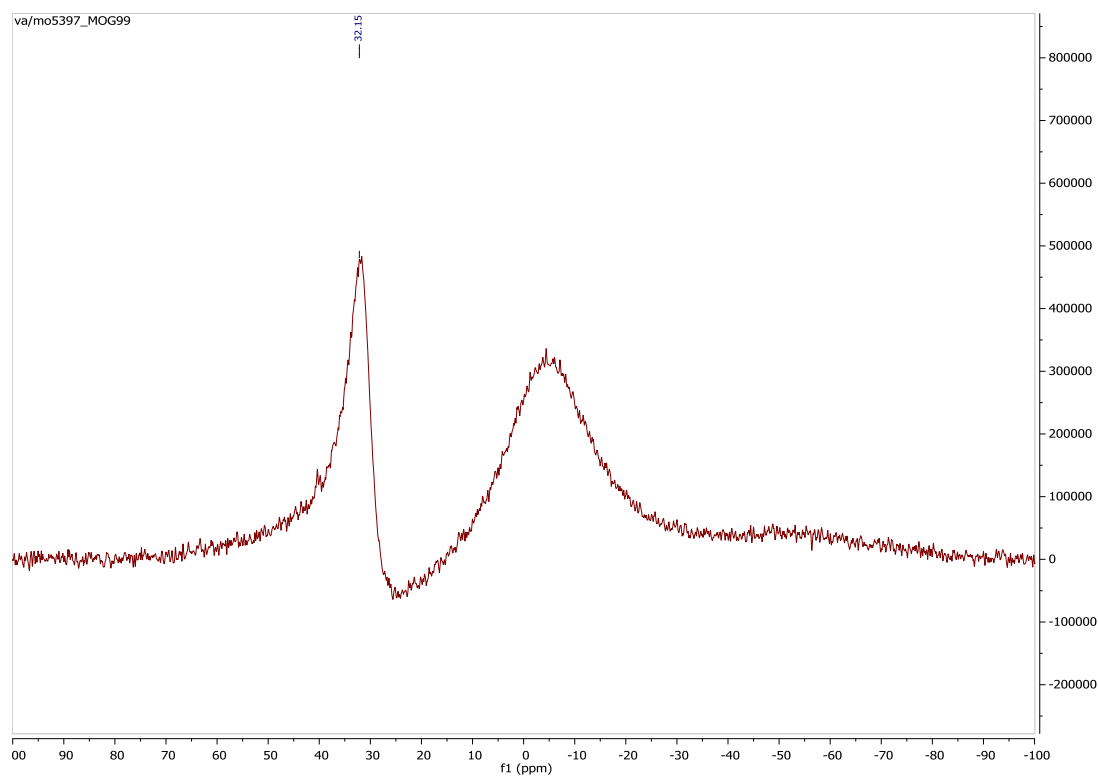

## Chiral HPLC traces: racemic

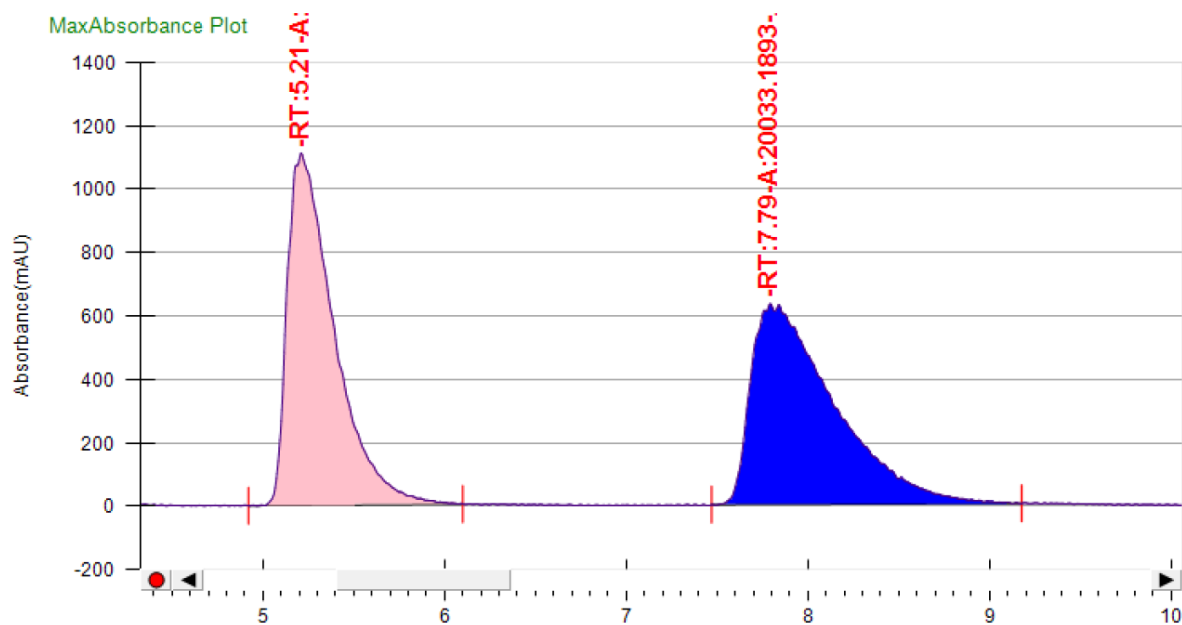

<sup>8</sup> The broad peak at -5 ppm is due to the use of standard NMR tube (contains borosilicates).

# Chiral HPLC traces: enantioenriched

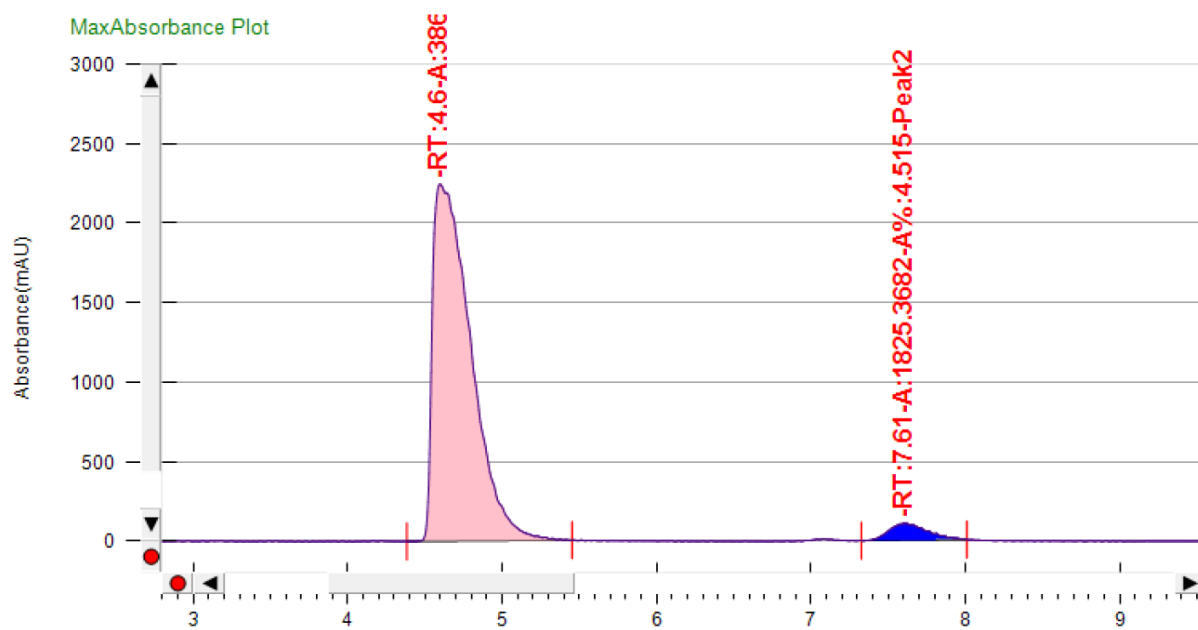

9ga

<sup>1</sup>H NMR (400 MHz, CDCl<sub>3</sub>)

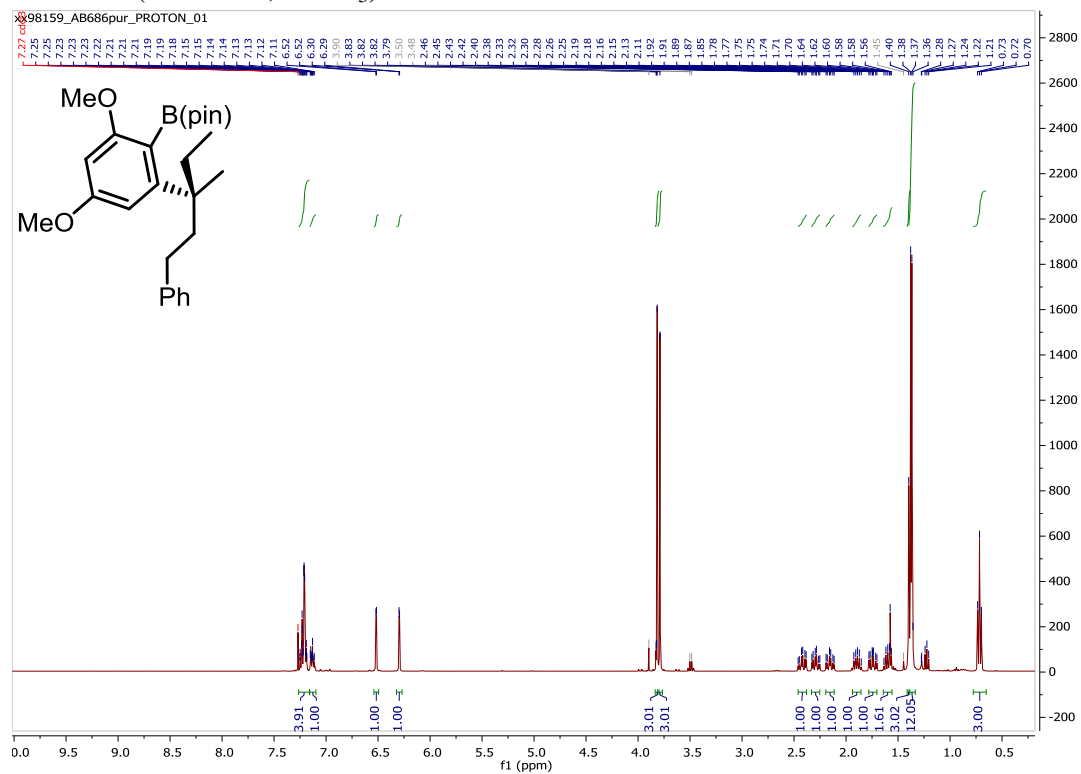

<sup>13</sup>C NMR (100 MHz, CDCl<sub>3</sub>)

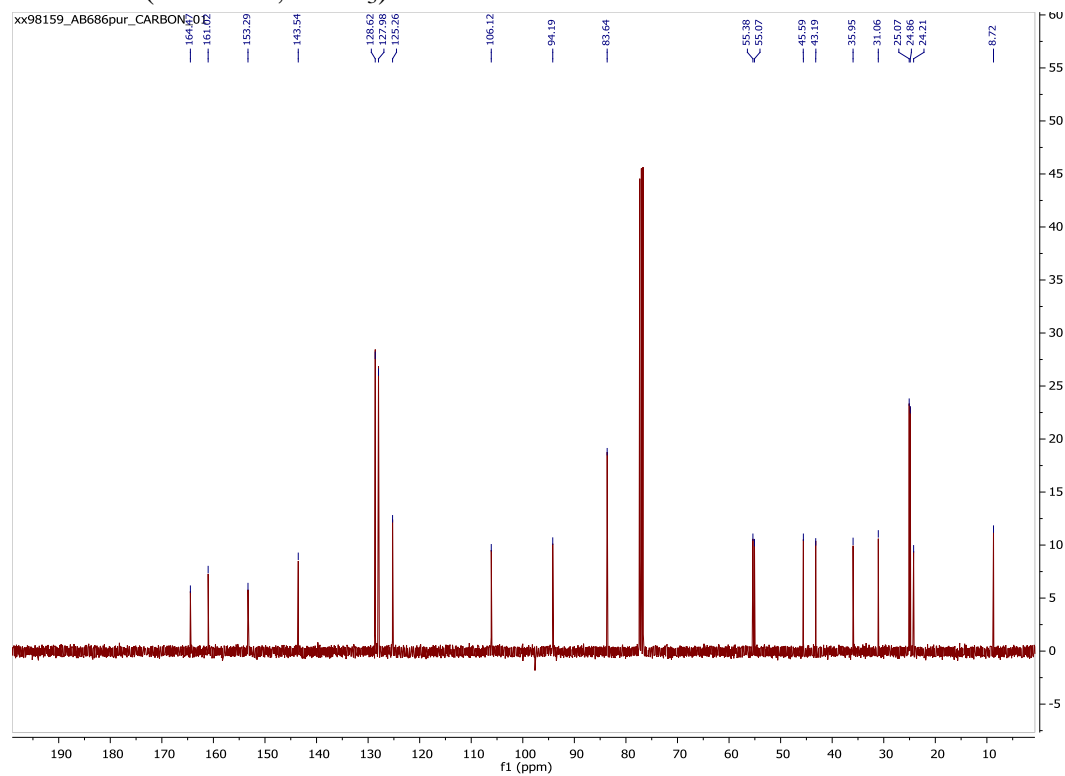

# $^{11}\text{B}$ NMR (96 MHz, $\text{CDCl}_3$ )<sup>9</sup>

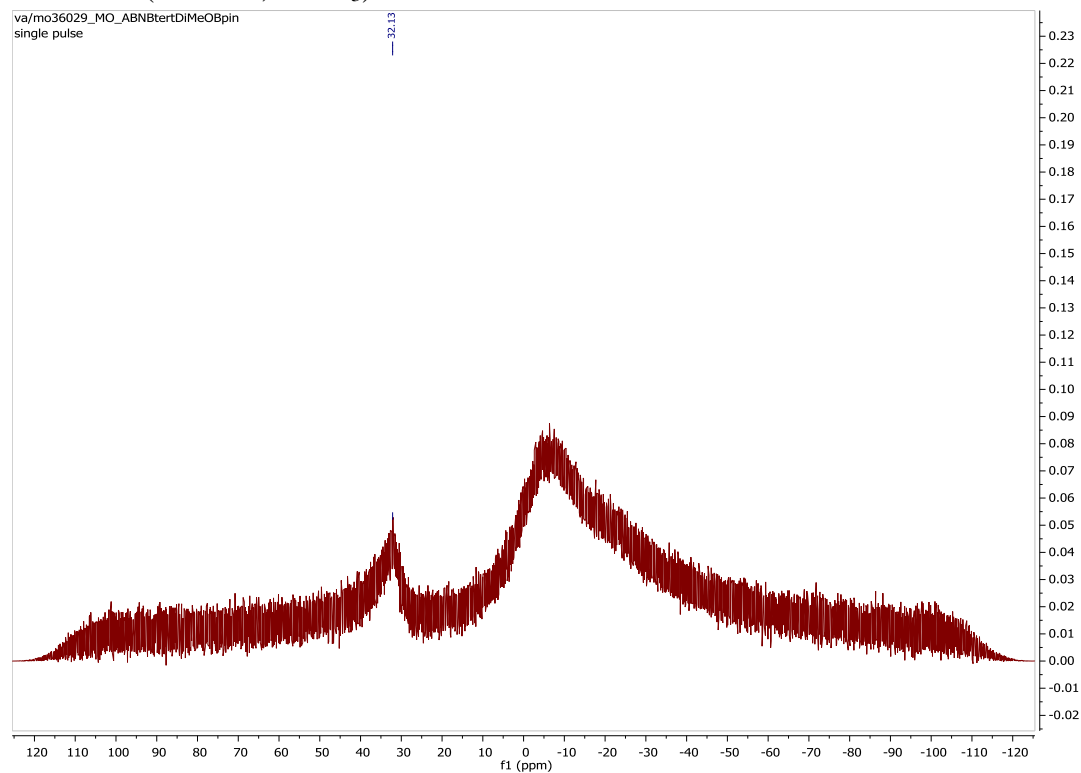

Chiral SFC traces: racemic

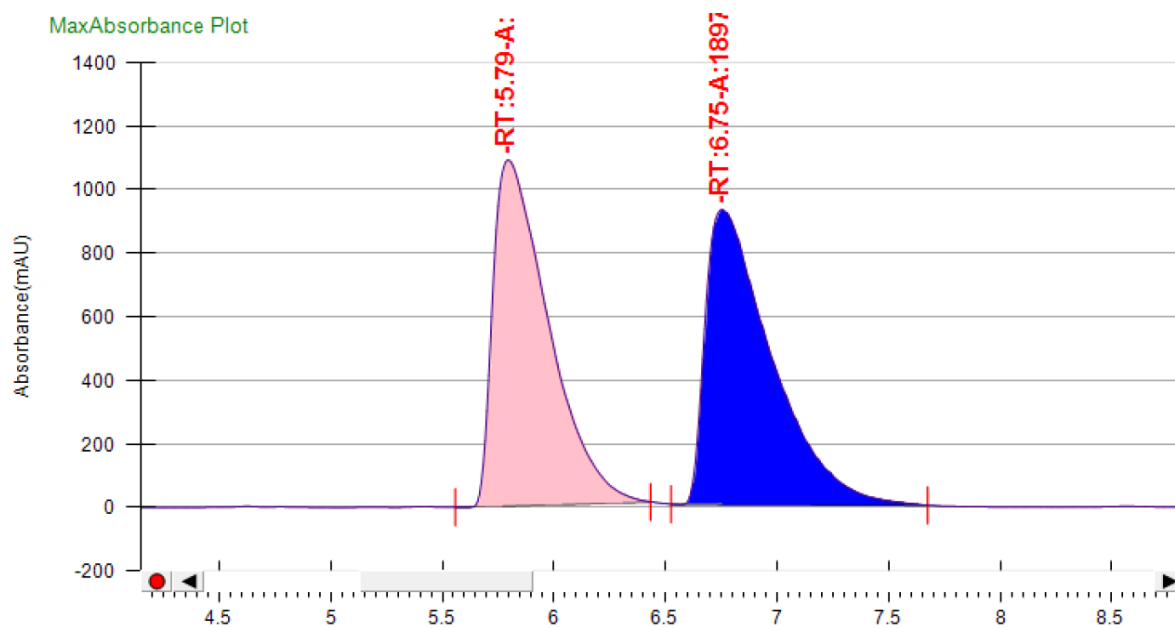

<sup>9</sup> The broad peak at  $-5$  ppm is due to the use of standard NMR tube (contains borosilicates).

## Chiral SFC traces: enantioenriched

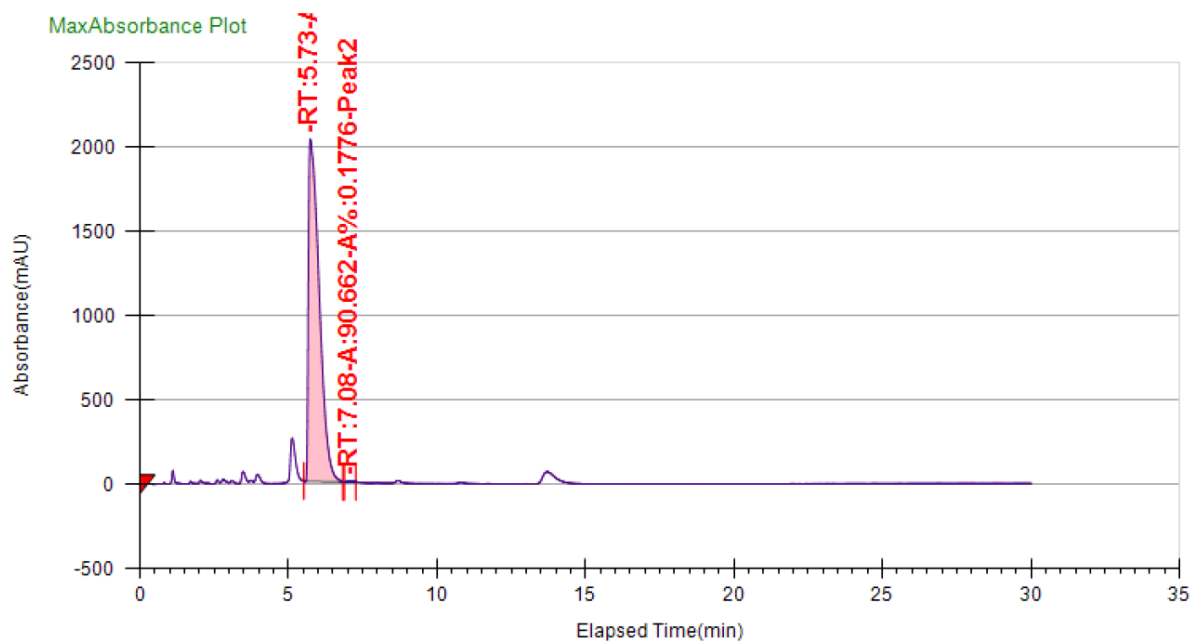

## Chiral SFC traces: racemic + enantioenriched

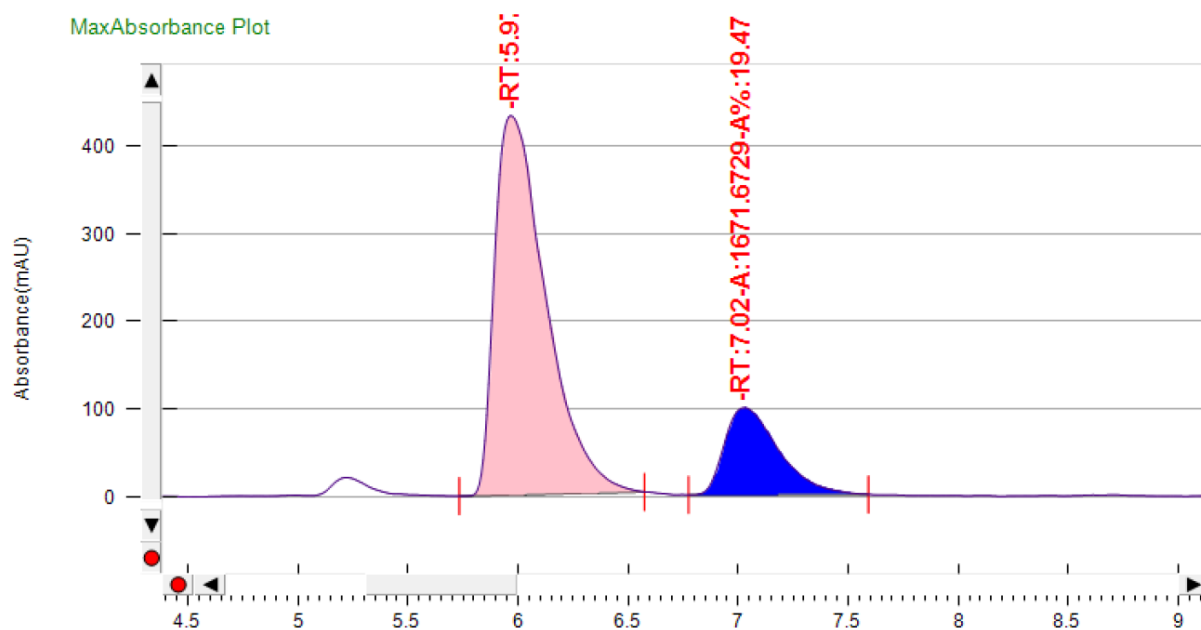



# 11ba-major

<sup>1</sup>H NMR (400 MHz, CDCl<sub>3</sub>)

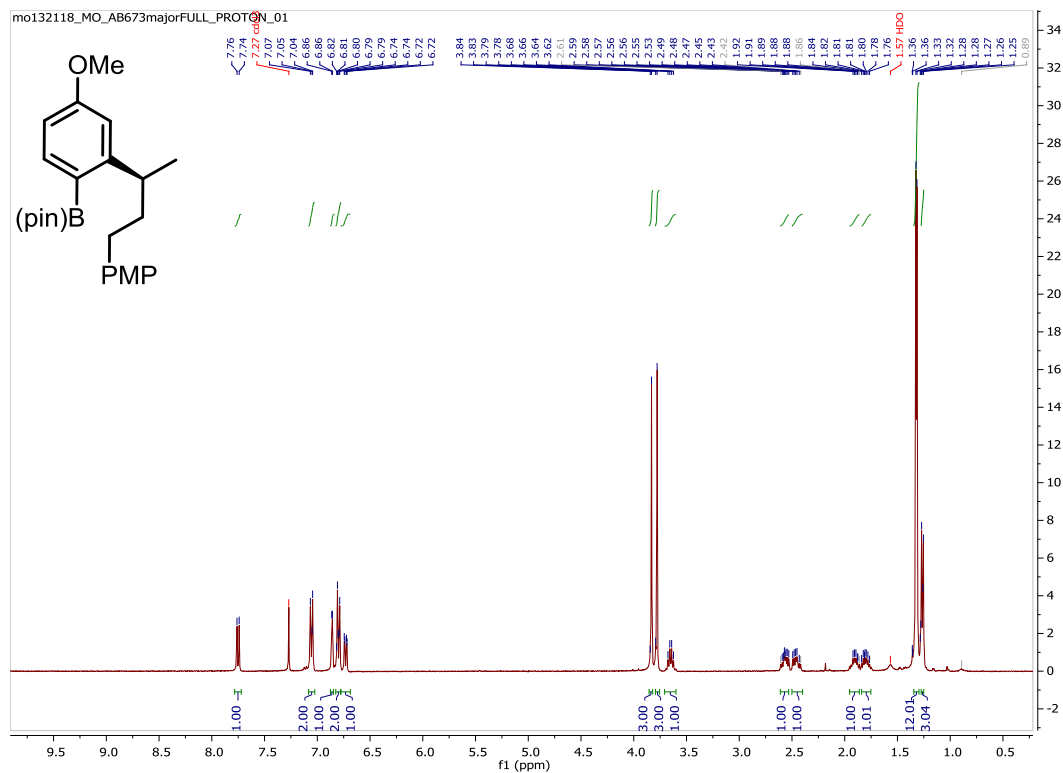

<sup>13</sup>C NMR (100 MHz, CDCl<sub>3</sub>)

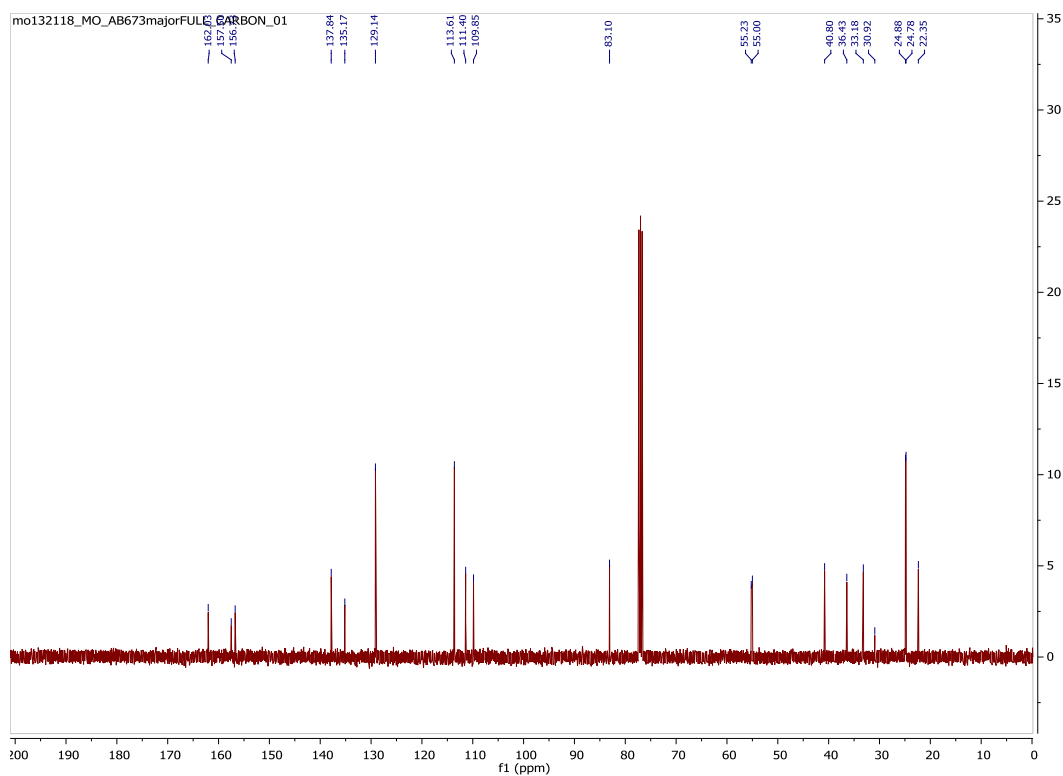

$^{11}\text{B}$  NMR (96 MHz,  $\text{CDCl}_3$ )<sup>10</sup>

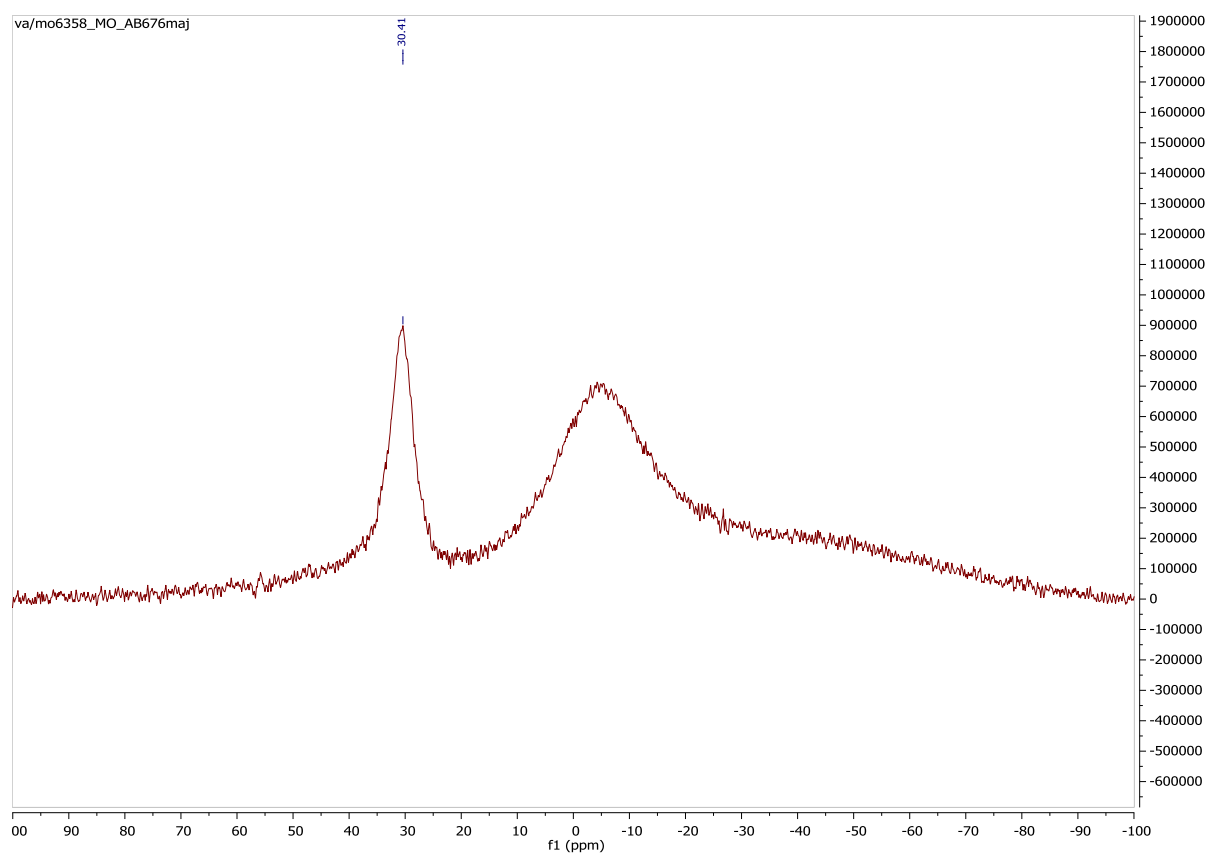

Chiral SFC traces: racemic

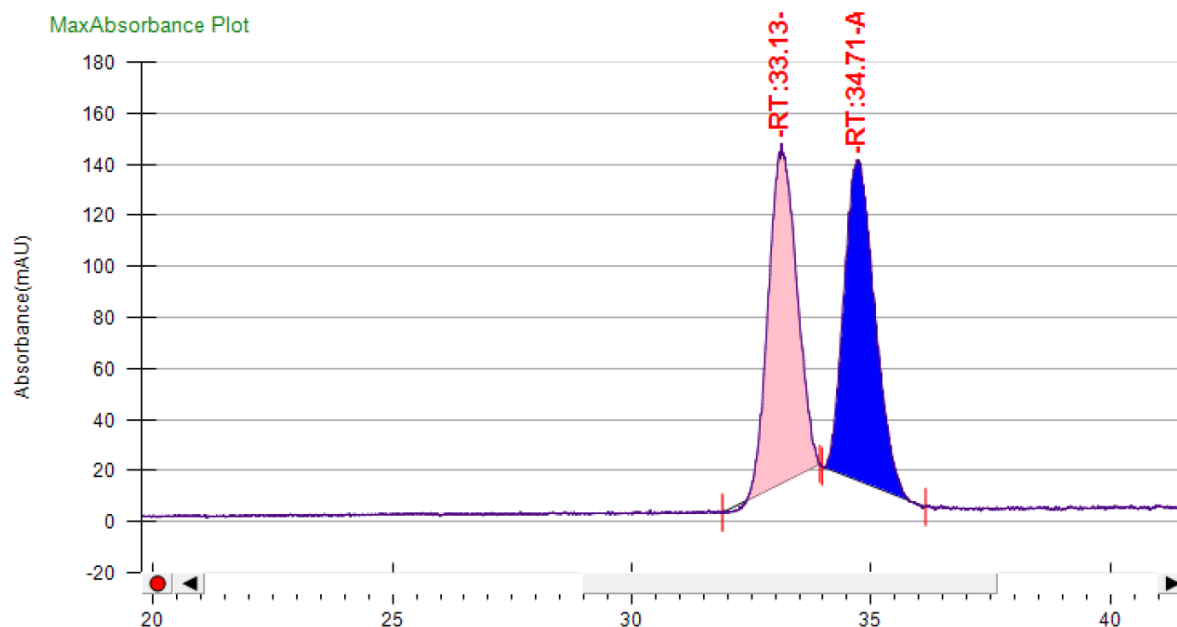

<sup>10</sup> The broad peak at  $-5$  ppm is due to the use of standard NMR tube (contains borosilicates).

# Chiral SFC traces: enantioenriched

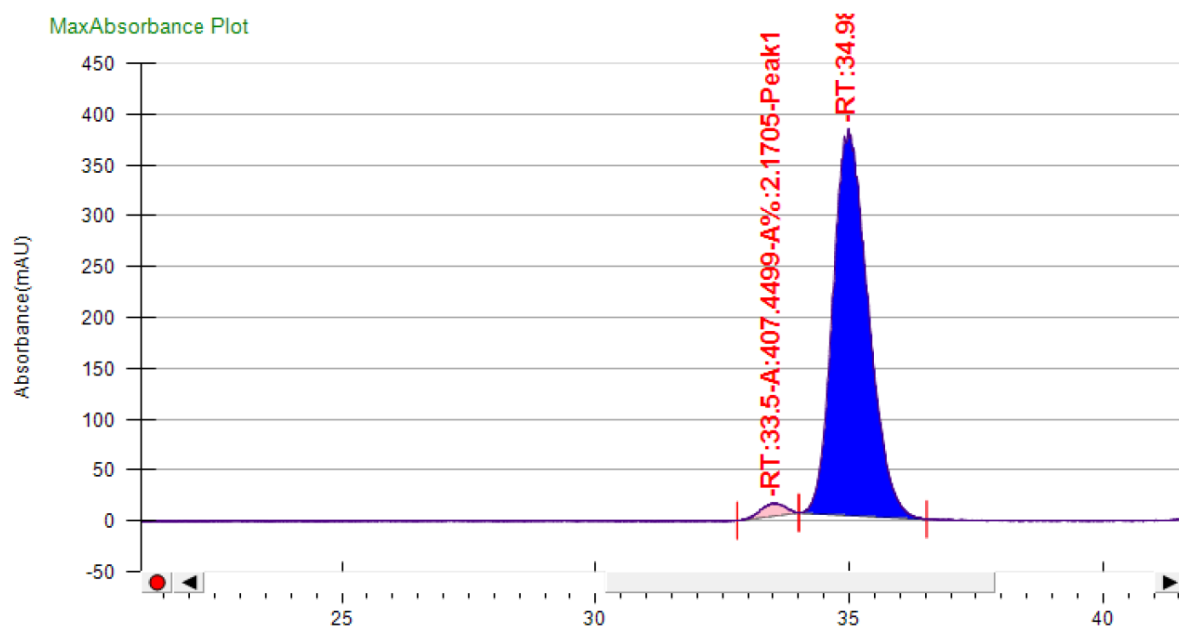

# 11ba-minor

<sup>1</sup>H NMR (400 MHz, CDCl<sub>3</sub>)

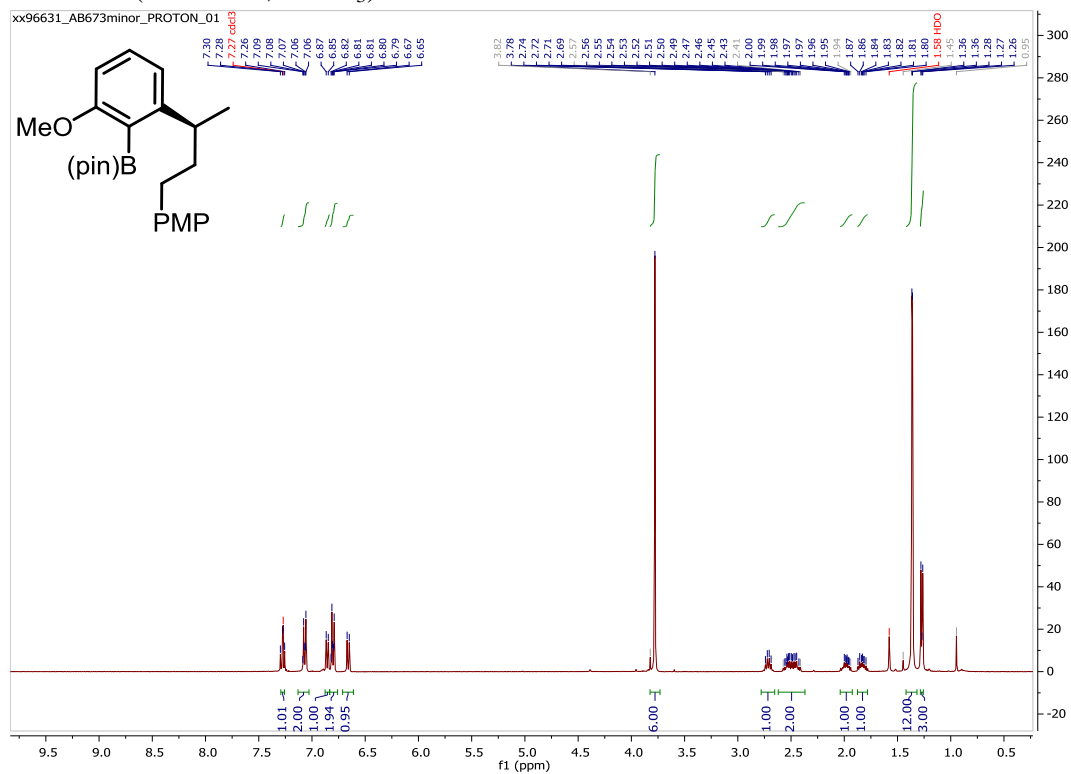

<sup>13</sup>C NMR (100 MHz, CDCl<sub>3</sub>)

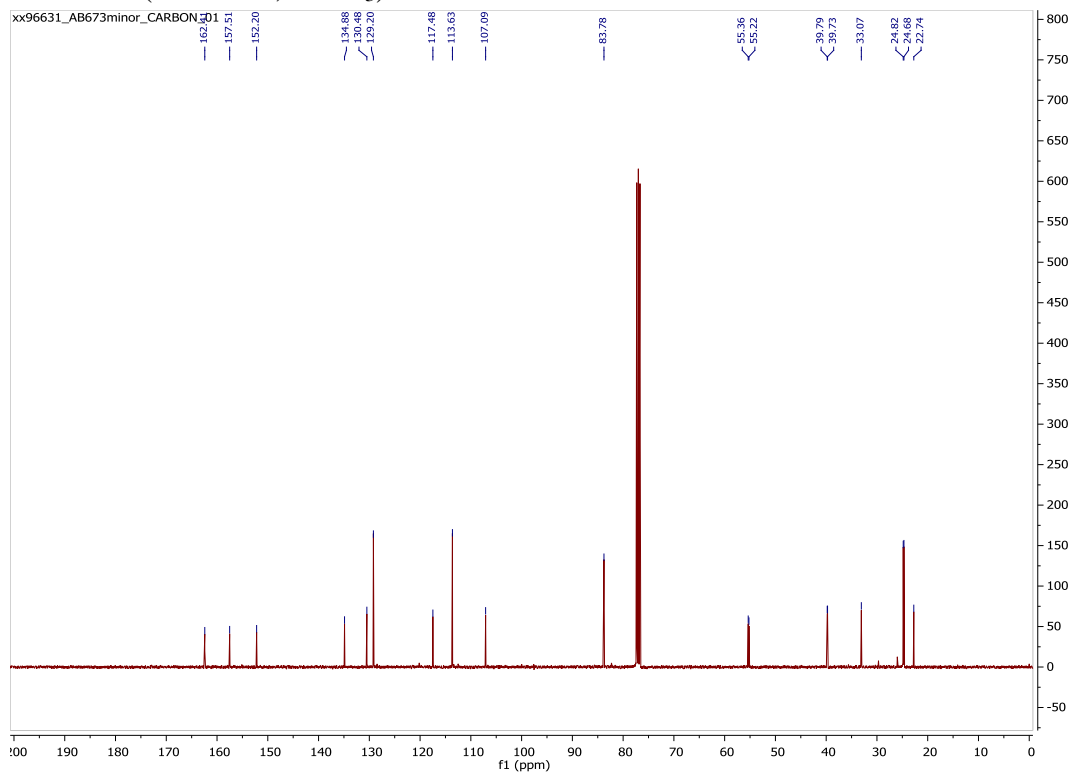

# $^{11}\text{B}$ NMR (96 MHz, NONE)<sup>11</sup>

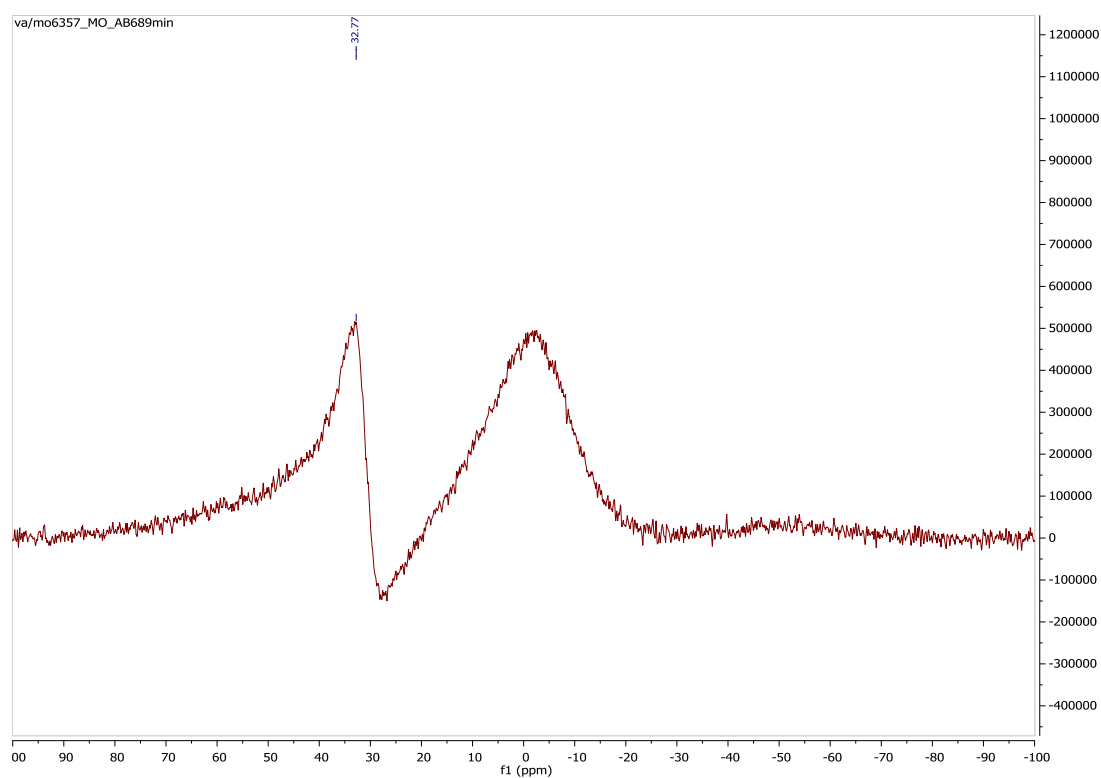

## Chiral SFC traces: racemic

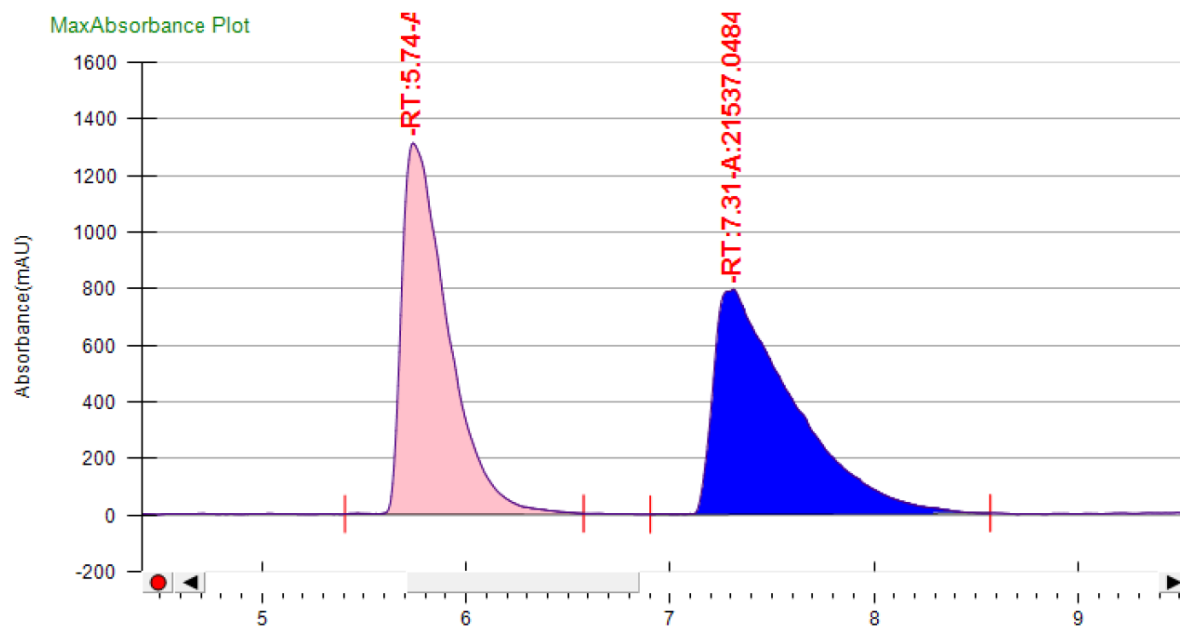

<sup>11</sup> The broad peak at  $-5$  ppm is due to the use of standard NMR tube (contains borosilicates).

# Chiral SFC traces: enantioenriched

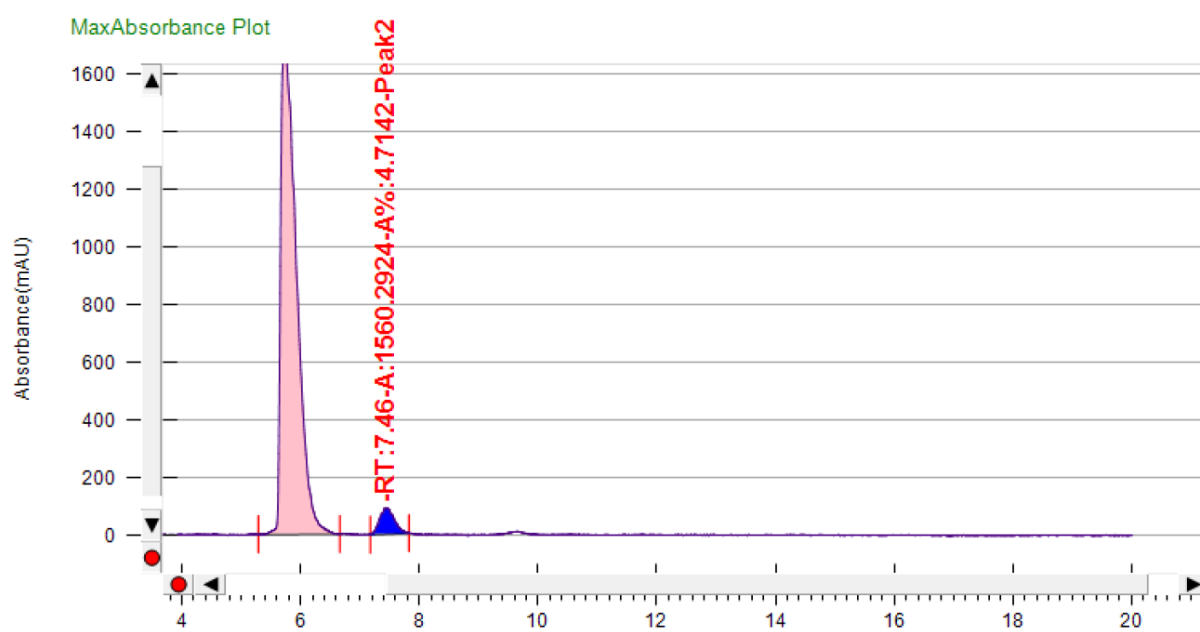

# 15ba

## <sup>1</sup>H NMR (500 MHz, DMSO)

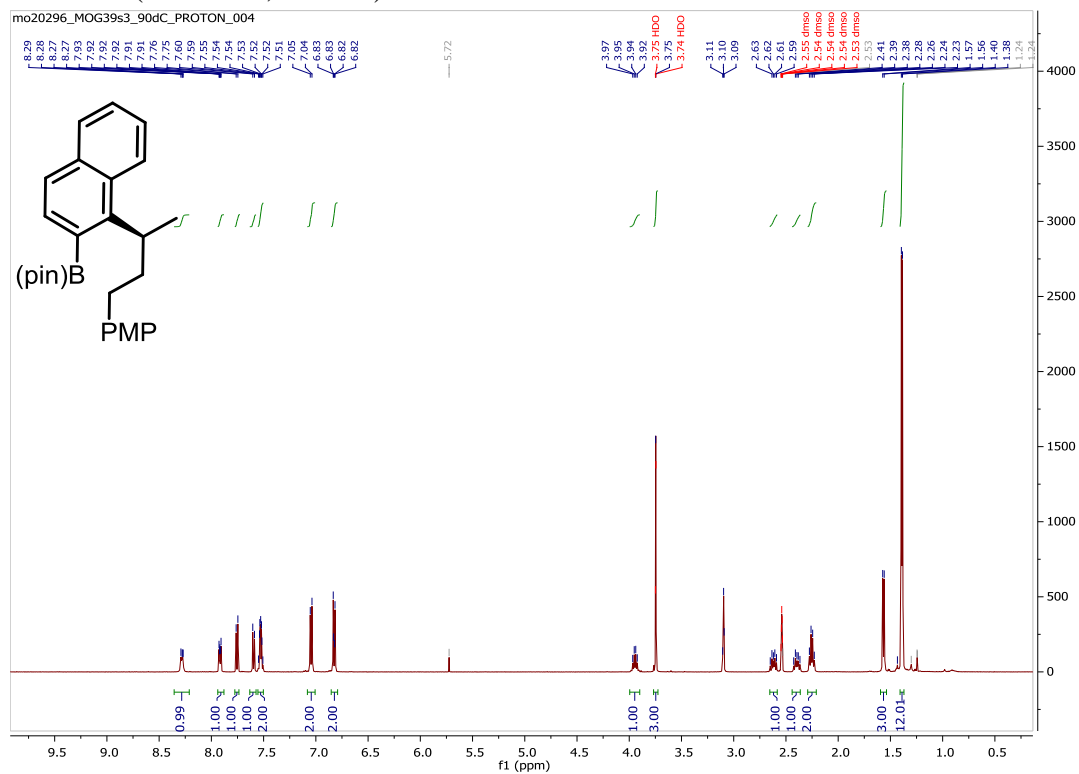

## <sup>13</sup>C NMR (125 MHz, DMSO)

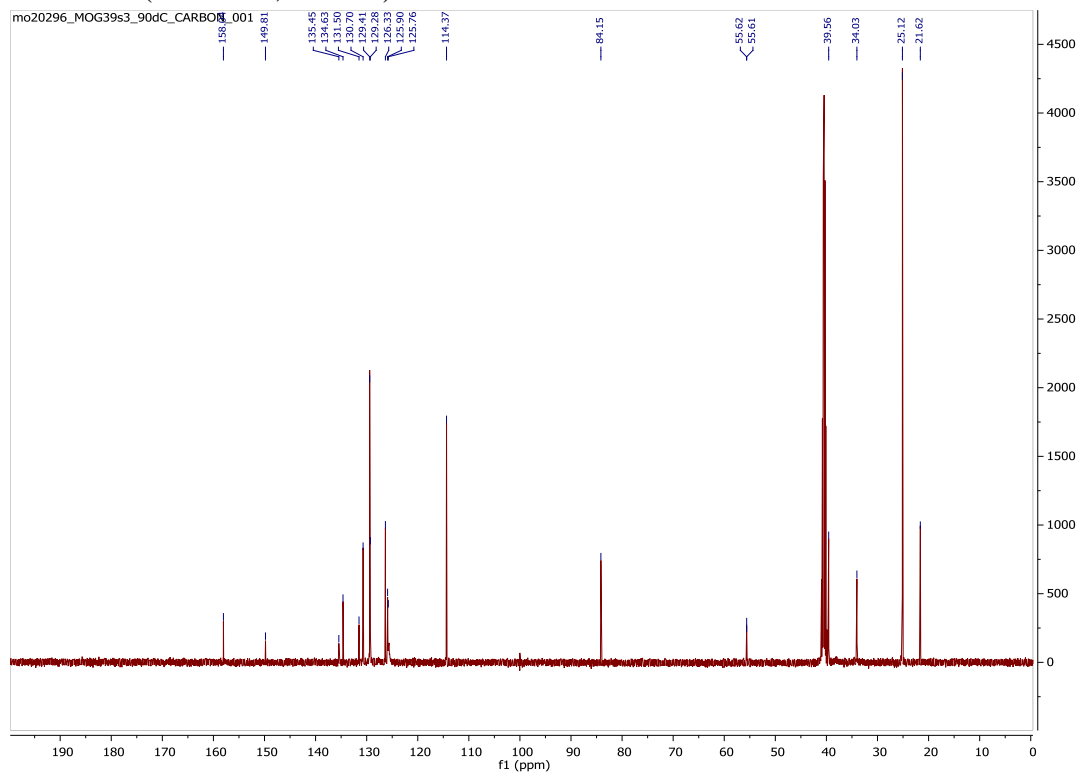

# $^{11}\text{B}$ NMR (96 MHz, NONE)<sup>12</sup>

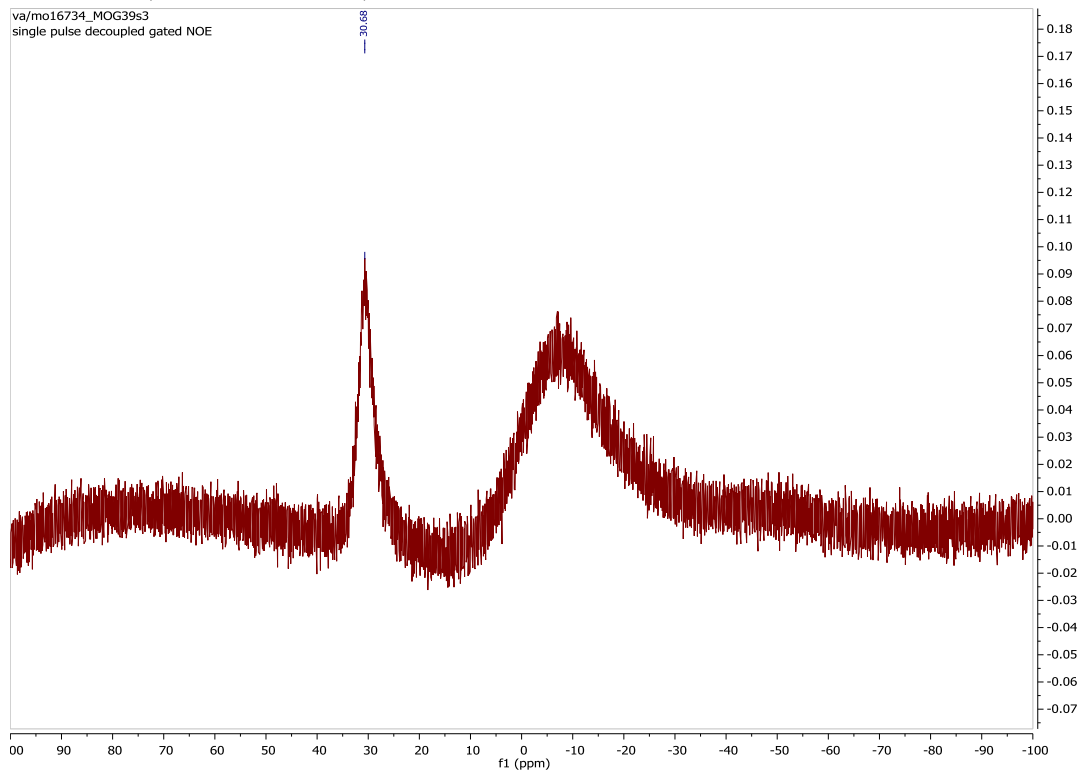

## Chiral SFC traces: racemic

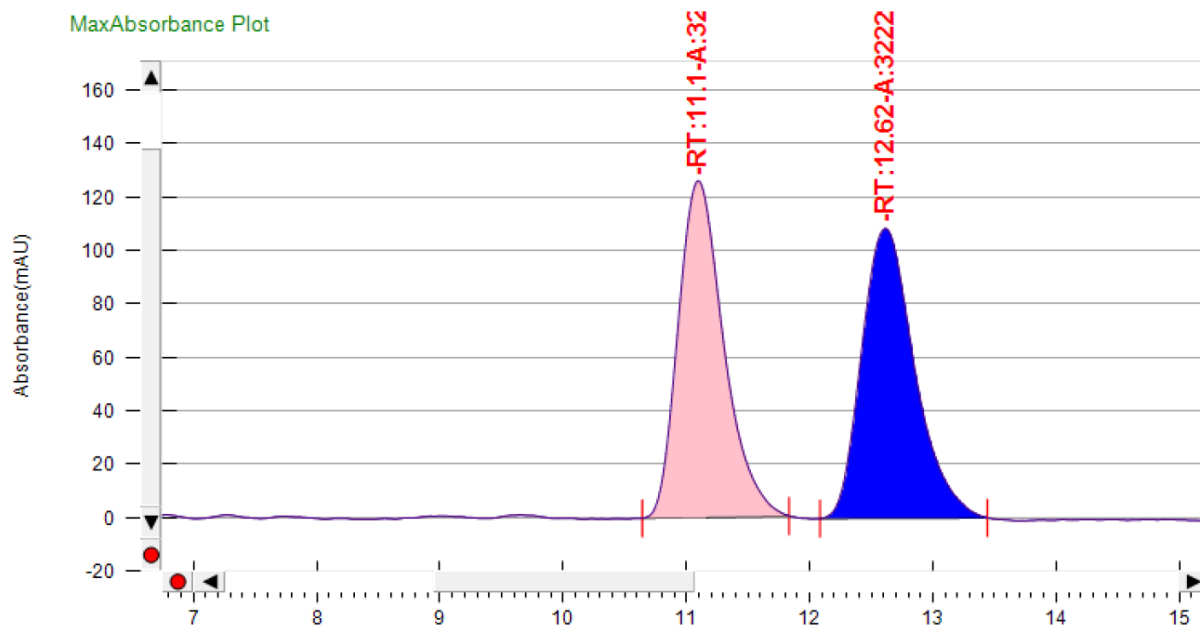

<sup>12</sup> The broad peak at  $-5$  ppm is due to the use of standard NMR tube (contains borosilicates).



# Chiral SFC traces: enantioenriched

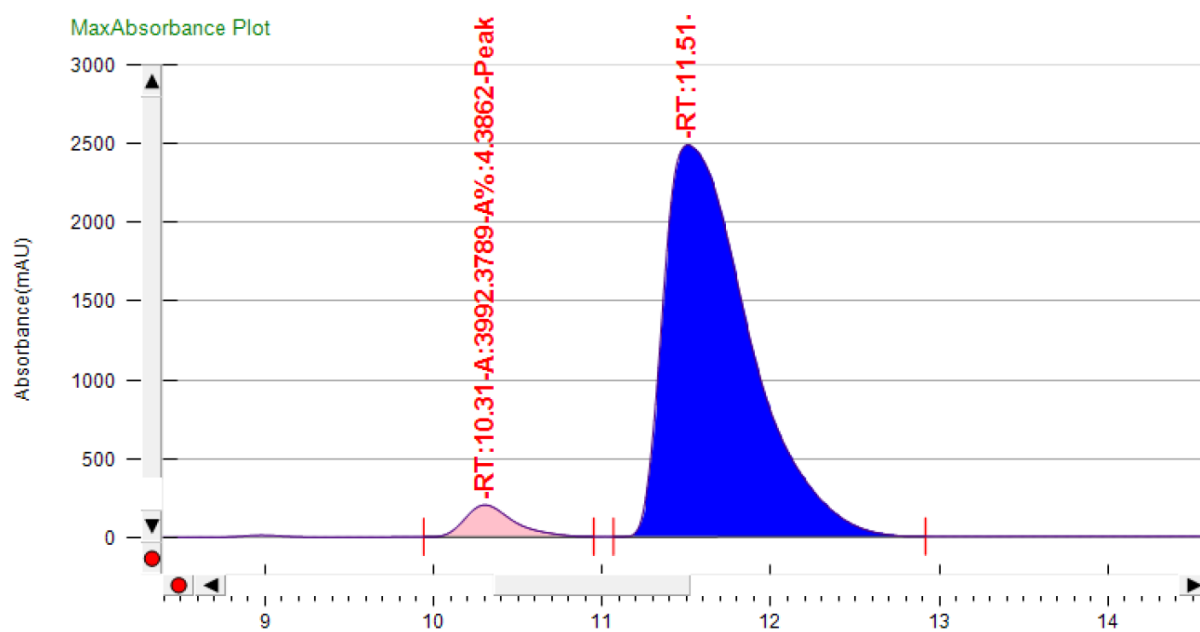

# 18aa

<sup>1</sup>H NMR (400 MHz, CDCl<sub>3</sub>)

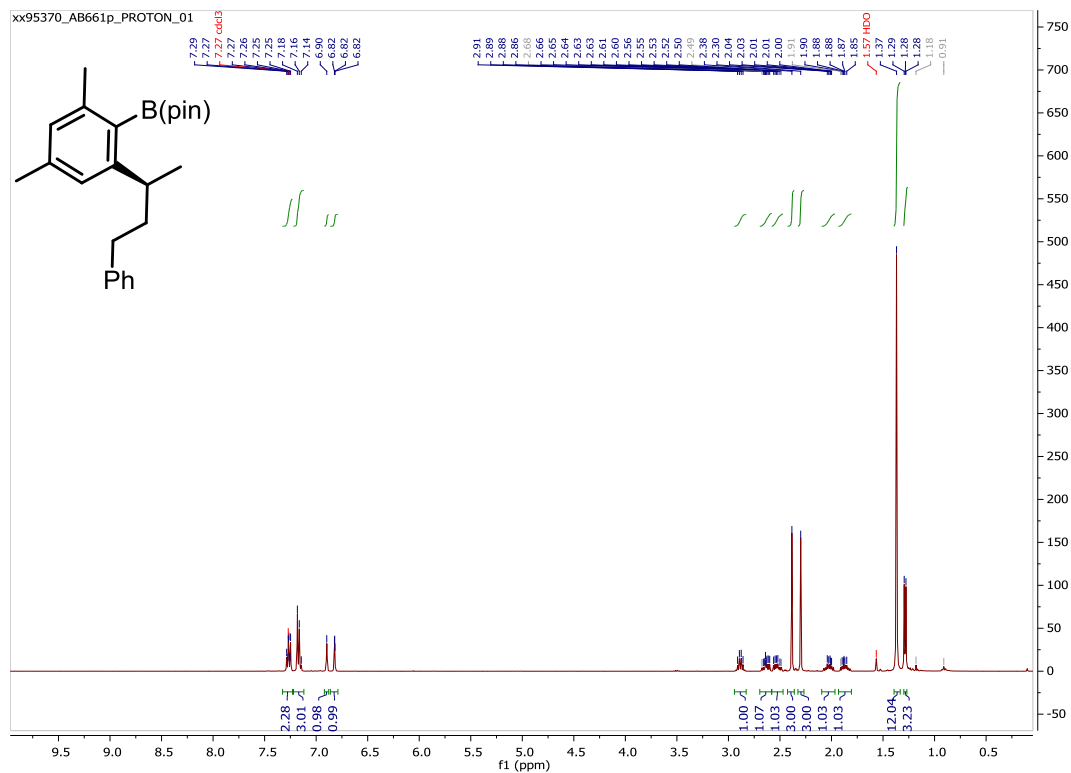

<sup>13</sup>C NMR (100 MHz, CDCl<sub>3</sub>)

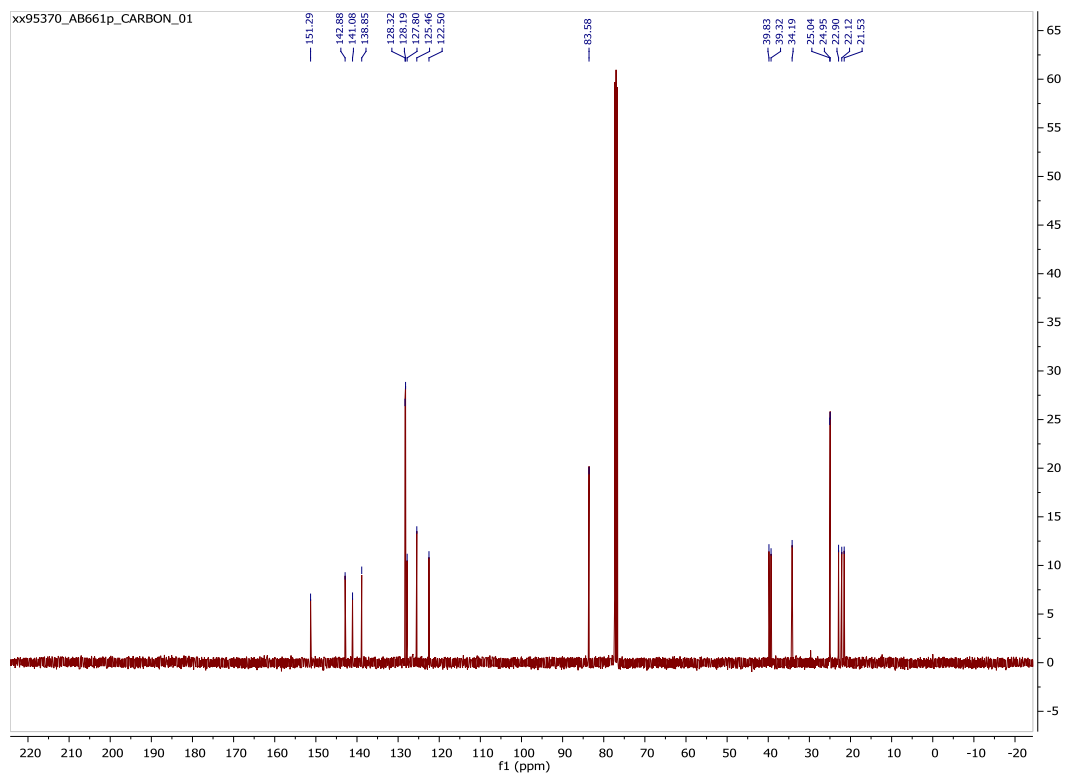

# $^{11}\text{B}$ NMR (96 MHz, NONE)<sup>13</sup>

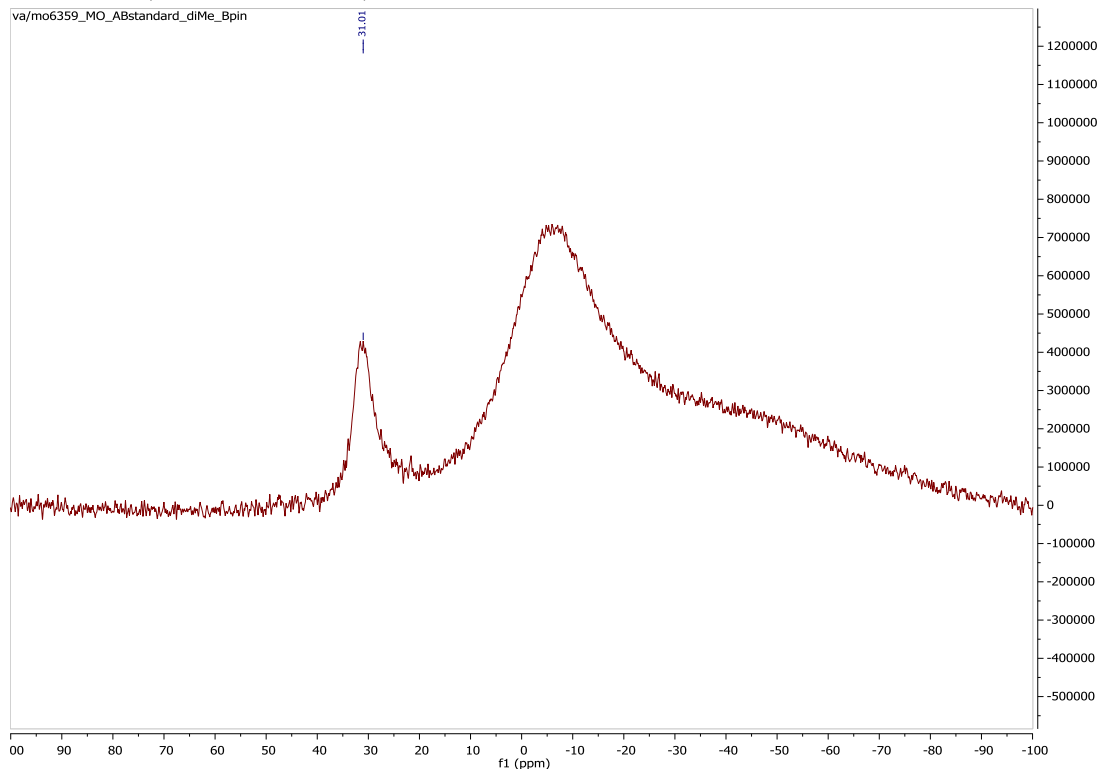

## Chiral SFC traces: racemic

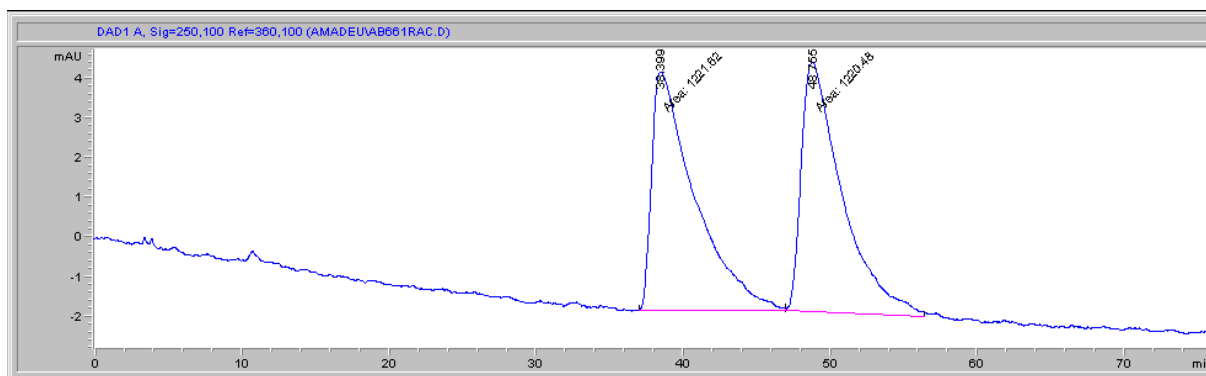

## Chiral HPLC traces: enantioenriched

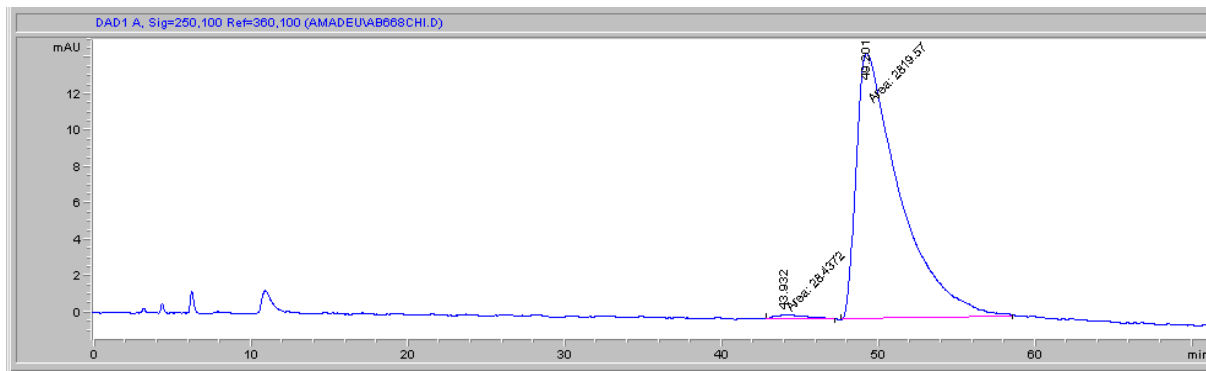

<sup>13</sup> The broad peak at -5 ppm is due to the use of standard NMR tube (contains borosilicates).

18ga

<sup>1</sup>H NMR (500 MHz, CDCl<sub>3</sub>)

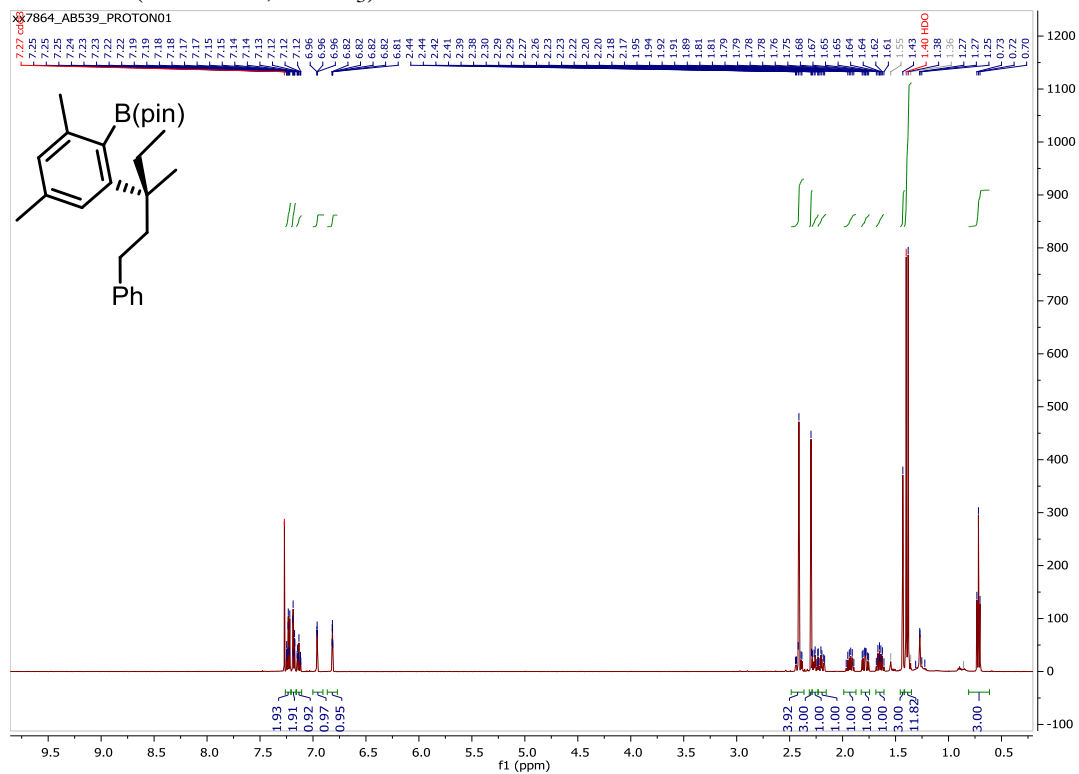

<sup>13</sup>C NMR (100 MHz, CDCl<sub>3</sub>)

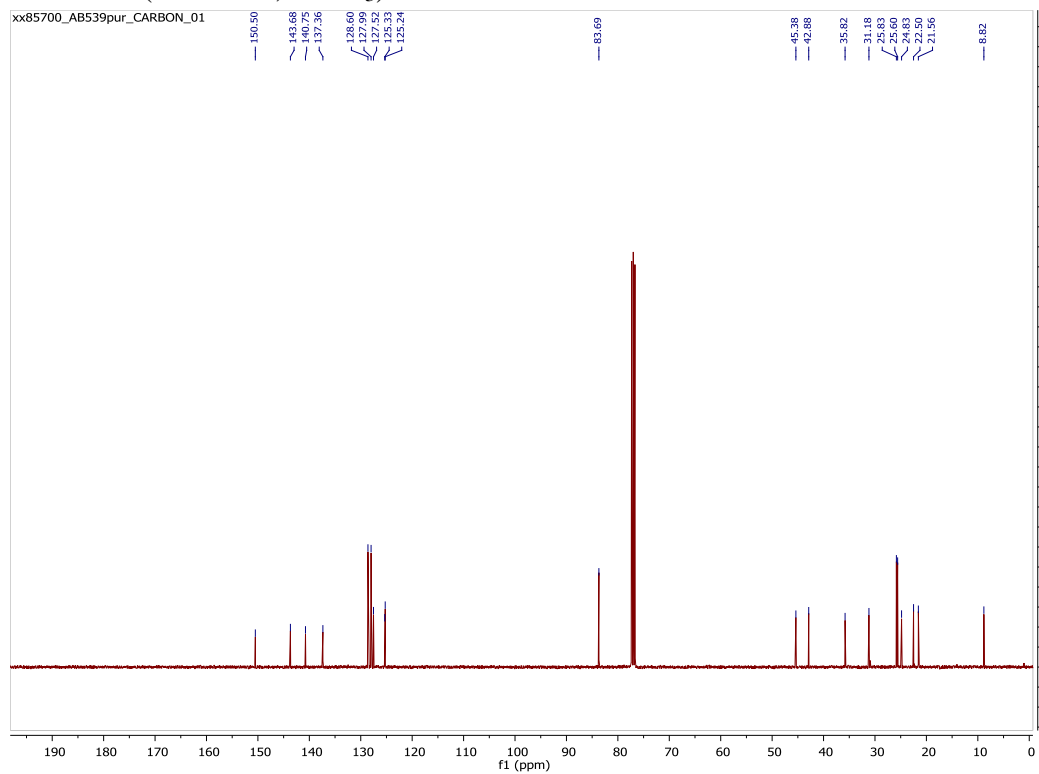

# $^{11}\text{B}$ NMR (96 MHz, $\text{CDCl}_3$ )<sup>14</sup>

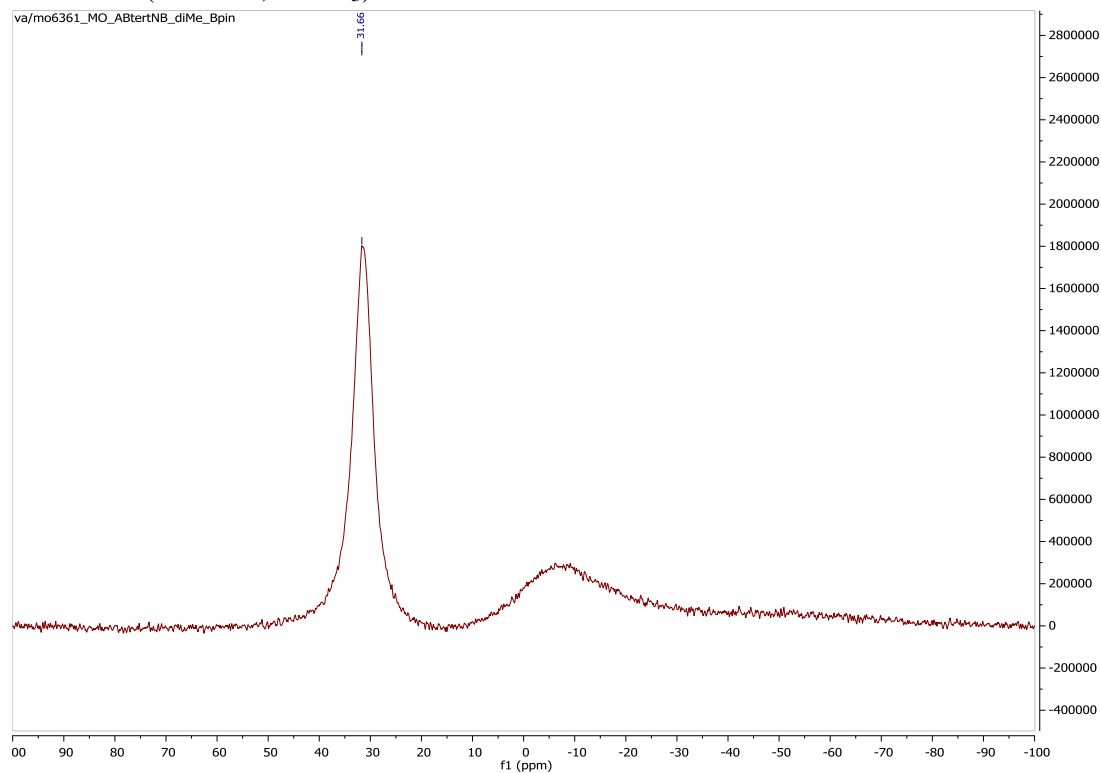

## Chiral SFC traces: racemic

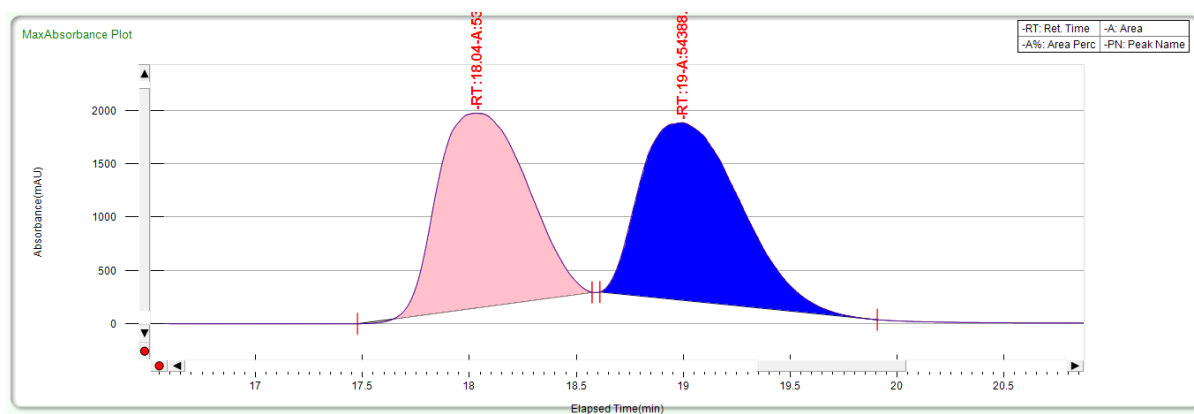

<sup>14</sup> The broad peak at -5 ppm is due to the use of standard NMR tube (contains borosilicates).

# Chiral HPLC traces: enantioenriched

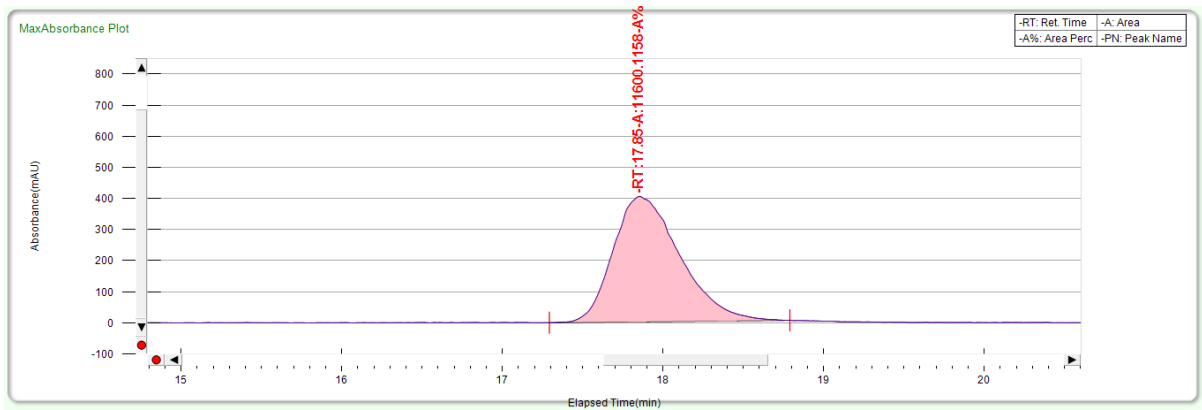

# 8ba

## <sup>1</sup>H NMR (400 MHz, CDCl<sub>3</sub>)

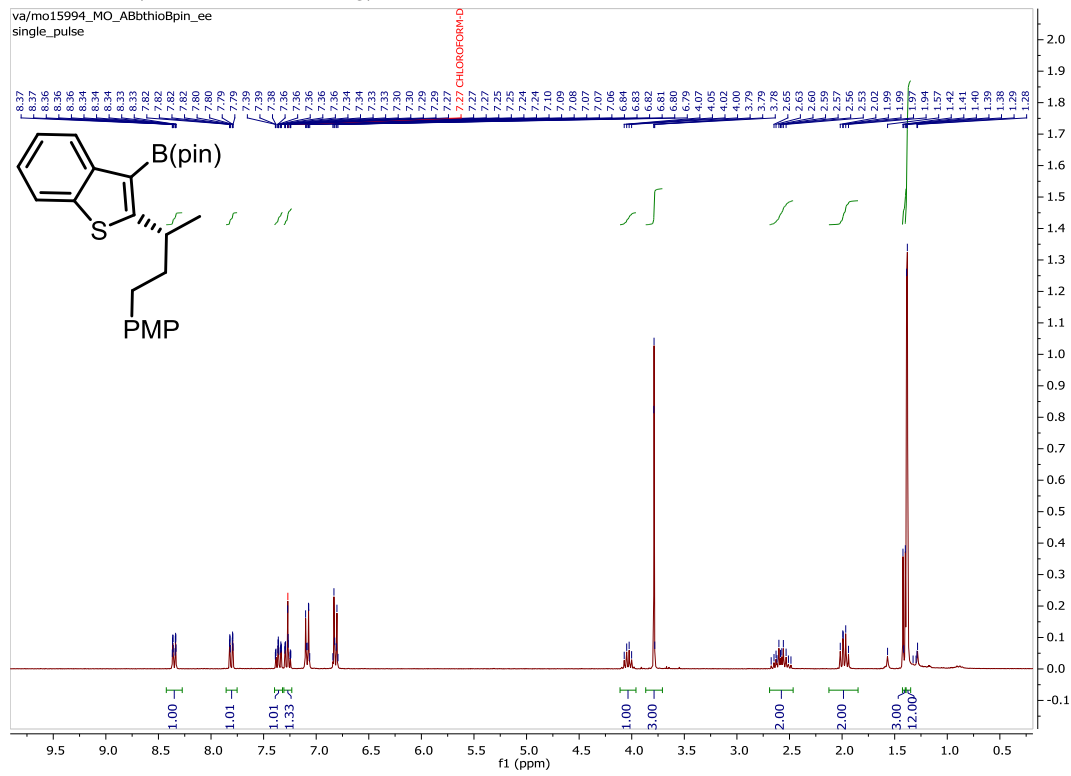

## <sup>13</sup>C NMR (100 MHz, CDCl<sub>3</sub>)

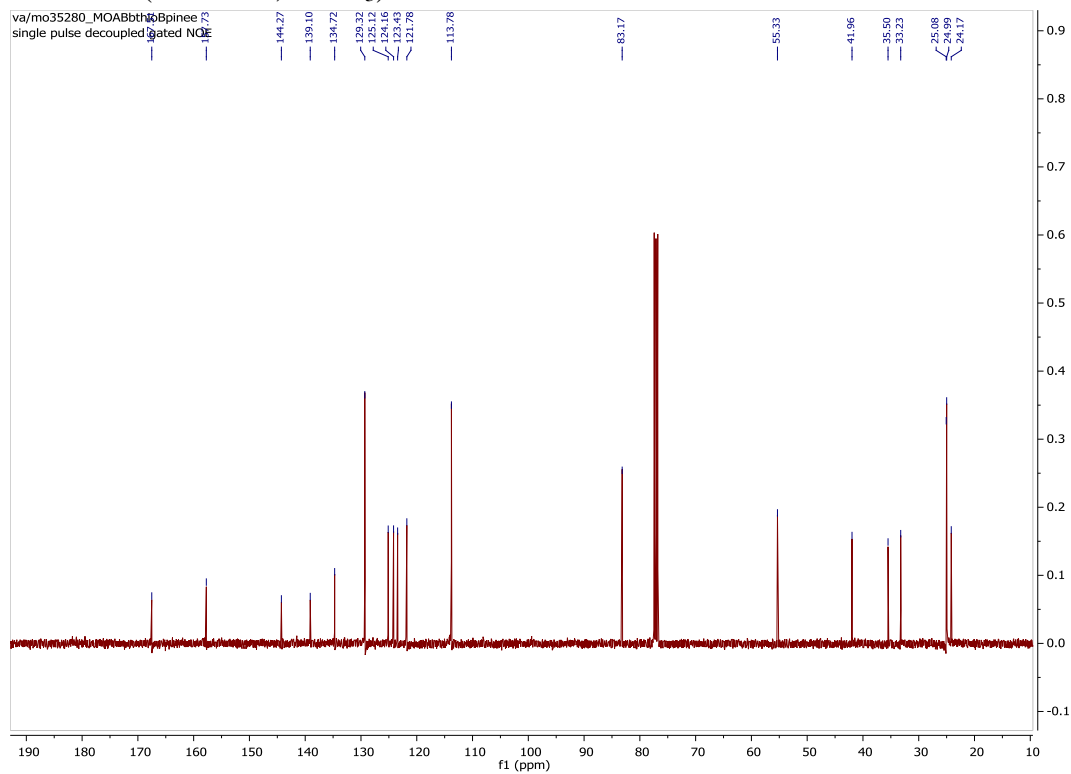

# $^{11}\text{B}$ NMR (96 MHz, $\text{CDCl}_3$ )<sup>15</sup>

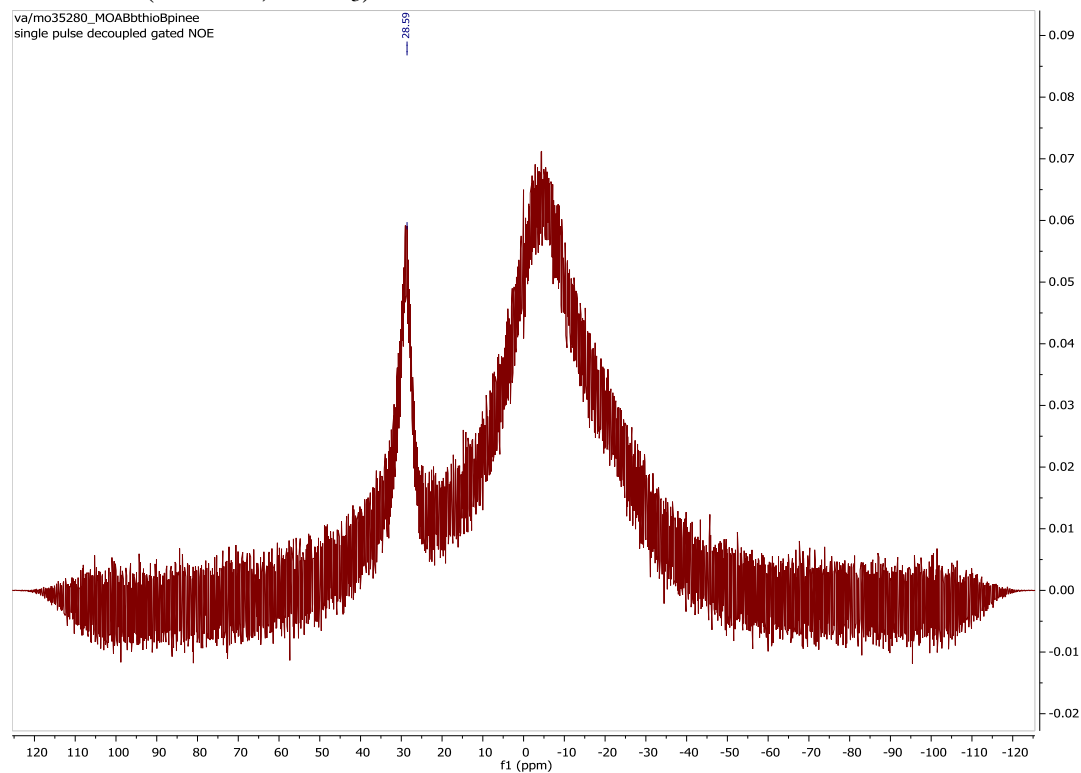

Chiral SFC traces: racemic

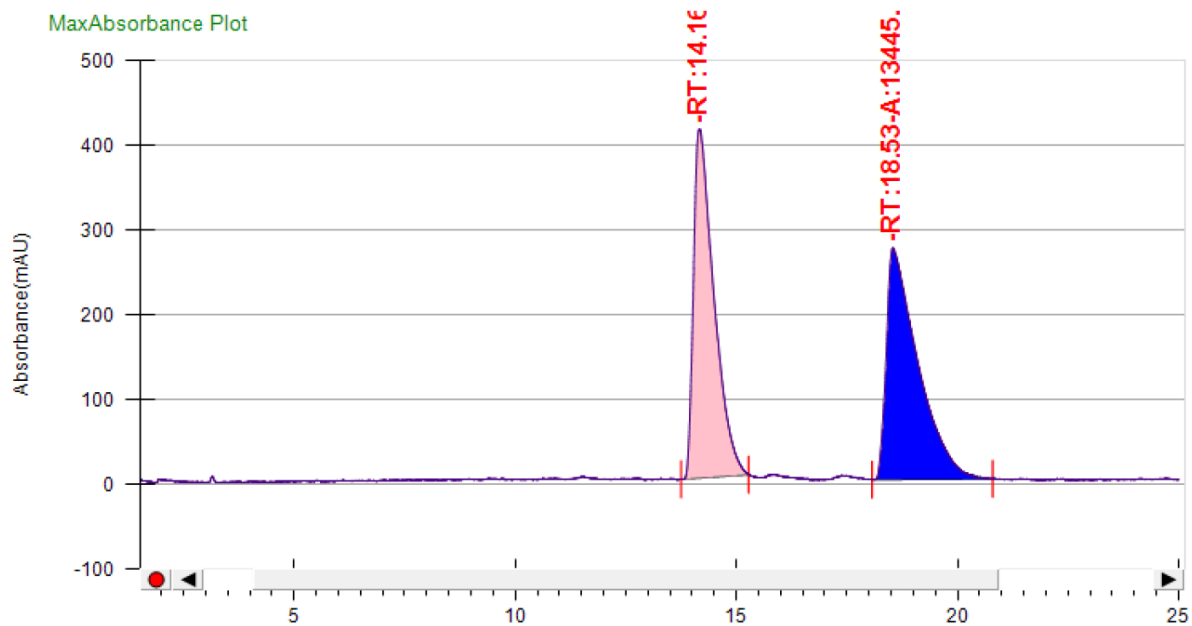

<sup>15</sup> The broad peak at  $-5$  ppm is due to the use of standard NMR tube (contains borosilicates).



# Chiral SFC traces: enantioenriched

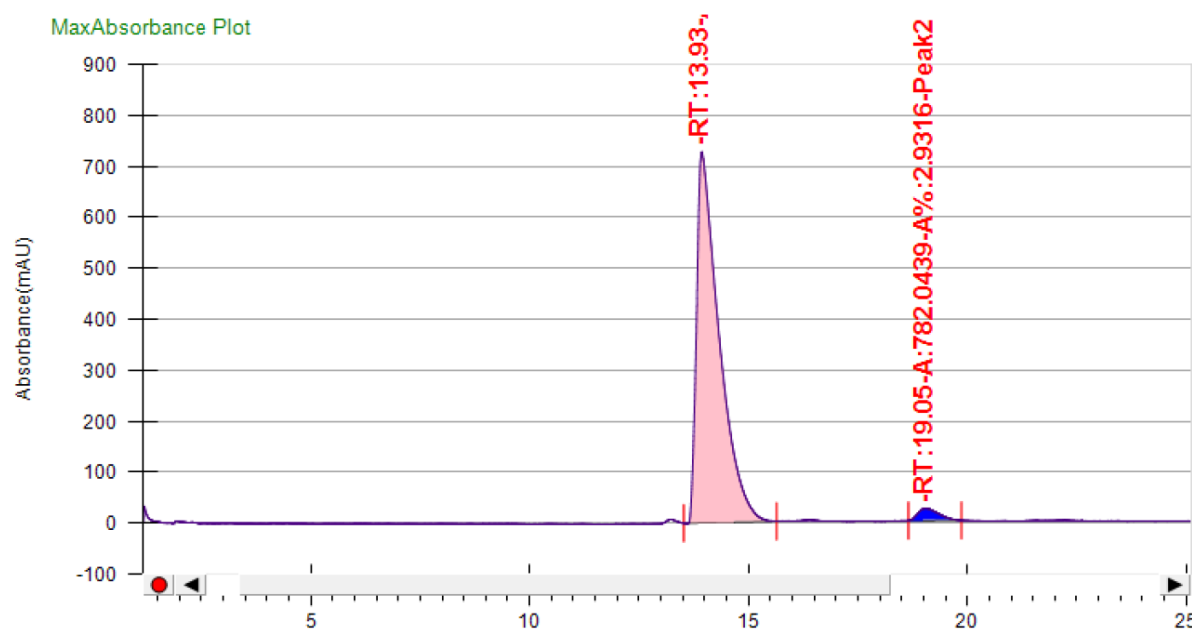

Supplement: ja6b03963_si_002.pdf [file ja6b03963_si_002.pdf]
