# Supplementary material
Source: PubMed Central journal article supplement (PMC5063455)
Supplement: ja6b03963_si_001.pdf [file ja6b03963_si_001.pdf]

# Development of Enantiospecific Coupling of Secondary and Tertiary Boronic Esters with Aromatic Compounds

Marcin Odachowski, Amadeu Bonet, Stephanie Essafi, Philip Conti-Ramsden, Jeremy N. Harvey, Daniele Leonori and Varinder K. Aggarwal

School of Chemistry, University of Bristol, Cantock's Close, Bristol BS8 1TS, UK

## Supporting Material I

Experimental procedures, React-IR experiments and plots, DFT calculations

### Contents

|                                                                                          |    |
|------------------------------------------------------------------------------------------|----|
| 1. General Information .....                                                             | 1  |
| 2. General Procedures.....                                                               | 3  |
| 3. Synthesis of the starting materials .....                                             | 5  |
| 4. Oxidant/Electrophile Screening.....                                                   | 16 |
| 5. Reaction Products – Coupling to heterocycles.....                                     | 17 |
| 6. Reaction Products – Coupling of secondary boronic esters to 6-membered aromatics..... | 33 |
| 7. Reaction Products – Coupling of tertiary boronic esters to 6-membered aromatics ..... | 51 |
| 8. Reaction products – B(pin) incorporation .....                                        | 65 |
| 9. React-IR studies .....                                                                | 73 |
| 10. DFT calculations .....                                                               | 77 |

### 1. General Information

All required fine chemicals were used directly without purification unless otherwise noted. All air- and water-sensitive reactions were carried out in flame-dried glassware under nitrogen atmosphere by using standard Schlenk manifold techniques.  $^1\text{H}$  and  $^{13}\text{C}$  nuclear magnetic resonance (NMR) spectra were acquired at various field strengths as indicated, and were referenced to  $\text{CHCl}_3$  (7.27 and 77.00 ppm for  $^1\text{H}$  and  $^{13}\text{C}$ , respectively) or DMSO (2.54 and 40.45 ppm for  $^1\text{H}$  and  $^{13}\text{C}$ , respectively).  $^1\text{H}$  NMR coupling constants are reported in Hertz. Data are reported as follows: chemical shift, multiplicity (s = singlet, br s = broad singlet, d = doublet, t = triplet, q = quartet, qi = quintet, sx = sextet, sp = septet, m = multiplet, dd = doublet of doublets) and integration.  $^{11}\text{B}$  NMR spectra were recorded with

complete proton decoupling by using  $\text{BF}_3 \cdot \text{Et}_2\text{O}$  (0.0 ppm) as an external standard. High resolution mass spectra were recorded using electronic ionization (EI), electron spray ionization (ESI) or chemical ionization (CI). For CI, methane or  $\text{NH}_4\text{OAc}/\text{MeOH}$  were used as reagent gases. All IR data was obtained on a Perkin-Elmer Spectrum One FT-IR spectrometer. Optical rotations were obtained on a Perkin-Elmer 241MC polarimeter. Analytical TLC: aluminium-backed plates precoated (0.25 mm) with Merck Silica Gel 60 F254. Compounds were visualized by exposure to UV light or by dipping the plates in permanganate ( $\text{KMnO}_4$ ) stain followed by heating. Flash column chromatography was performed using Merck Silica Gel 60 (40–63  $\mu\text{m}$ ). All mixed solvent eluents are reported as v/v solutions. Chiral HPLC was performed using Diacel Chiralpak IA, IB and IC columns (4.6  $\times$  250 mm  $\times$  5  $\mu\text{m}$ ) fitted with the respective guards (4  $\times$  10 mm) and monitored by DAD (diode array detector). Chiral GC was performed on an Agilent Technologies 6890N Network GC system by using a Supelco DM column (30 m  $\times$  2.5 mm). Solvents were purified by standard methods. TMEDA was distilled over  $\text{CaH}_2$ . (–)-Sparteine was obtained from the commercially available sulfate pentahydrate salt (99%, Acros) and isolated according to literature procedure.<sup>1</sup> The (–)-sparteine free base readily absorbs atmospheric carbon dioxide ( $\text{CO}_2$ ) and should be stored under argon/nitrogen at  $-20\text{ }^\circ\text{C}$  in a Schlenk flask. *sec*-BuLi (1.3 M sol. in cyclohexane/hexane (92/8)) was purchased from Acros. *n*-BuLi (1.6 M sol. in hexanes) and *t*-BuLi (1.7 M sol. in pentane) were purchased from Sigma-Aldrich. Abbreviations: PMP = *para*-methoxyphenyl; DDQ = 2,3-dichloro-4,5-dicyano-1,4-benzoquinone; NBS = *N*-bromosuccinimide; NIBS = *N*-iodosuccinimide; DBDMH = 1,3-dibromo-5,5-dimethylhydantoin.

---

<sup>1</sup> Nikolic, N. A.; Beak, P.; *Org. Synth.*, **1997**, 74, 23.

## 2. General Procedures

### Hydroborations with $\text{HBBr}_2 \cdot \text{SMe}_2$ and $\text{BBr}_3$ – General Procedure 1

A solution of the alkene (1.1 eq.) in  $\text{CH}_2\text{Cl}_2$  (0.5 M) was cooled to 0 °C and dibromoborane dimethylsulfide complex (1.0 eq., 1 M in  $\text{CH}_2\text{Cl}_2$ ) and boron tribromide (1.0 eq.) were added dropwise. The cooling bath was removed and the mixture was stirred for 2 h at room temperature.  $^{11}\text{B}$  NMR spectroscopy revealed the complete formation of the hydroborated product [ $^{11}\text{B}$  NMR (96 MHz,  $\text{CH}_2\text{Cl}_2$ )  $\delta_{\text{B}} \sim 63$  ppm]. In a second flask, pinacol (3.0 eq.) was dissolved in  $\text{CH}_2\text{Cl}_2$  (0.5 M),  $\text{Et}_3\text{N}$  (8.0 eq.) was added and the resulting solution was cooled to 0 °C. The crude hydroborated product was slowly added dropwise. The mixture was allowed to warm to room temperature and stirred for 2 h.  $^{11}\text{B}$  NMR spectroscopy revealed complete formation of the pinacol boronic ester [ $^{11}\text{B}$  NMR (96 MHz,  $\text{CH}_2\text{Cl}_2$ )  $\delta_{\text{B}} \sim 32$  ppm]. The mixture was diluted with  $\text{CH}_2\text{Cl}_2$  (50 mL) and washed with water (50 mL). The aqueous layer was extracted with  $\text{CH}_2\text{Cl}_2$  (3 x 50 mL). The combined organic layers were concentrated under vacuum. The crude material was dissolved in MeOH and water was added until the mixture turned turbid. The solvents were evaporated to dryness under vacuum. The cycle of dissolution/concentration was repeated (x 6) until TLC analysis showed almost complete removal of pinacol. The crude product was dissolved in  $\text{CH}_2\text{Cl}_2$ , dried over  $\text{MgSO}_4$ , filtered and concentrated. Purification by column chromatography on silica gel, gave the desired boronic ester.

### $\text{C}(\text{sp}^3)\text{-C}(\text{sp}^2)$ coupling of boronic esters with furan by using NBS – General Procedure 2

A solution of furan (1.2 eq.) in THF (0.3 M) was cooled to  $-78$  °C and treated with *n*-BuLi (1.2 eq., 1.6 M in hexanes). The cooling bath was removed and the mixture was stirred at room temperature for 1 h. The mixture was cooled to  $-78$  °C and the boronic ester (1.0 eq.) was added dropwise as a solution in THF (0.5 M). The mixture was stirred at  $-78$  °C for 1 h at which point  $^{11}\text{B}$  NMR spectroscopy showed complete formation of the ‘ate’ complex [ $^{11}\text{B}$  NMR (96 MHz, THF)  $\delta_{\text{B}} \sim 8$  ppm]. A solution of *N*-bromosuccinimide (NBS, 1.2 eq.) in THF (0.3 M) was added dropwise. After 1 h at  $-78$  °C, a saturated aqueous solution of  $\text{Na}_2\text{S}_2\text{O}_3$  was added and the reaction mixture was allowed to warm to room temperature. The reaction mixture was diluted with  $\text{Et}_2\text{O}$  and water. The layers were separated and the aqueous layer was extracted with  $\text{Et}_2\text{O}$ . The combined organic layers were dried over  $\text{MgSO}_4$ , filtered and concentrated under vacuum. Purification by column chromatography on silica gel, gave

the desired product. *NOTE: NBS must be dissolved and added to the 'ate' complex solution before it turns orange. This applies particularly to examples where NBS (or other electrophile) is added in MeOH.*

### **C(sp<sup>3</sup>)-C(sp<sup>2</sup>) coupling of boronic esters with furan by using DDQ—General Procedure 3**

A solution of furan (1.2 eq.) in THF (0.3 M) was cooled to  $-78\text{ }^{\circ}\text{C}$  and treated with *n*-BuLi (1.2 eq., 1.6 M in hexanes). The cooling bath was removed and the mixture was stirred at room temperature for 1 h. The mixture was cooled to  $-78\text{ }^{\circ}\text{C}$  and the boronic ester (1.0 eq.) was added dropwise as a solution in THF (0.5 M). The mixture was stirred at  $-78\text{ }^{\circ}\text{C}$  for 1 h at which point <sup>11</sup>B NMR spectroscopy showed complete formation of the 'ate' complex [<sup>11</sup>B NMR (96 MHz, THF)  $\delta_{\text{B}} \sim 8\text{ ppm}$ ]. A solution of DDQ (1.5 eq.) in THF (0.3 M) was added dropwise. After 1 h at  $-78\text{ }^{\circ}\text{C}$ , a saturated aqueous solution of Na<sub>2</sub>S<sub>2</sub>O<sub>3</sub> was added and the reaction mixture was allowed to warm to room temperature. The reaction mixture was diluted with Et<sub>2</sub>O and water. The layers were separated and the aqueous layer was extracted with Et<sub>2</sub>O. The combined organic layers were dried over MgSO<sub>4</sub>, filtered and concentrated under vacuum. Purification by column chromatography on silica gel, gave the desired product. *NOTE: NBS must be dissolved and added to the 'ate' complex solution before it turns orange. This applies particularly to examples where NBS (or other electrophile) is added in MeOH.*

### 3. Synthesis of the starting materials

#### (*R*)-4,4,5,5-Tetramethyl-2-(4-phenylbutan-2-yl)-1,3,2-dioxaborolane [(*R*)-1a]

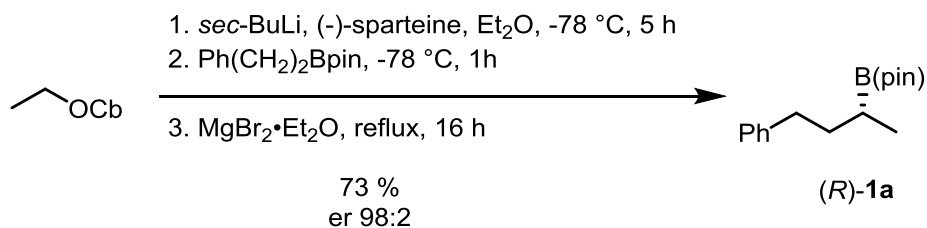

Prepared according to a literature known procedure.<sup>2</sup>

#### (*S*)-2-(4-(4-methoxyphenyl)butan-2-yl)-4,4,5,5-tetramethyl-1,3,2-dioxaborolane [(*S*)-1b]

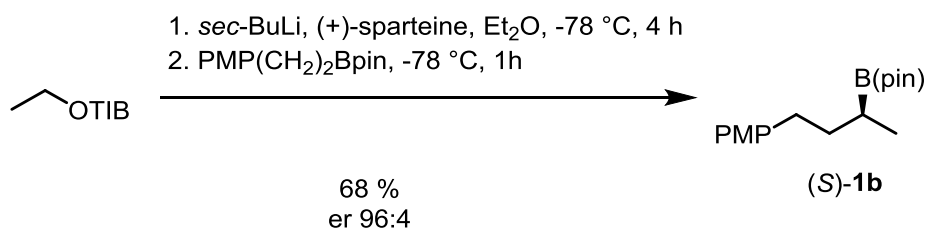

Prepared according to a literature known procedure.<sup>3</sup>

#### (*S*)-4,4,5,5-Tetramethyl-2-(4-methyl-1-phenylpentan-3-yl)-1,3,2-dioxaborolane [(*S*)-1c]

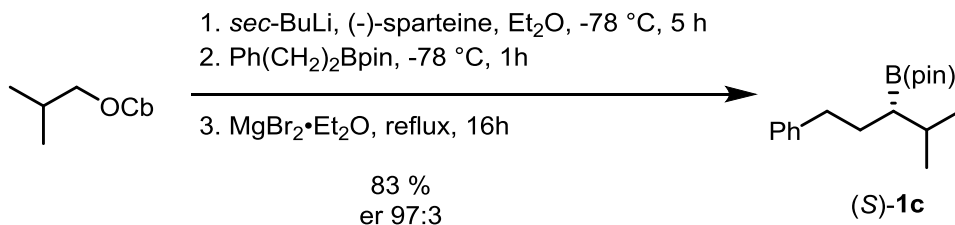

Prepared using the same procedure as reported for [(*R*)-1a]. Data in accordance with the literature.<sup>4</sup>

<sup>2</sup> Hesse, M. J.; Butts, C. P.; Willis, C. L.; Aggarwal, V. K.; *Angew. Chem. Int. Ed.*, **2012**, *51*, 12444.

<sup>3</sup> Larouche-Gauthier, R.; Elford, T. G.; Aggarwal, V. K.; *J. Am. Chem. Soc.*, **2011**, *133*, 16794.

<sup>4</sup> Bagutski, V.; Ros, A.; Aggarwal, V. K.; *Tetrahedron*, **2009**, *65*, 9956.

**(R)-2-(1-(4-methoxyphenyl)-7-methyloct-6-en-3-yl)-4,4,5,5-tetramethyl-1,3,2-dioxaborolane [(R)-1d]**

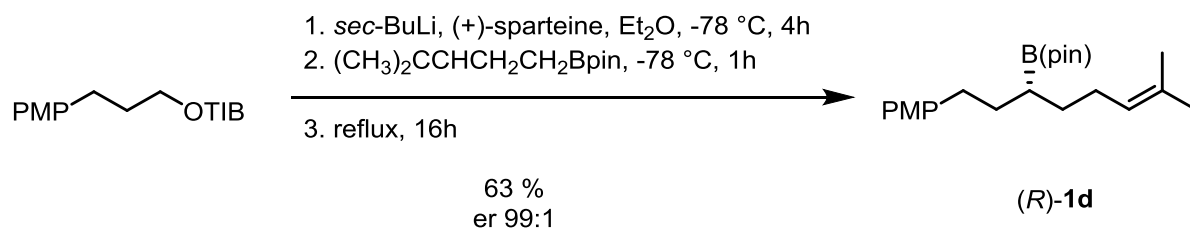

A solution of the (3-(4-methoxyphenyl)propyl 2,4,6-triisopropylbenzoate (345 mg, 0.87 mmol, 1.0 eq.) and (+)-sparteine (245mg, 1.04 mmol, 1.2 eq.) in Et<sub>2</sub>O (4.5 ml) was cooled to -78 °C. The solution was treated with *sec*-BuLi (0.82 mL, 1.042 mmol, 1.15 eq., 1.4 M in cyclohexane). The mixture was stirred for 4h at -78 °C and then a solution of 2-(3-methylbut-2-en-1-yl)-B(pin) (219 mg, 1.04 mmol, 1.2 eq.) in Et<sub>2</sub>O (5.0 mL) was added dropwise. The reaction mixture was stirred at -78 °C for 1 h and at refluxing conditions for 16h. Water (10 mL) was added and the layers were separated. The aqueous layer was extracted with Et<sub>2</sub>O (3 x 10 ml). The combined organic layers were washed with brine (30 ml), dried over MgSO<sub>4</sub> and concentrated under vacuum. The crude material was purified by column chromatography on silica gel, eluting with petrol:Et<sub>2</sub>O (99:1) to give (R)-1d (196 mg, 63%), which was obtained as an oil; er (*R*:*S*) 96:4; *R*<sub>f</sub> 0.51 (pentane:Et<sub>2</sub>O 95:5); [ $\alpha$ ]<sub>D</sub><sup>24</sup> -2 (*c* 1.0, CHCl<sub>3</sub>); IR (film):  $\nu$  (cm<sup>-1</sup>) 2977, 2923, 2855, 1511, 1379, 1314, 1244, 1143; <sup>1</sup>H NMR (400 MHz, CDCl<sub>3</sub>)  $\delta$  ppm 7.14–7.09 (m, 2H), 6.86–6.80 (m, 2H), 5.14 (br t, *J* = 7.1 Hz, 1H), 3.79 (s, 3H), 2.64–2.49 (m, 2H), 2.09–1.91 (m, 2H), 1.80–1.60 (m, 2H), 1.71 (s, 3H), 1.61 (s, 3H), 1.52 (m, 1H), 1.42 (m, 1H), 1.28 (s, 12H), 1.08 (m, 1H); <sup>13</sup>C NMR (100 MHz, CDCl<sub>3</sub>)  $\delta$  ppm 157.6, 135.2, 131.1, 129.2, 124.9, 113.6, 82.9, 55.2, 34.6, 33.6, 31.4, 27.7, 25.7, 24.8, 17.6; <sup>11</sup>B NMR (96 MHz, NONE)  $\delta$  ppm 34.1; HRMS (ESI) calcd. for C<sub>22</sub>H<sub>35</sub>BNaO<sub>3</sub> [*M*+Na]<sup>+</sup> 381.2571, found 381.2586.

**1d** was converted into the corresponding alcohol through oxidation to achieve resolution of the enantiomers in chiral HPLC analysis (see below):

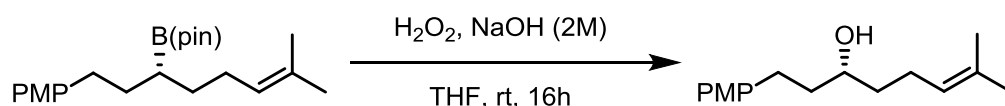

Boronic ester **1d** was treated with a solution of 2 N NaOH/30% H<sub>2</sub>O<sub>2</sub> (2:1 v/v) in THF/Et<sub>2</sub>O (1:1 v/v) to give, after purification by column chromatography (SiO<sub>2</sub>, 85:15 petrol/EtOAc), the desired secondary alcohol (20 mg, 95%) as an oil. *R*<sub>f</sub> 0.42 (petrol: Et<sub>2</sub>O 85:15); [ $\alpha$ ]<sub>D</sub><sup>24</sup> -20 (*c* 0.6, CHCl<sub>3</sub>); IR (film):  $\nu$  (cm<sup>-1</sup>) 3371, 2924, 2855, 1612, 1511, 1243, 1037, 820; <sup>1</sup>H

NMR (400 MHz, CDCl<sub>3</sub>)  $\delta$  ppm 7.16–7.10 (m, 2H), 6.87–6.81 (m, 2H), 5.14 (br t,  $J = 7.1$  Hz, 1H), 3.80 (s, 3H), 3.64 (m, 1H), 2.75 (m, 1H), 2.63 (m, 1H), 2.20–2.00 (m, 2H), 1.82–1.71 (m, 2H), 1.70 (s, 3H), 1.63 (s, 3H), 1.52–1.45 (m, 3H); <sup>13</sup>C NMR (100 MHz, CDCl<sub>3</sub>)  $\delta$  ppm 157.8, 134.2, 132.2, 129.3, 124.0, 113.8, 71.2, 55.2, 39.4, 37.4, 31.1, 25.7, 24.4, 17.7; HRMS (ESI) calcd. for C<sub>16</sub>H<sub>24</sub>NaO<sub>2</sub> [ $M+Na$ ]<sup>+</sup> 271.1669, found 271.1668.

Resolution of the enantiomers of the alcohol was achieved by using a chiral SFC system fitted with a Chiracel IB column as the stationary phase with CO<sub>2</sub>:[*n*-hexane:*i*-PrOH (9:1 v:v)] as the mobile phase at a flow rate of 4.0 mL min<sup>-1</sup> ( $P = 125$  bar). Injection volume: 20  $\mu$ L of a 2 g L<sup>-1</sup> solution of the compound in the eluent. Under these conditions, the faster running component (*R*) and the slower running component (*S*) eluted at 11.5 and 13.4 min., respectively, with a total analysis time of 18 min.

**(*R*)-*tert*-Butyl 6-Phenyl-4-(4,4,5,5-tetramethyl-1,3,2-dioxaborolan-2-yl)hexanoate [(*R*)-1e]**

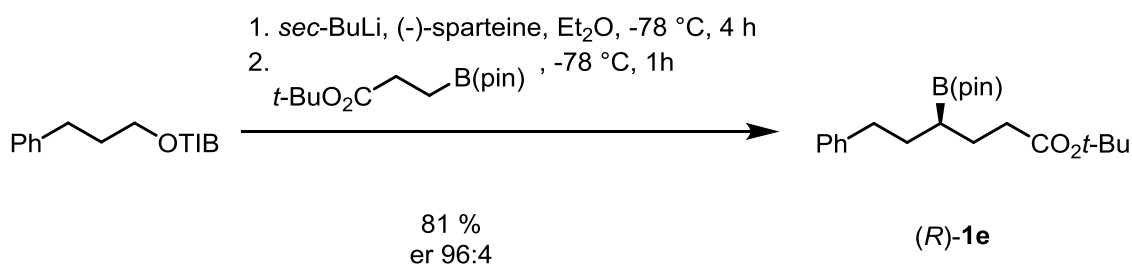

Prepared according to a literature known procedure.<sup>3</sup>

**(*R*)-2-(7-azido-1-(4-methoxyphenyl)heptan-3-yl)-4,4,5,5-tetramethyl-1,3,2-dioxaborolane [(*R*)-1f]**

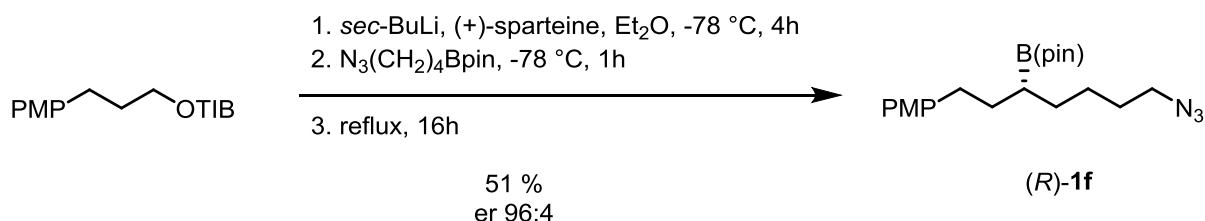

Prepared according to a literature known procedure.<sup>3</sup>

**(S)-4,4,5,5-Tetramethyl-2-(3-methyl-1-phenylpentan-3-yl)-1,3,2-dioxaborolane [(S)-1g]**

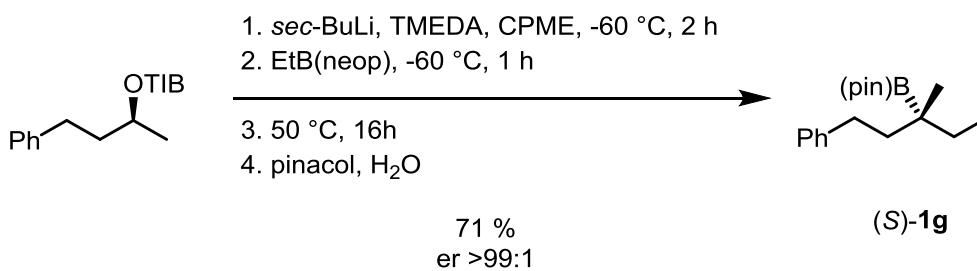

Prepared according to a literature known procedure.<sup>5</sup>

**(R)-4,4,5,5-Tetramethyl-2-(2-phenylbutan-2-yl)-1,3,2-dioxaborolane [(R)-1h]**

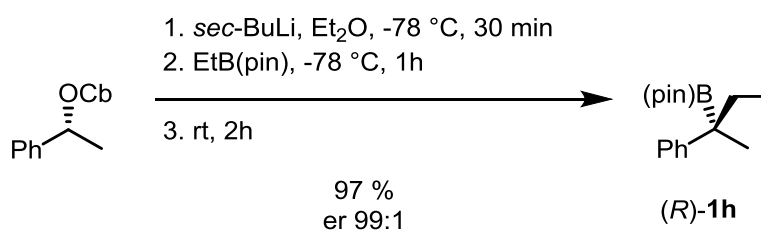

Prepared according to a literature known procedure.<sup>6</sup>

**(R)-4,4,5,5-Tetramethyl-2-(4-methyl-2-phenylpentan-2-yl)-1,3,2-dioxaborolane [(R)-1i]**

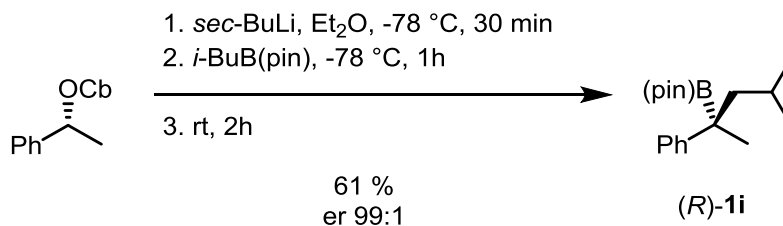

Prepared according to a literature known procedure.<sup>7</sup>

<sup>5</sup> Pulis, A. P.; Blair, D. J.; Torres, E.; Aggarwal, V. K.; *J. Am. Chem. Soc.*, **2013**, *135*, 16054.

<sup>6</sup> Bagutski, V.; French, R. M.; Aggarwal, V. K.; *Angew. Chem. Int. Ed.*, **2010**, *49*, 5142.

<sup>7</sup> Nave, S.; Sonawane, R. P.; Elford, T. G.; Aggarwal V. K.; *J. Am. Chem. Soc.* **2010**, *132*, 17096.



**(S)-2-(1-cyclopropyl-1-phenylethyl)-4,4,5,5-tetramethyl-1,3,2-dioxaborolane [(S)-1j]**

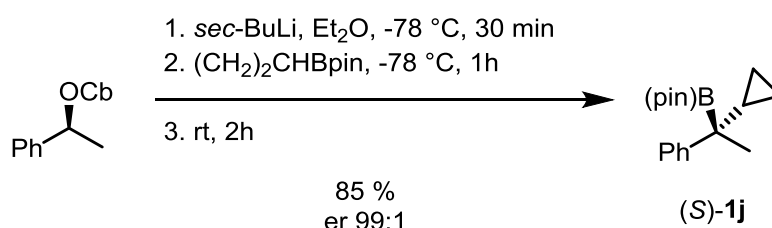

A solution of the (*S*)-1-phenylethyl diisopropylcarbamate (1.5 g, 6.02 mmol, 1.15 eq.) in Et<sub>2</sub>O (15.0 ml) was cooled to -78 °C and treated with *sec*-BuLi (4.3 mL, 6.02 mmol, 1.15 eq., 1.4 M in cyclohexane). The mixture was stirred for 30 min -78 °C and then a solution of cyclopropyl-B(pin) (955 μL, 5.24 mmol, 1.0 eq.) in Et<sub>2</sub>O (5.0 mL) was added dropwise. The reaction mixture was stirred at -78 °C for 1 h and at room temperature for 2 h. Water (15 mL) was added and the layers were separated. The aqueous layer was extracted with Et<sub>2</sub>O (3 x 15 mL). The combined organic layers were washed with brine (50 mL), dried over MgSO<sub>4</sub> and concentrated under vacuum. Purification by column chromatography on silica gel, eluting with petrol:Et<sub>2</sub>O (99:1) gave **1j** (1.2 g, 81%), which was obtained as an oil; er (*S*:*R*) 99:1; *R*<sub>f</sub> 0.33 (pentane:Et<sub>2</sub>O 95:5); [α]<sub>D</sub><sup>21</sup> 25 (*c* 1.0, CHCl<sub>3</sub>); IR (film): ν (cm<sup>-1</sup>) 3058, 2977, 1380, 1371, 1306, 849, 698; <sup>1</sup>H NMR (400 MHz, CDCl<sub>3</sub>) δ ppm 7.45–7.41 (m, 2H), 7.32–7.27 (m, 2H), 7.15 (m, 1H), 1.23 (s, 3H), 1.22 (s, 6H), 1.21 (s, 6H), 1.13 (m, 1H), 0.52–0.47 (m, 3H), 0.33 (m, 1H); <sup>13</sup>C NMR (100 MHz, CDCl<sub>3</sub>) δ ppm 148.4, 128.0, 127.2, 125.2, 83.3, 24.7, 24.6, 21.8, 18.6, 2.1, 1.6; <sup>11</sup>B NMR (96 MHz, NONE) δ ppm 32.9; HRMS (EI) calcd. for C<sub>17</sub>H<sub>25</sub>BO<sub>2</sub> [*M*]<sup>+</sup> 272.1948, found 272.1954.

**1j** was oxidised to the corresponding alcohol to determine enantiopurity:

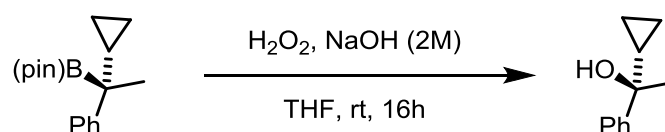

Resolution of the enantiomers of the alcohol was achieved by using a chiral SFC system fitted with a Chiracel IA column as the stationary phase with CO<sub>2</sub>: [*n*-hexane:*i*-PrOH (9:1 v:v)] as the mobile phase at a flow rate of 4.0 mL min<sup>-1</sup> (*P* = 125 bar). Injection volume: 20 μL of a 2 g L<sup>-1</sup> solution of the compound in the eluent. Under these conditions, the faster running component (*R*) and the slower running component (*S*) were eluted at 5.3 and 5.9 min., respectively, with a total analysis time of 15 min. [α]<sub>D</sub><sup>24</sup> 28 (*c* 0.5, CHCl<sub>3</sub>) in accordance with literature precedent ([α]<sub>D</sub><sup>24</sup> 28.5 (*c* 0.49, CHCl<sub>3</sub>)<sup>8</sup>).

<sup>8</sup> Stymiest, J. L.; Bagutski, V.; French, R. M.; Aggarwal, V. K.; *Nature*, **2008**, 456, 778.

Data in accordance with literature precedent.<sup>8</sup>

**(R)-2-(1-(4-Bromophenyl)-1-phenylethyl)-4,4,5,5-tetramethyl-1,3,2-dioxaborolane [(R)-1k]**

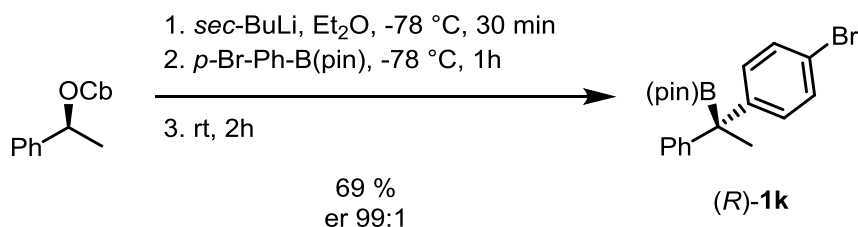

A solution of the (*S*)-1-phenylethyl diisopropylcarbamate (300 mg, 1.20 mmol, 1.2 eq.) in Et<sub>2</sub>O (5.0 ml) was cooled to -78 °C and treated with *sec*-BuLi (1.0 mL, 1.25 mmol, 1.25 eq., 1.4 M in cyclohexane). The mixture was stirred for 20 min at -78 °C and then a solution of *p*-Br-Ph-B(pin) (283 mg, 1.00 mmol, 1 eq.) in Et<sub>2</sub>O (1.0 mL) was added dropwise. The reaction mixture was stirred at -78 °C for 30 min and at room temperature for 2 h. Water (5 mL) was added and the layers were separated. The aqueous layer was extracted with Et<sub>2</sub>O (3 x 10 ml). The combined organic layers were washed with brine (30 ml), dried over MgSO<sub>4</sub> and concentrated under vacuum. Purification by column chromatography on silica gel, eluting with petrol:Et<sub>2</sub>O (99:1→95:5), gave (*R*)-1k (265 mg, 69%) as an amorphous solid; er (*R*:*S*) 99:1; *R*<sub>f</sub> 0.43 (petrol:Et<sub>2</sub>O 20:1); [ $\alpha$ ]<sub>D</sub><sup>22</sup> +8.6 (*c* 0.5, CHCl<sub>3</sub>); IR (film):  $\nu$  (cm<sup>-1</sup>) 2929, 2854, 1464, 1378, 1318, 1252, 1142, 1078, 1063, 836, 770; <sup>1</sup>H NMR (400 MHz, CDCl<sub>3</sub>)  $\delta$  ppm 7.39–7.33 (m, 2H), 7.29–7.22 (m, 2H), 7.21–7.13 (m, 3H), 7.12–7.06 (m, 2H), 1.65 (s, 3H), 1.20 (s, 6H), 1.19 (s, 6H); <sup>13</sup>C NMR (100 MHz, CDCl<sub>3</sub>)  $\delta$  ppm 147.1, 146.8, 131.0, 130.4, 128.4, 128.1, 125.6, 119.3, 83.9, 25.7, 24.5; <sup>11</sup>B NMR (96 MHz, CDCl<sub>3</sub>)  $\delta$  32.9 ppm; HRMS (EI) calcd. for C<sub>20</sub>H<sub>24</sub>BBro<sub>2</sub> [*M*]<sup>+</sup> 386.1053, found 386.1048.

1s was oxidised to the corresponding alcohol to aid in determining enantiopurity (see below):

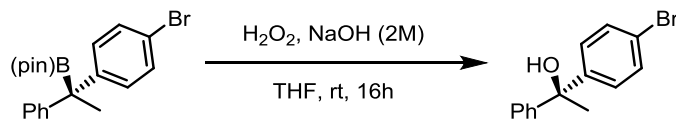

Resolution of the enantiomers of the alcohol was achieved by using a chiral SFC system fitted with a Chiralcel IB column as the stationary phase with CO<sub>2</sub>: [*n*-hexane:*i*-PrOH (1:1 v:v)] (95:5 v:v) as the mobile phase at a flow rate of 4.0 mL min<sup>-1</sup> (*P* = 125 bar). Injection volume: 20  $\mu$ L of a 2 g L<sup>-1</sup> solution of the compound in the eluent. Under these conditions,

the faster running component (*R*) and the slower running component (*S*) were eluted at 11.5 and 12.2 min., respectively, with a total analysis time of 15 min.

**(*R*)-4,4,5,5-Tetramethyl-2-(1-phenylethyl)-1,3,2-dioxaborolane [(*R*)-11]**

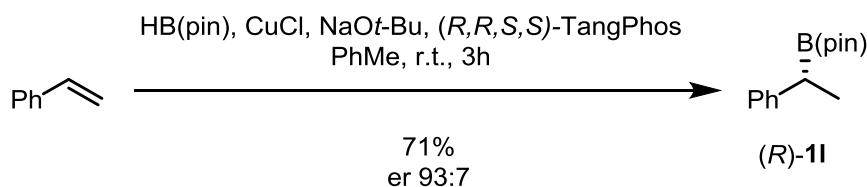

Prepared according to a literature known procedure.<sup>9</sup>

**4,4,5,5-Tetramethyl-2-((1*S*,2*R*,3*S*,6*R*)-3,7,7-trimethylbicyclo[4.1.0]heptan-2-yl)-1,3,2-dioxaborolane (**1m**)**

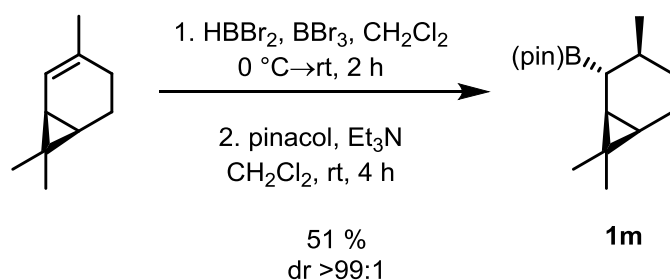

Following **GP1** (3.35 mmol scale), **1m** (448 mg, 51%) was obtained as an oil;  $R_f$  -0.27 (petrol: Et<sub>2</sub>O 98:2);  $[\alpha]_D^{20}$  -3.0 ( $c$  1.0, CHCl<sub>3</sub>); IR (film):  $\nu$  (cm<sup>-1</sup>) 2978, 2921, 2864, 1368, 1314, 1142; <sup>1</sup>H NMR (400 MHz, CDCl<sub>3</sub>)  $\delta$  ppm 1.86–1.76 (m, 1H), 1.71 (dd,  $J$  = 14.4, 6.7 Hz, 1H), 1.35 (dddd,  $J$  = 13.0, 7.7, 3.2, 1.8 Hz, 1H), 1.27 (s, 6H), 1.26 (s, 6H), 1.22 (m, 1H), 0.95 (s, 3H), 0.92 (s, 3H), 0.80 (d,  $J$  = 6.6 Hz, 3H), 0.65 (m, 1H), 0.57 (dd,  $J$  = 9.1, 5.0 Hz, 1H), 0.42 (t,  $J$  = 9.1 Hz, 1H), 0.35 (dd,  $J$  = 11.8, 5.0 Hz, 1H); <sup>13</sup>C NMR (100 MHz, CDCl<sub>3</sub>, CH-B not observed)  $\delta$  ppm 82.8, 31.7, 29.6, 24.7, 24.6, 22.5, 22.2, 19.6, 18.5, 17.9, 15.5; <sup>11</sup>B NMR (96 MHz, CDCl<sub>3</sub>)  $\delta$  ppm 32.0; LRMS 264 (GC-MS); HRMS (EI) calcd. for C<sub>16</sub>H<sub>29</sub>BO<sub>2</sub> [ $M$ ]<sup>+</sup> 264.2261, found 264.2266.

<sup>9</sup> Noh, D.; Chea, H.; Ju, J.; Yun, J.; *Angew. Chem. Int. Ed.*, **2009**, *48*, 6062.

**4,4,5,5-Tetramethyl-2-((1*R*,2*S*,3*R*,5*R*)-2,6,6-trimethylbicyclo[3.1.1]heptan-3-yl)-1,3,2-dioxaborolane (1n)**

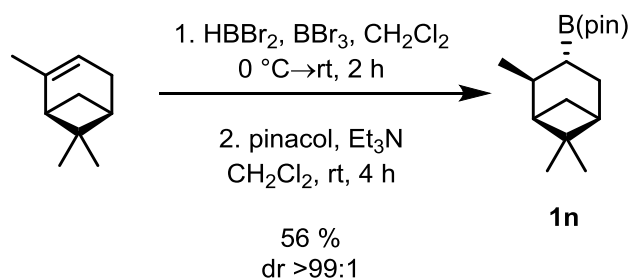

Following **GPI** (3.35 mmol scale), **1n** (490 mg, 56%) was obtained as an oil;  $R_f$  0.51 (petrol: Et<sub>2</sub>O 95:5);  $[\alpha]_D^{20}$  -10.0 ( $c$  1.0, CHCl<sub>3</sub>); IR (film):  $\nu$  (cm<sup>-1</sup>) 2978, 2897, 2870, 1369, 1346, 1311, 1144; <sup>1</sup>H NMR (400 MHz, CDCl<sub>3</sub>)  $\delta$  ppm 2.29 (ddd,  $J$  = 9.3, 6.3, 2.0 Hz, 1H), 2.14 (dq,  $J$  = 8.3, 7.4, 2.0 Hz, 1H), 2.04 (ddd,  $J$  = 12.0, 3.1, 2.0 Hz, 1H), 1.92–1.81 (m, 2H), 1.76 (td,  $J$  = 5.5, 2.0 Hz, 1H), 1.25 (s, 12H), 1.17 (s, 3H), 1.04 (s, 3H), 1.02 (s, 3H), 0.87–0.80 (m, 2H); <sup>13</sup>C NMR (100 MHz, CDCl<sub>3</sub>, CH–B not observed)  $\delta$  ppm 82.7, 47.9, 41.2, 38.5, 38.2, 34.1, 28.6, 28.4, 24.7, 24.6, 23.1, 22.7; <sup>11</sup>B NMR (96 MHz, CDCl<sub>3</sub>)  $\delta$  ppm 33.0; LRMS 264 (GC-MS); HRMS (ESI) calcd. for C<sub>16</sub>H<sub>30</sub>BO<sub>2</sub> [ $M+H$ ]<sup>+</sup> 265.2339, found 265.2336.

**(3*S*,5*R*,6*S*,8*R*,10*S*,13*R*,17*R*)-10,13-Dimethyl-17-((*R*)-6-methylheptan-2-yl)-6-(4,4,5,5-tetramethyl-1,3,2-dioxaborolan-2-yl)hexadecahydro-1*H*-cyclopenta[ $\alpha$ ]phenanthren-3-ol (1o)**

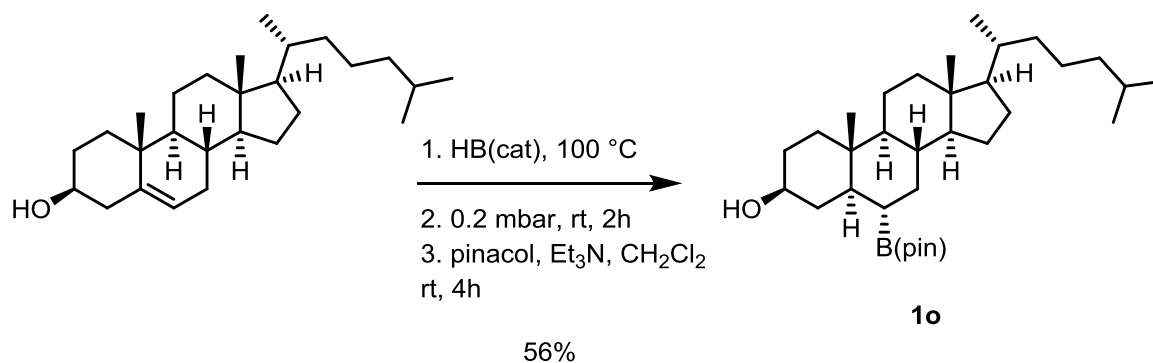

Freshly distilled catecholborane (1.4 mL, 13.36 mmol, 6.0 eq.) was added to a Schlenk flask containing cholesterol (2.2 g, 5.69 mmol, 1.0 eq.). The resulting mixture was heated to 100 °C at which point a solution formed. After 16 h at the same temperature, the mixture was cooled to room temperature and TLC analysis (petrol:EtOAc 7:3) revealed complete consumption of cholesterol. Excess catecholborane was removed under high vacuum (0.2 mbar, 2 h, r.t.). The crude material was diluted with CH<sub>2</sub>Cl<sub>2</sub> (15 mL) and Et<sub>3</sub>N (2.5 mL, 17.82 mmol, 8.0 eq.) and pinacol (788 mg, 6.68 mmol, 3.0 eq.) were added. After 1 h the mixture

was diluted with CH<sub>2</sub>Cl<sub>2</sub> (20 mL) and water (20 mL). The layers were separated and the aqueous layer was extracted with CH<sub>2</sub>Cl<sub>2</sub> (3 x 20 mL). The combined organics layers were dried over MgSO<sub>4</sub>, filtered, and concentrated under vacuum. Purification by column chromatography on silica gel, eluting with *n*-hexane:EtOAc (95:5→75:25) gave **1o** (592 mg, 52%) as an amorphous solid; *R*<sub>f</sub> 0.41 (petrol:EtOAc 7:3); mp 196–199 °C; [ $\alpha$ ]<sub>D</sub><sup>23</sup> +32.4 (*c* 1.0, CHCl<sub>3</sub>); IR (film):  $\nu$  (cm<sup>-1</sup>) 3229, 2929, 2865, 1371, 1315, 1143, 1043, 850; <sup>1</sup>H NMR (400 MHz, CDCl<sub>3</sub>)  $\delta$  ppm. 3.62 (tt, *J* = 10.5, 4.4 Hz, 1H), 1.95 (br d, *J* = 12.5 Hz, 1H), 1.85–1.75 (m, 2H), 1.71 (m, 1H), 1.64–1.44 (m, 5H), 1.32–1.29 (m, 5H), 1.24 (s, 16H), 1.15–0.95 (m, 10H), 0.94–0.84 (m, 11H) 0.80 (s, 3H), 0.68 (m, 1H), 0.61 (s, 3H); <sup>13</sup>C NMR (100 MHz, CDCl<sub>3</sub>)  $\delta$  ppm 82.9, 71.2, 56.2, 53.9, 45.3, 42.6, 40.0, 39.5, 37.7, 36.7, 36.2, 35.8, 35.6, 35.2, 33.5, 31.5, 28.2, 28.0, 24.8, 24.7, 24.2, 23.8, 22.8, 22.5, 21.2, 18.6, 12.4, 12.0; <sup>11</sup>B NMR (96 MHz, CDCl<sub>3</sub>)  $\delta$  ppm 32.1; LRMS 514 (GC-MS); HRMS (ESI) calcd. for C<sub>33</sub>H<sub>59</sub>BNaO<sub>3</sub> [*M*+Na]<sup>+</sup> 537.4455, found 537.4451.

***tert*-Butyl(((3*S*,5*R*,6*S*,8*R*,9*S*,10*S*,13*R*,14*S*,17*R*)-10,13-dimethyl-17-((*R*)-6-methylheptan-2-yl)-6-(4,4,5,5-tetramethyl-1,3,2-dioxaborolan-2-yl)hexadecahydro-1H-cyclopenta[ $\alpha$ ]phenanthren-3-yl)oxy)dimethylsilane (**1p**)**

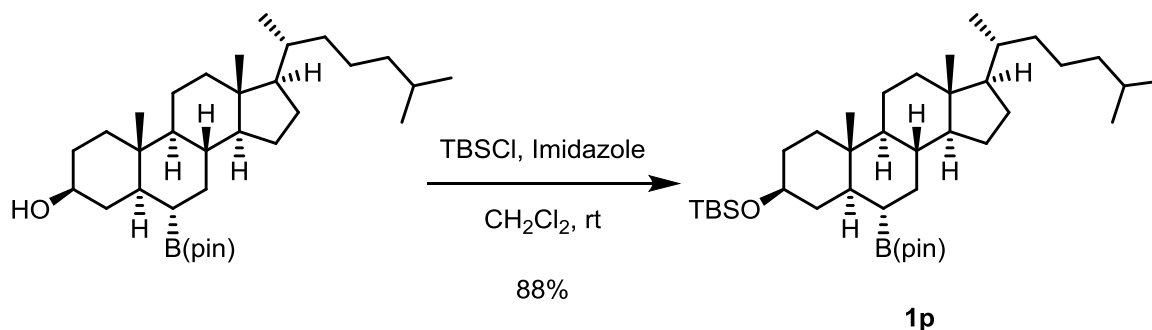

A solution of **1o** (150 mg, 0.29 mmol, 1.0 eq.) in CH<sub>2</sub>Cl<sub>2</sub> (3 mL) was cooled to 0 °C and imidazole (60 mg, 0.87 mmol, 3.0 eq.) and *tert*-butyldimethylsilyl chloride (132 mg, 0.87 mmol, 3.0 eq.) were added. The reaction mixture was allowed to warm to room temperature overnight and was quenched with water (3 mL). The layers were separated and the aqueous layer was extracted with CH<sub>2</sub>Cl<sub>2</sub> (3 x 10 mL). The combined organics layers were dried over MgSO<sub>4</sub>, filtered, and concentrated under vacuum. Purification by column chromatography on silica gel, eluting with *n*-hexane:EtOAc (99:1→97:3) gave **1p** (161 mg, 88%) as an amorphous solid; *R*<sub>f</sub> 0.55 (petrol:EtOAc 95:5); mp 180–182 °C; [ $\alpha$ ]<sub>D</sub><sup>22</sup> +8.6 (*c* 0.5, CHCl<sub>3</sub>); IR (film):  $\nu$  (cm<sup>-1</sup>) 2929, 2854, 1464, 1378, 1318, 1252, 1142, 1078, 1063, 836, 770; <sup>1</sup>H NMR (400 MHz, CDCl<sub>3</sub>)  $\delta$  ppm 3.57 (tt, *J* = 10.8, 4.5 Hz, 1H), 1.95 (dt, *J* = 12.5, 3.3 Hz,

1H), 1.79 (m, 1H), 1.70–1.60 (m, 3H), 1.60–1.40 (m, 5H), 1.40–1.27 (m, 5H), 1.24 (m, 14H), 1.06 (m, 11H), 0.91–0.78 (m, 19H), 0.78 (s, 3H), 0.72–0.61 (m, 1H), 0.56 (s, 3H), 0.04 (s, 3H), 0.03 (s, 3H); <sup>13</sup>C NMR (100 MHz, CDCl<sub>3</sub>) δ ppm 82.6, 71.9, 56.1, 56.0, 53.8, 45.3, 42.4, 39.9, 39.4, 37.9, 36.7, 36.0, 35.6, 35.4, 35.1, 33.4, 31.7, 28.1, 27.8, 25.8, 24.7, 24.6, 24.0, 23.7, 22.7, 22.4, 21.0, 18.5, 18.2, 12.3, 11.9, –4.7, –4.8; <sup>11</sup>B NMR (96 MHz, CDCl<sub>3</sub>) δ ppm 32.0; HRMS (ESI) calcd. for C<sub>39</sub>H<sub>73</sub>BNaO<sub>3</sub>Si [M+Na]<sup>+</sup> 651.5320, found 651.5321.

**2-((1*R*,2*R*,5*R*)-2-isopropyl-5-methylcyclohexyl)-4,4,5,5-tetramethyl-1,3,2-dioxaborolane (1q)**

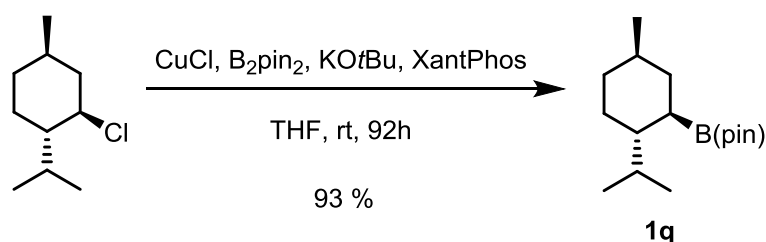

Prepared according to literature known procedure.<sup>10</sup>

**4,4,5,5-tetramethyl-2-(oxetan-3-yl)-1,3,2-dioxaborolane (1r)**

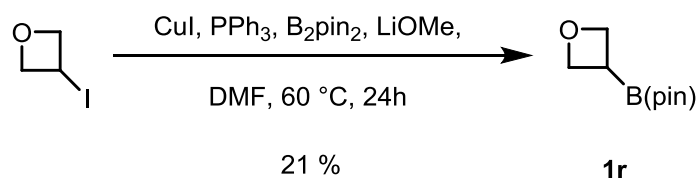

In air, CuI (9.5 mg, 0.05 mmol, 0.01 eq.), PPh<sub>3</sub> (183 mg, 0.07 mmol, 0.14 eq.), LiOMe (418 mg, 10.9 mmol, 2.0 eq.), and bis(pinacolato)diboron (2.1 g, 8.3 mmol, 1.5 eq.) were added to a Schlenk tube equipped with a stir bar. The vessel was evacuated and filled with nitrogen (three cycles). DMF (10.5 mL), 3-iodooxetane (920 mg, 0.5 mmol, 1.0 eq.) were added in turn by syringe under a nitrogen atmosphere. The resulting reaction mixture was stirred at 60 °C for 24 h. The reaction mixture was then diluted with Et<sub>2</sub>O (30 mL), filtered through silica gel with copious amount of Et<sub>2</sub>O. Evaporation of solvent under vacuum and purification by column chromatography eluting with *n*-hexane:EtOAc (75:25) gave **1r** (186 mg, 21%) as a solid; *R*<sub>f</sub> 0.12 (pentane:Et<sub>2</sub>O 85:15); mp. 24–26 °C; IR (film):  $\nu$  (cm<sup>-1</sup>) 2977, 2871, 1385,

<sup>10</sup> Ito H.; Kubota, K.; *Org. Lett.*, **2012**, *14*, 890.

1320, 1216, 1141, 857; <sup>1</sup>H NMR (400 MHz, CDCl<sub>3</sub>) δ ppm 4.70–4.55 (m, 4H), 2.59 (m, 1H), 1.13 (s, 12H); <sup>13</sup>C NMR (100 MHz, CDCl<sub>3</sub>, CH–B not observed) δ ppm 83.2, 73.0, 24.3; HRMS (CI) calcd. for C<sub>9</sub>H<sub>18</sub>BO<sub>3</sub> [M+H]<sup>+</sup> 185.1349, found 185.1342.

Prepared using a modification of a literature known procedure.<sup>11</sup>

**(R)-3-phenyl-3-(4,4,5,5-tetramethyl-1,3,2-dioxaborolan-2-yl)propanenitrile [(R)-1s]**

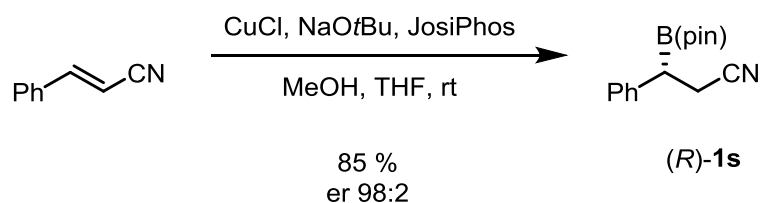

Prepared according to a literature known procedure.<sup>12</sup>

**(S)-tert-Butyl 2-(4,4,5,5-Tetramethyl-1,3,2-dioxaborolan-2-yl)pyrrolidine-1-carboxylate [(S)-1t]**

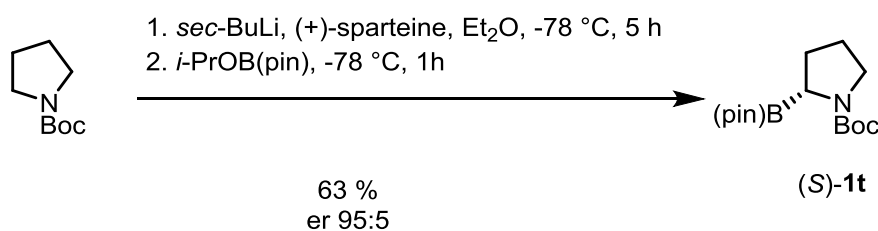

Prepared according to a literature known procedure.<sup>13</sup>

**(S)-2,2'-(4-phenylbutane-1,2-diyl)bis(4,4,5,5-tetramethyl-1,3,2-dioxaborolane) [(S)-1u]**

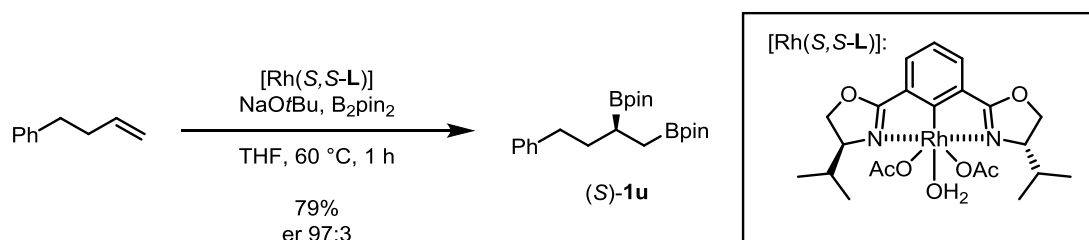

Prepared according to a literature known procedure.<sup>14</sup>

<sup>11</sup> Yang, C.-T.; Zhang, Z.-Q.; Tajuddin, H.; Wu, C.-C.; Liang, J.; Liu, J.-H.; Fu, Y.; Czyzewska, M.; Steel, P. G.; Marder, T. B.; Liu, L.; *Angew. Chem. Int. Ed.*, **2012**, *51*, 528.

<sup>12</sup> Lee, J.-E.; Yun, J.; *Angew. Chem. Int. Ed.*, **2008**, *47*, 145.

<sup>13</sup> Batsanov, A. S.; Grosjean, C.; Schutz, T.; Whiting, A.; *J. Org. Chem.*, **2007**, *72*, 6276.

#### 4. Oxidant/Electrophile Screening

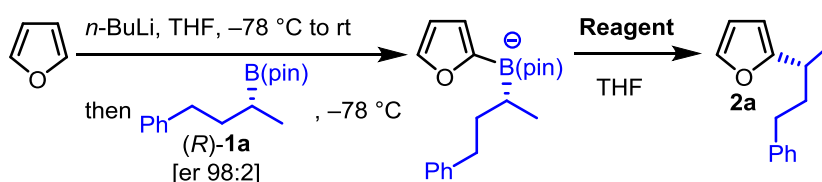

##### General Procedure for the Screening:

A solution of furan (44  $\mu\text{L}$ , 0.6 mmol, 1.2 eq.) in THF (2.0 mL) was cooled to  $-78\text{ }^\circ\text{C}$  and treated with *n*-BuLi (0.37 mL, 0.6 mmol, 1.2 eq., 1.6 M in hexanes). The cooling bath was removed and the mixture was stirred at room temperature for 1 h. The mixture was cooled to  $-78\text{ }^\circ\text{C}$  and (*R*)-**1a** (66 mg, 0.5 mmol, 1.0 eq.) was added dropwise as a solution in THF (1.0 mL). The mixture was stirred at  $-78\text{ }^\circ\text{C}$  for 1 h at which point  $^{11}\text{B}$  NMR spectroscopy showed complete formation of the ‘ate’ complex [ $^{11}\text{B}$  NMR (96 MHz, THF)  $\delta_{\text{B}} \sim 8$  ppm]. A solution of an oxidant/electrophile (0.6 mmol, 1.2 eq.) in THF (2.0 mL) was added dropwise. After 1 h at  $-78\text{ }^\circ\text{C}$ , a saturated aqueous solution of  $\text{Na}_2\text{S}_2\text{O}_3$  (2 mL) was added and the reaction mixture was allowed to warm to room temperature. The reaction mixture was diluted with  $\text{Et}_2\text{O}$  (15 mL) and water (15 mL). The layers were separated and the aqueous layer was extracted with  $\text{Et}_2\text{O}$ . The combined organic layers were dried over  $\text{MgSO}_4$ , filtered and concentrated under vacuum. The crude material was adsorbed on silica and purified by flash column chromatography on silica gel eluting with *n*-hexane to give (*R*)-**2a**.

| Entry | Reagent                           | T ( $^\circ\text{C}$ )      | time                     | Yield (%) | es (%) |
|-------|-----------------------------------|-----------------------------|--------------------------|-----------|--------|
| 1     | DDQ                               | $-78$                       | 5 min $\rightarrow$ 1 h  | 82        | 100    |
| 2     | DDQ                               | 0                           | 5 min                    | 20        | 100    |
| 3     | chloranil                         | $-78 \rightarrow \text{rt}$ | 5 min $\rightarrow$ 16 h | 0         | –      |
| 4     | $\text{Mn}(\text{OAc})_3$         | $-78 \rightarrow \text{rt}$ | 5 min $\rightarrow$ 16 h | 0         | –      |
| 5     | $\text{Cu}(\text{OAc})_2$         | $-78 \rightarrow \text{rt}$ | 5 min $\rightarrow$ 16 h | 0         | –      |
| 6     | CAN                               | $-78 \rightarrow \text{rt}$ | 5 min $\rightarrow$ 16 h | 0         | –      |
| 7     | $\text{WCl}_6$                    | $-78 \rightarrow \text{rt}$ | 5 min $\rightarrow$ 16 h | 0         | –      |
| 8     | $(p\text{-Br-Ph})_3\text{N}^{++}$ | $-78 \rightarrow \text{rt}$ | 5 min $\rightarrow$ 16 h | 0         | –      |
| 9     | $\text{I}_2$                      | $-78$                       | 5 min $\rightarrow$ 1 h  | 39        | –      |
| 10    | NIS                               | $-78$                       | 5 min $\rightarrow$ 1 h  | 42        | –      |
| 11    | NBS                               | $-78$                       | 5 min $\rightarrow$ 1 h  | 91        | 100    |
| 12    | NBS                               | 0                           | 5 min $\rightarrow$ 1 h  | 92        | 100    |
| 13    | NCS                               | $-78$                       | 5 min $\rightarrow$ 1 h  | 61        | –      |
| 14    | TCCA                              | $-78$                       | 5 min $\rightarrow$ 1 h  | <5        | –      |

<sup>14</sup> Toribatake, K.; Nishiyama, H.; *Angew. Chem. Int. Ed.*, **2013**, 52, 11011.



## 5. Reaction Products – Coupling to heterocycles

### (*R*)-2-(4-Phenylbutan-2-yl)furan [(*R*)-**2a**]

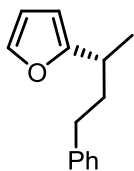

Following **GP2** (0.50 mmol scale), (*R*)-**2a** (91 mg, 91%) was obtained as an oil; er (*R*:*S*) 98:2;  $R_f$  0.82 (petrol:Et<sub>2</sub>O 95:5);  $[\alpha]_D^{23}$  -28.3 (*c* 0.5, CHCl<sub>3</sub>); IR (film):  $\nu$  (cm<sup>-1</sup>) 3114, 3085, 3063, 3027, 2966, 2927, 2858, 1454, 1008, 727, 697; <sup>1</sup>H NMR (400 MHz, CDCl<sub>3</sub>)  $\delta$  ppm 7.38 (br s, 1H), 7.36–7.31 (m, 2H), 7.26–7.21 (m, 3H), 6.35 (dd,  $J = 3.1, 1.9$  Hz, 1H), 6.07 (d,  $J = 3.1$  Hz, 1H), 2.92 (sx,  $J = 6.9$  Hz, 1H), 2.66 (t,  $J = 8.1$  Hz, 2H), 2.08 (m, 1H), 1.89 (m, 1H), 1.33 (d,  $J = 7.0$  Hz, 3H); <sup>13</sup>C NMR (100 MHz, CDCl<sub>3</sub>)  $\delta$  ppm 160.3, 142.4, 140.7, 128.4, 128.3, 125.8, 109.9, 103.8, 37.6, 33.5, 32.8, 19.3; HRMS (CI) calcd. for C<sub>14</sub>H<sub>16</sub>O [*M*]<sup>+</sup> 200.1201, found 200.1210.

Resolution of the enantiomers of **2a** was achieved by using a chiral HPLC system fitted with a Chiralpak AD-H column with guard as the stationary phase with *n*-hexanes the mobile phase at a flow rate of 0.2 mL min<sup>-1</sup> ( $T = 0$  °C). Injection volume: 20  $\mu$ L of a 2 g L<sup>-1</sup> solution of compound in the eluent. Under these conditions, the faster running component (*R*) and the slower running component (*S*) were eluted at 51.1 and 56.1 min., respectively, with a total analysis time of 75 min.

Coupling in the presence of DDQ was performed following **GP3** and resulted in 82% yield and 100% e.s.

### (*S*)-2-(4-Methyl-1-phenylpentan-3-yl)furan [(*S*)-**2c**]

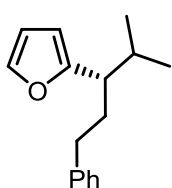

Following **GP2** (0.50 mmol scale), (*S*)-**2c** (105 mg, 92%) was obtained as an oil; er (*S*:*R*) 97:3;  $R_f$  0.90 (petrol:Et<sub>2</sub>O 95:5);  $[\alpha]_D^{25}$  -9.0 (*c* 1.0, CHCl<sub>3</sub>); IR (film):  $\nu$  (cm<sup>-1</sup>) 3112, 3085, 3063, 3027, 2957, 2929, 2870, 1454, 1009, 727, 697; <sup>1</sup>H NMR (400 MHz, CDCl<sub>3</sub>)  $\delta$  ppm 7.40 (br s, 1H), 7.35–7.27 (m, 2H), 7.25–7.16 (m, 3H), 6.35 (dd,  $J = 3.0, 1.9$  Hz, 1H), 6.07 (d,  $J = 3.0$  Hz, 1H), 2.63–2.53 (m, 2H), 2.47 (m, 1H), 2.08–1.96 (m, 2H), 1.92 (app. oct,  $J = 6.8$  Hz, 1H), 0.95 (d,  $J = 6.8$  Hz, 3H), 0.85 (d,  $J = 6.8$  Hz, 3H); <sup>13</sup>C NMR (100 MHz, CDCl<sub>3</sub>)  $\delta$  ppm 157.7, 142.6, 140.7, 128.4, 128.3, 125.7, 109.8, 106.2, 45.4, 34.1, 33.1, 32.2, 20.8, 19.8; HRMS (EI) calcd. for C<sub>16</sub>H<sub>20</sub>O [*M*+H]<sup>+</sup> 228.1514, found 228.1516.

Resolution of the enantiomers of **2c** was achieved using a chiral GC system fitted with a Supelco DM column. Injector  $T = 250$  °C, detector  $T = 300$  °C. Oven conditions:  $T = 70$  °C for 3 min then ramp (1 °C min<sup>-1</sup>) until 180 °C, H<sub>2</sub> carrier gas at 14 psi. Under these

conditions, the faster running component (*R*) and the slower running component (*S*) were eluted at 64.6 and 64.7 min respectively with a total analysis time of 75 min.

Coupling in the presence of DDQ was performed following **GP3** and resulted in 67% yield and 100% e.s.

#### (*R*)-2-(1-(4-methoxyphenyl)-7-methyloct-6-en-3-yl)furan [(*R*)-**2d**]

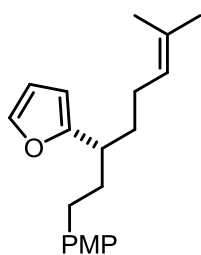

Following **GP2** (0.28 mmol scale), (*R*)-**2d** (78 mg, 94%) was obtained as an oil; er (*R*:*S*) 92:8;  $R_f$  0.63 (petrol:Et<sub>2</sub>O 95:5);  $[\alpha]_D^{22}$  -8.7 (*c* 1.3, CHCl<sub>3</sub>); IR (film):  $\nu$  (cm<sup>-1</sup>) 2928, 2857, 1511, 1244, 1176, 1037, 728; <sup>1</sup>H NMR (400 MHz, CDCl<sub>3</sub>)  $\delta$  ppm 7.35 (br s, 1H), 7.11–7.04 (m, 2H), 6.86–6.80 (m, 2H), 6.32 (dd,  $J$  = 3.1, 1.9 Hz, 1H), 6.03 (br d,  $J$  = 3.1 Hz, 1H), 5.08 (m, 1H), 3.80 (s, 3H), 2.72 (m, 1H), 2.55–2.39 (m, 2H), 1.99–1.81 (m, 4H), 1.78–1.56 (m, 2H), 1.68 (s, 3H), 1.54 (s, 3H); <sup>13</sup>C NMR (100 MHz, CDCl<sub>3</sub>)  $\delta$  ppm 158.6, 157.7, 140.7, 134.5, 131.6, 129.2, 124.2, 113.7, 109.8, 105.2, 55.2, 38.1, 36.2, 34.3, 32.6, 25.7, 25.7, 17.6; HRMS (EI) calcd. for C<sub>20</sub>H<sub>26</sub>O<sub>2</sub> [ $M$ ]<sup>+</sup> 298.1933, found 298.1935.

Resolution of the enantiomers of **2d** was achieved using a chiral HPLC system fitted with a Chiralpak IB column with guard as the stationary phase with 99:1 [*n*-hexanes:(10 % *i*-PrOH in *n*-hexanes)] the mobile phase at a flow rate of 0.5 mL min<sup>-1</sup> ( $T$  = 0 °C). Injection volume: 5  $\mu$ L of a 2 g L<sup>-1</sup> solution of compound in the eluent. Under these conditions, the faster running component (*R*) and the slower running component (*S*) were eluted at 16.4 and 17.5 min., respectively, with a total analysis time of 35 min.

#### (*R*)-*tert*-Butyl 4-(furan-2-yl)-6-phenylhexanoate [(*R*)-**2e**]

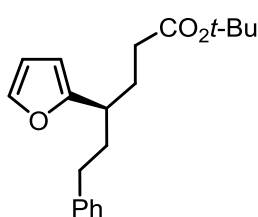

Following **GP2** (0.50 mmol scale), (*R*)-**2e** (142 mg, 90%) was obtained as an oil; er (*R*:*S*) 96:4;  $R_f$  0.72 (petrol:Et<sub>2</sub>O 95:5);  $[\alpha]_D^{21}$  +8.0 (*c* 1.0, CHCl<sub>3</sub>); IR (film):  $\nu$  (cm<sup>-1</sup>) 3063, 3027, 2977, 2931, 2862, 1726, 1366, 1146, 729, 698; <sup>1</sup>H NMR (400 MHz, CDCl<sub>3</sub>)  $\delta$  ppm 7.37 (dd,  $J$  = 1.8, 0.7 Hz, 1H), 7.31–7.26 (m, 2H), 7.22–7.14 (m, 3H), 6.33 (dd,  $J$  = 3.2, 1.8 Hz, 1H), 6.07 (d,  $J$  = 3.2 Hz, 1H), 2.80–2.72 (m, 1H), 2.62–2.48 (m, 2H), 2.22–2.10 (m, 2H), 2.08–1.86 (m, 4H), 1.44 (s, 9H); <sup>13</sup>C NMR (400 MHz, CDCl<sub>3</sub>)  $\delta$  ppm 172.8, 157.4, 142.1, 141.1, 128.4, 128.3, 125.8, 109.9, 105.9, 80.1, 38.0, 35.9, 33.5, 33.3, 29.5, 28.1; HRMS (EI) calcd. for C<sub>20</sub>H<sub>26</sub>O<sub>3</sub> [ $M$ ]<sup>+</sup> 314.1882, found 314.1870.

Resolution of the enantiomers of **2e** was achieved using a chiral HPLC system fitted with a Chiralpak IB column with guard as the stationary phase with *n*-hexane:*i*-PrOH (99:1 v:v) as

the mobile phase at a flow rate of 0.5 mL min<sup>-1</sup> (*T* = 20 °C). Injection volume: 20 μL of a 2 g L<sup>-1</sup> solution of the compound in the eluent. Under these conditions, the faster running component (*R*) and the slower running component (*S*) were eluted at 9.5 and 10.3 min., respectively, with a total analysis time of 30 min.

Coupling in the presence of DDQ was performed following **GP3** and resulted in 71% yield and 100% e.s.

#### (*R*)-2-(7-azido-1-(4-methoxyphenyl)heptan-3-yl)furan [(*R*)-**2f**]

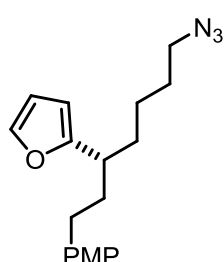

Following **GP2** (0.23 mmol scale), (*R*)-**2f** (52 mg, 71%) was obtained as an oil; er (*R*:*S*) 96:4; *R*<sub>f</sub> 0.32 (petrol:Et<sub>2</sub>O 95:5); [*α*]<sub>D</sub><sup>24</sup> - 11 (*c* 0.6, CHCl<sub>3</sub>); IR (film): *ν* (cm<sup>-1</sup>) 2935, 2860, 2091, 1510, 1243, 1036, 730; <sup>1</sup>H NMR (400 MHz, CDCl<sub>3</sub>) *δ* ppm 7.36 (dd, *J* = 1.9, 0.8 Hz, 1H), 7.10–7.05 (m, 2H), 6.86–6.81 (m, 2H), 6.33 (dd, *J* = 3.1, 1.9 Hz, 1H), 6.05 (br d, *J* = 3.1 Hz, 1H), 3.60 (s, 3H), 3.26–3.18 (m, 2H), 2.70 (m, 1H), 2.56–2.39 (m, 2H), 2.01–1.80 (m, 2H), 1.73–1.47 (m, 4H), 1.36–1.22 (m, 2H); <sup>13</sup>C NMR (100 MHz, CDCl<sub>3</sub>) *δ* ppm 158.2, 157.7, 140.8, 134.2, 129.2, 113.7, 109.8, 105.4, 55.2, 51.3, 38.4, 36.2, 33.8, 32.6, 28.8, 24.4; HRMS (EI) calcd. for C<sub>18</sub>H<sub>23</sub>N<sub>3</sub>O<sub>2</sub> [*M*]<sup>+</sup> 313.1790, found 313.1786.

Resolution of the enantiomers of **2f** was achieved using a chiral SFC system fitted with a Chiracel IB column as the stationary phase with CO<sub>2</sub>:*n*-hexane as the mobile phase at a flow rate of 4.0 mL min<sup>-1</sup> (*P* = 125 bar). Injection volume: 10 μL of a 2 g L<sup>-1</sup> solution of compound in the eluent. Under these conditions, the faster running component (*R*) and the slower running component (*S*) were eluted at 8.8 and 10.0 min., respectively, with a total analysis time of 15 min.

#### (*R*)-2-(1-Phenylethyl)furan [(*R*)-**2l**]

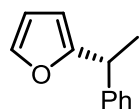

Following **GP2** (0.5 mmol scale), (*R*)-**2l** (80 mg, 93%) was obtained as an oil; er (*R*:*S*) 93:7; *R*<sub>f</sub> 0.90 (petrol:Et<sub>2</sub>O 95:5); [*α*]<sub>D</sub><sup>23</sup> -24.3 (*c* 1, CHCl<sub>3</sub>) [Lit. for (*R*)-**2l** [*α*]<sub>D</sub><sup>20</sup> -40.9 (*c* 0.88, CHCl<sub>3</sub>), er (*R*:*S*) 98:2]<sup>13</sup>; <sup>1</sup>H NMR (CDCl<sub>3</sub>, 400 MHz) *δ* ppm 7.36–7.16 (m, 6H), 6.29 (dd, *J* = 3.2, 1.8 Hz, 1H), 6.05 (dt, *J* = 3.2, 0.9 Hz, 1H), 4.12 (q, *J* = 7.2, 1H), 1.60 (d, *J* = 7.2 Hz, 3H); <sup>13</sup>C NMR (CDCl<sub>3</sub>, 100 MHz) *δ* ppm 159.0, 144.1, 141.3, 128.5, 127.3, 126.5, 109.9, 104.9, 39.2, 20.5.

Resolution of the enantiomers of **2l** was achieved using a chiral HPLC system fitted with a Chiralpak IB column with guard as the stationary phase with *n*-hexane as the mobile phase at a flow rate of 0.3 mL min<sup>-1</sup> (*T* = 5 °C). Injection volume: 20 μL of a 2 g L<sup>-1</sup> solution of the

compound in the eluent. Under these conditions, the faster running component (*R*) and the slower running component (*S*) were eluted at 39.6 and 41.7 min., respectively, with a total analysis time of 60 min.

Data in accordance with the literature.<sup>15</sup>

The stereospecificity of the process has been determined to be retentive by comparing the chiral HPLC traces and the optical rotation of this compound with the literature.<sup>15</sup>

### 2-((1*R*,2*R*,3*S*,6*R*)-3,7,7-Trimethylbicyclo[4.1.0]heptan-2-yl)furan (**2m**)

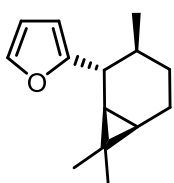

Following **GP2** (0.5 mmol scale), **2m** (69 mg, 68%) was obtained as an oil;  $R_f$  0.77 (petrol: Et<sub>2</sub>O 95:5);  $[\alpha]_D^{22}$  -34.0 (*c* 1.0, CHCl<sub>3</sub>); IR (film):  $\nu$  (cm<sup>-1</sup>) 2922, 2864, 1458, 1375, 1148, 1009, 792, 724; <sup>1</sup>H NMR (400 MHz, CDCl<sub>3</sub>)  $\delta$  ppm 7.35 (dd, *J* = 1.8, 0.8 Hz, 1H), 6.32 (dd, *J* = 3.1, 1.9 Hz, 1H), 6.04 (dd, *J* = 3.1, 0.6 Hz, 1H), 2.08 (dd, *J* = 11.5, 4.7 Hz, 1H), 1.90 (ddt, *J* = 14.5, 11.5, 7.9 Hz, 1H), 1.76 (ddt, *J* = 14.0, 6.8, 1.3 Hz, 1H), 1.55 (dddd, *J* = 14.0, 7.9, 3.6, 1.8 Hz, 1H), 1.47 (m, 1H), 1.05 (s, 3H), 1.00 (s, 3H), 0.92–0.81 (m, 2H), 0.71 (d, *J* = 6.5 Hz, 3H), 0.65 (td, *J* = 8.0, 1.3 Hz, 1H); <sup>13</sup>C NMR (100 MHz, CDCl<sub>3</sub>)  $\delta$  ppm 160.5, 140.5, 109.8, 104.6, 39.2, 33.2, 31.6, 29.4, 26.7, 20.2, 19.6, 19.3, 17.6, 15.6; HRMS (EI) calcd. for C<sub>14</sub>H<sub>20</sub>O [*M*]<sup>+</sup> 204.1516, found 204.1514.

Coupling in the presence of DDQ was performed following **GP3** and resulted in 58% yield and 100% e.s.

### 2-((1*R*,2*R*,3*R*,5*S*)-2,6,6-Trimethylbicyclo[3.1.1]heptan-3-yl)furan (**2n**)

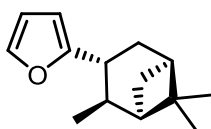

Following **GP2** (0.50 mmol scale), **2n** (84 mg, 82%) was obtained as an oil;  $R_f$  0.84 (petrol:Et<sub>2</sub>O 95:5);  $[\alpha]_D^{21}$  -34.0 (*c* 0.5, CHCl<sub>3</sub>); IR (film):  $\nu$  (cm<sup>-1</sup>) 2924, 2902, 2870, 1507, 1454, 1150, 1008, 796, 784, 691; <sup>1</sup>H NMR (400 MHz, CDCl<sub>3</sub>)  $\delta$  ppm 7.35 (dd, *J* = 1.9, 0.9 Hz, 1H), 6.32 (dd, *J* = 3.0, 1.9 Hz, 1H), 6.04 (dd, *J* = 3.1, 0.8 Hz, 1H), 3.07 (dt, *J* = 10.5, 7.3 Hz, 1H), 2.44–2.30 (m, 2H), 2.21 (pd, *J* = 7.3, 2.0, 1H), 2.06–1.98 (m, 2H), 1.88 (td, *J* = 6.2, 2.0 Hz, 1H), 1.26 (s, 3H), 1.13–1.05 (m, 7H); <sup>13</sup>C NMR (100 MHz, CDCl<sub>3</sub>)  $\delta$  ppm 161.4, 141.0, 109.8, 103.4, 47.6, 42.3, 41.4, 38.6, 36.5, 34.1, 33.5, 28.3, 23.0, 21.6; HRMS (CI) calcd. for C<sub>14</sub>H<sub>21</sub>O [*M*+H]<sup>+</sup> 205.1592, found 205.1607.

<sup>15</sup> Fessard, T. C.; Andrews S. P.; Motoyoshi, H.; Carreira, E. M.; *Angew. Chem. Int. Ed.*, **2007**, 46, 9331.

Coupling in the presence of DDQ was performed following **GP3** and resulted in 62% yield and 100% e.s.

**(3*S*,5*R*,6*S*,8*S*,10*R*,13*R*,17*R*)-6-(Furan-2-yl)-10,13-dimethyl-17-((*R*)-6-methylheptan-2-yl)hexadecahydro-1*H*-cyclopenta[ $\alpha$ ]phenanthren-3-ol (**2o**)**

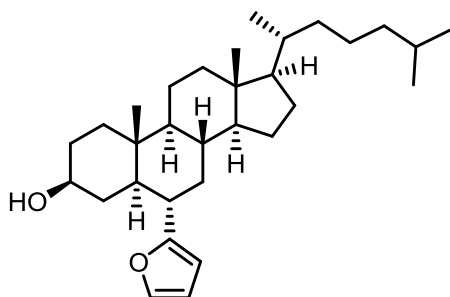

A solution of furan (31  $\mu$ L, 0.43 mmol, 2.2 eq.) in THF (2.0 mL) was cooled to  $-78$   $^{\circ}$ C and treated with *n*-BuLi (0.3 mL, 0.43 mmol, 2.2 eq., 1.6 M in hexanes). The mixture was stirred at  $-78$   $^{\circ}$ C for 30 min. and at r.t. for 30 min. The mixture was cooled to  $-78$   $^{\circ}$ C and a solution of **1o** (100 mg, 0.19 mmol, 1.0 eq.) in THF (2.0 mL) was added dropwise. The mixture was stirred at  $-78$   $^{\circ}$ C for 1 h at which point  $^{11}$ B NMR spectroscopy showed complete formation of the boron-ate complex [ $^{11}$ B NMR (96 MHz, THF)  $\delta_{\text{B}} \sim 8$  ppm]. A solution of NBS (62 mg, 0.23 mmol, 1.2 eq.) in THF (2.0 mL) was added dropwise. The mixture was stirred at  $-78$   $^{\circ}$ C for 16 h at which point saturated aqueous solution of  $\text{Na}_2\text{S}_2\text{O}_3$  (1 mL) was added. The reaction mixture was diluted with  $\text{Et}_2\text{O}$  (10 mL) and washed with water (15 mL). The aqueous layer was extracted with  $\text{Et}_2\text{O}$  (2 x 15 mL). The combined organic layers were dried over  $\text{MgSO}_4$ , filtered and concentrated under vacuum. Purification by flash column chromatography on silica gel, eluting with petrol:EtOAc (95:55 $\rightarrow$ 85:15) gave **2o** (69 mg, 78 %) as a solid;  $R_f$  0.77 (petrol:EtOAc 7:3); mp. 126-130  $^{\circ}$ C;  $[\alpha]_{\text{D}}^{22} + 21.9$  (*c* 0.73,  $\text{CHCl}_3$ ); IR (film):  $\nu$  ( $\text{cm}^{-1}$ ) 3256, 2931, 2855, 1467, 1381, 1073, 1049, 1009, 796, 724;  $^1\text{H}$  NMR (400 MHz,  $\text{CDCl}_3$ )  $\delta$  ppm 7.28 (dd,  $J = 1.8, 0.6$  Hz, 1H), 6.26 (dd,  $J = 3.1, 1.8$  Hz, 1H), 5.95 (dd,  $J = 3.1, 0.6$  Hz, 1H), 3.49 (tt,  $J = 11.0, 4.8$  Hz, 1H), 2.60 (td,  $J = 12.0, 3.6$  Hz, 1H), 1.83–1.73 (m, 4H), 1.58–1.45 (m, 5H), 1.39–1.22 (m, 7H), 1.20–0.97 (m, 12H), 0.92–0.84 (m, 13H), 0.77 (m, 1H) 0.67 (s, 3H);  $^{13}\text{C}$  NMR (100 MHz,  $\text{CDCl}_3$ )  $\delta$  ppm 159.1, 140.5, 109.8, 104.6, 71.3, 56.2, 56.2, 53.9, 48.6, 42.6, 40.0, 39.5, 38.1, 38.0, 37.0, 36.1, 35.9, 35.8, 35.1, 34.9, 31.1, 28.2, 28.0, 24.1, 23.8, 22.8, 22.5, 21.3, 18.7, 12.9, 12.1, 1.0; HRMS (ESI) calcd. for  $\text{C}_{31}\text{H}_{51}\text{O}_2$  [ $M+\text{H}$ ] $^+$  455.3884, found 455.3865.

**2-((1*R*,2*S*,5*R*)-2-isopropyl-5-methylcyclohexyl)furan (**2q**)**

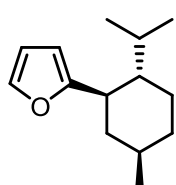

Following **GP2** (0.45 mmol scale), **2q** (63 mg, 80%) was obtained as an oil;  $R_f$  0.91 (pentane:Et $_2$ O 99:1);  $[\alpha]_{\text{D}}^{23} - 45$  (*c* 1,  $\text{CHCl}_3$ ); IR (film):  $\nu$  ( $\text{cm}^{-1}$ ) 3675, 2954, 2918, 1594, 1505, 1455, 1385, 1368, 1347, 1321, 1238, 1222,

1171, 1148, 1073, 1056, 1009, 977, 949, 938, 914, 885, 874, 794, 725, 691, 599, 526;  $^1\text{H}$  NMR (400 MHz,  $\text{CDCl}_3$ )  $\delta$  ppm 7.28 (dd,  $J = 1.8, 0.8$  Hz, 1H), 6.27 (dd,  $J = 3.1, 1.8$  Hz, 1H), 5.95 (dd,  $J = 3.1, 0.8$  Hz, 1H), 2.57 (td,  $J = 11.8, 3.4$  Hz, 1H), 1.86–1.75 (m, 2H), 1.71 (dq,  $J = 12.8, 3.1$  Hz, 1H), 1.52–1.37 (m, 3H), 1.27 (m, 1H), 1.10 (m, 1H), 0.99 (m, 1H), 0.91 (d,  $J = 6.5$  Hz, 3H), 0.84 (d,  $J = 6.8$  Hz, 3H), 0.72 (d,  $J = 6.8$  Hz, 3H);  $^{13}\text{C}$  NMR (100 MHz,  $\text{CDCl}_3$ )  $\delta$  ppm 159.7, 140.2, 109.8, 104.1, 46.8, 42.0, 40.9, 35.0, 32.9, 28.3, 24.8, 22.4, 21.2, 15.7; HRMS (EI) calcd. for  $\text{C}_{14}\text{H}_{22}\text{O}$  [ $M$ ] $^+$  206.1671, found 206.1673.

### 2-(oxetan-3-yl)furan (2r)

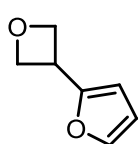

Following **GP2** (0.22 mmol scale), **2r** (10 mg, 38%) was obtained as an oil;  $R_f$  0.41 (pentane:Et<sub>2</sub>O 85:15); IR (film):  $\nu$  ( $\text{cm}^{-1}$ ) 2958, 2881, 1148, 979, 931, 734;  $^1\text{H}$  NMR (400 MHz,  $\text{CDCl}_3$ )  $\delta$  ppm 7.40 (br s, 1H), 6.35 (m, 1H), 6.20 (d,  $J = 3.2$  Hz, 1H), 4.94 (dd,  $J = 8.3, 5.8$  Hz, 2H), 4.90–4.84 (m, 2H), 4.32 (qi,  $J = 8.3$  Hz, 1H);  $^{13}\text{C}$  NMR (100 MHz,  $\text{CDCl}_3$ )  $\delta$  ppm 154.1, 141.9, 110.4, 105.7, 76.5, 33.9; HRMS (EI) calcd. for  $\text{C}_7\text{H}_8\text{O}_2$  [ $M$ ] $^+$  124.0524, found 124.0529.

### (R)-3-(furan-2-yl)-3-phenylpropanenitrile [(R)-2s]

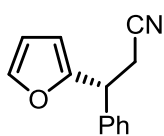

A solution of furan (36  $\mu\text{L}$ , 0.48 mmol) in THF (2.0 mL) was cooled to  $-78$   $^\circ\text{C}$  and treated with *n*-BuLi (0.2 mL, 0.32 mmol, 1.6 M in hexanes). The mixture was stirred at room temperature for 1 h. The mixture was cooled to  $-98$   $^\circ\text{C}$  (MeOH/ liquid N<sub>2</sub>) and a solution of boronic ester (**R**)-**1s** (84.8 mg, 0.33 mmol, 1.0 eq.) in THF (1.0 mL) was added dropwise. The reaction was stirred at  $-98$   $^\circ\text{C}$  during 1 h at which time possible excess of organolithium was quench adding 200  $\mu\text{L}$  of EtOH to the reaction mixture.  $^{11}\text{B}$  NMR spectroscopy showed complete formation of the boron-ate complex [ $^{11}\text{B}$  NMR (96 MHz, THF)  $\delta_B \sim 8$  ppm]. The mixture was kept at  $-98$   $^\circ\text{C}$  and a solution of NBS (69 mg, 0.38 mmol, 1.15 eq.) in THF (2.0 mL) was added dropwise and allowed to warm to r.t. for 1h. At this point saturated aqueous solution of Na<sub>2</sub>S<sub>2</sub>O<sub>3</sub> (1 mL) was added. The reaction mixture was diluted with Et<sub>2</sub>O (10 mL) and washed with water (15 mL). The aqueous layer was extracted with Et<sub>2</sub>O (2 x 15 mL). The combined organic layers were dried over MgSO<sub>4</sub>, filtered and concentrated under vacuum. Purification by column chromatography on silica gel, eluting with petrol:Et<sub>2</sub>O (95:5→7:3) gave (**R**)-**2s** (mg, 90 %) as an oil; er (**R**:**S**) 98:2;  $R_f$  0.25 (petrol:Et<sub>2</sub>O 8:2) [ $\alpha$ ]<sub>D</sub><sup>22</sup> 33;  $^1\text{H}$  NMR (400 MHz,  $\text{CDCl}_3$ )  $\delta$  ppm; 7.41–7.35 (m, 3H), 7.34–7.26 (m, 3H) 6.34 (dd,  $J = 3.2, 1.9$  Hz, 1H), 6.17 (d, 1H,  $J = 3.2$  Hz, 1H), 4.39 (t,  $J =$

7.3 Hz, 1H), 3.09 (dd,  $J = 16.7, 7.3$  Hz, 1H), 2.96 (dd,  $J = 16.7, 7.3$  Hz, 1H).  $^{13}\text{C}$  NMR (100 MHz,  $\text{CDCl}_3$ )  $\delta$  ppm 153.6, 142.4, 139.0, 129.0, 127.9, 127.5, 117.8, 110.4, 107.1, 41.7, 23.5.

Data in accordance with literature.<sup>16</sup>

Resolution of the enantiomers of **2s** was achieved using a chiral SFC system fitted with a Chiralcel Whelk-01 column as the stationary phase with  $\text{CO}_2$ : [*n*-hexane:*i*-PrOH (1:1 v:v)] as the mobile phase at a flow rate of a  $2.0 \text{ mL min}^{-1}$  ( $P = 125$  bar). Injection volume:  $10 \mu\text{L}$  of a  $2 \text{ g L}^{-1}$  solution of compound in the eluent. Under these conditions, the faster running component (*R*) and the slower running component (*S*) were eluted at 11.6 and 12.5 min., respectively, with a total analysis time of 20 min.

#### **(*R*)-tert-butyl 2-(furan-2-yl)pyrrolidine-1-carboxylate [(*R*)-2t]**

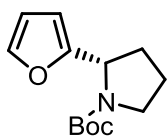

Following **GP2**, (0.25 mmol scale), (*R*)-**2t** (56 mg, 74%) was obtained as an oil; er (*R*:*S*) 93:7;  $R_f$  0.24 (petrol:EtOAc 95:5);  $[\alpha]_D^{22} -90.6$  ( $c$  1.0,  $\text{CHCl}_3$ ); IR (film):  $\nu$  ( $\text{cm}^{-1}$ ) 2974, 2929, 2879, 1693, 1387, 1365, 1159, 1111, 1007, 729;  $^1\text{H}$  NMR (400 MHz,  $\text{CDCl}_3$ , broad signals due to rotamers)  $\delta$  7.29 (dd,  $J = 1.8, 0.9$  Hz, 1H), 6.28 (dd,  $J = 3.2, 1.8$  Hz, 1H), 6.17-5.99 (br m, 1H), 4.97 & 4.84 (br s, 1H), 3.54 (br s, 1H), 3.45 (br s, 1H), 2.13 (br s, 1H), 2.08–1.97 (m, 2H), 1.89 (m, 1H), 1.45 & 1.35 (br s, 9H);  $^{13}\text{C}$  NMR (100 MHz,  $\text{CDCl}_3$ , broad signals due to rotamers)  $\delta$  154.4, 141.0, 110.0, 105.2, 79.3, 54.7 & 54.5, 46.3 & 46.0, 32.2 & 31.9, 28.3, 24.2 & 23.6; HRMS (CI) calcd. for  $\text{C}_{13}\text{H}_{20}\text{NO}_3$   $[M+H]^+$  238.1443, found 238.1443.

Resolution of the enantiomers of **2t** was achieved using a chiral SFC system fitted with a Chiralcel Whelk-01 column as the stationary phase with  $\text{CO}_2$ : [*n*-hexane:*i*-PrOH (1:1 v:v)] (9:1 v:v) as the mobile phase at a flow rate of  $4.0 \text{ mL min}^{-1}$  ( $P = 125$  bar). Injection volume:  $20 \mu\text{L}$  of a  $2 \text{ g L}^{-1}$  solution of compound in the eluent. Under these conditions, the faster running component (*S*) and the slower running component (*R*) were eluted at 4.7 and 6.7 min., respectively, with a total analysis time of 15 min.

<sup>16</sup> Arutyunyan, N. S.; Akopyan, L. A.; Gevorgyan, G. A.; Snkhchyan, G. M.; Panosyan, G. A.; *Chem. Heterocyclic Compounds*, **2005**, *41*, 437.

**(*R*)-2,2'-(4-phenylbutane-1,2-diyl)difuran [(*R*)-2u]**

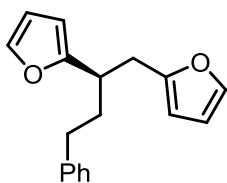

**(*R*)-2u** was synthesised through a modification of the **GP2** procedure. A solution of furan (21  $\mu$ L, 0.28 mmol, 2.2 eq.) in THF (0.3 M) was cooled to 0  $^{\circ}$ C and treated with *n*-BuLi (0.2 mL, 0.28 mmol, 2.2 eq., 1.6 M in hexanes). The mixture was stirred at this temperature for 1 h and the boronic ester (***R*-1u**) (50 mg, 0.13 mmol, 1.0 eq.) was added dropwise as a solution in THF (0.5 M). The mixture was stirred at 0  $^{\circ}$ C for 1 h at which point  $^{11}\text{B}$  NMR spectroscopy showed complete formation of the 'ate' complex [ $^{11}\text{B}$  NMR (96 MHz, THF)  $\delta_{\text{B}} \sim 8$  ppm]. A solution of *N*-bromosuccinimide (NBS, 57.4 mg, 0.32 mmol, 2.5 eq.) in anhydrous MeOH (0.2 M) was added dropwise. A suspension of NaOMe (17 mg, 0.32 mmol, 2.65 eq.) in anhydrous MeOH (0.2 M) was added 1 min. after NBS addition. After 1 h at 0  $^{\circ}$ C, a saturated aqueous solution of  $\text{Na}_2\text{S}_2\text{O}_3$  was added and the reaction mixture was allowed to warm to room temperature. The reaction mixture was diluted with  $\text{Et}_2\text{O}$  (15 mL) and water (15 mL). The layers were separated and the aqueous layer was extracted with  $\text{Et}_2\text{O}$  (2 x 15 mL). The combined organic layers were dried over  $\text{MgSO}_4$ , filtered and concentrated under vacuum. The crude material was adsorbed on silica and purified by flash column chromatography on silica gel eluting with *n*-pentane to give (***R*-2u**) (20 mg, 58%) as an oil; er (*R*:*S*) 97.3;  $R_f$  0.89 (pentane: $\text{Et}_2\text{O}$ : 95:5);  $[\alpha]_{\text{D}}^{23} +13.0$  (*c* 0.6,  $\text{CHCl}_3$ ); IR (film):  $\nu$  ( $\text{cm}^{-1}$ ) 3027, 2926, 1506, 1147, 1008, 725.  $^1\text{H}$  NMR (400 MHz,  $\text{CDCl}_3$ )  $\delta$  ppm; 7.36 (dd,  $J = 1.8, 0.8$  Hz, 1H), 7.28 (dd,  $J = 1.8, 0.8$  Hz, 1H), 7.28–7.24 (m, 2H), 7.18 (m, 1H), 7.15–7.11 (m, 2H), 6.30 (dd,  $J = 3.2, 1.8$  Hz, 1H), 6.24 (dd,  $J = 3.1, 1.8$  Hz, 1H), 6.02 (br d,  $J = 3.2$  Hz, 1H), 5.88 (dd,  $J = 3.1, 0.8$  Hz, 1H), 3.13 (m, 1H), 3.02 (dd,  $J = 14.9, 7.2$  Hz, 1H), 2.93 (dd,  $J = 14.9, 7.2$  Hz, 1H), 2.59 (dq,  $J = 9.4, 5.9$  Hz, 1H), 2.51 (dq,  $J = 9.4, 5.9$  Hz, 1H), 2.07–1.89 (m, 2H);  $^{13}\text{C}$  NMR (100 MHz,  $\text{CDCl}_3$ )  $\delta$  ppm 157.4, 153.8, 142.0, 141.0, 140.9, 128.4, 128.3, 125.7, 110.1, 109.9, 106.2, 105.5, 37.9, 35.0, 33.3, 32.8; HRMS (EI) calcd. for  $\text{C}_{18}\text{H}_{18}\text{O}_2$  [ $M$ ] $^+$  266.1307, found 266.1303.

Resolution of the enantiomers of **2u** was achieved using a chiral SFC system fitted with a Chiracel IB column as the stationary phase with  $\text{CO}_2$ : $[n$ -hexane] as the mobile phase at a flow rate of 4.0 mL  $\text{min}^{-1}$  ( $P = 125$  bar). Injection volume: 20  $\mu$ L of a 2 g  $\text{L}^{-1}$  solution of compound in the eluent. Under these conditions, the faster running component (*S*) and the slower running component (*R*) were eluted at 2.6 and 3.0 min., respectively, with a total analysis time of 15 min.



**(*R*)-tert-Butyl 4-(furan-3-yl)-6-phenylhexanoate [(*R*)-3e]**

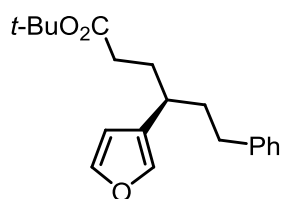

A solution of 3-bromofuran (29  $\mu\text{L}$ , 0.32 mmol, 1.2 eq.) in THF (1.0 mL) was cooled to  $-78\text{ }^\circ\text{C}$  and treated with *n*-BuLi (0.2 mL, 0.32 mmol, 1.2 eq., 1.6 M in hexanes). The mixture was stirred at  $-78\text{ }^\circ\text{C}$  for 1 h. (*R*)-**1e** (90 mg, 0.25 mmol, 1.0 eq.) was added as a solution in THF (0.5 mL) and the reaction was stirred at the same temperature for 1 h at which point  $^{11}\text{B}$  NMR spectroscopy showed complete formation of the boron-ate complex [ $^{11}\text{B}$  NMR, 96 MHz, THF)  $\delta_{\text{B}} \sim 8$  ppm]. A solution of NBS (53 mg, 0.32 mmol, 1.2 eq.) in THF (1.0 mL) was added dropwise. After 1 h at  $-78\text{ }^\circ\text{C}$ , saturated aqueous solution of  $\text{Na}_2\text{S}_2\text{O}_3$  (2 mL) was added and the reaction mixture was allowed to warm to r.t. The reaction mixture was diluted with  $\text{Et}_2\text{O}$  (5 mL) and water (5 mL). The layers were separated and the aqueous layer was extracted with  $\text{Et}_2\text{O}$  (2 x 5 mL). The combined organic layers were dried over  $\text{MgSO}_4$ , filtered and concentrated under vacuum. The crude material was adsorbed on silica and purified by flash column chromatography on silica gel eluting with *n*-hexane to give (*R*)-**3e** (65 mg, 85%) as an oil; er (*R*:*S*) 96:4;  $R_f$  0.44 (*n*-hexane: $\text{Et}_2\text{O}$  95:5);  $[\alpha]_{\text{D}}^{24} +0.1$  (*c* 0.5,  $\text{CHCl}_3$ ); IR (film):  $\nu$  ( $\text{cm}^{-1}$ ) 2923, 2855, 1728, 1454, 1367, 1146, 1028, 874, 699;  $^1\text{H}$  NMR (400 MHz,  $\text{CDCl}_3$ )  $\delta$  ppm 7.41 (t,  $J = 1.7$  Hz, 1H), 7.30–7.23 (m, 3H), 7.21–7.10 (m, 3H), 6.29 (s, 1H), 2.66–2.42 (m, 3H), 2.22–2.02 (m, 2H), 1.98–1.63 (m, 4H), 1.41 (s, 9H);  $^{13}\text{C}$  NMR (100 MHz,  $\text{CDCl}_3$ )  $\delta$  ppm 173.0, 143.12, 142.2, 139.4, 128.4, 128.3, 127.4, 125.7, 108.9, 80, 37.6, 34.8, 33.5, 33.4, 31.2, 29.6, 28.0; HRMS (EI)  $\text{C}_{20}\text{H}_{26}\text{O}_3$  [ $M$ ] $^+$  calcd. 314.1882, found 314.1875

Resolution of the enantiomers of **3e** was achieved using a chiral SFC system fitted with a Chiracel IB column as the stationary phase with  $\text{CO}_2$ :*n*-hexane (4:1, v:v) as the mobile phase at a flow rate of  $4.0\text{ mL min}^{-1}$  ( $P = 125$  bar). Injection volume:  $20\mu\text{L}$  of  $2\text{ g L}^{-1}$  solution of compound in the eluent. Under these conditions, the faster running component (*S*) and the slower running component (*R*) were eluted at 3.9 and 4.6 min., respectively, with a total analysis time of 15 min.

**(*R*)-tert-Butyl 4-(benzofuran-2-yl)-6-phenylhexanoate [(*R*)-4e]**

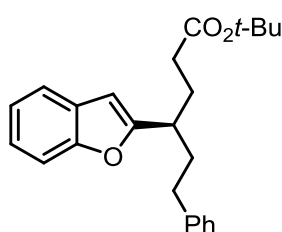

A solution of benzofuran (35  $\mu\text{L}$ , 0.32 mmol, 1.2 eq.) in THF (1.0 mL) was cooled to  $-78\text{ }^\circ\text{C}$  and treated with *n*-BuLi (0.2 mL, 0.32 mmol, 1.2 eq., 1.6 M in hexanes). The mixture was warmed to r.t. and stirred for 1 h. The mixture was cooled to  $-78\text{ }^\circ\text{C}$  and (*R*)-**1e** (90 mg,

0.25 mmol, 1.0 eq.) was added as a solution in THF (0.5 mL) and the reaction was stirred at the same temperature for 1 h at which point  $^{11}\text{B}$  NMR spectroscopy showed complete formation of the 'ate' complex [ $^{11}\text{B}$  NMR, 96 MHz, THF)  $\delta_{\text{B}} \sim 8$  ppm]. A solution of NBS (53 mg, 0.32 mmol, 1.2 eq.) in THF (1.0 mL) was added dropwise. After 1 h at  $-78$  °C, saturated aqueous solution of  $\text{Na}_2\text{S}_2\text{O}_3$  (2 mL) was added and the reaction mixture was allowed to warm to r.t. The reaction mixture was diluted with  $\text{Et}_2\text{O}$  (5 mL) and water (5 mL). The layers were separated and the aqueous layer was extracted with  $\text{Et}_2\text{O}$  (2 x 5 mL). The combined organic layers were dried over  $\text{MgSO}_4$ , filtered and concentrated under vacuum. The crude material was adsorbed on silica and purified by flash column chromatography on silica gel eluting with *n*-hexane to give (*R*)-**4e** (65 mg, 66%) as an oil; er (*R*:*S*) 96:4;  $R_{\text{f}}$  0.29 (*n*-hexane: $\text{Et}_2\text{O}$  95:5);  $[\alpha]_{\text{D}}^{23} +13.4$  (*c* 1.0,  $\text{CHCl}_3$ ); IR (film):  $\nu$  ( $\text{cm}^{-1}$ ) 2979, 2952, 2933, 1727, 1452, 1248, 1142, 849, 745;  $^1\text{H}$  NMR (400 MHz,  $\text{CDCl}_3$ )  $\delta$  ppm 7.52 (br d,  $J = 7.3$  Hz, 1H), 7.45 (dt,  $J = 3.3$  Hz, 1H), 7.31–7.12 (m, 7H), 6.45 (m, 1H), 2.87 (m, 1H), 2.69–2.49 (m, 2H), 2.25–1.90 (m, 6H), 1.40 (s, 9H);  $^{13}\text{C}$  NMR (100 MHz,  $\text{CDCl}_3$ )  $\delta$  ppm 172.7, 160.4, 154.7, 141.8, 128.4, 128.3, 125.8, 123.2, 122.4, 120.3, 110.9, 103.2, 80.2, 38.4, 35.5, 33.5, 33.2, 29.2, 28.0; HRMS (EI)  $\text{C}_{24}\text{H}_{28}\text{O}_3$  [ $M$ ] $^+$  calcd. 364.2038, found 364.2040.

Resolution of the enantiomers of **4e** was achieved using a chiral SFC system fitted with a Chiracel IB column as the stationary phase with  $\text{CO}_2$ : [*n*-hexane:*i*-PrOH (1:1 v:v)] (4:1 v:v) as the mobile phase at a flow rate of  $4.0 \text{ mL min}^{-1}$  ( $P = 125$  bar). Injection volume:  $20 \mu\text{L}$  of a  $2 \text{ g L}^{-1}$  solution of compound in the eluent. Under these conditions, the faster running component (*S*) and the slower running component (*R*) were eluted at 4.5 and 5.3 min., respectively, with a total analysis time of 15 min.

#### (*R*)-2-(4-(4-methoxyphenyl)butan-2-yl)-1-methyl-1H-pyrrole [(*R*)-**5b**]

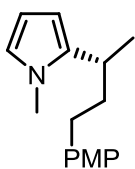

A solution of 1-methylpyrrole ( $23 \mu\text{L}$ , 0.26 mmol, 1.5 eq.) in THF (2.0 mL) was cooled to  $-78$  °C and treated with *s*-BuLi (0.2 mL, 0.26 mmol, 1.5 eq., 1.3 M in cyclohexane/hexane (92/8)). The mixture was stirred at  $-78$  °C for 5 min. and then it was allowed to warm to r.t. After 40 min. a solution of (*R*)-**1b** (50 mg, 0.17 mmol, 1.0 eq.) in THF (1.0 mL) was added. The mixture was stirred at  $-78$  °C for 1 h at which point  $^{11}\text{B}$  NMR spectroscopy showed complete formation of the 'ate' complex [ $^{11}\text{B}$  NMR, 96 MHz, THF)  $\delta_{\text{B}} \sim 8$  ppm]. A solution of NIS (46 mg, 0.21 mmol, 1.2 eq.) in THF (2.0 mL) was added dropwise. After 1 h at  $-78$  °C, saturated aqueous solution of  $\text{Na}_2\text{S}_2\text{O}_3$  (2 mL) was added and the reaction mixture was allowed to warm to room temperature. The

reaction mixture was diluted with EtOAc (10 mL) and water (5 mL). The layers were separated and the aqueous layer was extracted with EtOAc (2 x 10 mL). The combined organic layers were dried over MgSO<sub>4</sub>, filtered and concentrated under vacuum. The crude material was adsorbed on silica and purified by flash column chromatography on silica gel eluting with *n*-hexane to give (*R*)-**5b** (20 mg, 47%) as an oil; er (*R*:*S*) 95:5; *R*<sub>f</sub> 0.25 (petrol:Et<sub>2</sub>O 95:5); [ $\alpha$ ]<sub>D</sub><sup>21</sup> 2.7 (*c* 0.37, CHCl<sub>3</sub>); IR (film):  $\nu$  (cm<sup>-1</sup>) 2957, 2930, 1698, 1511, 1298, 1242, 1034, 700; <sup>1</sup>H NMR (400 MHz, CDCl<sub>3</sub>)  $\delta$  ppm 7.11–7.05 (m, 2H), 6.85–6.81 (m, 2H), 6.52 (m, 1H), 6.10 (m, 1H), 5.93 (dd, *J* = 3.5, 1.8 Hz, 1H), 3.80 (s, 3H), 3.48 (s, 3H), 2.75 (sx, *J* = 6.9 Hz, 1H), 2.67–2.53 (m, 2H), 1.95 (qid, *J* = 8.8, 6.9 Hz, 1H), 1.81 (qid, *J* = 8.8, 6.9 Hz, 1H), 1.26 (d, *J* = 6.9 Hz, 3H); <sup>13</sup>C NMR (100 MHz, CDCl<sub>3</sub>)  $\delta$  ppm 157.7, 138.5, 134.4, 129.2, 120.8, 113.7, 106.5, 103.5, 55.2, 39.0, 33.5, 32.6, 30.0, 21.0; HRMS (EI) calcd. for C<sub>16</sub>H<sub>21</sub>NO [*M*]<sup>+</sup> 243.1623, found 243.1619.

Resolution of the enantiomers of **5b** was achieved using a chiral HPLC system fitted with a Chiralpak IB column with guard as the stationary phase with *n*-hexane as the mobile phase at a flow rate of 0.5 mL min<sup>-1</sup> (*T* = 0 °C). Injection volume: 5  $\mu$ L of the sample prepared in a 2 g L<sup>-1</sup> solution of compound in the eluent. Under these conditions, the faster running component (*R*) and the slower running component (*S*) were eluted at 41.5 and 48.5 min., respectively, with a total analysis time of 60 min.

#### (*R*)-1-Methyl-2-(4-phenylbutan-2-yl)-1H-indole [(*R*)-**6a**]

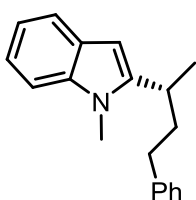

A solution of *N*-methylindole (50  $\mu$ L, 0.40 mmol, 1.6 eq.) in THF (1.0 mL) was treated with BuLi (0.3 mL, 0.40 mmol, 1.6 eq., 1.6 M in hexanes) at r.t. The mixture was heated under refluxing conditions for 3 h. The mixture was gradually cooled to -78 °C and (*R*)-**1a** (65 mg, 0.25 mmol, 1.0 eq.) was added dropwise as a solution in THF (1.0 mL). The mixture was stirred at -78 °C for 1 h at which point <sup>11</sup>B NMR spectroscopy showed complete formation of the 'ate' complex [<sup>11</sup>B NMR, 96 MHz, THF)  $\delta_B$  ~ 8 ppm]. A solution of NIS (68 mg, 0.30 mmol, 1.2 eq.) in THF (1.0 mL) was added dropwise. After 1 h saturated aqueous solution of Na<sub>2</sub>S<sub>2</sub>O<sub>3</sub> (2 mL) was added. After 2 min. the reaction mixture was allowed to warm to r.t. The reaction mixture was diluted with EtOAc (10 mL) and washed with water (15 mL). The aqueous layer was extracted with EtOAc (2 x 15 mL). The combined organic layers were dried over MgSO<sub>4</sub>, filtered and concentrated under vacuum. Purification by flash column chromatography eluting with *n*-hexane:Et<sub>2</sub>O (99:1) gave (*R*)-**6a** (57 mg, 86%) as an oil; er (*R*:*S*) 98:2; *R*<sub>f</sub> 0.82 (petrol:EtOAc 95:5); [ $\alpha$ ]<sub>D</sub><sup>22</sup> - 54.3 (*c* 1.0, CHCl<sub>3</sub>); IR (film):  $\nu$  (cm<sup>-1</sup>) 3056, 3025, 2962,

2926, 2859, 1539, 1466, 1454, 1309, 1011, 774, 746, 730, 698;  $^1\text{H}$  NMR (400 MHz,  $\text{CDCl}_3$ )  $\delta$  ppm 7.63 (br d,  $J = 7.73$  Hz, 1H), 7.38–7.31 (m, 3H), 7.28–7.19 (m, 4H), 7.15 (td,  $J = 7.3$ , 1.1 Hz, 1H), 6.38 (s, 1H), 3.65 (s, 3H), 3.01 (app. sx,  $J = 6.9$  Hz, 1H), 2.76 (t,  $J = 7.9$  Hz, 2H), 2.18 (dq,  $J = 13.7$ , 7.5 Hz, 1H), 2.00 (dq,  $J = 14.2$ , 7.9 Hz, 1H), 1.42 (d,  $J = 6.9$  Hz, 3H);  $^{13}\text{C}$  NMR (100 MHz,  $\text{CDCl}_3$ )  $\delta$  ppm 146.2, 142.1, 137.3, 128.5, 128.4, 128.0, 125.9, 120.6, 119.9, 119.3, 108.9, 97.0, 38.5, 33.5, 30.4, 29.4, 21.0; HRMS (EI) calcd. for  $\text{C}_{19}\text{H}_{21}\text{N}$   $[M]^+$  263.1674, found 263.1674.

Resolution of the enantiomers of **6a** was achieved using a chiral SFC system fitted with a Chiracel IB column as the stationary phase with  $\text{CO}_2$ : $[n$ -hexane: $i$ -PrOH (1:1 v:v)] (9:1 v:v) as the mobile phase at a flow rate of  $4.0 \text{ mL min}^{-1}$  ( $P = 125$  bar). Injection volume:  $20 \mu\text{L}$  of a  $2 \text{ g L}^{-1}$  solution of compound in the eluent. Under these conditions, the faster running component ( $S$ ) and the slower running component ( $R$ ) were eluted at 6.9 and 7.5 min., respectively, with a total analysis time of 15 min.

**2-((3*S*,5*R*,6*S*,8*S*,9*S*,10*R*,13*R*,14*S*,17*R*)-3-((*tert*-Butyldimethylsilyl)oxy)-10,13-dimethyl-17-((*R*)-6-methylheptan-2-yl)hexadecahydro-1*H*-cyclopenta[ $\alpha$ ]phenanthren-6-yl)-1-methyl-1*H*-indole (**6p**)**

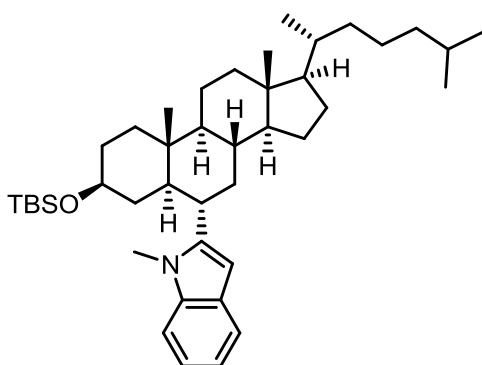

$n$ -BuLi (0.3 mL, 0.48 mmol, 3.0 eq., 1.6 M in hexanes) was added at r.t. to a stirred solution of  $N$ -methylindole (60  $\mu\text{L}$ , 0.48 mmol, 3.0 eq.) in THF (1.0 mL). The mixture was heated under refluxing conditions for 3 h. The reaction mixture was cooled to  $-78$   $^\circ\text{C}$  and **1p** (100 mg, 0.16 mmol, 1.0 eq.) was added dropwise as a solution in THF (1.0 mL). The

mixture was stirred at  $-78$   $^\circ\text{C}$  for 1 h at which point  $^{11}\text{B}$  NMR spectroscopy showed complete formation of the boron-ate complex [ $^{11}\text{B}$  NMR, 96 MHz)  $\delta_{\text{B}} \sim 8$  ppm]. MeOH (0.5 mL) was added at  $-78$   $^\circ\text{C}$  to quench the excess organolithium. A solution of NIS (43 mg, 0.19 mmol, 1.2 eq.) in THF (1.0 mL) was added dropwise. After 18 h saturated aqueous solution of  $\text{Na}_2\text{S}_2\text{O}_3$  (2 mL) was added. After 2 min. the reaction mixture was allowed to warm up to r.t. The reaction mixture was diluted with EtOAc (10 mL) and washed with water (15 mL). The aqueous layer was extracted with EtOAc (2 x 15 mL), the combined organic layers were dried ( $\text{MgSO}_4$ ), filtered and concentrated under vacuum. Purification by flash column chromatography eluting with  $n$ -hexane:Et $_2$ O (99.5:0.5) gave **6p** (75 mg, 75%) as a

solid;  $R_f$  0.30 (petrol:Et<sub>2</sub>O 99:1); mp 194–196 °C;  $[\alpha]_D^{22} + 30.4$  ( $c$  0.9, CHCl<sub>3</sub>); IR (film):  $\nu$  (cm<sup>-1</sup>) 2927, 2851, 1467, 1444, 1248, 1099, 1084, 867, 834, 768, 749, 728; <sup>1</sup>H NMR (400 MHz, CDCl<sub>3</sub>)  $\delta$  ppm 7.53 (br d,  $J = 7.8$  Hz, 1H), 7.27 (m, 1H), 7.14 (m, 1H), 7.04 (m, 1H), 6.20 (s, 1H), 3.67 (s, 3H), 3.44 (m, 1H), 2.74 (td,  $J = 11.6, 3.6$  Hz, 1H), 2.06–1.99 (dt,  $J = 12.6, 3.2$  Hz, 1H), 1.93–1.86 (dt,  $J = 13.2, 3.9$  Hz, 1H), 1.84–1.74 (m, 2H), 1.72–1.67 (m, 1H), 1.60–1.54 (m, 2H), 1.54–1.50 (m, 2H), 1.49–1.47 (m, 1H), 1.46–1.43 (m, 1H), 1.39–1.32 (m, 4H), 1.27 (s, 3H), 1.19–1.16 (m, 1H), 1.15–1.09 (m, 4H), 1.07–1.02 (m, 3H), 1.0–0.99 (m, 4H), 0.92 (d,  $J = 6.5$  Hz, 3H), 0.87 (dd,  $J = 6.6, 1.8$  Hz, 8H), 0.74 (s, 9H), 0.70 (s, 3H), –0.09 (s, 3H), –0.13 (s, 3H); <sup>13</sup>C NMR (100 MHz, CDCl<sub>3</sub>)  $\delta$  ppm 145.7, 136.6, 128.2, 120.2, 119.6, 119.1, 108.8, 96.8, 72.3, 56.2, 54.2, 50.9, 42.6, 40.7, 40.0, 39.5, 37.3, 36.2, 36.2, 35.8, 35.4, 35.1, 34.8, 31.8, 29.7, 29.5, 28.2, 28.0, 25.8, 24.1, 23.8, 22.8, 22.6, 21.3, 18.7, 18.2, 13.2, 12.1, –4.7; HRMS (ESI) calcd. for C<sub>42</sub>H<sub>70</sub>NOSi  $[M+H]^+$  632.5221, found 632.5227.

### 2-((1*R*,2*S*,5*R*)-2-isopropyl-5-methylcyclohexyl)-1-methyl-1*H*-indole (**6q**)

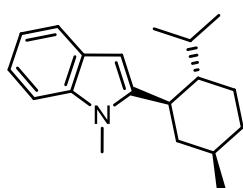

A solution of *N*-methylindole (75  $\mu$ L, 0.60 mmol, 1.6 eq.) in THF (1.0 mL) was treated with *n*-BuLi (0.4 mL, 0.60 mmol, 1.6 eq., 1.6 M in hexanes) at r.t. The mixture was heated under refluxing conditions for 3 h. The mixture was cooled to –78 °C and **1q** (100 mg, 0.38 mmol, 1.0 eq.) was added dropwise as a solution in THF (2.0 mL). The mixture was stirred at –78 °C for 1 h at which point <sup>11</sup>B NMR spectroscopy showed complete formation of the ‘ate’ complex [<sup>11</sup>B NMR, 96 MHz, THF)  $\delta_B \sim 8$  ppm]. A solution of NIS (135 mg, 0.60 mmol, 1.2 eq.) in THF (2.0 mL) was added dropwise. After 1 h saturated aqueous solution of Na<sub>2</sub>S<sub>2</sub>O<sub>3</sub> (2 mL) was added. After 2 min. the reaction mixture was allowed to warm to r.t. The reaction mixture was diluted with EtOAc (10 mL) and washed with water (15 mL). The aqueous layer was extracted with EtOAc (2 x 15 mL). The combined organic layers were dried over MgSO<sub>4</sub>, filtered and concentrated under vacuum. Purification by flash column chromatography eluting with *n*-hexane:Et<sub>2</sub>O (99:1) gave **6q** (66 mg, 65%) as an oil;  $R_f$  0.40 (pentane:Et<sub>2</sub>O 99:1);  $[\alpha]_D^{23} - 105$  ( $c$  1, CHCl<sub>3</sub>); IR (film):  $\nu$  (cm<sup>-1</sup>) 3677, 3056, 2951, 2918, 2867, 1543, 1466, 1409, 1384, 1367, 1342, 1308, 1265, 1226, 1170, 1143, 1129, 1114, 1097, 1081, 1054, 1013, 977, 939, 916, 904, 870, 833, 775, 746, 729, 688, 672, 589, 569, 535, 525; <sup>1</sup>H NMR (400 MHz, CDCl<sub>3</sub>)  $\delta$  ppm 7.61 (d,  $J = 7.7$  Hz, 1H), 7.35 (d,  $J = 8.0$  Hz, 1H), 7.22 (t,  $J = 7.7$  Hz, 1H), 7.14 (t,  $J = 7.7$  Hz, 1H), 6.30 (s, 1H), 3.77 (s, 3H), 2.75 (br t,  $J = 11.5$  Hz,

1H), 1.99–1.83 (m, 4H), 1.68 (d,  $J = 11.9$  Hz, 1H), 1.56 (m, 1H), 1.32–1.04 (m, 3H) 0.95 (d,  $J = 6.5$  Hz, 3H), 0.89 (d,  $J = 7.0$  Hz, 3H), 0.72 (d,  $J = 6.9$  Hz, 3H);  $^{13}\text{C}$  NMR (100 MHz,  $\text{CDCl}_3$ )  $\delta$  ppm 146.0, 136.6, 128.2, 120.1, 119.6, 119.2, 108.8, 96.8, 47.3, 45.0, 38.4, 35.0, 33.1, 29.3, 27.3, 24.6, 22.4, 21.7, 15.8; HRMS (ESI) calcd. for  $\text{C}_{19}\text{H}_{28}\text{N}$   $[M+\text{H}]^+$  270.2216, found 270.2215.

### **(*R*)-2-(4-Phenylbutan-2-yl)thiophene [(*R*)-7a]**

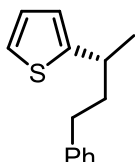

A solution of thiophene (48  $\mu\text{L}$ , 0.60 mmol, 1.2 eq.) in THF (2.0 mL) was cooled to  $-78$   $^\circ\text{C}$  and treated with *n*-BuLi (0.4 mL, 0.60 mmol, 1.2 eq., 1.6 M in hexanes). The mixture was warmed to  $0$   $^\circ\text{C}$  and stirred for 30 min. The mixture was cooled to  $-78$   $^\circ\text{C}$  and the (*R*)-**1a** (130 mg, 0.50 mmol, 1.0 eq.) was added dropwise as a solution in THF (1.0 mL). The mixture was stirred at  $-78$   $^\circ\text{C}$  for 1 h at which point  $^{11}\text{B}$  NMR spectroscopy showed complete formation of the ‘ate’ complex [ $^{11}\text{B}$  NMR (96 MHz, THF)  $\delta_{\text{B}} \sim 8$  ppm]. A solution of NBS (107 mg, 0.60 mmol, 1.2 eq.) in THF (2.0 mL) was added dropwise. After 1 h saturated aqueous solution of  $\text{Na}_2\text{S}_2\text{O}_3$  (2 mL) was added and the reaction mixture was allowed to warm to room temperature. The reaction mixture was diluted with EtOAc (10 mL) and water (5 mL). The layers were separated and the aqueous layer was extracted with EtOAc (2 x 10 mL). The combined organic layers were dried over  $\text{MgSO}_4$ , filtered and concentrated under vacuum. The crude material was adsorbed on silica and purified by flash column chromatography on silica gel eluting with *n*-hexane to give (*R*)-**7a** (100 mg, 92 %) as an oil; er (*R*:*S*) 98:2;  $R_f$  0.47 (*n*-hexane);  $[\alpha]_{\text{D}}^{24} - 25.0$  ( $c$  1.0,  $\text{CHCl}_3$ ); IR (film):  $\nu$  ( $\text{cm}^{-1}$ ) 3062, 3026, 2958, 2923, 2856, 1603, 1496, 1453, 1030, 849, 746;  $^1\text{H}$  NMR (400 MHz,  $\text{CDCl}_3$ )  $\delta$  ppm 7.38–7.32 (m, 2H), 7.29–7.23 (m, 3H), 7.22 (dd,  $J = 5.1, 1.2$  Hz, 1H), 7.02 (dd,  $J = 5.1, 3.5$  Hz, 1H), 6.92–6.89 (br d,  $J = 3.5$  Hz, 1H), 3.15 (app. sx,  $J = 6.9$  Hz, 1H), 2.68 (t,  $J = 8.3$  Hz, 2H), 2.12–1.96 (m, 2H), 1.44 (d,  $J = 6.9$  Hz, 3H);  $^{13}\text{C}$  NMR (100 MHz,  $\text{CDCl}_3$ )  $\delta$  ppm 151.6, 142.3, 128.5, 128.4, 126.5, 125.8, 122.8, 122.5, 41.0, 34.9, 33.7, 23.5; HRMS (EI) calcd. for  $\text{C}_{14}\text{H}_{16}\text{S}$   $[M]^+$  216.0973, found 216.0972.

Resolution of the enantiomers of **7a** was achieved using a chiral HPLC system fitted with a Chiracel OD column with guard as the stationary phase with *n*-hexane as the mobile phase at a flow rate of  $0.3$   $\text{mL min}^{-1}$  ( $T = 0$   $^\circ\text{C}$ ). Injection volume:  $20\mu\text{L}$  of a  $2$   $\text{g L}^{-1}$  solution of compound in the eluent. Under these conditions, the faster running component (*S*) and the slower running component (*R*) were eluted at 76.8 and 85.8 min., respectively, with a total analysis time of 100 min.

## 2-((1*R*,2*S*,5*R*)-2-isopropyl-5-methylcyclohexyl)thiophene (**7q**)

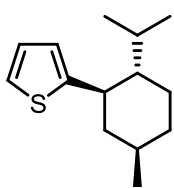

A solution of thiophene (36  $\mu\text{L}$ , 0.45 mmol, 1.2 eq.) in THF (2.0 mL) was cooled to  $-78\text{ }^\circ\text{C}$  and treated with *n*-BuLi (0.3 mL, 0.45 mmol, 1.2 eq., 1.6 M in hexanes). The mixture was warmed to  $0\text{ }^\circ\text{C}$  and stirred for 30 min. The mixture was cooled to  $-78\text{ }^\circ\text{C}$  and the **1q** (100 mg, 0.38 mmol, 1.0 eq.) was added dropwise as a solution in THF (1.0 mL). The mixture was stirred at  $-78\text{ }^\circ\text{C}$  for 1 h at which point  $^{11}\text{B}$  NMR spectroscopy showed complete formation of the 'ate' complex [ $^{11}\text{B}$  NMR (96 MHz, THF)  $\delta_{\text{B}} \sim 8$  ppm]. A solution of NBS (81 mg, 0.45 mmol, 1.2 eq.) in THF (2.0 mL) was added dropwise. After 1 h at  $-78\text{ }^\circ\text{C}$ , saturated aqueous solution of  $\text{Na}_2\text{S}_2\text{O}_3$  (2 mL) was added and the reaction mixture was allowed to warm to r.t. The reaction mixture was diluted with EtOAc (10 mL) and water (5 mL). The layers were separated and the aqueous layer was extracted with EtOAc (2 x 10 mL). The combined organic layers were dried over  $\text{MgSO}_4$ , filtered and concentrated under vacuum. The crude material was adsorbed on silica and purified by flash column chromatography on silica gel eluting with *n*-hexane to give **7q** (54 mg, 65%) as an oil;  $R_f$  0.87 (pentane:Et<sub>2</sub>O 99:1);  $[\alpha]_{\text{D}}^{23} - 38$  (*c* 1,  $\text{CHCl}_3$ ); IR (film):  $\nu$  ( $\text{cm}^{-1}$ ) 3677, 3069, 2953, 2917, 2869, 2846, 1455, 1444, 1385, 1368, 1347, 1312, 1277, 1266, 1239, 1224, 1187, 1131, 1075, 1054, 1038, 997, 975, 929, 861, 845, 819, 772, 750, 688, 607, 586, 532;  $^1\text{H}$  NMR (400 MHz,  $\text{CDCl}_3$ )  $\delta$  ppm 7.12 (br d,  $J = 5.1$  Hz, 1H), 6.91 (dd,  $J = 5.1, 3.4$  Hz, 1H), 6.77 (br d,  $J = 3.4$  Hz, 1H), 2.80 (td,  $J = 11.6, 3.6$  Hz, 1H), 1.95 (dq,  $J = 12.9, 2.8$  Hz, 1H), 1.82 (m, 1H), 1.74 (dq,  $J = 12.8, 3.2$  Hz, 1H), 1.59 (qid,  $J = 6.9, 2.8$  Hz, 1H), 1.48 (m, 1H), 1.34 (tt,  $J = 11.6, 2.8$  Hz, 1H), 1.23 (m, 1H), 1.13 (m, 1H), 1.02 (m, 1H), 0.91 (d,  $J = 6.6$  Hz, 3H), 0.83 (d,  $J = 6.9$  Hz, 3H), 0.72 (d,  $J = 6.9$  Hz, 3H);  $^{13}\text{C}$  NMR (100 MHz,  $\text{CDCl}_3$ )  $\delta$  ppm 150.8, 126.2, 123.0, 122.2, 49.6, 46.5, 43.0, 35.0, 33.9, 27.4, 24.6, 22.4, 21.5, 15.3; HRMS (EI) calcd. for  $\text{C}_{14}\text{H}_{22}\text{S}$  [ $M$ ]<sup>+</sup> 222.1443, found 222.1441.

## (*R*)-2-(4-(4-methoxyphenyl)butan-2-yl)benzo[*b*]thiophene [(*R*)-**8b**]

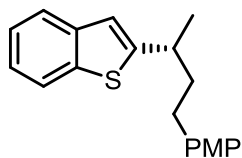

A solution of benzo[*b*]thiophene (35  $\mu\text{L}$ , 0.30 mmol, 1.2 eq.) in THF (2.0 mL) was cooled to  $-78\text{ }^\circ\text{C}$  and treated with *t*-BuLi (0.2 mL, 0.30 mmol, 1.2 eq., 1.6 M in hexane). The mixture was stirred at  $-78\text{ }^\circ\text{C}$  for 1 h and then a solution of (*R*)-**1b** (72 mg, 0.25 mmol, 1.0 eq.) in THF (1.0 mL) was added. The mixture was stirred at  $-78\text{ }^\circ\text{C}$  for 1 h at which point  $^{11}\text{B}$  NMR spectroscopy showed complete formation of the 'ate' complex [ $^{11}\text{B}$  NMR, 96 MHz, THF)  $\delta_{\text{B}} \sim 8$  ppm]. A solution of NBS (53 mg, 0.30 mmol, 1.2 eq.) in THF (2.0 mL) was added dropwise. After 1 h

at  $-78\text{ }^{\circ}\text{C}$ , saturated aqueous solution of  $\text{Na}_2\text{S}_2\text{O}_3$  (2 mL) was added and the reaction mixture was allowed to warm to r.t. The reaction mixture was diluted with EtOAc (10 mL) and water (5 mL). The layers were separated and the aqueous layer was extracted with EtOAc (2 x 10 mL). The combined organic layers were dried over  $\text{MgSO}_4$ , filtered and concentrated under vacuum. The crude material was adsorbed on silica and purified by flash column chromatography on silica gel eluting with *n*-hexane to give (*R*)-**8b** (58 mg, 78%) as an oil; er (*R*:*S*) 96.4;  $R_f$  0.36 (pentane:Et<sub>2</sub>O: 95:5);  $[\alpha]_{\text{D}}^{23}$  38 (*c* 1.0,  $\text{CHCl}_3$ ); mp. 56-58  $^{\circ}\text{C}$ ; IR (film):  $\nu$  ( $\text{cm}^{-1}$ ) 2971, 2927, 1610, 1511, 1431, 1241, 1175, 1035, 819, 743, 726.  $^1\text{H}$  NMR (400 MHz,  $\text{CDCl}_3$ )  $\delta$  ppm; 7.81 (d,  $J = 8.0$  Hz, 1H), 7.70 (d,  $J = 7.7$  Hz, 1H), 7.32 (t,  $J = 7.7$  Hz, 1H), 7.27 (t,  $J = 7.7$  Hz, 1H), 7.09 (d,  $J = 7.7$  Hz, 2H), 7.05 (s, 1H), 6.83 (d,  $J = 7.8$  Hz, 2H), 3.80 (s, 3H), 3.12 (sx,  $J = 6.8$  Hz, 1H), 2.59 (m, 2H), 2.00 (m, 2H), 1.42 (d,  $J = 6.9$  Hz, 3H);  $^{13}\text{C}$  NMR (100 MHz,  $\text{CDCl}_3$ )  $\delta$  ppm 157.7, 152.5, 140.0, 138.9, 134.1, 129.3, 124.0, 123.4, 122.8, 122.3, 119.4, 113.8, 55.3, 40.7, 35.6, 32.6, 23.1; HRMS (EI) calcd. for  $\text{C}_{19}\text{H}_{20}\text{OS}$  [ $M$ ]<sup>+</sup> 296.1235, found 296.1238.

Resolution of the enantiomers of **8b** was achieved using a chiral SFC system fitted with a Chiracel IB column as the stationary phase with  $\text{CO}_2$ : [*n*-hexane:*i*-PrOH (9:1 v:v)] as the mobile phase at a flow rate of  $4.0\text{ mL min}^{-1}$  ( $P = 125$  bar). Injection volume:  $20\text{ }\mu\text{L}$  of a  $2\text{ g L}^{-1}$  solution of compound in the eluent. Under these conditions, the faster running component (*R*) and the slower running component (*S*) were eluted at 15.0 and 17.0 min., respectively, with a total analysis time of 15 min.



## 6. Reaction Products – Coupling of secondary boronic esters to 6-membered aromatics

### (*R*)-1,3-Dimethoxy-5-(4-phenylbutan-2-yl)benzene [(*R*)-**9a**]

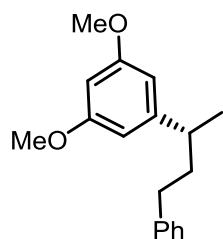

A solution of 3,5-(dimethoxy)bromobenzene (50 mg, 0.23 mmol, 1.2 eq.) in THF (2.5 mL) was cooled to  $-78\text{ }^{\circ}\text{C}$  and treated with *t*-BuLi (0.27 mL, 0.46 mmol, 2.4 eq., 1.7 M in pentane). The mixture was stirred at  $-78\text{ }^{\circ}\text{C}$  for 30 min. and then a solution of (*R*)-**1a** (50 mg, 0.19 mmol, 1.0 eq.) in THF (1.0 mL) was added. The mixture was stirred at  $-78\text{ }^{\circ}\text{C}$  for 1 h at which point  $^{11}\text{B}$  NMR spectroscopy showed complete formation of the ‘ate’ complex [ $^{11}\text{B}$  NMR, 96 MHz, THF)  $\delta_{\text{B}} \sim 8$  ppm]. The mixture was warmed to r.t. and the solvents were removed under high vacuum. The crude was re-dissolved in MeOH (2 mL) and the mixture was cooled to  $-78\text{ }^{\circ}\text{C}$ . A solution of NBS (41 mg, 0.23 mmol, 1.2 eq.) in MeOH (3.0 mL) was added dropwise. After 1 h saturated aqueous solution of  $\text{Na}_2\text{S}_2\text{O}_3$  (2 mL) was added. After 2 min. the reaction mixture was allowed to warm up to r.t. The reaction mixture was diluted with EtOAc (10 mL) and washed with water (15 mL). The aqueous layer was extracted with EtOAc (2 x 15 mL), the combined organic layers were dried over  $\text{MgSO}_4$ , filtered and concentrated under vacuum. Purification by flash column chromatography eluting with *n*-hexane:Et<sub>2</sub>O (98:2) gave (*R*)-**9a** (43 mg, 83%) as an oil, er (*R*:*S*) 98:2;  $R_f$  0.49 (*n*-hexane:Et<sub>2</sub>O 95:5);  $[\alpha]_{\text{D}}^{22} -19.7$  (*c* 1.0,  $\text{CHCl}_3$ ); IR (film):  $\nu$  ( $\text{cm}^{-1}$ ) 2926, 2837, 1593, 1454, 1427, 1203, 1150, 1056, 831, 696;  $^1\text{H}$  NMR (400 MHz,  $\text{CDCl}_3$ )  $\delta$  ppm 7.31–7.25 (m, 2H), 7.22–7.14 (m, 3H), 6.38 (d,  $J = 2.3$  Hz, 2H), 6.32 (t,  $J = 2.3$  Hz, 1H), 3.80 (s, 6H), 2.66 (app. sx,  $J = 6.9$  Hz, 1H), 2.53 (t,  $J = 8.0$ , 2H), 2.00–1.84 (m, 2H), 1.26 (d,  $J = 6.9$  Hz, 3H);  $^{13}\text{C}$  NMR (100 MHz,  $\text{CDCl}_3$ )  $\delta$  ppm 160.8, 149.9, 142.5, 128.4, 128.3, 125.6, 105.3, 97.6, 55.2, 39.9, 39.8, 33.9, 22.4; HRMS (EI) calcd. for  $\text{C}_{18}\text{H}_{22}\text{O}_2$  [ $M$ ]<sup>+</sup> 270.1620, found 270.1625. Resolution of the enantiomers of **9a** was achieved using a chiral SFC system fitted with a Chiracel IA column as the stationary phase with  $\text{CO}_2$ :*n*-hexane (95:5, v:v) as the mobile phase at a flow rate of  $4.0\text{ mL min}^{-1}$  ( $P = 125$  bar). Injection volume:  $20\text{ }\mu\text{L}$  of a  $2\text{ g L}^{-1}$  solution of compound in the eluent. Under these conditions, the faster running component (*S*) and the slower running component (*R*) were eluted at 7.3 and 8.0 min., respectively, with a total analysis time of 15 min.

**(S)-1,3-dimethoxy-5-(1-phenylethyl)benzene [(S)-9I]**

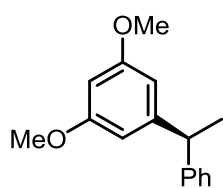

A solution of 3,5-(dimethoxy)bromobenzene (70.5 mg, 0.325 mmol, 1.2 eq.) in THF (2.5 mL) was cooled to  $-78\text{ }^{\circ}\text{C}$  and treated with *t*-BuLi (0.38 mL, 0.65 mmol, 2.4 eq., 1.7 M in pentane). The mixture was stirred at  $-78\text{ }^{\circ}\text{C}$  for 30 min. and then a solution of (S)-**11** (58 mg, 0.25 mmol, 1.0 eq.) in THF (1.0 mL) was added. The mixture was stirred at  $-78\text{ }^{\circ}\text{C}$  for 1 h at which point  $^{11}\text{B}$  NMR spectroscopy showed complete formation of the ‘ate’ complex [ $^{11}\text{B}$  NMR, 96 MHz, THF)  $\delta_{\text{B}} \sim 8$  ppm]. The mixture was warmed to r.t. and the solvents were removed under high vacuum. The crude was re-dissolved in MeOH (2 mL) and the mixture was cooled to  $-78\text{ }^{\circ}\text{C}$ . A solution of NBS (45 mg, 0.25 mmol, 1.0 eq.) in MeOH (3.0 mL) was added dropwise. After 1 h saturated aqueous solution of  $\text{Na}_2\text{S}_2\text{O}_3$  (2 mL) was added. After 2 min. the reaction mixture was allowed to warm to r.t. The reaction mixture was diluted with EtOAc (10 mL) and washed with water (15 mL). The aqueous layer was extracted with EtOAc (2 x 15 mL), the combined organic layers were dried over  $\text{MgSO}_4$ , filtered and concentrated under vacuum. Purification by flash column chromatography eluting with *n*-hexane:Et<sub>2</sub>O (98:2) gave (S)-**9I** (39 mg, 64%) as an oil; er (S:R) 97:3;  $R_f$  0.26 (petrol:Et<sub>2</sub>O 95:5);  $[\alpha]_{\text{D}}^{21}$  0.3 (*c* 0.7,  $\text{CHCl}_3$ ) (lit.  $[\alpha]_{\text{D}}^{20}$   $-2.5$  (*c* 0.4,  $\text{CHCl}_3$ ) for (R)-enantiomer);  $^1\text{H}$  NMR (400 MHz,  $\text{CDCl}_3$ )  $\delta$  ppm; 7.32–7.20 (m, 4H), 7.18 (tt,  $J = 7.0, 1.5$  Hz, 1H), 6.39 (d,  $J = 2.3$  Hz, 2H), 6.30 (t,  $J = 2.3$  Hz, 1H), 4.08 (q,  $J = 7.2$  Hz, 1H), 3.75 (s, 6H), 1.61 (d,  $J = 7.2$  Hz, 3H)  $^{13}\text{C}$  NMR (100 MHz,  $\text{CDCl}_3$ )  $\delta$  ppm 160.7, 148.8, 146.0, 128.3, 127.5, 126.1, 106.0, 97.6, 55.2, 55.2, 45.0, 21.7. Data in accordance with literature.<sup>17</sup>

Resolution of the enantiomers of **9I** was achieved using a chiral HPLC system fitted with a Chiralpak IA column with guard as the stationary phase with *n*-hexanes as the mobile phase at a flow rate of  $1.0\text{ mL min}^{-1}$ . Injection volume:  $2\text{ }\mu\text{L}$  of a  $2\text{ g L}^{-1}$  solution of compound in the eluent. Under these conditions, the faster running component (R) and the slower running component (S) were eluted at 18.5 and 20.3 min., respectively, with a total analysis time of 40 min.

<sup>17</sup> Bess, E. N.; Sigman, M. S.; *Org. Lett.*, **2013**, *15*, 646.

**(3*S*,5*R*,6*S*,8*S*,9*S*,10*R*,13*R*,14*S*,17*R*)-6-(3,5-Dimethoxyphenyl)-10,13-dimethyl-17-((*R*)-6-methylheptan-2-yl)hexadecahydro-1*H*-cyclopenta[*a*]phenanthren-3-ol (**9o**)**

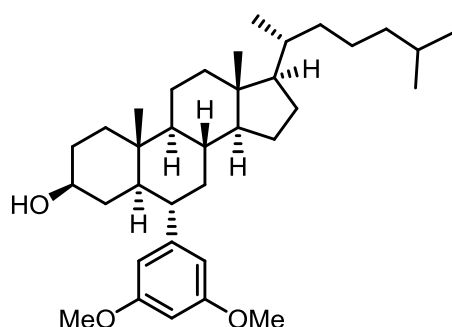

A solution of 3,5-(dimethoxy)bromobenzene (126 mg, 0.58 mmol, 3.0 eq.) in THF (4.0 mL) was cooled to  $-78$  °C and treated with *t*-BuLi (0.5 mL, 0.71 mmol, 2.6 eq., 1.4 M in pentane). The mixture was stirred at  $-78$  °C for 30 min and then a solution of **1o** (100 mg, 0.19 mmol, 1.0 eq.) in THF (2.0 mL) was added. The mixture was stirred at  $-78$  °C for 1 h at which point  $^{11}\text{B}$  NMR spectroscopy showed complete formation of the boron-ate complex [ $^{11}\text{B}$  NMR, 96 MHz)  $\delta_{\text{B}} \sim 8$  ppm]. A solution of NBS (104 mg, 0.58 mmol, 3.0 eq.) in MeOH (3.0 mL) was added dropwise. The mixture was allowed to warm to room temperature overnight and saturated aqueous solution of  $\text{Na}_2\text{S}_2\text{O}_3$  (2 mL) was added. After 2 min. the reaction mixture was allowed to warm to r.t. The reaction mixture was diluted with EtOAc (10 mL) and washed with water (15 mL). The aqueous layer was extracted with EtOAc (2 x 15 mL), the combined organic layers were dried over  $\text{MgSO}_4$ , filtered and concentrated under vacuum. Purification by flash column chromatography (*n*-hexane:EtOAc 9:1 $\rightarrow$ 7:3) gave **9o** (93 mg, 91%) as an amorphous solid;  $R_f$  0.50 (*n*-hexane:EtOAc 7:3); mp. 96–98 °C;  $[\alpha]_{\text{D}}^{22} + 66.9$  (*c* 3.0,  $\text{CHCl}_3$ ); IR (film):  $\nu$  ( $\text{cm}^{-1}$ ) 3364, 2929, 2866, 1594, 1460, 1428, 1204, 1152, 1061, 756, 698.  $^1\text{H}$  NMR (400 MHz,  $\text{CDCl}_3$ )  $\delta$  ppm 6.29 (br s, 3H), 3.78 (s, 6H), 3.44 (tt,  $J = 11.0, 4.8$  Hz, 1H), 2.38 (td,  $J = 12.0, 3.1$  Hz, 1H), 2.01 (br d,  $J = 12.5$  Hz, 1H), 1.86–1.72 (m, 4H), 1.61–1.47 (m, 4H), 1.40–1.29 (m, 6H), 1.28–1.23 (m, 3H), 1.18–1.10 (m, 6H), 1.06–0.99 (m, 5H), 0.94–0.90 (m, 6H), 0.89–0.85 (m, 6H), 0.68 (s, 3H);  $^{13}\text{C}$  NMR (100 MHz,  $\text{CDCl}_3$ )  $\delta$  ppm 148.5, 97.6, 71.5, 56.3, 56.2, 55.2, 54.2, 49.4, 45.1, 42.6, 41.0, 40.0, 39.5, 37.1, 36.2, 36.0, 35.8, 35.3, 34.5, 31.0, 29.7, 28.2, 28.0, 24.1, 23.8, 22.8, 22.6, 21.3, 20.8, 18.7, 17.5, 17.3, 14.6, 13.2, 12.1, 7.9; HRMS (ESI) calcd. for  $\text{C}_{35}\text{H}_{56}\text{NaO}_3$  [ $M+\text{Na}$ ] $^+$  547.4127, found 547.4122.

**1-((1*R*,2*S*,5*R*)-2-isopropyl-5-methylcyclohexyl)-3,5-dimethoxybenzene (**9q**)**

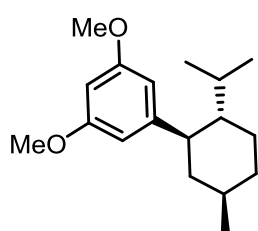

A solution of 3,5-(dimethoxy)bromobenzene (70.5 mg, 0.325 mmol, 1.2 eq.) in THF (2.5 mL) was cooled to  $-78$  °C and treated with *t*-BuLi (0.38 mL, 0.65 mmol, 2.4 eq., 1.7 M in pentane). The mixture was stirred at  $-78$  °C for 30 min. and then a solution of **1q** (67mg, 0.25 mmol, 1.0 eq.) in THF (1.0 mL) was added. The mixture was stirred at  $-78$  °C for 1 h at which point  $^{11}\text{B}$  NMR spectroscopy showed complete formation of the ‘ate’

complex [ $^{11}\text{B}$  NMR, 96 MHz, THF)  $\delta_{\text{B}} \sim 8$  ppm]. The mixture was warmed to r.t. and the solvents were removed under high vacuum. The crude was re-dissolved in MeOH (2 mL) and the mixture was cooled to  $-78$  °C. A solution of NBS (45 mg, 0.25 mmol, 1.0 eq.) in MeOH (3.0 mL) was added dropwise. After 1 h saturated aqueous solution of  $\text{Na}_2\text{S}_2\text{O}_3$  (2 mL) was added. After 2 min. the reaction mixture was allowed to warm up to r.t. The reaction mixture was diluted with EtOAc (10 mL) and washed with water (15 mL). The aqueous layer was extracted with EtOAc (2 x 15 mL), the combined organic layers were dried over  $\text{MgSO}_4$ , filtered and concentrated under vacuum. Purification by flash column chromatography eluting with *n*-hexane: $\text{Et}_2\text{O}$  (98:2) gave **9q** (58 mg, 84%) as an oil;  $R_f$  0.27 (pentane: $\text{Et}_2\text{O}$  99:1);  $[\alpha]_{\text{D}}^{23} - 40$  ( $c$  1,  $\text{CHCl}_3$ ); IR (film):  $\nu$  ( $\text{cm}^{-1}$ ) 3675, 2951, 2914, 2869, 2843, 1593, 1457, 1427, 1384, 1367, 1342, 1311, 1292, 1248, 1220, 1203, 1149, 1060, 993, 981, 954, 940, 930, 913, 877, 828, 698, 604, 570, 539;  $^1\text{H}$  NMR (400 MHz,  $\text{CDCl}_3$ )  $\delta$  ppm; 6.34 (d,  $J = 2.3$  Hz, 2H), 6.29 (t,  $J = 2.3$  Hz, 1H), 3.80 (s, 6H), 2.38 (td,  $J = 11.6, 3.2$  Hz, 1H), 1.85–1.70 (m, 3H), 1.58–1.38 (m, 3H), 1.18–1.07 (dq,  $J = 11.6, 2.5$  Hz, 2H), 1.12 (m, 1H), 0.90 (d,  $J = 6.6$  Hz, 3H), 0.81 (d,  $J = 6.9$  Hz, 3H), 0.70 (d,  $J = 6.9$  Hz, 3H);  $^{13}\text{C}$  NMR (100 MHz,  $\text{CDCl}_3$ )  $\delta$  ppm 160.7, 149.3, 105.6, 97.3, 55.2, 48.4, 47.3, 45.1, 35.3, 33.2, 27.4, 24.5, 22.5, 21.6, 15.5.; HRMS (ESI) calcd. for  $\text{C}_{18}\text{H}_{29}\text{O}_2$   $[M+\text{H}]^+$  277.2168, found 277.2164.

**(*R*)-*N,N*-Dimethyl-3-(4-phenylbutan-2-yl)aniline [(*R*)-10a]**

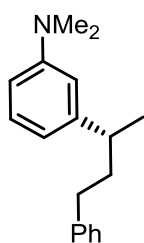

A solution of 3-*N,N*-dimethylaminobromobenzene (43  $\mu\text{L}$ , 0.30 mmol, 1.2 eq.) in THF (2.0 mL) was cooled to  $-78$  °C and treated with *n*-BuLi (0.2 mL, 0.30 mmol, 1.2 eq., 1.6 M in hexanes). The mixture was stirred at  $-78$  °C for 1 h and then a solution of (*R*)-**1a** (65 mg, 0.25 mmol, 1.0 eq.) in THF (1.0 mL) was added. The mixture was stirred at  $-78$  °C for 1 h at which point  $^{11}\text{B}$  NMR spectroscopy showed complete formation of the ‘ate’ complex [ $^{11}\text{B}$  NMR, 96 MHz, THF)  $\delta_{\text{B}} \sim 8$  ppm]. The mixture was warmed to r.t. and the solvents were removed under high vacuum. The crude was re-dissolved in MeOH (2.0 mL) and the mixture was cooled to  $-78$  °C. A solution of NIS (68 mg, 0.30 mmol, 1.2 eq.) in MeOH (3.0 mL) was added dropwise. After 1 h saturated aqueous solution of  $\text{Na}_2\text{S}_2\text{O}_3$  (2 mL) was added. After 2 min. the reaction mixture was allowed to warm to r.t. The reaction mixture was diluted with EtOAc (10 mL) and washed with water (5 mL). The aqueous layer was extracted with EtOAc (2 x 15 mL), the combined organic layers were dried over  $\text{MgSO}_4$ , filtered and concentrated under vacuum. Purification by flash column chromatography eluting with *n*-hexane: $\text{Et}_2\text{O}$  (99:1) gave (*R*)-**10a**

(41 mg, 65 %) as an oil; er (*R:S*) 98:2;  $R_f$  0.60 (petrol:Et<sub>2</sub>O 95:5);  $[\alpha]_D^{20} + 2.0$  ( $c$  1.0, CHCl<sub>3</sub>); IR (film):  $\nu$  (cm<sup>-1</sup>) 3025, 2954, 2922, 2854, 2801, 1601, 1495, 1348, 1348, 994, 773, 746, 696; <sup>1</sup>H NMR (400 MHz, CDCl<sub>3</sub>)  $\delta$  ppm 7.31–7.14 (m, 6H), 6.66–6.61 (m, 3H), 2.97 (s, 6H), 2.70 (app. sx,  $J = 6.9$  Hz, 1H), 2.56 (t,  $J = 8.0$  Hz, 2H), 2.02–1.85 (m, 2H), 1.26 (d,  $J = 6.9$  Hz, 3H); <sup>13</sup>C NMR (100 MHz, CDCl<sub>3</sub>)  $\delta$  ppm 150.6, 148.3, 142.7, 129.1, 128.4, 128.2, 125.6, 115.7, 111.9, 110.6, 40.9, 40.0, 39.9, 34.0, 22.6; HRMS (EI) calcd. for C<sub>18</sub>H<sub>23</sub>N  $[M]^+$  253.1830, found 253.1825.

Resolution of the enantiomers of **10a** was achieved using a chiral SFC system fitted with a Chiracel IB column as the stationary phase with CO<sub>2</sub>:*n*-hexane (9:1 v:v) as the mobile phase at a flow rate of 4.0 mL min<sup>-1</sup> ( $P = 125$  bar). Injection volume: 20  $\mu$ L of a 2 g L<sup>-1</sup> solution of compound in the eluent. Under these conditions, the faster running component (*S*) and the slower running component (*R*) were eluted at 6.5 and 7.2 min., respectively, with a total analysis time of 15 min.

**3-((3*S*,5*R*,6*S*,8*S*,9*S*,10*R*,13*R*,14*S*,17*R*)-3-((*tert*-Butyldimethylsilyl)oxy)-10,13-dimethyl-17-((*R*)-6-methylheptan-2-yl)hexadecahydro-1*H*-cyclopenta[ $\alpha$ ]phenanthren-6-yl)-*N,N*-dimethylaniline (**10p**)**

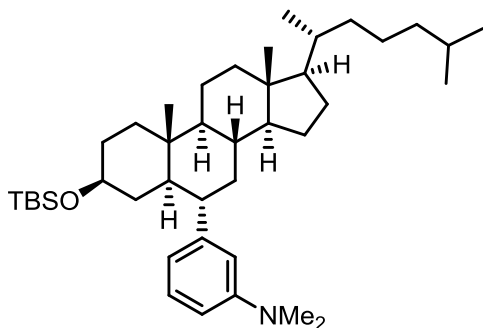

A solution of 3-*N,N*-dimethylaminobromobenzene (27  $\mu$ L, 0.19 mmol, 1.2 eq.) in THF (1.0 mL) was cooled to  $-78$  °C and treated with *n*-BuLi (0.1 mL, 0.19 mmol, 1.2 eq., 1.6 M in hexanes). The mixture was stirred at  $-78$  °C for 1 h and then a solution of **1p** (100 mg, 0.16 mmol, 1.0 eq.) in THF (1.0 mL) was added. The mixture was stirred at  $-78$  °C for 1 h at

which point <sup>11</sup>B NMR spectroscopy showed complete formation of the ‘ate’ complex [<sup>11</sup>B NMR, 96 MHz, THF)  $\delta_B \sim 8$  ppm]. A solution of NIS (43 mg, 0.19 mmol, 1.2 eq.) in MeOH (1.0 mL) was added dropwise. The mixture was allowed to warm to room temperature overnight and saturated aqueous solution of Na<sub>2</sub>S<sub>2</sub>O<sub>3</sub> (2 mL) was added. The reaction mixture was diluted with EtOAc (10 mL) and washed with water (5 mL). The aqueous layer was extracted with EtOAc (2 x 15 mL), the combined organic layers were dried over MgSO<sub>4</sub>, filtered and concentrated under vacuum. Purification by flash column chromatography eluting with *n*-hexane:Et<sub>2</sub>O (98:2) gave **10p** (67 mg, 68%) as an amorphous solid;  $R_f$  0.26 (petrol:Et<sub>2</sub>O 99:1); mp 53–56 °C;  $[\alpha]_D^{22} + 54.3$  ( $c$  2.0, CHCl<sub>3</sub>); IR (film):  $\nu$  (cm<sup>-1</sup>) 2929,

2852, 1601, 1467, 1440, 1250, 1096, 1081, 872, 834, 772, 700;  $^1\text{H}$  NMR (400 MHz,  $\text{CDCl}_3$ )  $\delta$  ppm 7.16 (br s, 1H), 6.60 (br d,  $J = 7.7$  Hz, 1H), 6.52 (br s, 2H), 3.42 (m, 1H, H), 2.94 (s, 6H), 2.38 (br t,  $J = 11.0$  Hz, 1H), 2.02 (br d,  $J = 12.4$  Hz, 1H), 1.87–1.73 (m, 3H), 1.72–1.65 (m, 1H), 1.61–1.46 (m, 4H), 1.42–1.25 (m, 8H), 1.24–1.08 (m, 6H), 1.08–0.98 (m, 6H), 0.98–0.92 (m, 6H), 0.88 (dd,  $J = 6.6, 1.6$  Hz, 7H), 0.79 (s, 9H), 0.70 (s, 3H), –0.08 (s, 3H), –0.10 (s, 3H);  $^{13}\text{C}$  NMR (100 MHz,  $\text{CDCl}_3$ )  $\delta$  ppm 147.0, 128.9, 114.1, 110.2, 72.7, 54.4, 49.5, 45.2, 42.6, 41.6, 41.0, 40.1, 39.5, 37.6, 36.2, 36.0, 35.8, 35.4, 34.8, 31.8, 29.7, 28.3, 28.0, 26.0, 24.2, 23.8, 22.8, 22.6, 21.3, 18.7, 18.3, 13.3, 12.1, –4.6, –4.8; HRMS (ESI) calcd. for  $\text{C}_{41}\text{H}_{72}\text{NOSi}$   $[M+\text{H}]^+$  622.5305, found 622.5386.

### 3-((1*R*,2*S*,5*R*)-2-isopropyl-5-methylcyclohexyl)-*N,N*-dimethylaniline (**10q**)

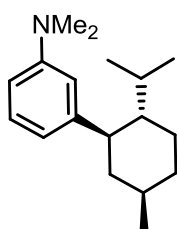

A solution of 3-*N,N*-dimethylaminobromobenzene (43  $\mu\text{L}$ , 0.30 mmol, 1.2 eq.) in THF (2.0 mL) was cooled to  $-78$   $^\circ\text{C}$  and treated with *n*-BuLi (0.2 mL, 0.30 mmol, 1.2 eq., 1.6 M in hexanes). The mixture was stirred at  $-78$   $^\circ\text{C}$  for 1 h and then a solution of **1q** (67 mg, 0.25 mmol, 1.0 eq.) in THF (1.0 mL) was added. The mixture was stirred at  $-78$   $^\circ\text{C}$  for 1 h at which point  $^{11}\text{B}$  NMR spectroscopy showed complete formation of the ‘ate’ complex [ $^{11}\text{B}$  NMR, 96 MHz, THF)  $\delta_{\text{B}} \sim 8$  ppm]. The mixture was warmed to r.t. and the solvents were removed under high vacuum. The crude was re-dissolved in MeOH (2 mL) and the mixture was cooled to  $-78$   $^\circ\text{C}$ . A solution of NIS (68 mg, 0.30 mmol, 1.2 eq.) in MeOH (3.0 mL) was added dropwise. After 1 h saturated aqueous solution of  $\text{Na}_2\text{S}_2\text{O}_3$  (2 mL) was added. After 2 min. the reaction mixture was allowed to warm to r.t. The reaction mixture was diluted with EtOAc (10 mL) and washed with water (5 mL). The aqueous layer was extracted with EtOAc (2 x 15 mL), the combined organic layers were dried over  $\text{MgSO}_4$ , filtered and concentrated under vacuum. Purification by flash column chromatography eluting with *n*-hexane:Et<sub>2</sub>O (99:1) gave **10q** (54 mg, 70%) as an oil;  $R_f$  0.18 (pentane:Et<sub>2</sub>O 99:1);  $[\alpha]_{\text{D}}^{23} - 45$  (c 1,  $\text{CHCl}_3$ ); IR (film):  $\nu$  ( $\text{cm}^{-1}$ ) 2951, 2914, 2869, 2845, 2801, 1684, 1600, 1579, 1500, 1454, 1437, 1383, 1347, 1230, 1177, 1150, 1135, 1098, 1060, 995, 972, 934, 847, 835, 772, 733, 723, 699, 640, 589, 535, 525;  $^1\text{H}$  NMR (400 MHz,  $\text{CDCl}_3$ )  $\delta$  ppm 7.17 (t,  $J = 8.0$  Hz, 1H), 6.63–6.55 (m, 3H), 2.96 (s, 6H), 2.40 (td,  $J = 11.6, 3.4$  Hz, 1H), 1.86–1.78 (m, 2H), 1.78–1.71 (m, 1H), 1.58–1.42 (m, 3H), 1.23–1.09 (m, 2H), 1.02 (m, 1H), 0.91 (d,  $J = 6.5$  Hz, 3H), 0.81 (d,  $J = 6.9$  Hz, 3H), 0.71 (d,  $J = 6.9$  Hz, 3H);  $^{13}\text{C}$  NMR (100 MHz,  $\text{CDCl}_3$ )  $\delta$  ppm 150.7, 147.6, 128.8, 110.2, 48.6,

47.3, 45.4, 40.7, 35.4, 33.3, 27.4, 24.6, 22.6, 21.6, 15.5; HRMS (ESI) calcd. for C<sub>18</sub>H<sub>30</sub>N [M+H]<sup>+</sup> 260.2373, found 260.2383.

**(R)-1-methoxy-3-(4-phenylbutan-2-yl)benzene [(R)-11a]**

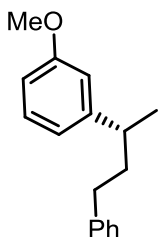

A solution of 3-methoxybromobenzene (29  $\mu$ L, 0.23 mmol, 1.2 eq.) in THF (1.0 mL) was cooled to  $-78$   $^{\circ}$ C and treated with *n*-BuLi (0.15 mL, 0.23 mmol, 1.2 eq., 1.6 M in hexanes). The mixture was stirred at  $-78$   $^{\circ}$ C for 1 h and then a solution of (*R*)-**1a** (50 mg, 0.19 mmol, 1.0 eq.) in THF (1.0 mL) was added. The mixture was stirred at  $-78$   $^{\circ}$ C for 1 h at which point <sup>11</sup>B NMR spectroscopy showed complete formation of the ‘ate’ complex [(<sup>11</sup>B NMR, 96 MHz, THF)  $\delta_B$   $\sim$  8 ppm]. The mixture was warmed to r.t. and the solvents were removed under high vacuum. The crude was re-dissolved in MeOH (2.0 mL) and the mixture was cooled to  $-78$   $^{\circ}$ C. A solution of NBS (62 mg, 0.35 mmol, 1.8 eq.) in MeOH (3.0 mL) was added dropwise. After 1 h saturated aqueous solution of Na<sub>2</sub>S<sub>2</sub>O<sub>3</sub> (2 mL) was added. After 2 min. the reaction mixture was allowed to warm to r.t. The reaction mixture was diluted with EtOAc (10 mL) and washed with water (5 mL). The aqueous layer was extracted with EtOAc (2 x 15 mL), the combined organic layers were dried over MgSO<sub>4</sub>, filtered and concentrated under vacuum. Purification by flash column chromatography (*n*-hexane:Et<sub>2</sub>O 98:2) gave (*R*)-**11a** (33 mg, 72 %) as an oil; er (*R*:*S*) 98:2; *R*<sub>f</sub> 0.56 (petrol:Et<sub>2</sub>O 95:5); [ $\alpha$ ]<sub>D</sub><sup>20</sup>  $-11.2$  (*c* 0.67, CHCl<sub>3</sub>); IR (film):  $\nu$  (cm<sup>-1</sup>) 3026, 2956, 2926, 2834, 1600, 1583, 1485, 1453, 1259, 1157, 1045, 871, 777, 747; <sup>1</sup>H NMR (400 MHz, CDCl<sub>3</sub>)  $\delta$  ppm 7.31–7.23 (m, 3H), 7.21–7.13 (m, 3H), 6.83 (br d, *J* = 7.5 Hz, 1H), 6.79–6.74 (m, 2H), 3.83 (s, 3H), 2.72 (sx, *J* = 6.9 Hz, 1H), 2.60–2.49 (m, 2H), 2.01–1.85 (m, 2H), 1.29 (d, *J* = 7.5 Hz, 3H); <sup>13</sup>C NMR (100 MHz, CDCl<sub>3</sub>)  $\delta$  ppm 159.7, 149.0, 142.5, 129.3, 128.4, 128.2, 125.6, 119.5, 113.1, 110.9, 55.1, 39.9, 39.6, 33.9, 22.5; HRMS (CI) calcd. For C<sub>17</sub>H<sub>21</sub>O [M+H]<sup>+</sup> 241.1592, found 241.1590.

Resolution of the enantiomers of **11a** was achieved using a chiral SFC system fitted with a Chiracel IB column as the stationary phase with CO<sub>2</sub>:[*n*-hexane:*i*-PrOH (9:1 v:v)] as the mobile phase at a flow rate of 4.0 mL min<sup>-1</sup> (*P* = 125 bar). Injection volume: 20  $\mu$ L of a 2 g L<sup>-1</sup> solution of compound in the eluent. Under these conditions, the faster running component (*S*) and the slower running component (*R*) were eluted at 3.8 and 4.2 min., respectively, with a total analysis time of 15 min.

### **(R)-1-methoxy-3-(1-phenylethyl)benzene [(R)-11I]**

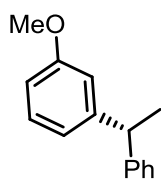

A solution of 3-methoxybromobenzene (40  $\mu$ L, 0.32 mmol, 1.2 eq.) in THF (2.0 mL) was cooled to  $-78$   $^{\circ}$ C and treated with *n*-BuLi (0.2 mL, 0.32 mmol, 1.2 eq., 1.6 M in hexanes). The mixture was stirred at  $-78$   $^{\circ}$ C for 1 h and then a solution of (R)-**11** (58 mg, 0.25 mmol, 1.0 eq.) in THF (1.0 mL) was added. The mixture was stirred at  $-78$   $^{\circ}$ C for 1 h at which point  $^{11}$ B NMR spectroscopy showed complete formation of the 'ate' complex [( $^{11}$ B NMR, 96 MHz, THF)  $\delta_{\text{B}} \sim 8$  ppm]. The mixture was warmed to r.t. and the solvents were removed under high vacuum. The crude was re-dissolved in MeOH (2.0 mL) and the mixture was cooled to  $-78$   $^{\circ}$ C. A solution of NBS (62 mg, 0.35 mmol, 1.8 eq.) in MeOH (3.0 mL) was added dropwise. After 1 h saturated aqueous solution of  $\text{Na}_2\text{S}_2\text{O}_3$  (2 mL) was added. After 2 min. the reaction mixture was allowed to warm to r.t. The reaction mixture was diluted with EtOAc (10 mL) and washed with water (5 mL). The aqueous layer was extracted with EtOAc (2 x 15 mL), the combined organic layers were dried over  $\text{MgSO}_4$ , filtered and concentrated under vacuum. Purification by flash column chromatography (*n*-hexane:Et<sub>2</sub>O 98:2) gave (R)-**11I** (25 mg, 43%) as an oil; er (*R*:*S*) 97:3;  $R_f$  0.49 (petrol:Et<sub>2</sub>O 95:5);  $[\alpha]_{\text{D}}^{23} 2$  (*c* 1,  $\text{CHCl}_3$ );  $^1\text{H}$  NMR (400 MHz,  $\text{CDCl}_3$ )  $\delta$  ppm 7.31–7.15 (m, 6H), 6.83 (br d,  $J = 7.5$  Hz, 1H), 6.78 (m, 1H), 6.73 (ddd,  $J = 8.2, 2.6, 0.8$  Hz, 1H), 4.12 (q,  $J = 7.2$  Hz, 1H), 3.77 (s, 3H), 1.63 (d,  $J = 7.2$  Hz, 3H);  $^{13}\text{C}$  NMR (100 MHz,  $\text{CDCl}_3$ )  $\delta$  ppm 159.6, 148.0, 146.2, 129.3, 128.3, 127.6, 126.0, 120.1, 113.8, 110.9, 55.1, 44.8, 21.8.

Data in accordance with literature.<sup>18</sup>

Resolution of the enantiomers of **11I** was achieved using a chiral SFC system fitted with a Chiracel IA column as the stationary phase with  $\text{CO}_2$ :*n*-hexane as the mobile phase at a flow rate of 4.0 mL  $\text{min}^{-1}$  ( $P = 125$  bar). Injection volume: 20  $\mu$ L of a 2 g  $\text{L}^{-1}$  solution of compound in the eluent. Under these conditions, the faster running component (*R*) and the slower running component (*S*) were eluted at 10.5 and 13.2 min., respectively, with a total analysis time of 20 min.

<sup>18</sup> Lopez-Perez, A.; Adrio, J.; Carretero, J. C.; *Org. Lett.*, **2009**, *11*, 5514.



**(R)-1,2-dimethoxy-3-(4-(4-methoxyphenyl)butan-2-yl)benzene [(R)-12b]**

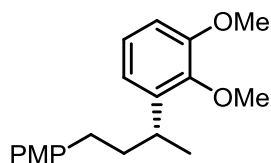

A solution of 3,4-dimethoxybromobenzene (29  $\mu\text{L}$ , 0.19 mmol, 1.1 eq.) in THF (1.0 mL) was cooled to  $-78\text{ }^\circ\text{C}$  and treated with *t*-BuLi (0.2 mL, 0.38 mmol, 2.2 eq., 1.7 M in hexanes). The mixture was stirred at  $-78\text{ }^\circ\text{C}$  for 1 h and then a solution of (*R*)-**1b** (50 mg, 0.17 mmol, 1.0 eq.) in THF (1.0 mL) was added. The mixture was stirred at  $-78\text{ }^\circ\text{C}$  for 1 h at which point  $^{11}\text{B}$  NMR spectroscopy showed complete formation of the 'ate' complex [ $^{11}\text{B}$  NMR, 96 MHz, THF)  $\delta_{\text{B}} \sim 8$  ppm]. The mixture was warmed to r.t. and the solvents were removed under high vacuum. The crude was re-dissolved in MeOH (2.0 mL) and the mixture was cooled to  $-78\text{ }^\circ\text{C}$ . A solution of NBS (46 mg, 0.26 mmol, 1.5 eq.) in MeOH (3.0 mL) was added dropwise. After 1 h saturated aqueous solution of  $\text{Na}_2\text{S}_2\text{O}_3$  (2 mL) was added. After 2 min. the reaction mixture was allowed to warm to r.t. The reaction mixture was diluted with EtOAc (10 mL) and washed with water (5 mL). The aqueous layer was extracted with EtOAc (2 x 15 mL), the combined organic layers were dried over  $\text{MgSO}_4$ , filtered and concentrated under vacuum. Purification by flash column chromatography (*n*-hexane:Et<sub>2</sub>O 98:2) gave (*R*)-**12b** (24 mg, 46%) as an oil; er (*R*:*S*) 95:5;  $R_f$  0.23 (pentane:Et<sub>2</sub>O 85:15);  $[\alpha]_{\text{D}}^{22}$  33 (*c* 0.48,  $\text{CHCl}_3$ ); IR (film):  $\nu$  ( $\text{cm}^{-1}$ ) 2956, 2931, 2833, 1611, 1582, 1510, 1475, 1243, 1036, 1008, 745;  $^1\text{H}$  NMR (400 MHz,  $\text{CDCl}_3$ )  $\delta$  ppm 7.11–7.03 (m, 3H), 6.88–6.76 (m, 4H), 3.88 (s, 3H), 3.78 (s, 3H), 3.77 (s, 3H), 3.26 (app. sx,  $J = 7.0$  Hz, 1H), 2.55 (m, 1H), 2.45 (m, 1H), 1.96–1.79 (m, 2H), 1.27 (d,  $J = 7.0$  Hz, 3H);  $^{13}\text{C}$  NMR (100 MHz,  $\text{CDCl}_3$ )  $\delta$  ppm 157.6, 152.7, 146.7, 141.1, 134.8, 129.2, 124.0, 118.7, 113.6, 109.6, 60.8, 55.6, 55.2, 39.6, 33.2, 31.7, 22.0; HRMS (EI) calcd. for  $\text{C}_{19}\text{H}_{24}\text{O}_3$  [ $M$ ]<sup>+</sup> 300.1725, found 300.1717.

Resolution of the enantiomers of **12b** was achieved using a chiral HPLC system fitted with a Chiralcel IB column as the stationary phase with hexane:MTBE (95:5) as the mobile phase at a flow rate of  $0.7\text{ mL min}^{-1}$ . Injection volume: 2  $\mu\text{L}$  of a  $2\text{ g L}^{-1}$  solution of the eluent. Under these conditions, the faster running component (*R*) and the slower running component (*S*) were eluted at 34.3 and 38.7 min., respectively, with an analysis time of 40 min.

**(R)-1,2-dimethoxy-4-(4-(4-methoxyphenyl)butan-2-yl)benzene [(R)-13b]**

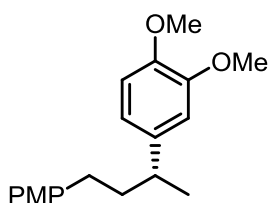

A solution of 3,4-dimethoxybromobenzene (29  $\mu\text{L}$ , 0.19 mmol, 1.1 eq.) in THF (1.0 mL) was cooled to  $-78\text{ }^\circ\text{C}$  and treated with *t*-BuLi (0.2 mL, 0.38 mmol, 2.2 eq., 1.7 M in hexanes). The mixture was stirred at  $-78\text{ }^\circ\text{C}$  for 1 h and then a solution of (*R*)-**1b** (50 mg, 0.17 mmol, 1.0

eq.) in THF (1.0 mL) was added. The mixture was stirred at  $-78\text{ }^{\circ}\text{C}$  for 1 h at which point  $^{11}\text{B}$  NMR spectroscopy showed complete formation of the ‘ate’ complex [ $^{11}\text{B}$  NMR, 96 MHz, THF)  $\delta_{\text{B}} \sim 8$  ppm]. The mixture was warmed to r.t. and the solvents were removed under high vacuum. The crude was re-dissolved in MeOH (2.0 mL) and the mixture was cooled to  $-78\text{ }^{\circ}\text{C}$ . A solution of NBS (46 mg, 0.26 mmol, 1.5 eq.) in MeOH (3.0 mL) was added dropwise. After 1 h saturated aqueous solution of  $\text{Na}_2\text{S}_2\text{O}_3$  (2 mL) was added. After 2 min. the reaction mixture was allowed to warm to r.t. The reaction mixture was diluted with EtOAc (10 mL) and washed with water (5 mL). The aqueous layer was extracted with EtOAc (2 x 15 mL), the combined organic layers were dried over  $\text{MgSO}_4$ , filtered and concentrated under vacuum. Purification by flash column chromatography (*n*-hexane:Et<sub>2</sub>O 98:2) gave (*R*)-**13b** (26 mg, 51%) as an oil; er (*R*:*S*) 95:5;  $R_f$  0.16 (pentane:Et<sub>2</sub>O 85:15);  $[\alpha]_{\text{D}}^{22} - 20$  (*c* 0.73,  $\text{CHCl}_3$ ); IR (film):  $\nu$  ( $\text{cm}^{-1}$ ) 2954, 2931, 2833, 1591, 1511, 1441, 1243, 1030, 830;  $^1\text{H}$  NMR (400 MHz,  $\text{CDCl}_3$ )  $\delta$  ppm 7.08–7.04 (m, 2H), 6.85–6.81 (m, 3H), 6.76 (dd,  $J = 8.0, 1.9$  Hz, 1H), 6.72 (d,  $J = 1.9$  Hz, 1H), 3.90 (s, 3H), 3.88 (s, 3H), 3.80 (s, 3H), 2.67 (app. sx,  $J = 7.0$  Hz, 1H), 2.51–2.44 (m, 2H), 1.91–1.83 (m, 2H), 1.27 (d,  $J = 7.0$  Hz, 3H);  $^{13}\text{C}$  NMR (100 MHz,  $\text{CDCl}_3$ )  $\delta$  ppm 157.6, 148.8, 147.1, 140.0, 134.6, 129.2, 118.8, 113.7, 111.2, 110.3, 55.9, 55.8, 55.2, 40.3, 39.0, 33.0, 22.7; HRMS (EI) calcd. for  $\text{C}_{19}\text{H}_{24}\text{O}_3$  [ $M$ ]<sup>+</sup> 300.1725, found 300.1721.

Resolution of the enantiomers of **13b** was achieved using a chiral HPLC system fitted with a Chiracel IC column as the stationary phase with hexane:*i*-PrOH as the mobile phase at a flow rate of  $0.7\text{ mL min}^{-1}$ . Injection volume: 2  $\mu\text{L}$  of a  $2\text{ g L}^{-1}$  solution of compound in the eluent. Under these conditions, the faster running component (*R*) and the slower running component (*S*) were eluted at 24.3 and 26.3 min., respectively, with a total analysis time of 40 min.

#### (*S*)-1-bromo-3-methoxy-5-(4-(4-methoxyphenyl)butan-2-yl)benzene [(*S*)-**14b**]

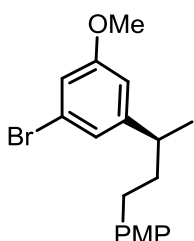

A solution of 3,5-dibromoanisole (85 mg, 0.32 mmol, 1.2 eq.) in THF (1.0 mL) was cooled to  $-78\text{ }^{\circ}\text{C}$  and treated with *t*-BuLi (0.4 mL, 0.64 mmol, 2.4 eq., 1.7 M in hexanes). The mixture was stirred at  $-78\text{ }^{\circ}\text{C}$  for 1 h and then a solution of (*S*)-**1b** (72 mg, 0.25 mmol, 1.0 eq.) in THF (1.0 mL) was added. The mixture was stirred at  $-78\text{ }^{\circ}\text{C}$  for 1 h at which point  $^{11}\text{B}$  NMR spectroscopy showed complete formation of the ‘ate’ complex [ $^{11}\text{B}$  NMR, 96 MHz, THF)  $\delta_{\text{B}} \sim 8$  ppm]. The mixture was warmed to r.t. and the solvents were removed under high vacuum. The crude was re-dissolved in MeOH (2.0 mL) and the mixture was cooled to  $-78\text{ }^{\circ}\text{C}$ . A

solution of NBS (108 mg, 0.61 mmol, 2.4 eq.) in MeOH (5.0 mL) was added dropwise. After 1 h saturated aqueous solution of Na<sub>2</sub>S<sub>2</sub>O<sub>3</sub> (2 mL) was added. After 2 min. the reaction mixture was allowed to warm to r.t. The reaction mixture was diluted with EtOAc (10 mL) and washed with water (5 mL). The aqueous layer was extracted with EtOAc (2 x 15 mL), the combined organic layers were dried over MgSO<sub>4</sub>, filtered and concentrated under vacuum. Purification by flash column chromatography (*n*-hexane:Et<sub>2</sub>O 98:2) gave (*S*)-**14b** (70 mg, 81%) as an oil; er (*S*:*R*) 95:5; *R*<sub>f</sub> 0.40 (petrol:Et<sub>2</sub>O 9:1); [ $\alpha$ ]<sub>D</sub><sup>22</sup> -1 (*c* 1, CHCl<sub>3</sub>); IR (film):  $\nu$  (cm<sup>-1</sup>) 2957, 2926, 2848, 2350, 1595, 1567, 1512, 1457, 1267, 1244, 1037, 820, 693 <sup>1</sup>H NMR (400 MHz, CDCl<sub>3</sub>)  $\delta$  ppm 7.04 (d, *J* = 8.9 Hz, 2H), 6.94 (m, 1H), 6.89 (m, 1H), 6.81 (d, *J* = 8.9 Hz, 2H), 6.66 (m, 1H), 3.80 (s, 3H), 3.79 (s, 3H), 2.63 (app. sx, *J* = 7.0 Hz, 1H), 2.45 (t, *J* = 8.0 Hz, 2H), 1.92–1.78 (m, 2H), 1.23 (d, *J* = 7.0 Hz, 3H); <sup>13</sup>C NMR (100 MHz, CDCl<sub>3</sub>)  $\delta$  ppm 160.4, 157.7, 150.7, 134.2, 129.2, 122.7, 122.6, 114.2, 113.7, 112.4, 55.4, 55.2, 39.8, 39.4, 32.8, 22.2; HRMS (EI) calcd. for C<sub>18</sub>H<sub>21</sub>BrO<sub>2</sub> [*M*]<sup>+</sup> 348.0725, found 348.0718.

Resolution of the enantiomers of **14b** was achieved using a chiral HPLC system fitted with a Chiralpak IA column with guard as the stationary phase with *n*-hexanes as the mobile phase at a flow rate of 0.8 mL min<sup>-1</sup> (*T* = 0 °C). Injection volume: 5  $\mu$ L of a 2 g L<sup>-1</sup> solution of the eluent. Under these conditions, the faster running component (*S*) and the slower running component (*R*) were eluted at 44.2 and 56.3 min., respectively, with a total analysis time of 70 min.

#### (*R*)-1-(4-Phenylbutan-2-yl)naphthalene [(*R*)-**15a**]

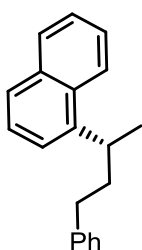

A solution of 1-bromonaphthalene (28  $\mu$ L, 0.16 mmol, 1.2 eq.) in Et<sub>2</sub>O (1.0 mL) was cooled to 0 °C and *n*-BuLi (0.1 mL, 0.16 mmol, 1.2 eq., 1.6 M in hexanes) was added dropwise. The mixture was stirred at 0 °C for 1 h. (*R*)-**1a** (36 mg, 0.125 mmol, 1.0 eq.) was added as a solution in Et<sub>2</sub>O (0.5 mL) and the reaction was stirred at the same temperature for 1 h at which point <sup>11</sup>B NMR spectroscopy showed complete formation of the boron-ate complex [(<sup>11</sup>B NMR, 96 MHz)  $\delta_B$  ~ 8 ppm]. The mixture was warmed to r.t. and the solvents were removed under high vacuum. The crude was re-dissolved in MeOH (2 mL) and the mixture was cooled to -78 °C. A solution of NBS (53 mg, 0.32 mmol, 2.4 eq.) in MeOH (3.0 mL) was added dropwise and the reaction mixture was warmed to r.t. After 1 h saturated aqueous solution of Na<sub>2</sub>S<sub>2</sub>O<sub>3</sub> (2 mL) was added. The reaction mixture was diluted with EtOAc (10 mL) and washed with water (5 mL). The aqueous layer was extracted with EtOAc (2 x 15 mL), the combined organic layers

were dried over  $\text{MgSO}_4$ , filtered and concentrated under vacuum. The crude material was adsorbed on silica and purified by flash column chromatography on silica gel eluting with *n*-hexane to give (*R*)-**15a** (23 mg, 89%) as an oil; er (*R*:*S*) 98:2;  $R_f$  0.47 (petrol);  $[\alpha]_D^{22}$  40 (*c* 1.0,  $\text{CHCl}_3$ ); IR (film):  $\nu$  ( $\text{cm}^{-1}$ ) 3026, 2959, 2926, 2858, 1596, 1509, 1496, 1453, 1395, 1375, 1256, 1168, 797, 777, 747;  $^1\text{H}$  NMR (400 MHz,  $\text{CDCl}_3$ )  $\delta$  ppm 8.00 (m, 1H), 7.88 (m, 1H), 7.73 (dd,  $J = 7.4, 1.7$  Hz, 1H), 7.50–7.43 (m, 3H), 7.30–7.25 (m, 3H), 7.21–7.13 (m, 3H), 3.64 (app. sx,  $J = 6.9$  Hz, 1H), 2.73–2.59 (m, 2H), 2.14 (m, 1H), 2.08 (m, 1H), 1.44 (d,  $J = 6.9$  Hz, 3H);  $^{13}\text{C}$  NMR (100 MHz,  $\text{CDCl}_3$ )  $\delta$  ppm 143.3, 142.4, 133.9, 131.6, 128.9, 128.4, 128.3, 126.3, 125.7, 125.6, 125.6, 125.2, 123.1, 122.5, 39.5, 33.9, 31.5, 21.77; HRMS (EI) calcd. for  $\text{C}_{20}\text{H}_{20}$  [ $M$ ] 260.1565, found 260.1570.

Resolution of the enantiomers of **15a** was achieved using chiral HPLC system fitted with a Chiracel OJ-H column with guard as the stationary phase and *n*-hexane:*i*-PrOH (99:1) as the mobile phase at a flow rate of  $0.5 \text{ mL min}^{-1}$  ( $T = 5 \text{ }^\circ\text{C}$ ). Injection volume:  $20 \mu\text{L}$  of a  $2 \text{ g L}^{-1}$  solution of compound in the eluent. Under these conditions, the faster running component (*S*) and the slower running component (*R*) major were eluted at 50.7 min and 60.7 min., respectively, with an analysis time of 85 min.

#### (*S*)-2-(4-(4-methoxyphenyl)butan-2-yl)naphthalene [(*S*)-**16b**]

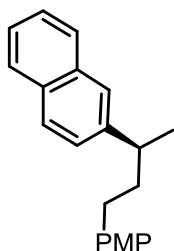

A solution of 2-bromonaphthalene (43 mg, 0.21 mmol, 1.2 eq.) in  $\text{Et}_2\text{O}$  (1.0 mL) was cooled to  $-15 \text{ }^\circ\text{C}$  and treated with *n*-BuLi (0.13 mL, 0.21 mmol, 1.2 eq., 1.7 M in hexanes). The mixture was stirred at  $-15 \text{ }^\circ\text{C}$  for 30 min. and then a solution of (*S*)-**1b** (50 mg, 0.17 mmol, 1.0 eq.) in  $\text{Et}_2\text{O}$  (1.0 mL) was added. The mixture was stirred at  $-15 \text{ }^\circ\text{C}$  for 30 min. at which point  $^{11}\text{B}$  NMR spectroscopy showed complete formation of the ‘ate’ complex [ $^{11}\text{B}$  NMR, 96 MHz, THF)  $\delta_B \sim 8$  ppm]. The mixture was warmed to r.t. and the solvents were removed under high vacuum. The crude was re-dissolved in MeOH (2.0 mL) and the mixture was cooled to  $-15 \text{ }^\circ\text{C}$ . A solution of NBS (74 mg, 0.41 mmol, 2.0 eq.) in MeOH (3.0 mL) was added dropwise. After 1 h saturated aqueous solution of  $\text{Na}_2\text{S}_2\text{O}_3$  (2 mL) was added. After 2 min. the reaction mixture was allowed to warm to r.t. The reaction mixture was diluted with EtOAc (10 mL) and washed with water (5 mL). The aqueous layer was extracted with EtOAc (2 x 15 mL), the combined organic layers were dried over  $\text{MgSO}_4$ , filtered and concentrated under vacuum. Purification by flash column chromatography (*n*-hexane: $\text{Et}_2\text{O}$  98:2) gave (*S*)-**16b** (31 mg, 62%) as an oil; er (*S*:*R*) 96:4;  $R_f$  0.72 (petrol: $\text{Et}_2\text{O}$  95:5); IR (film):  $\nu$  ( $\text{cm}^{-1}$ ) 2955, 2924,

1510, 1243, 1037, 817, 745;  $^1\text{H}$  NMR (400 MHz,  $\text{CDCl}_3$ )  $\delta$  ppm 7.87–7.80 (m, 3H), 7.65 (s, 1H), 7.52–7.42 (m, 2H), 7.38 (dd,  $J = 8.5, 1.3$  Hz, 1H), 7.11–7.05 (m, 2H), 6.89–6.83 (m, 2H), 3.80 (s, 3H), 2.90 (app. sx,  $J = 6.9$  Hz, 1H), 2.58–2.44 (m, 2H), 2.10–1.91 (m, 2H), 1.39 (d,  $J = 6.9$  Hz, 3H);  $^{13}\text{C}$  NMR (100 MHz,  $\text{CDCl}_3$ )  $\delta$  ppm 157.6, 144.8, 134.5, 133.6, 132.2, 129.2, 128.0, 127.6, 127.5, 125.8, 125.8, 125.3, 125.1, 113.7, 55.2, 40.0, 39.5, 33.0, 22.5; HRMS (EI) calcd. for  $\text{C}_{21}\text{H}_{22}\text{O}$  [ $M$ ] $^+$  290.1671, found 290.1668.

**(S)-4-(3-(naphthalen-2-yl)butyl)phenol {(S)-16b[OH]}**

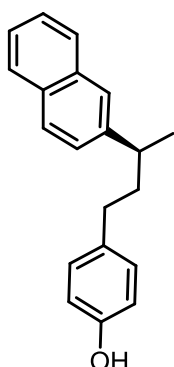

The enantioenriched material **16b** could not be purified on several attempts. The impure product was therefore derivatised by subjecting it to demethylation conditions.<sup>19</sup> A round bottom flask was charged with **16b** (71 mg, 0.26 mmol). Anhydrous  $\text{CH}_2\text{Cl}_2$  ([0.025]) was added and the solution cooled to 0 °C.  $\text{BBr}_3$  (1 M in  $\text{CH}_2\text{Cl}_2$ , 0.2 mL, 0.2 mmol, 2.0 eq.) was added. After 1 h at 0 °C,  $\text{H}_2\text{O}$  was added and the reaction mixture was allowed to warm to room temperature. The reaction mixture was diluted with  $\text{Et}_2\text{O}$  (10 mL) and water (10 mL). The layers were separated and the aqueous layer was extracted with  $\text{Et}_2\text{O}$ . The combined organic layers were dried over  $\text{MgSO}_4$ , filtered and concentrated under vacuum. The crude material was adsorbed on silica and purified by flash column chromatography on silica gel eluting with *n*-hexane:  $\text{EtOAc}$  (95:5) to give (S)-**16b**-[OH] (22 mg, 30%) as a solid; er (*S*:*R*) 96:4;  $R_f$  0.29 (petrol:EtOAc 9:1);  $[\alpha]_D^{24}$  18 (*c* 0.6,  $\text{CHCl}_3$ ); mp. 111–114 °C; IR (film):  $\nu$  ( $\text{cm}^{-1}$ ) 3490, 2920, 2857, 1509, 1227, 816, 718;  $^1\text{H}$  NMR (400 MHz,  $\text{CDCl}_3$ )  $\delta$  ppm 7.85–7.79 (m, 3H), 7.63 (s, 1H), 7.50–7.41 (m, 2H), 7.38 (dd,  $J = 8.5, 1.7$  Hz, 1H), 7.07–7.01 (m, 2H), 6.78–6.72 (m, 2H), 4.55 (s, 1H), 2.90 (app. sx,  $J = 6.9$  Hz, 1H), 2.56–2.42 (m, 2H), 2.07–1.90 (m, 2H), 1.37 (d,  $J = 6.9$  Hz, 3H);  $^{13}\text{C}$  NMR (100 MHz,  $\text{CDCl}_3$ )  $\delta$  ppm 153.4, 144.7, 134.7, 133.6, 132.2, 129.4, 128.0, 127.6, 127.5, 125.8, 125.7, 125.3, 125.1, 115.1, 40.0, 39.5, 33.0, 22.4; HRMS (EI) calcd. for  $\text{C}_{20}\text{H}_{20}\text{O}$  [ $M$ ] $^+$  276.1514, found 276.1526.

Resolution of the enantiomers of **16b**-[OH] was achieved using a chiral SFC system fitted with a Chiracel IA column as the stationary phase with  $\text{CO}_2$ : [*n*-hexane:*i*-PrOH (1:1 v:v)] as the mobile phase at a flow rate of 4.0 mL  $\text{min}^{-1}$  ( $P = 125$  bar). Injection volume: 20  $\mu\text{L}$  of a 2 g  $\text{L}^{-1}$  solution of compound in the eluent. Under these conditions, the faster running

<sup>19</sup> McOmie, J. F. W.; Watts, M. L.; West, D. E.; *Tetrahedron*, **1968**, *24*, 2289.

component (*S*) and the slower running component (*R*) were eluted at 26.1 and 29.3 min., respectively, with an analysis time of 40 min.

### (*S*)-9-(4-(4-methoxyphenyl)butan-2-yl)phenanthrene [(*S*)-17b]

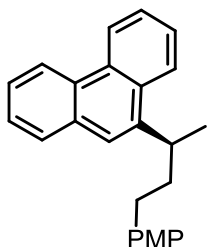

A solution of 9-bromoanthracene (53 mg, 0.21 mmol, 1.2 eq.) in THF (1.0 mL) was cooled to  $-78\text{ }^{\circ}\text{C}$  and treated with *t*-BuLi (0.26 mL, 0.41 mmol, 2.4 eq., 1.7 M in hexanes). The mixture was stirred at  $-78\text{ }^{\circ}\text{C}$  for 1 h and then a solution of (*S*)-1b (50 mg, 0.17 mmol, 1.0 eq.) in THF (1.0 mL) was added. The mixture was stirred at  $-78\text{ }^{\circ}\text{C}$  for 1 h at which point  $^{11}\text{B}$  NMR spectroscopy showed complete formation of the ‘ate’ complex [ $^{11}\text{B}$  NMR, 96 MHz, THF)  $\delta_{\text{B}} \sim 8$  ppm]. The mixture was warmed to r.t. and the solvents were removed under high vacuum. The crude was re-dissolved in MeOH (2.0 mL) and the mixture was cooled to  $-78\text{ }^{\circ}\text{C}$ . A solution of NBS (74 mg, 0.41 mmol, 2.4 eq.) in MeOH (3.0 mL) was added dropwise. After 1 h saturated aqueous solution of  $\text{Na}_2\text{S}_2\text{O}_3$  (2 mL) was added. After 2 min. the reaction mixture was allowed to warm to r.t. The reaction mixture was diluted with EtOAc (10 mL) and washed with water (5 mL). The aqueous layer was extracted with EtOAc (2 x 15 mL), the combined organic layers were dried over  $\text{MgSO}_4$ , filtered and concentrated under vacuum. Purification by flash column chromatography (*n*-hexane:Et<sub>2</sub>O 98:2) gave (*S*)-17b (27 mg, 47%) as an oil; er (*S*:*R*) 96:4;  $R_{\text{f}}$  0.55 (pentane:Et<sub>2</sub>O 95:5);  $[\alpha]_{\text{D}}^{20} -12.1$  (*c* 0.4,  $\text{CHCl}_3$ ); IR (film):  $\nu$  ( $\text{cm}^{-1}$ ) 2958, 2930, 1610, 1510, 1450, 1243, 1035, 745, 724;  $^1\text{H}$  NMR (400 MHz,  $\text{CDCl}_3$ )  $\delta$  ppm 8.78 (d,  $J = 8.2$  Hz, 1H), 8.68 (d,  $J = 7.2$  Hz, 1H), 8.06 (d,  $J = 8.2$  Hz, 1H), 7.87 (d,  $J = 6.8$  Hz, 1H), 7.70–7.56 (m, 5H), 7.12–7.07 (m, 2H), 6.86–6.81 (m, 2H), 3.80 (s, 3H), 3.63 (app. sx,  $J = 6.8$  Hz, 1H), 2.76–2.63 (m, 2H), 2.26 (m, 1H), 2.04 (m, 1H), 1.53 (d,  $J = 6.8$  Hz, 3H);  $^{13}\text{C}$  NMR (100 MHz,  $\text{CDCl}_3$ )  $\delta$  ppm 157.7, 141.4, 134.5, 131.9, 131.1, 130.8, 129.4, 129.4, 128.3, 126.6, 126.4, 126.0, 125.9, 123.8, 123.3, 122.4, 113.7, 55.3, 39.4, 33.0, 29.7, 21.4; HRMS (EI) calcd. for  $\text{C}_{25}\text{H}_{24}\text{O}$  [ $M$ ]<sup>+</sup> 340.1827, found 340.1823.

### (*S*)-4-(3-(phenanthren-9-yl)butyl)phenol {(*S*)-17b[OH]}

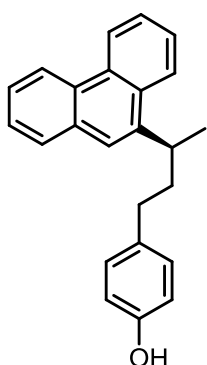

The enantioenriched material (*S*)-17b could not be purified on several attempts. The impure product was therefore derivatised by subjecting it to demethylation conditions.<sup>19</sup> A round bottom flask was charged with (*S*)-17b (31 mg, 0.09 mmol). Anhydrous  $\text{CH}_2\text{Cl}_2$  [0.025] was added and the solution cooled to  $0\text{ }^{\circ}\text{C}$ .  $\text{BBr}_3$  (1M in  $\text{CH}_2\text{Cl}_2$ , 0.2 mL, 0.2 mmol, 2.0 eq)

was added. After 1 h at 0 °C, water (1 mL) was added and the reaction mixture was allowed to warm to r.t. The reaction mixture was diluted with Et<sub>2</sub>O (10 mL) and water (10 mL). The layers were separated and the aqueous layer was extracted with Et<sub>2</sub>O (3 x 10 mL). The combined organic layers were dried over MgSO<sub>4</sub>, filtered and concentrated under vacuum. The crude material was adsorbed on silica and purified by flash column chromatography on silica gel eluting with *n*-hexane: EtOAc (95:5) to give (*S*)-**17b**-[OH] (19 mg, 66%) as an oil; er (*S*:*R*) 96:4; *R*<sub>f</sub> 0.30 (petrol:EtOAc 90:10); [ $\alpha$ ]<sub>D</sub><sup>24</sup> 13 (*c* 0.63, CHCl<sub>3</sub>) IR (film):  $\nu$  (cm<sup>-1</sup>) 3330, 3021, 2960, 2925, 2856, 1512, 1449, 1224, 746, 725; <sup>1</sup>H NMR (400 MHz, CDCl<sub>3</sub>)  $\delta$  ppm 8.78 (d, *J* = 8.0 Hz, 1H), 8.69 (d, *J* = 8.0 Hz, 1H), 8.01 (d, *J* = 8.0 Hz, 1H), 7.88 (d, *J* = 7.1 Hz, 1H), 7.71–7.58 (m, 5H), 7.07–7.01 (m, 2H), 6.79–6.72 (m, 2H), 4.74 (s, 1H), 3.63 (app. sx, *J* = 6.8 Hz, 1H), 2.68 (m, 2H), 2.25 (m, 1H), 2.05 (m, 1H), 1.51 (d, *J* = 6.8 Hz, 3H); <sup>13</sup>C NMR (100 MHz, CDCl<sub>3</sub>)  $\delta$  ppm 153.5, 141.4, 134.6, 131.9, 131.0, 130.7, 129.5, 129.3, 128.2, 126.5, 126.4, 126.0, 125.9, 123.7, 123.3, 123.0, 122.4, 115.1, 39.4, 33.0, 21.4; HRMS (EI) calcd. for C<sub>24</sub>H<sub>22</sub>O [*M*]<sup>+</sup> 326.1671, found 326.1674.

Resolution of the enantiomers of **17b**-[OH] was achieved using a chiral HPLC system fitted with a Chiralpak IB column with guard as the stationary phase with *n*-hexane:*i*-PrOH (97:3) as the mobile phase at a flow rate of 0.3 mL min<sup>-1</sup>. Injection volume: 5  $\mu$ L of a 2 g L<sup>-1</sup> solution of compound in the eluent. Under these conditions, the faster running component (*S*) and the slower running component (*R*) were eluted at 94.0 and 104.5 min., respectively, with a total analysis time of 130 min.

#### (*S*)-1-(4-(4-methoxyphenyl)butan-2-yl)-3,5-dimethylbenzene [(*S*)-**18b**]

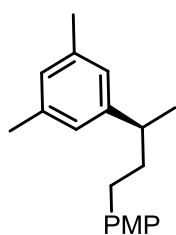

A solution of 3,5-dimethylbromobenzene (70  $\mu$ L, 0.52 mmol, 1.5 eq.) in THF (3.0 mL) was cooled to -78 °C and treated with *t*-BuLi (0.5 mL, 1.03 mmol, 3.0 eq., 1.9 M in pentane). The mixture was stirred at -78 °C for 1 h and then a solution of (*S*)-**1b** (100 mg, 0.34 mmol, 1.0 eq.) in THF (1.0 mL) was added. The mixture was stirred at -78 °C for 1 h at which point <sup>11</sup>B NMR spectroscopy showed complete formation of the ‘ate’ complex [<sup>11</sup>B NMR, 96 MHz, THF)  $\delta_B$  ~ 8 ppm]. The mixture was warmed to r.t. and the solvents were removed under high vacuum. The crude was re-dissolved in MeOH (2.0 mL) and the mixture was cooled to -78 °C. A solution of NBS (122 mg, 0.69 mmol, 2.0 eq.) in MeOH (5.0 mL) was added dropwise. After 1 h the reaction mixture was diluted with pentane (15 mL) and washed with water (15 mL). The aqueous layer was extracted with pentane (2 x 15 mL) and the combined organic layers

were dried over MgSO<sub>4</sub>, filtered and concentrated under vacuum. The residue was dissolved in 2,2,2-trifluoroethanol (5.0 mL) and *p*-toluenesulfonic acid (327 mg, 1.72 mmol, 5.0 eq.) was added. The reaction mixture was heated under reflux for 3 h. The reaction was cooled to r.t. and saturated aqueous solution of Na<sub>2</sub>S<sub>2</sub>O<sub>3</sub> (2 mL) was added. The reaction mixture was diluted with EtOAc (15 mL) and washed with water (15 mL). The aqueous layer was extracted with EtOAc (2 x 15 mL), the combined organic layers were dried over MgSO<sub>4</sub>, filtered and concentrated under vacuum. Purification by flash column chromatography on silica gel eluting with pentane:Et<sub>2</sub>O (95:5), gave (*S*)-**18b** (78 mg, 83%) as an oil; er (*S*:*R*) 96:4; *R*<sub>f</sub> 0.70 (pentane:Et<sub>2</sub>O 95:5); [α]<sub>D</sub><sup>21</sup> 23 (*c* 2.6, CHCl<sub>3</sub>); IR (film): ν (cm<sup>-1</sup>) 2954, 2920, 2855, 1607, 1511, 1242, 1176, 1037, 826, 705; <sup>1</sup>H NMR (400 MHz, CDCl<sub>3</sub>) δ ppm 7.10–7.05 (m, 2H), 6.88–6.81 (m, 5H), 3.80 (s, 3H), 2.65 (app. sx, *J* = 7.0 Hz, 1H), 2.52–2.45 (m, 2H), 2.32 (s, 6H), 1.96–1.79 (m, 2H), 1.75 (d, *J* = 7.0 Hz, 3H); <sup>13</sup>C NMR (100 MHz, CDCl<sub>3</sub>) δ ppm 157.7, 147.5, 137.8, 134.8, 129.3, 127.7, 124.9, 113.7, 55.3, 40.2, 39.4, 33.2, 22.6, 21.5.; HRMS (EI) calcd. for C<sub>19</sub>H<sub>24</sub>O [*M*]<sup>+</sup> 268.1827, found 268.1827.

Resolution of the enantiomers of **18b** was achieved using a chiral SFC system fitted with a Chiracel IA column as the stationary phase with CO<sub>2</sub>:*n*-hexane as the mobile phase at a flow rate of 2.0 mL min<sup>-1</sup> (*P* = 125 bar). Injection volume: 20 μL of a 2 g L<sup>-1</sup> solution of compound in the eluent. Under these conditions, the faster running component (*R*) and the slower running component (*S*) were eluted at 14.3 and 15.3 min., respectively, with a total analysis time of 20 min.

### 1,3-dimethyl-5-(1-phenylethyl)benzene (**18l**)

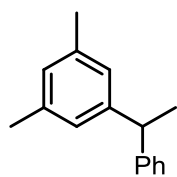

A solution of 3,5-dimethylbromobenzene (64 μL, 0.47 mmol, 1.1 eq.) in THF (3.0 mL) was cooled to -78 °C and treated with *t*-BuLi (0.61 mL, 1.04 mmol, 2.2 eq., 1.7 M in pentane). The mixture was stirred at -78 °C for 1 h and then a solution of **11** (100 mg, 0.43 mmol, 1.0 eq.) in THF (1.0 mL) was added. The mixture was stirred at -78 °C for 1 h at which point <sup>11</sup>B NMR spectroscopy showed complete formation of the 'ate' complex [(<sup>11</sup>B NMR, 96 MHz, THF) δ<sub>B</sub> ~ 8 ppm]. The mixture was warmed to r.t. and the solvents were removed under high vacuum. The crude was re-dissolved in MeOH (2.0 mL) and the mixture was cooled to -78 °C. A solution of NBS (153 mg, 0.86 mmol, 2.0 eq.) in MeOH (5.0 mL) was added dropwise. After 1 h the reaction mixture was diluted with pentane (15 mL) and washed with water (15 mL). The aqueous layer was extracted with pentane (2 x 15 mL) and the combined organic layers were



dried over MgSO<sub>4</sub>, filtered and concentrated under vacuum. The residue was dissolved in 2,2,2-trifluoroethanol (5.0 mL) and *p*-toluenesulfonic acid (327 mg, 1.72 mmol, 5.0 eq.) was added. The reaction mixture was heated under reflux for 3 h. The reaction was cooled to r.t. and saturated aqueous solution of NaHCO<sub>3</sub> (2 mL) was added. The reaction mixture was diluted with EtOAc (15 mL) and washed with water (15 mL). The aqueous layer was extracted with EtOAc (2 x 15 mL), the combined organic layers were dried over MgSO<sub>4</sub>, filtered and concentrated under vacuum. Purification by flash column chromatography on silica gel eluting with pentane:Et<sub>2</sub>O (95:5), gave **18l** (19 mg, 21%) as an oil; *R*<sub>f</sub> 0.47 (pentane:Et<sub>2</sub>O 97.5:2.5); <sup>1</sup>H NMR (300 MHz, CDCl<sub>3</sub>) δ ppm 7.09–6.89 (m, 5H), 6.62–6.57 (m, 3H), 3.83 (q, *J* = 7.2 Hz, 1H), 2.03 (s, 6H), 1.38 (d, *J* = 7.2 Hz, 3H); <sup>13</sup>C NMR (76 MHz, CDCl<sub>3</sub>) δ ppm 146.6, 146.3, 137.7, 128.3, 127.7, 127.6, 125.9, 125.4, 44.7, 21.9, 21.4. Data in accordance with literature precedent.<sup>20</sup>

#### 1-(4-(4-methoxyphenyl)butan-2-yl)-3-methylbenzene (**19b**)

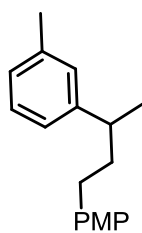

A solution of 3-bromotoluene (40 μL, 0.33 mmol, 1.2 eq.) in THF (1.0 mL) was cooled to –78 °C and treated with *t*-BuLi (0.42 mL, 0.66 mmol, 2.4 eq., 1.6 M in pentane). The mixture was stirred at –78 °C for 1 h and then a solution of **1b** (80 mg, 0.28 mmol, 1.0 eq.) in THF (1.0 mL) was added. The mixture was stirred at –78 °C for 1 h at which point <sup>11</sup>B NMR spectroscopy showed complete formation of the ‘ate’ complex [(<sup>11</sup>B NMR, 96 MHz, THF) δ<sub>B</sub> ~ 8 ppm]. The mixture was warmed to r.t. and the solvents were removed under high vacuum. The crude was re-dissolved in MeOH (2.0 mL) and the mixture was cooled to –78 °C. A solution of NBS (118 mg, 0.66 mmol, 2.4 eq.) in MeOH (4.0 mL) was added dropwise. After 1 h the reaction mixture was diluted with pentane (15 mL) and washed with water (15 mL). The aqueous layer was extracted with pentane (2 x 15 mL) and the combined organic layers were dried (MgSO<sub>4</sub>), filtered and concentrated under vacuum. The residue was dissolved in 2,2,2-trifluoroethanol (4.0 mL) and *p*-toluenesulfonic acid (238 mg, 0.69 mmol, 5.0 eq.) was added. The reaction mixture was heated under reflux for 3 h. The reaction was cooled to r.t. and NaHCO<sub>3</sub> (2 mL) was added. The reaction mixture was diluted with EtOAc (15 mL) and washed with water (15 mL). The aqueous layer was extracted with EtOAc (2 x 15 mL), the combined organic layers were dried over MgSO<sub>4</sub>, filtered and concentrated under vacuum.

<sup>20</sup> Imao, D.; Glasspoole, B. W.; Laberge, V. S; Crudden, C. M.; *J. Am. Chem. Soc.*, **2009**, *131*, 5024.

Purification by flash column chromatography on silica gel eluting with pentane:Et<sub>2</sub>O (95:5), gave a mixture of **19b** and 1-(3-bromobutyl)-4-methoxybenzene in a <sup>1</sup>H NMR ratio of 28:72 in favour of 1-(3-bromobutyl)-4-methoxybenzene. Compound **19b** was isolated in 17 % yield (12 mg). **19b**: *R*<sub>f</sub> 0.77 (pentane:Et<sub>2</sub>O 95:5); diagnostic peaks from <sup>1</sup>H NMR analysis (400 MHz, CDCl<sub>3</sub>) δ ppm 3.79 (s, 3H), 2.36 (s, 3H), 1.27 (d, *J* = 7.0 Hz, 3H); GC-MS: *R*<sub>t</sub> 7.37 min., *m/z*: 254, 161, 147, 135, 121, 105, 91, 77. 1-(3-bromobutyl)-4-methoxybenzene: *R*<sub>f</sub> 0.80 (pentane:Et<sub>2</sub>O 95:5); diagnostic peaks from <sup>1</sup>H NMR analysis (400 MHz, CDCl<sub>3</sub>) δ ppm 4.08 (m, 1H), 3.80 (s, 3H), 1.72 (d, *J* = 6.7 Hz, 3H); GC-MS: *R*<sub>t</sub> 5.39 min., *m/z*: 242/244, 162, 147, 121, 105, 121, 105, 91, 77.

**(*S*)-2-methoxy-6-(4-(4-methoxyphenyl)butan-2-yl)pyridine [(*S*)-**20b**]**

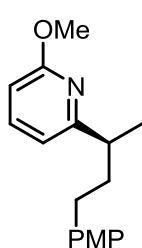

A solution of 2-bromo-6-methoxypyridine (36 μL, 0.29 mmol, 1.7 eq.) in THF:Et<sub>2</sub>O:pentane (4:1:1, 0.3 M) was cooled to -78 °C and treated with *n*-BuLi (0.2 mL, 0.29 mmol, 1.7 eq., 1.6 M in hexanes) and the mixture was stirred at this temperature for 30 min. (*S*)-**1b** (50 mg, 0.17 mmol, 1.0 eq.) was added dropwise as a solution in THF (0.5 mL). The mixture was stirred at -78 °C for 30 min. at which point <sup>11</sup>B NMR spectroscopy showed complete formation of the ‘ate’ complex [<sup>11</sup>B NMR (96 MHz, THF) δ<sub>B</sub> ~ 8 ppm]. The mixture was warmed to r.t. and the solvents were removed under high vacuum. A solution of DBDMH (1,3-dibromo-5,5-dimethylhydantoin) (197 mg, 0.69 mmol, 2.0 eq.) in MeOH (5.0 mL) was added dropwise. After 1 h at 0 °C saturated aqueous solution of Na<sub>2</sub>S<sub>2</sub>O<sub>3</sub> was added and the reaction mixture was allowed to warm to r.t. The reaction mixture was diluted with EtOAc (15 mL) and water (15 mL). The layers were separated and the aqueous layer was extracted with EtOAc (3 x 15mL). The combined organic layers were dried over MgSO<sub>4</sub>, filtered and concentrated under vacuum. The crude material was adsorbed on silica and purified by flash column chromatography on silica gel eluting with *n*-hexane to give (*S*)-**20b** (27 mg, 58%) was obtained as an oil; er (*S*:*R*) 95:5; *R*<sub>f</sub> 0.40 (petrol:Et<sub>2</sub>O 95:5); [α]<sub>D</sub><sup>23</sup> 27 (*c* 0.15, CHCl<sub>3</sub>); IR (film): ν (cm<sup>-1</sup>) 2935, 2855, 1577, 1510, 1463, 1413, 1288, 1242, 1175, 1029, 801, 743; <sup>1</sup>H NMR (400 MHz, CDCl<sub>3</sub>) δ ppm 7.49 (t, *J* = 7.3 Hz, 1H), 7.10–7.02 (d, *J* = 8.5 Hz, 2H), 6.89–6.81 (m, 2H), 6.70 (d, *J* = 7.3 Hz, 1H), 6.55 (d, *J* = 7.3 Hz, 1H), 3.94 (s, 3H), 3.79 (s, 3H), 2.80 (app. sx, *J* = 6.8 Hz, 1H), 2.54–2.42 (m, 2H), 2.13 (m, 1H), 1.85 (m, 1H), 1.29 (d, *J* = 6.8 Hz, 3H); <sup>13</sup>C NMR (100 MHz, CDCl<sub>3</sub>) δ ppm 164.0, 163.6, 157.6, 138.6, 134.8, 129.2, 114.3, 113.6, 107.4, 55.2, 53.1, 40.9, 38.6, 32.9, 20.9; HRMS (EI) calcd. for C<sub>17</sub>H<sub>21</sub>NO<sub>2</sub> [*M*]<sup>+</sup> 271.1572, found 271.1570.

Resolution of the enantiomers of **20b** was achieved using a chiral HPLC system fitted with a Chiralpak AD-H column with guard as the stationary phase with [*n*-hexane:(10 % *i*-PrOH in *n*-hexanes) (99:1, v:v)] as the mobile phase at a flow rate of 0.5 mL min<sup>-1</sup> (*T* = 0 °C). Injection volume: 5 μL of a 2 g L<sup>-1</sup> solution of compound in the eluent. Under these conditions, the faster running component (*S*) and the slower running component (*R*) were eluted at 24.6 and 26.6 min., respectively, with a total analysis time of 35 min.

## 7. Reaction Products – Coupling of tertiary boronic esters to 6-membered aromatics

### (*S*)-2-(3-Methyl-1-phenylpentan-3-yl)furan [(*S*)-**2g**]

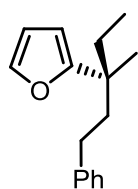

Following **GP2** (0.25 mmol scale), (*S*)-**2g** (51 mg, 89%) was obtained as an oil; er (*S*:*R*) >99:1; *R*<sub>f</sub> 0.30 (*n*-hexane); [*α*]<sub>D</sub><sup>24</sup> -22.0 (*c* 1, CHCl<sub>3</sub>); IR (film): *ν* (cm<sup>-1</sup>) 2966, 2929, 2877, 1506, 1497, 1455, 1156, 1011, 729, 680; <sup>1</sup>H NMR (400 MHz, CDCl<sub>3</sub>) *δ* ppm 7.36 (m, 1H), 7.28–7.13 (m, 5H), 6.29 (m, 1H), 6.04 (m, 1H), 2.48 (td, *J* = 13.0, 5.1 Hz, 1H), 2.32 (td, *J* = 13.1, 4.6 Hz, 1H), 1.98 (td, *J* = 13.0, 4.5 Hz, 1H), 1.85–1.7 (m, 2H), 1.67–1.55 (m, 1H), 1.29 (s, 3H), 0.77 (t, *J* = 7.5 Hz, 3H); <sup>13</sup>C NMR (100 MHz, CDCl<sub>3</sub>) *δ* ppm 161.4, 143.1, 140.7, 128.3, 128.2, 109.6, 104.9, 42.3, 39.5, 32.9, 31.0, 22.3, 8.6; HRMS (EI) calcd. for C<sub>16</sub>H<sub>20</sub>O [*M*]<sup>+</sup> 228.1514, found 228.1508.

Resolution of the enantiomers of **2g** was achieved using a chiral HPLC system fitted with a Chiralpak OD column with guard as the stationary phase with *n*-hexanes as the mobile phase at a flow rate of 0.5 mL min<sup>-1</sup> (*T* = 0 °C). Injection volume: 20 μL of a 2 g L<sup>-1</sup> solution of compound in the eluent. Under these conditions, the faster running component (*S*) and the slower running component (*R*) were eluted at 29.9 and 34.3 min., respectively, with a total analysis time of 60 min.

### (*S*)-2-(2-Phenylbutan-2-yl)furan [(*S*)-**2h**]

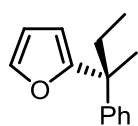

Following **GP2** (0.25 mmol scale), (*S*)-**2h** (82 mg, 83%) was obtained as an oil; er (*S*:*R*) >99:1; *R*<sub>f</sub> 0.5 (*n*-hexane); [*α*]<sub>D</sub><sup>23</sup> -2.3 (*c* 0.5, CHCl<sub>3</sub>); IR (film): *ν* (cm<sup>-1</sup>) 2970, 2929, 2879, 1599, 1504, 1494, 1456, 1380, 1159, 1014, 923, 730, 699, 598; <sup>1</sup>H NMR (400 MHz, CDCl<sub>3</sub>) *δ* ppm 7.32 (dd, *J* = 1.8, 0.9 Hz, 1H), 7.30–7.26 (m, 2H), 7.22–7.15 (m, 3H), 6.31 (dd, *J* = 3.1, 1.9 Hz, 1H), 6.16–6.13 (m, 1H), 2.14 (dq, *J* = 13.3, 7.4 Hz, 1H), 2.09–1.98 (m, 1H), 1.6 (s, 3H), 0.78 (t, *J* = 7.4 Hz, 3H); <sup>13</sup>C NMR (MHz, CDCl<sub>3</sub>) *δ*

ppm 161.4, 147.0, 141.1, 128.0, 126.4, 125.9, 109.6, 105.5, 44.0, 33.0, 24.5, 9.0; HRMS (EI) calcd. for C<sub>14</sub>H<sub>16</sub>O [M]<sup>+</sup> 200.1201, found 200.1203

Resolution of the enantiomers of **2h** was achieved using a chiral HPLC system fitted with a Chiracel OJ-RH column with guard as the stationary phase with MeCN:water (4:1, v:v) as the mobile phase at a flow rate of 1.0 mL min<sup>-1</sup> (*T* = 20 °C). Injection volume: 20 μL of a 2 g L<sup>-1</sup> solution of compound in the eluent. Under these conditions, the faster running component (*S*) and the slower running component (*R*) were eluted at 21.0 and 27.3 min., respectively, with a total analysis time of 60 min.

#### (*S*)-2-(4-Methyl-2-phenylpentan-2-yl)furan [(*S*)-**2i**]

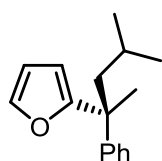

Following **GP2** (0.5 mmol scale), (*S*)-**2i** (82 mg, 76%) was obtained as an oil; er (*S*:*R*) 99:1; *R*<sub>f</sub> 0.29 (*n*-hexane); [ $\alpha$ ]<sub>D</sub><sup>23</sup> -15.4 (*c* 1.0, CHCl<sub>3</sub>); IR (film):  $\nu$  (cm<sup>-1</sup>) 2954, 2927, 1495, 1445, 1158, 1011, 729, 697, 598; <sup>1</sup>H NMR (400 MHz, CDCl<sub>3</sub>)  $\delta$  ppm 7.34–7.30 (m, 1H), 7.30–7.25 (m, 2H), 7.23–7.15 (m, 3H), 6.32 (dd, *J* = 3.1, 1.9 Hz, 1H), 6.16–6.12 (m, 1H), 2.08 (dd, *J* = 13.8, 5.8 Hz, 1H), 1.94 (dd, *J* = 13.8, 5.1 Hz, 1H), 1.66 (s, 3H), 1.65–1.60 (m, 1H), 0.79 (br d, *J* = 6.7 Hz, 3H), 0.72 (br d, *J* = 6.6 Hz, 3H); <sup>13</sup>C NMR (100 MHz, CDCl<sub>3</sub>)  $\delta$  ppm 161.5, 147.7, 140.8, 128.0, 126.3, 125.9, 109.8, 105.4, 49.0, 43.8, 25.6, 25.0, 24.7, 24.0; HRMS (EI) calcd. for C<sub>16</sub>H<sub>20</sub>O [M]<sup>+</sup> 228.1514, found 228.1522.

Resolution of the enantiomers of **2i** was achieved using a chiral GC system fitted with a Supelco  $\beta$ -DM column. Injector *T* = 250 °C, detector *T* = 300 °C. Oven conditions: *T* = 70 °C for 3 min., then ramp (0.5 °C min<sup>-1</sup>) until 180 °C, H<sub>2</sub> carrier gas at 14 psi. Under these conditions, the faster running component (*R*) and the slower running component (*S*) were eluted at 64.6 and 64.7 min., respectively, with a total analysis time of 75 min.

#### (*R*)-2-(1-cyclopropyl-1-phenylethyl)furan [(*R*)-**2j**]

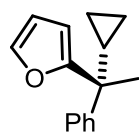

Following **GP2** (0.29 mmol scale), (*R*)-**2j** (58 mg, 94%) was obtained as an oil; er (*R*:*S*) 98:2; *R*<sub>f</sub> 0.83 (pentane:Et<sub>2</sub>O 95:5); [ $\alpha$ ]<sub>D</sub><sup>22</sup> 22.7 (*c* 1.5, CHCl<sub>3</sub>); IR (film):  $\nu$  (cm<sup>-1</sup>) 3059, 2981, 1502, 1494, 1010, 730, 698; <sup>1</sup>H NMR (400 MHz, CDCl<sub>3</sub>)  $\delta$  ppm 7.30 (br s, 1H), 7.29–7.24 (m, 4H), 7.20 (m, 1H), 6.31 (dd, *J* = 3.1, 1.8 Hz, 1H), 6.20 (d, *J* = 3.1 Hz, 1H), 1.53 (s, 3H), 1.43 (m, 1H), 0.58–0.44 (m, 2H), 0.30–0.18 (m, 2H); <sup>13</sup>C NMR (100 MHz, CDCl<sub>3</sub>)  $\delta$  ppm 161.0, 146.4, 141.3, 127.9, 127.1, 126.2, 109.5, 106.0, 43.8, 24.4, 20.5, 1.8, 1.5; HRMS (EI) calcd. for C<sub>15</sub>H<sub>16</sub>O [M]<sup>+</sup> 212.1201, found 212.1200.

Resolution of the enantiomers of **2j** was achieved using a chiral HPLC system fitted with a Chiralpak OJ-RH column with guard as the stationary phase with MeCN:water (85:15, v:v) as the mobile phase at a flow rate of 1.0 mL min<sup>-1</sup>. Injection volume: 2 μL of a 2 g L<sup>-1</sup> solution of compound in the eluent. Under these conditions, the faster running component (*R*) and the slower running component (*S*) were eluted at 3.3 and 3.9 min., respectively, with a total analysis time of 15 min.

**(*S*)-2-(1-(4-Bromophenyl)-1-phenylethyl)furan [(*S*)-2k]**

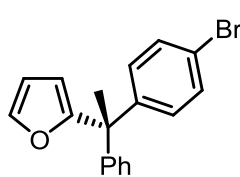

Following **GP2** (0.25 mmol scale), (*S*)-**2k** (43 mg, 53%) was obtained as an amorphous solid; er (*S*:*R*) 98:2; *R*<sub>f</sub> 0.37 (*n*-hexane); [α]<sub>D</sub><sup>21</sup> -7.6 (*c* 0.5, CHCl<sub>3</sub>); IR (film): ν (cm<sup>-1</sup>) 3058, 2980, 1589, 1489, 1395, 1373, 1359, 1260, 1209, 1148, 1075, 1026, 1008, 923, 884, 829, 803, 789, 750, 734; <sup>1</sup>H NMR (400 MHz, CDCl<sub>3</sub>) δ ppm 7.42–7.36 (m, 3H), 7.31–7.19 (m, 3H), 7.08 (dt, *J* = 6.4, 1.9 Hz, 2H), 6.99 (dt, *J* = 9.0, 2.1 Hz, 2H), 6.30 (dd, *J* = 3.1, 1.9 Hz, 1H), 5.93 (d, *J* = 3.3 Hz, 1H), 2.04 (s, 3H); <sup>13</sup>C NMR (100 MHz, CDCl<sub>3</sub>) δ ppm 159.7, 146.6, 146.3, 141.9, 131.0, 129.8, 128.0, 127.8, 126.5, 120.4, 109.9, 107.8, 49.2, 27.7; HRMS (EI) calcd. for C<sub>18</sub>H<sub>15</sub>BrO [*M*]<sup>+</sup> 326.0306, found 326.0304.

The enantiomers of **2k** could not be separated by chiral GC, HPLC or SFC. In order to evaluate the enantiomeric ratio of the reaction product it was further functionalized using Suzuki cross-coupling.

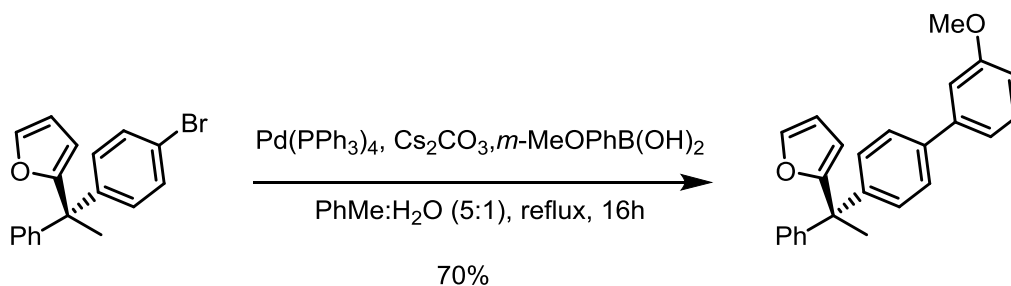

A flask was charged with Pd(PPh<sub>3</sub>)<sub>4</sub> (12 mg, 0.01 mmol, 10 mol%), Cs<sub>2</sub>CO<sub>3</sub> (4 mg, 0.01 mmol, 10 mol%) and *m*-methoxyphenyl boronic acid (31 mg, 0.20 mmol, 2.0 eq.). The flask was evacuated and refilled with nitrogen (x 3). Degassed toluene (1.0 mL) and water (0.2 mL) were added. A solution of (*S*)-**2s** (33 mg, 0.10 mmol, 1.0 eq.) in degassed toluene (1.0 mL) was added and the mixture was heated under refluxing conditions for 16 h. The reaction was cooled to room temperature and water (5 mL) was added. The layers were separated and the aqueous layer was extracted with Et<sub>2</sub>O (3 x 5 mL). The combined organic layers were

dried over MgSO<sub>4</sub>, filtered and concentrated under vacuum. The crude material was adsorbed on silica and purified by flash column chromatography on silica gel eluting *n*-hexane:Et<sub>2</sub>O (99:1→99:5) to give the desired product (24 mg, 70%) as an oil; er (*S*:*R*) 98:2; <sup>1</sup>H NMR (400 MHz, CDCl<sub>3</sub>) δ ppm 7.65–6.80 (m, 13H), 6.33 (dd, *J* = 3.4, 1.8 Hz, 1H), 5.98 (dd, *J* = 9.0, 3.5 Hz, 1H), 3.80 (s, 3H), 2.11 (s, 3H); <sup>13</sup>C NMR (100 MHz, CDCl<sub>3</sub>) δ ppm 160.3, 159.9, 147.1, 146.4, 142.3, 141.8, 139.0, 129.7, 128.7, 128.4, 128.0, 126.7, 126.4, 119.6, 112.7, 112.6, 109.9, 107.7, 55.3, 49.3, 27.8; HRMS (EI) calcd. for C<sub>25</sub>H<sub>22</sub>O<sub>2</sub> [*M*]<sup>+</sup> 354.1620, found 354.1627.

Resolution of the enantiomers of the cross-coupling product was achieved using a chiral HPLC system fitted with a Chiracel OD + OD-H column as the stationary phase with *n*-hexane:*i*-Pr (99.8:0.2, v:v) as the mobile phase at a flow rate of 0.7 mL min<sup>-1</sup> (*T* = 0 °C). Injection volume: 20 μL of 2 g L<sup>-1</sup> solution of compound in the eluent. Under these conditions the faster running component (*R*) and the slower running component (*S*) were eluted at 96.0 and 102.3 min., respectively, with a total analysis time of 120 min.

#### (*S*)-2-(3-methyl-1-phenylpentan-3-yl)benzofuran [(*S*)-**4g**]

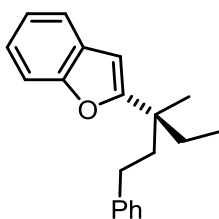

A solution of benzofuran (14 μL, 0.12 mmol, 1.2 eq.) in THF (2.5 mL) was cooled to 0 °C and treated with *n*-BuLi (0.1 mL, 0.12 mmol, 1.2 eq., 1.6 M in hexane). The mixture was stirred at 0 °C for 1 h and then a solution of (*R*)-**1g** (30 mg, 0.10 mmol, 1.0 eq.) in THF (1.0 mL) was added. The mixture was stirred at 0 °C for 1 h at which point <sup>11</sup>B NMR spectroscopy showed complete formation of the ‘ate’ complex [(<sup>11</sup>B NMR, 96 MHz, THF) δ<sub>B</sub> ~ 8 ppm]. The mixture was warmed to r.t. and the solvents were removed under high vacuum. The crude was re-dissolved in MeOH (2.0 mL) and the mixture was cooled to 0 °C. A solution of NBS (22 mg, 0.12 mmol, 1.2 eq.) in MeOH (3.0 mL) was added dropwise. After 1 h saturated aqueous solution of Na<sub>2</sub>S<sub>2</sub>O<sub>3</sub> (2 mL) was added. After 2 min. the reaction mixture was allowed to warm to r.t. The reaction mixture was diluted with EtOAc (10 mL) and washed with water (15 mL). The aqueous layer was extracted with EtOAc (2 x 15 mL), the combined organic layers were dried over MgSO<sub>4</sub>, filtered and concentrated under vacuum. Purification by flash column chromatography eluting with *n*-hexane:Et<sub>2</sub>O (98:2) gave (*S*)-**4g** (20 mg, 69%) was obtained as an oil; er (*S*:*R*) 99:1; *R*<sub>f</sub> 0.75 (pentane:Et<sub>2</sub>O 95:5); [α]<sub>D</sub><sup>23</sup> -25 (*c* 0.6, CHCl<sub>3</sub>); R (film): ν (cm<sup>-1</sup>) 2966, 2933, 1453, 1252, 1167, 884, 750, 738; <sup>1</sup>H NMR (400 MHz, CDCl<sub>3</sub>) δ ppm 7.53(m, 1H), 7.47 (m, 1H), 7.30–7.25 (m, 3H), 7.22 (m, 1H), 7.20–7.14

(m, 3H), 6.47 (d,  $J = 1$  Hz, 1H), 2.56 (dt,  $J = 13.1, 4.8$  Hz, 1H), 2.41 (dt,  $J = 13.1, 4.8$  Hz, 1H), 2.14 (dt,  $J = 13.1, 4.8$  Hz, 1H), 1.98–1.87 (m, 2H), 1.72 (dq,  $J = 13.1, 7.5$ , 1H), 1.41 (s, 3H), 0.84 (t,  $J = 7.5$  Hz, 3H);  $^{13}\text{C}$  NMR (100 MHz,  $\text{CDCl}_3$ )  $\delta$  ppm 164.6, 154.7, 142.8, 128.7, 128.3, 125.6, 123.1, 122.3, 120.3, 110.8, 102.2, 42.0, 40.0, 32.7, 30.9, 22.2, 8.6; HRMS (EI) calcd. for  $\text{C}_{20}\text{H}_{22}\text{O}$   $[M]^+$  278.1671 found 278.1675.

Resolution of the enantiomers of **4g** was achieved using a chiral HPLC system fitted with a Chiralpak OJ-RH column as the stationary phase with MeCN:water (7:3, v:v) as the mobile phase at a flow rate of  $0.5 \text{ mL min}^{-1}$  ( $T = 20 \text{ }^\circ\text{C}$ ). Injection volume:  $5 \text{ } \mu\text{L}$  of a  $2 \text{ g L}^{-1}$  solution of compound in the eluent. Under these conditions, the faster running component (*R*) and the slower running component (*S*) were eluted at 23.3 and 30.2 min., respectively, with a total analysis time of 35 min.

#### (*R*)-2-(2-phenylbutan-2-yl)benzofuran [(*R*)-**4h**]

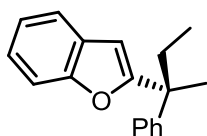

A solution of benzofuran ( $14 \text{ } \mu\text{L}$ ,  $0.12 \text{ mmol}$ ,  $1.2 \text{ eq.}$ ) in THF ( $1.0 \text{ mL}$ ) was cooled to  $0 \text{ }^\circ\text{C}$  and treated with *n*-BuLi ( $0.1 \text{ mL}$ ,  $0.12 \text{ mmol}$ ,  $1.2 \text{ eq.}$ ,  $1.6 \text{ M}$  in hexane). The mixture was stirred at  $0 \text{ }^\circ\text{C}$  for 1 h and then a solution of (*R*)-**1h** ( $26 \text{ mg}$ ,  $0.10 \text{ mmol}$ ,  $1.0 \text{ eq.}$ ) in THF ( $1.0 \text{ mL}$ ) was added. The mixture was stirred at  $0 \text{ }^\circ\text{C}$  for 1 h at which point  $^{11}\text{B}$  NMR spectroscopy showed complete formation of the ‘ate’ complex [ $^{11}\text{B}$  NMR,  $96 \text{ MHz}$ , THF)  $\delta_{\text{B}} \sim 8 \text{ ppm}$ ]. The mixture was warmed to r.t. and the solvents were removed under high vacuum. The crude was re-dissolved in MeOH ( $2 \text{ mL}$ ) and the mixture was cooled to  $0 \text{ }^\circ\text{C}$ . A solution of NBS ( $22 \text{ mg}$ ,  $0.12 \text{ mmol}$ ,  $1.2 \text{ eq.}$ ) in MeOH ( $2.0 \text{ mL}$ ) was added dropwise. After 1 h saturated aqueous solution of  $\text{Na}_2\text{S}_2\text{O}_3$  ( $2 \text{ mL}$ ) was added. After 2 min. the reaction mixture was allowed to warm to r.t. The reaction mixture was diluted with EtOAc ( $10 \text{ mL}$ ) and washed with water ( $15 \text{ mL}$ ). The aqueous layer was extracted with EtOAc ( $2 \times 15 \text{ mL}$ ), the combined organic layers were dried over  $\text{MgSO}_4$ , filtered and concentrated under vacuum. Purification by flash column chromatography eluting with *n*-hexane:Et<sub>2</sub>O (98:2) gave (*R*)-**4h** ( $16 \text{ mg}$ ,  $64\%$ ) as an oil; er (*R*:*S*) 99:1;  $R_{\text{f}}$  0.27 (pentane);  $[\alpha]_{\text{D}}^{23} 12$  ( $c 0.5$ ,  $\text{CHCl}_3$ ); IR (film):  $\nu$  ( $\text{cm}^{-1}$ ) 2970, 2950, 1578, 1498, 1453, 1301, 1250, 1168, 1028, 1006, 937, 798, 750, 738;  $^1\text{H}$  NMR ( $400 \text{ MHz}$ ,  $\text{CDCl}_3$ )  $\delta$  ppm 7.54 (m, 1H), 7.40 (m, 1H), 7.34–7.26 (m, 4H), 7.25–7.18 (m, 3H), 6.57 (d,  $J = 0.9$  Hz, 1H), 2.29 (dq,  $J = 13.7, 7.4$  Hz, 1H), 2.17 (dq,  $J = 13.7, 7.4$  Hz, 1H), 1.72 (s, 3H), 0.85 (t,  $J = 7.4$  Hz, 3H);  $^{13}\text{C}$  NMR (100 MHz,  $\text{CDCl}_3$ )  $\delta$  ppm 164.6, 154.7, 146.2, 128.5, 128.2, 126.6, 126.2, 123.3,

122.4, 120.4, 111.1, 102.7, 44.6, 32.8, 24.4, 9.0; HRMS (CI) calcd. for C<sub>18</sub>H<sub>19</sub>O [M+H]<sup>+</sup> 251.1436, found 251.1437.

Resolution of the enantiomers of **4h** was achieved using a chiral HPLC system fitted with a Chiracel OD-H column as the stationary phase with heptane:MTBE (95:5, v:v) as the mobile phase at a flow rate of 0.5 mL min<sup>-1</sup>. Injection volume: 2 μL of a 2 g L<sup>-1</sup> solution of compound in the eluent. Under these conditions, the faster running component (*R*) and the slower running component (*S*) were eluted at 16.7 and 20.8 min., respectively, with a total analysis time of 30 min.

### (*S*)-1,3-dimethoxy-5-(3-methyl-1-phenylpentan-3-yl)benzene [(*S*)-**9g**]

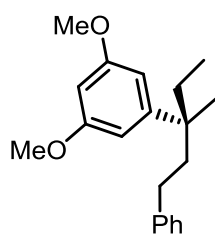

A solution of 3,5-(dimethoxy)bromobenzene (35 mg, 0.16 mmol, 1.3 eq.) in THF (2.5 mL) was cooled to -78 °C and treated with *t*-BuLi (0.17 mL, 0.32 mmol, 2.6 eq., 1.4 M in pentane). The mixture was stirred at -78 °C for 30 min. and then a solution of (*R*)-**1g** (36 mg, 0.125 mmol, 1.0 eq.) in THF (0.5 mL) was added. The mixture was stirred at -78 °C for 1 h and then warm to r.t. at which point <sup>11</sup>B NMR spectroscopy showed complete formation of the 'ate' complex [(<sup>11</sup>B NMR, 96 MHz, THF) δ<sub>B</sub> ~ 8 ppm]. The reaction mixture was stirred at -78 °C and a solution of NBS (27 mg, 0.15 mmol, 1.2 eq.) in MeOH (3.0 mL) was added dropwise and the mixture was warmed to r.t. After 1 h saturated aqueous solution of Na<sub>2</sub>S<sub>2</sub>O<sub>3</sub> (2 mL) was added. The reaction mixture was diluted with EtOAc (10 mL) and washed with water (15 mL). The aqueous layer was extracted with EtOAc (2 x 15 mL), the combined organic layers were dried over MgSO<sub>4</sub>, filtered and concentrated under vacuum. Purification by flash column chromatography eluting with *n*-pentane:Et<sub>2</sub>O (98:2) gave (*S*)-**9g** (28 mg, 78%) as an oil, er (*S*:*R*) 99:1; *R*<sub>f</sub> 0.38 (*n*-pentane:Et<sub>2</sub>O 95:5); [α]<sub>D</sub><sup>20</sup> -14 (*c* 0.5, CHCl<sub>3</sub>); IR (film): ν (cm<sup>-1</sup>) 2962, 2933, 1593, 1454, 1421, 1298, 1260, 1203, 1153, 1124, 1060, 925, 801, 746, 699; <sup>1</sup>H NMR (400 MHz, CDCl<sub>3</sub>) δ ppm 7.28–7.21 (m, 2H), 7.15 (tt, *J* = 7.4, 2.3 Hz, 1H), 7.12–7.08 (m, 2H), 6.51 (d, *J* = 2.2 Hz, 2H), 6.33 (t, *J* = 2.2 Hz, 1H), 3.81 (s, 6H), 2.46 (td, *J* = 13.1, 5.1 Hz, 1H), 2.27 (td, *J* = 13.0, 4.4 Hz, 1H), 1.97 (td, *J* = 13.1, 4.4 Hz, 1H), 1.87–1.68 (m, 2H), 1.67–1.55 (m, 1H), 1.33 (s, 3H), 0.72 (t, *J* = 7.4 Hz, 3H), <sup>13</sup>C NMR (100 MHz, CDCl<sub>3</sub>) δ ppm 160.5, 150.1, 143.2, 128.2, 125.5, 105.3, 96.7, 55.2, 45.2, 41.6, 35.7, 30.8, 23.2, 8.65.

Resolution of the enantiomers of **9g** was achieved using a chiral HPLC system fitted with a Chiracel IB column with guard as the stationary phase, *n*-hexane:*i*-PrOH (99.9:0.1 v:v) as the



mobile phase at a flow rate of 0.6 mL min<sup>-1</sup>. Injection volume: 2 μL of a 2 g L<sup>-1</sup> solution of compound in the eluent. Under these conditions, the faster running component (*R*) and the slower running component (*S*) were eluted at 22.3 and 25.0 min., respectively, with a total analysis time of 30 min.

**(*R*)-1,3-dimethoxy-5-(2-phenylbutan-2-yl)benzene [(*R*)-**9h**]**

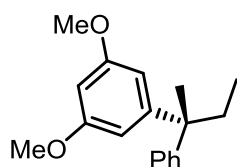

A solution of 3,5-(dimethoxy)bromobenzene (117 mg, 0.54 mmol, 1.3 eq.) in THF (5.0 mL) was cooled to -78 °C and treated with *t*-BuLi (0.5 mL, 1.08 mmol, 2.6 eq., 1.9 M in pentane). The mixture was stirred at -78 °C for 30 min. and then a solution of (*S*)-**1h** (70 mg, 0.27 mmol, 1.0 eq.) in THF (1.0 mL) was added. The mixture was stirred at -78 °C for 1 h at which point <sup>11</sup>B NMR spectroscopy showed complete formation of the ‘ate’ complex [(<sup>11</sup>B NMR, 96 MHz, THF) δ<sub>B</sub> ~ 8 ppm]. The mixture was warmed to r.t. and the solvents were removed under high vacuum. The crude was re-dissolved in MeOH (2.0 mL) and the mixture was cooled to -78 °C. A solution of DBDMH (1,3-dibromo-5,5-dimethylhydantoin) (176 mg, 0.61 mmol, 2.0 eq.) in MeOH (5.0 mL) was added dropwise. After 1 h reaction mixture was warmed to 70 °C and heated at this temperature for 3 h. The reaction mixture was cooled to r.t. and saturated aqueous solution of Na<sub>2</sub>S<sub>2</sub>O<sub>3</sub> (2 mL) was added. The reaction mixture was diluted with EtOAc (10 mL) and washed with water (15 mL). The aqueous layer was extracted with EtOAc (2 x 15 mL), the combined organic layers were dried over MgSO<sub>4</sub>, filtered and concentrated under vacuum. Purification by flash column chromatography eluting with *n*-hexane:Et<sub>2</sub>O (98:2) gave (*R*)-**9h** (73 mg, 63%) as an oil, er (*R*:*S*) >99:1; *R*<sub>f</sub> 0.51 (*n*-hexane:Et<sub>2</sub>O 95:5); [α]<sub>D</sub><sup>20</sup> -22.0 (*c* 1.0, CHCl<sub>3</sub>); IR (film): ν (cm<sup>-1</sup>) 2959, 2933, 2836, 1592, 1454, 1203, 1057, 831; <sup>1</sup>H NMR (400 MHz, CDCl<sub>3</sub>) δ ppm 7.27–7.13 (m, 5H), 6.35 (d, *J* = 2.2 Hz, 2H), 6.28 (t, *J* = 2.2 Hz, 1H), 3.72 (s, 6H), 2.10 (q, *J* = 7.4 Hz, 1H), 1.56 (s, 3H) 0.72 (t, *J* = 7.4 Hz, 2H); <sup>13</sup>C NMR (100 MHz, CDCl<sub>3</sub>) δ ppm 160.2, 152.2, 149.3, 127.8, 127.2, 125.5, 106.3, 96.8, 55.1, 46.7, 33.9, 26.8, 9.1; HRMS (ESI) calcd. for C<sub>18</sub>H<sub>23</sub>O<sub>2</sub> [*M*+H]<sup>+</sup> 271.1694, found 271.1693.

Resolution of the enantiomers of **9h** was achieved using a chiral HPLC system fitted with a Chiracel OD-H column as the stationary phase with *n*-hexane:*i*-Pr (99.5:0.5 v:v) as the mobile phase at a flow rate of 0.5 mL min<sup>-1</sup>. Injection volume: 20 μL of a 2 g L<sup>-1</sup> solution of compound in the eluent. Under these conditions, the faster running component (*R*) and the

slower running component (*S*) were eluted at 9.4 and 10.9 min., respectively, with a total analysis time of 30 min.

**(*R*)-1-methoxy-3-(2-phenylbutan-2-yl)benzene [(*R*)-**11h**]**

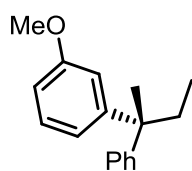

A solution of 3-methoxybromobenzene (43  $\mu$ L, 0.34 mmol, 1.1 eq.) in THF (2.0 mL) was cooled to  $-78$   $^{\circ}$ C and treated with *t*-BuLi (0.42 mL, 0.68 mmol, 2.2 eq., 1.7 M in hexanes). The mixture was stirred at  $-78$   $^{\circ}$ C for 1 h and then a solution of (*S*)-**1h** (80 mg, 0.31 mmol, 1.0 eq.) in THF (1.0 mL) was added. The mixture was stirred at  $-78$   $^{\circ}$ C for 1 h at which point  $^{11}$ B NMR spectroscopy showed complete formation of the ‘ate’ complex [ $^{11}$ B NMR, 96 MHz, THF)  $\delta_B \sim 8$  ppm]. The mixture was warmed to r.t. and the solvents were removed under high vacuum. The crude was re-dissolved in MeOH (2.0 mL) and the mixture was cooled to  $-78$   $^{\circ}$ C. A solution of DBDMH (176 mg, 0.61 mmol, 2.0 eq.) in MeOH (3.0 mL) was added dropwise. After 1 h saturated aqueous solution of  $\text{Na}_2\text{S}_2\text{O}_3$  (2 mL) was added. After 2 min. the reaction mixture was allowed to warm to r.t. The reaction mixture was diluted with EtOAc (10 mL) and washed with water (5 mL). The aqueous layer was extracted with EtOAc (2 x 15 mL), the combined organic layers were dried over  $\text{MgSO}_4$ , filtered and concentrated under vacuum. Purification by flash column chromatography (*n*-hexane:Et<sub>2</sub>O 98:2) gave (*R*)-**11h** (34 mg, 47%) as an oil; er (*R*:*S*) 99:1;  $R_f$  0.50 (pentane:Et<sub>2</sub>O 95:5);  $[\alpha]_D^{21}$  43 (*c* 0.1,  $\text{CHCl}_3$ ); IR (film):  $\nu$  ( $\text{cm}^{-1}$ ) 2968, 2936, 1598, 1580, 1253, 774, 762, 698;  $^1\text{H}$  NMR (400 MHz,  $\text{CDCl}_3$ )  $\delta$  ppm 7.30-7.24 (m, 2H), 7.22-7.14 (m, 4H), 6.80-6.76 (m, 2H), 6.73 (ddd,  $J = 8.1, 2.4, 0.9$  Hz, 1H), 3.77 (s, 3H), 2.13 (q,  $J = 7.4$  Hz, 2H), 1.61 (s, 3H), 0.75 (t,  $J = 7.4$  Hz, 3H);  $^{13}\text{C}$  NMR (100 MHz,  $\text{CDCl}_3$ )  $\delta$  ppm 159.2, 151.4, 149.5, 128.7, 127.8, 127.3, 125.5, 120.2, 114.1, 110.0, 55.1, 46.5, 34.0, 26.8, 9.2; HRMS (EI) calcd. for  $\text{C}_{17}\text{H}_{20}\text{O}$  [ $M$ ]<sup>+</sup> 240.1514, found 240.1516.

Resolution of the enantiomers of **11h** was achieved using a chiral SFC system fitted with a Chiracel IB column as the stationary phase with  $\text{CO}_2$ :*n*-hexane as the mobile phase at a flow rate of 4.0 mL min<sup>-1</sup> ( $P = 125$  bar). Injection volume: 10  $\mu$ L of a 2 g L<sup>-1</sup> solution of the eluent. Under these conditions, the faster running component (*S*) and the slower running component (*R*) were eluted at 3.7 and 4.3 min., respectively, with a total analysis time of 10 min.

### (S)-1-(3-Methyl-1-phenylpentan-3-yl)naphthalene [(S)-**15g**]

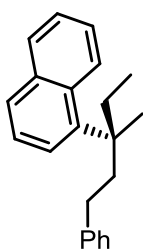

A solution of 1-bromonaphthalene (28  $\mu\text{L}$ , 0.16 mmol, 1.2 eq.) in  $\text{Et}_2\text{O}$  (1.0 mL) was cooled to 0  $^\circ\text{C}$  and *n*-BuLi (0.1 mL, 0.16 mmol, 1.2 eq., 1.6 M in hexanes) was added dropwise. The mixture was stirred at 0  $^\circ\text{C}$  for 1 h. (*R*)-**1g** (36 mg, 0.125 mmol, 1.0 eq.) was added as a solution in  $\text{Et}_2\text{O}$  (0.5 mL) and the reaction was stirred at the same temperature for 1 h at which point  $^{11}\text{B}$  NMR spectroscopy showed complete formation of the boron-ate complex [ $^{11}\text{B}$  NMR, 96 MHz)  $\delta_{\text{B}} \sim 8$  ppm]. The mixture was warmed to r.t. and the solvents were removed under high vacuum. The crude was re-dissolved in MeOH (2 mL) and the mixture was cooled to  $-78$   $^\circ\text{C}$ . A solution of NBS (53 mg, 0.32 mmol, 2.4 eq.) in MeOH (3.0 mL) was added dropwise. After 1 h the reaction mixture was diluted with pentane (15 mL) and washed with water (15 mL). The aqueous layer was extracted with pentane (2 x 15 mL) and the combined organic layers were dried over  $\text{MgSO}_4$ , filtered and concentrated under vacuum. The residue was dissolved in 2,2,2-trifluoroethanol (3.0 mL) and *p*-toluenesulfonic acid (49 mg, 0.26 mmol, 2.5 eq.) was added. The reaction mixture was heated under reflux for 3 h. The reaction was cooled to r.t. and saturated aqueous solution of  $\text{NaHCO}_3$  (2 mL) was added. The reaction mixture was diluted with EtOAc (10 mL) and washed with water (5 mL). The aqueous layer was extracted with EtOAc (2 x 15 mL), the combined organic layers were dried over  $\text{MgSO}_4$ , filtered and concentrated under vacuum. Purification by flash column chromatography eluting with pentane gave (*S*)-**15g** (27 mg, 75%) as an oil; er (*S*:*R*) 99:1;  $R_f$  0.17 (pentane);  $[\alpha]_{\text{D}}^{21} +1$  (*c* 0.5,  $\text{CHCl}_3$ ); IR (film):  $\nu$  ( $\text{cm}^{-1}$ ); 3048, 3025, 2966, 2932, 2876, 1601, 1510, 1496, 1454, 1397, 1380, 1279, 1030, 800, 777, 748, 698, 573, 497;  $^1\text{H}$  NMR (400 MHz,  $\text{CDCl}_3$ )  $\delta$  ppm 8.50 (m, 1H), 7.89 (m, 1H), 7.75 (d,  $J = 7.7$  Hz, 1H), 7.54–7.34 (m, 4H), 7.19 (tt,  $J = 7.5$ , 1.5 Hz, 2H), 7.11 (tt,  $J = 7.3$ , 2.1, 1H), 7.02–6.92 (m, 2H), 2.75–2.62 (m, 1H), 2.49–2.34 (m, 2H), 2.10–1.96 (m, 2H), 1.88 (dq,  $J = 13.8$ , 7.4 Hz, 1H), 1.63 (s, 3H), 0.65 (t,  $J = 7.5$  Hz, 3H);  $^{13}\text{C}$  NMR (100 MHz,  $\text{CDCl}_3$ )  $\delta$  ppm 143.2, 142.0, 134.9, 132.2, 129.7, 128.2, 128.1, 127.6, 126.5, 125.8, 125.5, 125.0, 124.9, 44.4, 43.7, 34.5, 31.4, 27.1, 9.0.

Resolution of the enantiomers of **15g** was achieved using chiral HPLC system fitted with a Chiracel IB column with guard as the stationary phase with *n*-hexane:*i*-PrOH (99.9:0.1, v:v) as the mobile phase at a flow rate of 0.5 mL  $\text{min}^{-1}$  ( $T = 0$   $^\circ\text{C}$ ). Injection volume: 2  $\mu\text{L}$  of a 2 g  $\text{L}^{-1}$  solution of compound in the eluent. Under these conditions, the faster running component (*S*) and the slower running component (*R*) major were eluted at 16.1 min and 17.0 min., respectively, with a total analysis time of 30 min.

**(S)-2-(3-methyl-1-phenylpentan-3-yl)naphthalene [(S)-16g]**

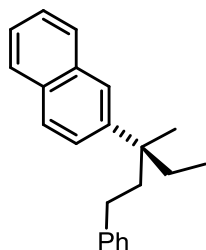

A solution of 1-bromonaphthalene (32 mg, 0.16 mmol, 1.5 eq.) in Et<sub>2</sub>O (1.0 mL) was cooled to -15 °C and *n*-BuLi (0.1 mL, 0.16 mmol, 1.5 eq., 1.6 M in hexanes) was added dropwise. The mixture was stirred at -15 °C for 30 min. (*R*)-**1g** (30 mg, 0.1 mmol, 1.0 eq.) was added as a solution in Et<sub>2</sub>O (0.5 mL) and the reaction was stirred at the same temperature for 1 h at which point <sup>11</sup>B NMR spectroscopy showed complete formation of the boron-ate complex [<sup>11</sup>B NMR, 96 MHz) δ<sub>B</sub> ~ 8 ppm]. The mixture was warmed to r.t. and the solvents were removed under high vacuum. The crude was re-dissolved in MeOH (2 mL) and the mixture was cooled to -15 °C. A solution of NBS (37 mg, 0.21 mmol, 2.0 eq.) in MeOH (3.0 mL) was added dropwise. After 1 h the reaction mixture was diluted with pentane (15 mL) and washed with water (15 mL). The aqueous layer was extracted with pentane (2 x 15 mL) and the combined organic layers were dried over MgSO<sub>4</sub>, filtered and concentrated under vacuum. The residue was dissolved in 2,2,2-trifluoroethanol (3.0 mL) and *p*-toluenesulfonic acid (49 mg, 0.26 mmol, 2.5 eq.) was added. The reaction mixture was heated under reflux for 3 h. The reaction was cooled to r.t. and saturated aqueous solution of Na<sub>2</sub>S<sub>2</sub>O<sub>3</sub> (2 mL) was added. The reaction mixture was diluted with EtOAc (10 mL) and washed with water (5 mL). The aqueous layer was extracted with EtOAc (2 x 15 mL), the combined organic layers were dried over MgSO<sub>4</sub>, filtered and concentrated under vacuum. Purification by flash column chromatography eluting with pentane gave (*S*)-**16g** (14 mg, 49%) as an oil; er (*S*:*R*) 95:5; *R*<sub>f</sub> 0.87 (petrol:Et<sub>2</sub>O 95:5); [α]<sub>D</sub><sup>23</sup> - 2 (c 0.4, CHCl<sub>3</sub>) IR (film): ν (cm<sup>-1</sup>) 2963, 2925, 1454, 1380, 816, 744, 699; <sup>1</sup>H NMR (400 MHz, CDCl<sub>3</sub>) δ ppm 7.87–7.80 (m, 3H), 7.73 (br d, *J* = 2.0 Hz, 1H), 7.53 (dd, *J* = 8.7, 2.0 Hz, 1H), 7.50–7.41 (m, 2H), 7.26–7.20 (m, 2H), 7.14 (m, 1H), 7.10–7.05 (m, 2H), 2.47 (dt, *J* = 13.0, 4.5 Hz, 1H), 2.22 (dt, *J* = 13.0, 4.5 Hz, 1H), 2.12 (dt, *J* = 13.0, 4.5 Hz, 1H), 1.98–1.84 (m, 2H), 1.71 (dq, *J* = 13.0, 7.4 Hz, 1H), 1.47 (s, 3H), 0.72 (t, *J* = 7.4 Hz, 3H). <sup>13</sup>C NMR (100 MHz, CDCl<sub>3</sub>) δ ppm 144.8, 143.2, 133.4, 131.7, 128.2, 128.2, 127.9, 127.7, 127.3, 125.7, 125.5, 125.3, 125.2, 125.0, 45.1, 41.5, 35.5, 31.0, 23.2, 8.7; HRMS (EI) calcd. for C<sub>22</sub>H<sub>24</sub> [*M*] 288.1878, found 288.1883.

**(S)-1,3-dimethyl-5-(3-methyl-1-phenylpentan-3-yl)benzene [(S)-18g]**

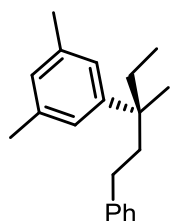

A solution of 3,5-dimethylbromobenzene (22 μL, 0.16 mmol, 1.2 eq.) in THF (1.0 mL) was cooled to -78 °C and treated with *t*-BuLi (0.19 mL, 0.32 mmol, 2.4 eq., 1.6 M in hexanes). The mixture was stirred at -78 °C for 1 h and then

a solution of (*R*)-**1g** (36 mg, 0.125 mmol, 1.0 eq.) in THF (0.5 mL) was added. The mixture was stirred at  $-78\text{ }^{\circ}\text{C}$  for 1 h at which point  $^{11}\text{B}$  NMR spectroscopy showed complete formation of the ‘ate’ complex [ $(^{11}\text{B}$  NMR, 96 MHz, THF)  $\delta_{\text{B}} \sim 8$  ppm]. The mixture was warmed to r.t. and the solvents were removed under high vacuum. The crude was redissolved in MeOH (2.0 mL) and the mixture was cooled to  $-78\text{ }^{\circ}\text{C}$ . A solution of NBS (53 mg, 0.32 mmol, 2.4 eq.) in MeOH (3.0 mL) was added dropwise and the reaction mixture was warmed to r.t. After 1 h  $\text{Na}_2\text{S}_2\text{O}_3\text{sat}$  (2 mL) was added. The reaction mixture was diluted with EtOAc (10 mL) and washed with water (5 mL). The aqueous layer was extracted with EtOAc (2 x 15 mL), the combined organic layers were dried ( $\text{MgSO}_4$ ), filtered and concentrated under vacuum. Purification by flash column chromatography eluting with pentane gave (*S*)-**18g** (22 mg, 66%) as an oil; er (*S*:*R*) 99:1;  $R_{\text{f}}$  0.32 (pentane);  $[\alpha]_{\text{D}}^{21} -11$  ( $c$  0.65,  $\text{CHCl}_3$ ) IR (film):  $\nu$  ( $\text{cm}^{-1}$ ) 3026, 2965, 2920, 2877, 1603, 1496, 1454, 1377, 1031, 847, 707, 698, 502;  $^1\text{H}$  NMR (400 MHz,  $\text{CDCl}_3$ )  $\delta$  ppm 7.30–7.22 (m, 2H), 7.21–7.08 (m, 3H), 6.97–6.92 (m, 2H), 6.84 (m, 1H), 2.52–2.22 (m, 2H), 2.32 (s, 6H), 1.99 (td,  $J = 13.1, 4.4$  Hz, 1H), 1.88–1.70 (m, 2H), 1.61 (m, 1H), 1.33 (s, 3H), 0.72 (t,  $J = 7.4$  Hz, 3H);  $^{13}\text{C}$  NMR (100 MHz,  $\text{CDCl}_3$ )  $\delta$  ppm 147.4, 143.4, 137.2, 128.4, 128.2, 127.0, 125.5, 124.3, 44.9, 40.9, 35.5, 30.9, 23.5, 21.6; HRMS (EI) calcd. for  $\text{C}_{20}\text{H}_{26}$   $[M]^+$  266.2035, found 266.2027.

The enantiomers of **18g** could not be separated by either chiral GC, HPLC and SFC. In order to evaluate the enantiomeric ratio of the reaction product we separated the enantiomers of the B(pin)-incorporated reaction by-product **18ga** (< 10%). This compound is formed due to preferential B(pin) migration over elimination after the key 1,2-metalate rearrangement. Thus its enantioerichment reflects the one of **18g**.

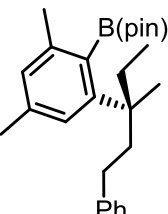 (*S*)-**18ga**:  $R_{\text{f}}$  0.3 (pentane:Et<sub>2</sub>O 95:5); IR (film):  $\nu$  ( $\text{cm}^{-1}$ ) 2975, 2927, 1607, 1453, 1372, 1324, 1295, 1141, 1059, 855, 699, 684, 745;  $^1\text{H}$  NMR (400 MHz,  $\text{CDCl}_3$ )  $\delta$  ppm 7.24–7.14 (m, 4H), 7.11 (tt,  $J = 7.1, 1.6$ , 1H), 6.97–6.91 (m, 1H), 6.80 (dt,  $J = 1.4, 0.7$  Hz, 1H), 2.45–2.08 (m, 3H), 2.39 (s, 3H), 2.28 (s, 3H), 1.91 (dq,  $J = 14.6, 7.4$  Hz, 1H), 1.83–1.70 (m, 1H), 1.63 (dq,  $J = 13.5, 7.3$  Hz, 1H), 1.41 (s, 3H), 1.38 (s, 6H), 1.36 (s, 6H), 0.70 (t,  $J = 7.3$  Hz, 3H);  $^{13}\text{C}$  NMR (100 MHz,  $\text{CDCl}_3$ )  $\delta$  ppm 147.4, 143.4, 137.2, 128.4, 128.2, 127.0, 125.5, 124.3, 44.9, 40.9, 35.5, 30.9, 23.5, 21.6;  $^{11}\text{B}$  NMR (96 MHz,  $\text{CDCl}_3$ )  $\delta$  31.2 ppm; HRMS (ESI) calcd. for  $\text{C}_{26}\text{H}_{37}\text{BO}_2$   $[M+\text{H}]^+$  393.2964, found 393.2949,  $[M+\text{Na}]^+$  415.2783, found 415.2766.

Resolution of the enantiomers of **18ga** was achieved using a chiral SFC system fitted with a Chiralcel Whelk-01 column as the stationary phase with  $\text{CO}_2$ :n-hexane as the mobile phase at

a flow rate of 2.0 mL min<sup>-1</sup> ( $P = 125$  bar). Injection volume: 20  $\mu$ L of a 2 g L<sup>-1</sup> solution of compound in the eluent. Under these conditions, the faster running component (*S*) and the slower running component (*R*) were eluted at 18.0 and 19.0 min., respectively, with an analysis time of 25 min.

### 1,3-dimethyl-5-(2-phenylbutan-2-yl)benzene (**18h**)

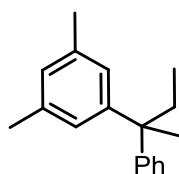

A solution of 3,5-dimethylbromobenzene (115  $\mu$ L, 0.85 mmol, 1.1 eq.) in THF (3.0 mL) was cooled to  $-78$  °C and treated with *t*-BuLi (1.0 mL, 1.69 mmol, 2.2 eq., 1.7 M in hexanes). The mixture was stirred at  $-78$  °C for 1 h and then a solution of **1h** (200 mg, 1.54 mmol, 1.0 eq.) in THF (2.0 mL) was added. The mixture was stirred at  $-78$  °C for 1 h at which point <sup>11</sup>B NMR spectroscopy showed complete formation of the ‘ate’ complex [(<sup>11</sup>B NMR, 96 MHz, THF)  $\delta_B \sim 8$  ppm]. The mixture was warmed to r.t. and the solvents were removed under high vacuum. The crude was re-dissolved in MeOH (5.0 mL) and the mixture was cooled to  $-78$  °C. A solution of NBS (274 mg, 1.92 mmol, 2.0 eq.) in MeOH (5.0 mL) was added dropwise and the reaction mixture was warmed to r.t. After 1 h the reaction mixture was diluted with pentane (15 mL) and washed with water (15 mL). The aqueous layer was extracted with pentane (2 x 15 mL) and the combined organic layers were dried over MgSO<sub>4</sub>, filtered and concentrated under vacuum. The residue was dissolved in 2,2,2-trifluoroethanol (5.0 mL) and *p*-toluenesulfonic acid (366 mg, 1.92 mmol, 2.5 eq.) was added. The reaction mixture was heated under reflux for 3 h. The reaction was cooled to r.t. and saturated aqueous solution of NaHCO<sub>3</sub> (2 mL) was added. The reaction mixture was diluted with EtOAc (10 mL) and washed with water (5 mL). The aqueous layer was extracted with EtOAc (2 x 15 mL), the combined organic layers were dried over MgSO<sub>4</sub>, filtered and concentrated under vacuum. Purification by flash column chromatography eluting with pentane gave **18h** (43 mg, 24%) as an oil;  $R_f$  0.17 (pentane); IR (film):  $\nu$  (cm<sup>-1</sup>) 2967, 2922, 2877, 1599, 1494, 1445, 765, 698; <sup>1</sup>H NMR (300 MHz, CDCl<sub>3</sub>)  $\delta$  ppm 7.34–7.13 (m, 5H), 6.83 (s, 3H), 2.28 (s, 6H), 2.14 (q,  $J = 7.3$  Hz, 2H), 1.60 (s, 3H), 0.75 (d,  $J = 7.3$  Hz, 3H); <sup>13</sup>C NMR (76 MHz, CDCl<sub>3</sub>)  $\delta$  ppm 149.8, 149.6, 137.0, 127.8, 127.4, 127.2, 125.3, 125.3, 46.3, 34.0, 26.9, 21.5, 9.2; HRMS (EI) calcd. for C<sub>18</sub>H<sub>22</sub> [ $M$ ]<sup>+</sup> 238.1722, found 238.1714.

**(S)-1-methyl-3-(3-methyl-1-phenylpentan-3-yl)benzene [(S)-19g]**

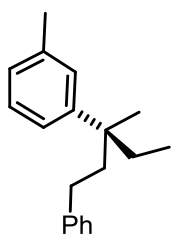

A solution of 3-bromotoluene (14  $\mu\text{L}$ , 0.12 mmol, 1.1 eq.) in THF (0.5 mL) was cooled to  $-78\text{ }^\circ\text{C}$  and treated with *t*-BuLi (0.13 mL, 0.23 mmol, 2.2 eq., 1.7 M in pentane). The mixture was stirred at  $-78\text{ }^\circ\text{C}$  for 1 h and then a solution of (*R*)-**1g** (30 mg, 0.1 mmol, 1.0 eq.) in THF (1.0 mL) was added. The mixture was stirred at  $-78\text{ }^\circ\text{C}$  for 1 h at which point  $^{11}\text{B}$  NMR spectroscopy showed complete formation of the ‘ate’ complex [ $^{11}\text{B}$  NMR, 96 MHz, THF)  $\delta_{\text{B}} \sim 8$  ppm]. The mixture was warmed to r.t. and the solvents were removed under high vacuum. The crude was re-dissolved in MeOH (2.0 mL) and the mixture was cooled to  $-78\text{ }^\circ\text{C}$ . A solution of NBS (44 mg, 0.25 mmol, 2.4 eq.) in MeOH (2.0 mL) was added dropwise. After 1 h the reaction mixture was diluted with pentane (15 mL) and washed with water (15 mL). The aqueous layer was extracted with pentane (2 x 15 mL) and the combined organic layers were dried ( $\text{MgSO}_4$ ), filtered and concentrated under vacuum. The residue was dissolved in 2,2,2-trifluoroethanol (3.0 mL) and *p*-toluenesulfonic acid (49 mg, 0.26 mmol, 2.5 eq.) was added. The reaction mixture was heated under reflux for 3 h. The reaction was cooled to r.t. and saturated aqueous solution of  $\text{NaHCO}_3$  (2 mL) was added. The reaction mixture was diluted with EtOAc (15 mL) and washed with water (15 mL). The aqueous layer was extracted with EtOAc (2 x 15 mL), the combined organic layers were dried over  $\text{MgSO}_4$ , filtered and concentrated under vacuum. Purification by flash column chromatography on silica gel eluting with pentane:Et<sub>2</sub>O (95:5), gave (0.10 mmol scale), (*S*)-**19g** (12 mg, 46%) as an oil; er (*S*:*R*) 99:1;  $R_{\text{f}}$  0.86 (petrol:Et<sub>2</sub>O 97.5:2.5);  $[\alpha]_{\text{D}}^{23} - 1$  (*c* 0.3,  $\text{CHCl}_3$ ); IR (film):  $\nu$  ( $\text{cm}^{-1}$ ) 3026, 2964, 2926, 1604, 1496, 1454, 705, 699;  $^1\text{H}$  NMR (400 MHz,  $\text{CDCl}_3$ )  $\delta$  ppm 7.27–7.19 (m, 3H), 7.18–7.07 (m, 5H), 7.01 (d,  $J = 7.3$  Hz, 1H), 2.44 (dt,  $J = 13.1$  Hz, 1H), 2.37 (s, 3H), 2.26 (dt,  $J = 12.9, 4.3$  Hz, 1H), 2.01 (dt,  $J = 13.1, 4.3$  Hz, 1H), 1.83 (dt,  $J = 12.9, 5.0$  Hz, 1H), 1.77 (dq,  $J = 14.7, 7.3$  Hz, 1H), 1.61 (dq,  $J = 14.7, 7.3$  Hz, 1H), 1.35 (s, 3H), 0.71 (t,  $J = 7.3$  Hz, 3H);  $^{13}\text{C}$  NMR (100 MHz,  $\text{CDCl}_3$ )  $\delta$  ppm 147.3, 143.3, 137.4, 128.2, 127.9, 127.2, 126.1, 125.5, 123.5, 45.1, 41.1, 35.6, 30.9, 23.4, 21.8, 8.7; HRMS (EI) calcd. for  $\text{C}_{19}\text{H}_{24}$  [ $M$ ]<sup>+</sup> 252.1878, found 252.1876.

Resolution of the enantiomers of **19g** was achieved using a chiral HPLC system fitted with a Chirapak IB column as the stationary phase with *n*-heptane as the mobile phase at a flow rate of  $0.5\text{ mL min}^{-1}$ . Injection volume: 2  $\mu\text{L}$  of a 2 g  $\text{L}^{-1}$  solution of the eluent. Under these

conditions, the faster running component (*S*) and the slower running component (*R*) were eluted at 12.4 and 12.8 min., respectively, with a total analysis time of 20 min.

**(*S*)-2-methoxy-6-(3-methyl-1-phenylpentan-3-yl)pyridine [(*S*)-**20g**]**

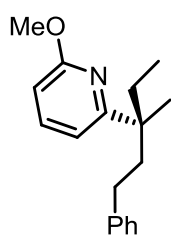

A solution of 2-bromo-6-methoxypyridine (0.17  $\mu\text{L}$ , 0.14 mmol, 1.3 eq.) in THF:Et<sub>2</sub>O:pentane (4:1:1, 0.3 M) was cooled to  $-78\text{ }^{\circ}\text{C}$  and treated with *n*-BuLi (0.2 mL, 0.14 mmol, 1.3 eq., 1.6 M in hexanes) and the mixture was stirred at this temperature for 30 min. (*R*)-**1g** (30 mg, 0.1 mmol, 1.0 eq.) was added dropwise as a solution in THF (0.5 mL). The mixture was stirred at  $-78\text{ }^{\circ}\text{C}$  for 30 min at which point <sup>11</sup>B NMR spectroscopy showed complete formation of the ‘ate’ complex [<sup>11</sup>B NMR (96 MHz, THF)  $\delta_{\text{B}} \sim 8$  ppm]. The mixture was warmed to r.t. and the solvents were removed under high vacuum. The crude was re-dissolved in MeOH (2 mL) and the mixture was cooled to  $0\text{ }^{\circ}\text{C}$ . A solution of DBDMH (74 mg, 0.26 mmol, 2.0 eq.) in MeOH (3.0 mL) was added dropwise. After 1 h at  $0\text{ }^{\circ}\text{C}$  saturated aqueous solution of Na<sub>2</sub>S<sub>2</sub>O<sub>3</sub> was added and the reaction mixture was allowed to warm to room temperature. The reaction mixture was diluted with EtOAc (15 mL) and water (15 mL). The layers were separated and the aqueous layer was extracted with EtOAc (2 x 15 mL). The combined organic layers were dried over MgSO<sub>4</sub>, filtered and concentrated under vacuum. The crude material was adsorbed on silica and purified by flash column chromatography on silica gel eluting with *n*-hexane to give (0.10 mmol scale), (*S*)-**20g** (17 mg, 60%) as an oil; er (*S*:*R*) 99:1; *R*<sub>f</sub> 0.59 (pentane:Et<sub>2</sub>O 97.5:2.5); [ $\alpha$ ]<sub>D</sub><sup>23</sup> -1 (*c* 1.5, CHCl<sub>3</sub>); IR (film):  $\nu$  (cm<sup>-1</sup>) 2964, 2926, 1580, 1461, 1408, 1256, 1029, 801, 742, 698; <sup>1</sup>H NMR (400 MHz, CDCl<sub>3</sub>)  $\delta$  ppm 7.52 (t, *J* = 7.7 Hz, 1H), 7.28–7.22 (m, 2H), 7.19–7.10 (m, 3H), 6.86 (d, *J* = 7.7 Hz, 1H), 6.56 (d, *J* = 7.7 Hz, 1H), 3.94 (s, 3H), 2.47 (dt, *J* = 12.8, 3.8 Hz, 1H), 2.30–2.18 (m, 2H), 1.92 (m, 1H), 1.85 (dt, *J* = 12.8, 3.8 Hz, 1H), 1.65 (m, 1H), 1.37 (s, 3H) 0.73 (t, *J* = 7.5 Hz, 3H); <sup>13</sup>C NMR (100 MHz, CDCl<sub>3</sub>)  $\delta$  ppm 164.6, 162.9, 143.5, 138.3, 128.2, 128.2, 125.4, 113.5, 107.1, 53.0, 43.8, 43.6, 34.4, 31.0, 22.4, 8.7; HRMS (ESI) calcd. for C<sub>18</sub>H<sub>24</sub>NO [*M*+H]<sup>+</sup> 270.1852, found 270.1842.

Resolution of the enantiomers of **20g** was achieved using a chiral HPLC system fitted with a Chiralpak IB column with guard as the stationary phase with [*n*-heptane:MTBE (98:2, v:v)] as the mobile phase at a flow rate of 0.5 mL min<sup>-1</sup> (*T* =  $0\text{ }^{\circ}\text{C}$ ). Injection volume: 2  $\mu\text{L}$  of a 2 g L<sup>-1</sup> solution of compound in the eluent. Under these conditions, the faster running component



(*S*) and the slower running component (*R*) were eluted at 11.3 and 11.8 min., respectively, with a total analysis time of 30 min.

## 8. Reaction products – B(pin) incorporation

### (*S*)-2-(2,4-dimethoxy-6-(4-(4-methoxyphenyl)butan-2-yl)phenyl)-4,4,5,5-tetramethyl-1,3,2-dioxaborolane [(*S*)-**9ba**]

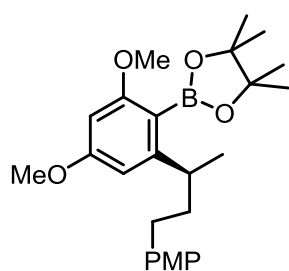

A solution of 3,5-(dimethoxy)bromobenzene (65 mg, 0.30 mmol, 1.2 eq.) in THF (2.0 mL) was cooled to  $-78\text{ }^{\circ}\text{C}$  and treated with *t*-BuLi (0.35 mL, 0.60 mmol, 2.4 eq., 1.7 M in pentane). The mixture was stirred at  $-78\text{ }^{\circ}\text{C}$  for 30 min and then a solution of (*S*)-**1b** (72 mg, 0.25 mmol, 1.0 eq.) in THF (1.0 mL) was added. The mixture was stirred at  $-78\text{ }^{\circ}\text{C}$  for 1 h at which point  $^{11}\text{B}$  NMR spectroscopy showed complete formation of the ‘ate’ complex [ $^{11}\text{B}$  NMR, 96 MHz, THF)  $\delta_{\text{B}} \sim 8$  ppm]. The mixture was warmed to r.t. and the solvents were removed under high vacuum. The crude was re-dissolved in MeCN:*i*-PrOH (1:1, 2 mL) and the mixture was cooled to  $0\text{ }^{\circ}\text{C}$ . A solution of NBS (45 mg, 0.25 mmol, 1.0 eq.) in MeCN (1.0 mL) was added dropwise. After 1 h saturated aqueous solution of  $\text{Na}_2\text{S}_2\text{O}_3$  (2 mL) was added. After 2 min. the reaction mixture was allowed to warm up to r.t. The reaction mixture was diluted with EtOAc (10 mL) and washed with water (15 mL). The aqueous layer was extracted with EtOAc (2 x 15 mL), the combined organic layers were dried  $\text{MgSO}_4$ , filtered and concentrated under vacuum. Purification by flash column chromatography eluting with *n*-hexane:EtOAc (95:5) gave (*S*)-**9ba** (41 mg, 38%) as an oil; er (*S*:*R*) 95:5;  $R_f$  0.22 (petrol:Et<sub>2</sub>O 90:10);  $[\alpha]_{\text{D}}^{25} - 25$  (*c* 0.8,  $\text{CHCl}_3$ ); IR (film):  $\nu$  ( $\text{cm}^{-1}$ ) 2961, 2928, 2852, 1601, 1511, 1330, 1243, 1199, 1142, 1034, 857, 829, 698;  $^1\text{H}$  NMR (400 MHz,  $\text{CDCl}_3$ )  $\delta$  ppm; 7.10–7.05 (m, 2H), 6.83–6.78 (m, 2H), 6.39 (d,  $J = 2.0$  Hz, 1H), 6.25 (d,  $J = 2.0$  Hz, 1H), 3.80 (s, 3H), 3.78 (s, 3H), 3.76 (s, 3H), 2.76 (sx,  $J = 6.9$  Hz, 1H), 2.60–2.40 (m, 2H), 1.96 (m, 1H), 1.87 (m, 1H), 1.35 (s, 6H), 1.34 (s, 6H), 1.26 (d,  $J = 6.9$  Hz, 3H);  $^{13}\text{C}$  NMR (100 MHz,  $\text{CDCl}_3$ )  $\delta$  ppm 163.9, 162.1, 157.5, 153.6, 134.9, 129.2, 113.6, 102.2, 95.0, 83.53, 55.4, 55.2, 55.1, 39.8, 39.7, 33.1, 29.7, 24.8, 24.6, 22.6;  $^{11}\text{B}$  NMR (96 MHz, NONE)  $\delta$  ppm 31.7; HRMS (EI) calcd. for  $\text{C}_{25}\text{H}_{33}\text{BO}_5$  [ $M$ ]<sup>+</sup> 426.2578, found 426.2563.

Resolution of the enantiomers of **9ba** was achieved using a chiral SFC system fitted with a Chiralcel IA column as the stationary phase with  $\text{CO}_2$ : [*n*-hexane:*i*-PrOH (9:1, v:v)] as the

mobile phase at a flow rate of 4.0 mL min<sup>-1</sup> ( $P = 125$  bar). Injection volume: 20  $\mu$ L of a 2 g L<sup>-1</sup> solution of the eluent. Under these conditions, the faster running component (*S*) and the slower running component (*R*) were eluted at 5.2 and 7.8 min., respectively, with a total analysis time of 15 min.

**(*S*)-2-(4-methoxy-2-(4-(4-methoxyphenyl)butan-2-yl)phenyl)-4,4,5,5-tetramethyl-1,3,2-dioxaborolane [(*S*)-11ba-major]**

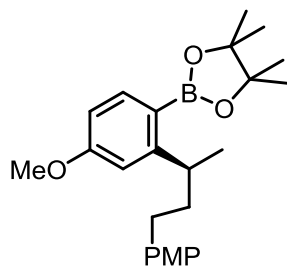

A solution of 3-bromoanisole (56 mg, 0.30 mmol, 1.2 eq.) in THF (2.5 mL) was cooled to  $-78$  °C and treated with *t*-BuLi (0.35 mL, 0.60 mmol, 2.4 eq., 1.7 M in pentane). The mixture was stirred at  $-78$  °C for 1 h and then a solution of (*S*)-**1b** (72 mg, 0.25 mmol, 1.0 eq.) in THF (1.0 mL) was added. The mixture was stirred at  $-78$  °C for 1 h at which point <sup>11</sup>B NMR spectroscopy showed complete formation of the ‘ate’ complex [<sup>11</sup>B NMR, 96 MHz, THF)  $\delta_B \sim 8$  ppm]. The mixture was warmed to r.t. and the solvents were removed under high vacuum. The crude was re-dissolved in MeCN:*i*-PrOH (1:1, 2 mL) and the mixture was cooled to 0 °C. A solution of NBS (45 mg, 0.25 mmol, 1.0 eq.) in MeCN (1.0 mL) was added dropwise. After 1 h saturated aqueous solution of Na<sub>2</sub>S<sub>2</sub>O<sub>3</sub> (2 mL) was added. After 2 min. the reaction mixture was allowed to warm to r.t. The reaction mixture was diluted with EtOAc (10 mL) and washed with water (15 mL). The aqueous layer was extracted with EtOAc (2 x 15 mL), the combined organic layers were dried MgSO<sub>4</sub>, filtered and concentrated under vacuum. Purification by flash column chromatography eluting with *n*-hexane:EtOAc (95:5) gave (*S*)-**11ba-major** (40 mg, 40%) as an oil; er (*S*:*R*) 96:4;  $R_f$  0.21 (petrol:Et<sub>2</sub>O 95:5);  $[\alpha]_D^{23} - 20$  ( $c$  1, CHCl<sub>3</sub>); IR (film):  $\nu$  (cm<sup>-1</sup>) 2974, 2931, 2837, 1600, 1511, 1347, 1243, 1144, 1029, 859, 817, 659; <sup>1</sup>H NMR (400 MHz, CDCl<sub>3</sub>)  $\delta$  ppm 7.75 (d,  $J = 8.3$  Hz, 1H), 7.08–7.03 (m, 2H), 6.87 (d,  $J = 2.4$  Hz, 1H), 6.83–6.77 (m, 2H), 6.73 (dd,  $J = 8.3, 2.4$  Hz, 1H), 3.83 (s, 3H), 3.78 (s, 3H), 3.65 (sx,  $J = 7.0$  Hz, 1H), 2.56 (m, 1H), 2.47 (m, 1H), 1.91 (m, 1H), 1.81 (m, 1H), 1.32 (s, 6H), 1.31 (s, 6H), 1.27 (d,  $J = 7.0$  Hz, 3H); <sup>13</sup>C NMR (100 MHz, CDCl<sub>3</sub>)  $\delta$  ppm 162.0, 157.5, 156.7, 137.8, 135.2, 129.1, 113.6, 111.4, 109.8, 83.1, 55.2, 55.0, 40.8, 36.4, 33.2, 30.9, 24.9, 24.8, 22.4; <sup>11</sup>B NMR (96 MHz, NONE)  $\delta$  ppm 30.4; HRMS (ESI) calcd. for C<sub>24</sub>H<sub>34</sub>BO<sub>4</sub> [ $M+H$ ]<sup>+</sup> 397.2549, found 397.2537.

Resolution between the enantiomers of **11ba-major** was achieved using a chiral SFC system fitted with a Chiralcel Whelk-01 column as the stationary phase with CO<sub>2</sub>:*n*-hexane:*i*-PrOH

(9:1 v:v)] as the mobile phase at a flow rate of 4.0 mL min<sup>-1</sup> (*P* = 125 bar). Injection volume: 10 μL of a 2 g L<sup>-1</sup> solution of compound in the eluent. Under these conditions, the faster running component (*R*) and the slower running component (*S*) were eluted at 33.5 and 35.0 min., respectively, with a total analysis time of 45 min.

**(*S*)-2-(2-methoxy-6-(4-(4-methoxyphenyl)butan-2-yl)phenyl)-4,4,5,5-tetramethyl-1,3,2-dioxaborolane [(*S*)-11ba-minor]**

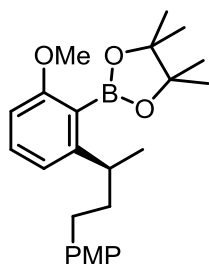

A solution of 3-bromoanisole (56 mg, 0.30 mmol, 1.2 eq.) in THF (2.5 mL) was cooled to -78 °C and treated with *t*-BuLi (0.35 mL, 0.60 mmol, 2.4 eq., 1.7 M in pentane). The mixture was stirred at -78 °C for 1 h and then a solution of (*S*)-**1b** (50 mg, 0.25 mmol, 1.0 eq.) in THF (1.0 mL) was added. The mixture was stirred at -78 °C for 1 h at which point <sup>11</sup>B NMR spectroscopy showed complete formation of the 'ate' complex [<sup>11</sup>B NMR, 96 MHz, THF) δ<sub>B</sub> ~ 8 ppm]. The mixture was warmed to r.t. and the solvents were removed under high vacuum. The crude was re-dissolved in MeCN:*i*-PrOH (1:1, 2 mL) and the mixture was cooled to 0 °C. A solution of NBS (45 mg, 0.25 mmol, 1.0 eq.) in MeCN (1.0 mL) was added dropwise. After 1 h saturated aqueous solution of Na<sub>2</sub>S<sub>2</sub>O<sub>3</sub> (2 mL) was added. After 2 min the reaction mixture was allowed to warm to r.t. The reaction mixture was diluted with EtOAc (10 mL) and washed with water (15 mL). The aqueous layer was extracted with EtOAc (2 x 15 mL), the combined organic layers were dried over MgSO<sub>4</sub>, filtered and concentrated under vacuum. Purification by flash column chromatography eluting with *n*-hexane:EtOAc (95:5) gave (*S*)-**11ba-minor** (15 mg, 15%) was obtained as an oil; er (*S*:*R*) 96:4; *R*<sub>f</sub> 0.15 (petrol:Et<sub>2</sub>O 9:1); [α]<sub>D</sub><sup>23</sup> - 58 (*c* 0.5, CHCl<sub>3</sub>); IR (film): ν (cm<sup>-1</sup>) 2987, 2972, 2901, 1511, 1372, 1248, 1074, 855; <sup>1</sup>H NMR (400 MHz, CDCl<sub>3</sub>) δ ppm 7.28 (t, *J* = 7.9 Hz, 1H), 7.10–7.03 (m, 2H), 6.86 (d, *J* = 7.9 Hz, 1H), 6.83–6.87 (m, 2H), 6.66 (d, *J* = 7.9 Hz, 1H), 3.78 (s, 6H), 2.72 (sx, *J* = 7.0 Hz, 1H), 2.59–2.40 (m, 2H), 1.98 (m, 1H), 1.83 (m, 1H), 1.37 (s, 6H), 1.36 (s, 6H), 1.27 (d, *J* = 7.0 Hz, 3H); <sup>13</sup>C NMR (100 MHz, CDCl<sub>3</sub>) δ ppm; 162.4, 157.5, 152.2, 134.9, 130.5, 129.2, 117.5, 113.6, 107.1, 83.8, 55.4, 55.2, 39.8, 39.7, 33.1, 24.8, 24.7, 22.7; <sup>11</sup>B NMR (96 MHz, NONE) δ ppm 32.8; HRMS (ESI) calcd. for C<sub>24</sub>H<sub>34</sub>BO<sub>4</sub> [*M*+H]<sup>+</sup> 397.2549, found 397.2541.

Resolution of the enantiomers of **11ba-minor** was achieved using a chiral SFC system fitted with a Chiracel IB column as the stationary phase with CO<sub>2</sub>:*n*-hexane:*i*-PrOH (1:1, v:v)] as the mobile phase at a flow rate of 4.0 mL min<sup>-1</sup> (*P* = 125 bar). Injection volume: 20 μL of a 2 g L<sup>-1</sup> solution of compound in the eluent. Under these conditions, the faster running

component (*S*) and the slower running component (*R*) were eluted at 5.7 and 7.3 min., respectively, with a total analysis time of 15 min.

**(*S*)-2-(1-(4-(4-methoxyphenyl)butan-2-yl)naphthalen-2-yl)-4,4,5,5-tetramethyl-1,3,2-dioxaborolane [(*S*)-15ba]**

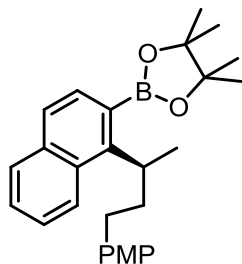

A solution of 1-bromonaphthalene (42  $\mu$ L, 0.30 mmol, 1.2 eq.) in Et<sub>2</sub>O (1.0 mL) was cooled to 0 °C and *n*-BuLi (0.19 mL, 0.30 mmol, 1.2 eq., 1.6 M in hexanes) was added dropwise. The mixture was stirred at 0 °C for 1 h. (*S*)-**1b** (72 mg, 0.25 mmol, 1.0 eq.) was added and the mixture was stirred at 0 °C for 1 h at which point <sup>11</sup>B NMR spectroscopy showed complete formation of the ‘ate’ complex [<sup>11</sup>B NMR, 96 MHz, THF)  $\delta_B$  ~ 8 ppm]. The mixture was warmed to r.t. and the solvents were removed under high vacuum. The crude residue was re-dissolved in MeCN:*i*-PrOH (1:1, 2 mL) and the mixture was cooled to 0 °C. A solution of NBS (128 mg, 0.72 mmol, 2.4 eq.) in MeCN (2.0 mL) was added dropwise. After 1 h saturated aqueous solution of Na<sub>2</sub>S<sub>2</sub>O<sub>3</sub> (2 mL) was added. After 2 min. the reaction mixture was allowed to warm to r.t. The reaction mixture was diluted with EtOAc (10 mL) and washed with water (15 mL). The aqueous layer was extracted with EtOAc (2 x 15 mL), the combined organic layers were dried over MgSO<sub>4</sub>, filtered and concentrated under vacuum. Purification by flash column chromatography eluting with *n*-hexane:Et<sub>2</sub>O (95:5) gave (*S*)-**15ba** (75 mg, 72%) as an oil; er (*S*:*R*) 95:5; *R*<sub>f</sub> 0.23 (petrol:Et<sub>2</sub>O 95:5); [ $\alpha$ ]<sub>D</sub><sup>24</sup> – 25 (*c* 0.3, CHCl<sub>3</sub>) IR (film):  $\nu$  (cm<sup>-1</sup>) 2987, 2972, 2901, 1393, 1249, 1075, 1066, 878; <sup>1</sup>H NMR (500 MHz, DMSO, 90 °C)  $\delta$  ppm 8.28 (m, 1H), 7.92 (m, 1H), 7.76 (d, *J* = 8.1 Hz, 1H), 7.60 (d, *J* = 8.1 Hz, 1H), 7.56–7.50 (m, 2H), 7.07–7.02 (m, 2H), 6.85–6.80 (m, 2H), 3.95 (sx., *J* = 7.2 Hz, 1H), 3.75 (s, 3H), 2.63 (dt, *J* = 13.9, 7.8 Hz, 1H), 2.40 (dt, *J* = 13.9, 7.8 Hz, 1H), 2.26 (q, *J* = 7.8 Hz, 2H), 1.57 (d, *J* = 7.2 Hz, 3H), 1.40 (s, 6H), 1.39 (s, 6H); <sup>13</sup>C NMR (126 MHz, DMSO, 90 °C)  $\delta$  ppm 158.0, 149.8, 135.4, 134.6, 131.5, 130.7, 129.4, 129.3, 126.3, 125.9, 125.7, 114.4, 84.2, 55.6, 55.6, 39.6, 34.0, 25.1, 21.6; <sup>11</sup>B NMR (96 MHz, NONE)  $\delta$  ppm 30.7; HRMS (ESI) calcd. for C<sub>27</sub>H<sub>33</sub>BNaO<sub>3</sub> [*M*+Na]<sup>+</sup> 439.2415, found 439.2406.

Resolution of the enantiomers of **15ba** was achieved using a chiral SFC system fitted with a Chiracel IA column as the stationary phase with CO<sub>2</sub>: [*n*-hexane:*i*-PrOH (1:1, v:v)] as the mobile phase at a flow rate of 4.0 mL min<sup>-1</sup> (*P* = 125 bar). Injection volume: 20  $\mu$ L of a 2 g L<sup>-1</sup> solution of compound in the eluent. Under these conditions, the faster running component

(*R*) and the slower running component (*S*) were eluted at 10.3 and 11.5 min., respectively, with a total analysis time of 15 min.

**(*S*)-2-(2,4-dimethyl-6-(4-phenylbutan-2-yl)phenyl)-4,4,5,5-tetramethyl-1,3,2-dioxaborolane [(*S*)-18aa]**

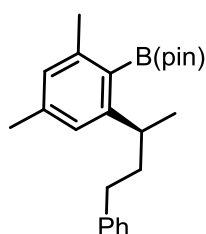

A solution of 3,5-(dimethyl)bromobenzene (41 mg, 0.30 mmol, 1.2 eq.) in THF (2.0 mL) was cooled to  $-78\text{ }^{\circ}\text{C}$  and treated with *t*-BuLi (0.35 mL, 0.60 mmol, 2.4 eq., 1.7 M in pentane). The mixture was stirred at  $-78\text{ }^{\circ}\text{C}$  for 30 min and then a solution of (*S*)-**1a** (72 mg, 0.25 mmol, 1.0 eq.) in THF (1.0 mL) was added. The mixture was stirred at  $-78\text{ }^{\circ}\text{C}$  for 1 h at which point  $^{11}\text{B}$  NMR spectroscopy showed complete formation of the ‘ate’ complex [ $^{11}\text{B}$  NMR, 96 MHz, THF)  $\delta_{\text{B}} \sim 8$  ppm]. The mixture was warmed to r.t. and the solvents were removed under high vacuum. The crude was re-dissolved in MeCN:*i*-PrOH (1:1, 2 mL) and the mixture was cooled to  $0\text{ }^{\circ}\text{C}$ . A solution of NBS (107 mg, 0.6 mmol, 2.4 eq.) in MeCN (2.0 mL) was added dropwise. After 1 h saturated aqueous solution of  $\text{Na}_2\text{S}_2\text{O}_3$  (2 mL) was added. After 2 min. the reaction mixture was allowed to warm to r.t. The reaction mixture was diluted with EtOAc (10 mL) and washed with water (15 mL). The aqueous layer was extracted with EtOAc (2 x 15 mL), the combined organic layers were dried over  $\text{MgSO}_4$ , filtered and concentrated under vacuum. Purification by flash column chromatography eluting with *n*-hexane:Et<sub>2</sub>O (9:1) gave (*S*)-**18aa** (82 mg, 90%) as an oil; er (*R*:*S*) 95:5;  $R_f$  0.38 (petrol:Et<sub>2</sub>O 9:1);  $[\alpha]_{\text{D}}^{21} -36$  (*c* 1,  $\text{CHCl}_3$ ); IR (film):  $\nu$  ( $\text{cm}^{-1}$ ) 2981, 2931, 2850, 1327, 1296, 1141, 1060, 855, 697, 685.;  $^1\text{H}$  NMR (400 MHz,  $\text{CDCl}_3$ )  $\delta$  ppm 7.29–7.22 (m, 2H), 7.20–7.12 (m, 3H), 6.89 (s, 1H), 6.81 (s, 1H) 2.88 (sx,  $J = 7.1$  Hz, 1H), 2.63 (m, 1H), 2.51(m, 1H), 2.37 (s, 3H), 2.29 (s, 3H), 2.08–1.95 (m, 1H), 1.92–1.79 (m, 1H), 1.36 (s, 12H), 1.28 (d,  $J = 7.1$  Hz, 3H).  $^{13}\text{C}$  NMR (100 MHz,  $\text{CDCl}_3$ )  $\delta$  ppm; 151.3, 142.9, 141.1, 138.9, 128.3, 128.2, 127.8, 125.5, 122.5, 83.6, 39.8, 39.3, 34.2, 25.1, 25.0, 22.9, 22.1, 21.5;  $^{11}\text{B}$  NMR (96 MHz, NONE)  $\delta$  ppm 31.6; HRMS (ESI) calcd. for  $\text{C}_{24}\text{H}_{33}\text{BO}_2$  [ $M+\text{H}$ ]<sup>+</sup> 365.2651, found 365.2642. Resolution of the enantiomers of **18aa** was achieved using a chiral HPLC system fitted with a Chiralpak IB column with guard as the stationary phase with *n*-hexanes the mobile phase at a flow rate of  $1.0\text{ mL min}^{-1}$  ( $T = 0\text{ }^{\circ}\text{C}$ ). Injection volume:  $2\text{ }\mu\text{L}$  of a  $2\text{ g L}^{-1}$  solution of compound in the eluent. Under these conditions, the faster running component (*R*) and the slower running component (*S*) were eluted at 38.4 and 48.8 min., respectively, with a total analysis time of 70 min.

**(S)-2-(2,4-dimethoxy-6-(3-methyl-1-phenylpentan-3-yl)phenyl)-4,4,5,5-tetramethyl-1,3,2-dioxaborolane [(S)-9ga]**

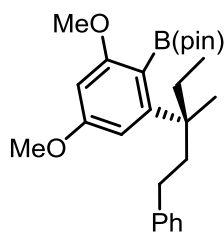

A solution of 3,5-(dimethoxy)bromobenzene (65 mg, 0.30 mmol, 1.2 eq.) in THF (2.0 mL) was cooled to  $-78$  °C and treated with *t*-BuLi (0.35 mL, 0.60 mmol, 2.4 eq., 1.7 M in pentane). The mixture was stirred at  $-78$  °C for 30 min. and then a solution of (*R*)-**1g** (72 mg, 0.25 mmol, 1.0 eq.) in THF (1.0 mL) was added. The mixture was stirred at  $-78$  °C for 1 h at which point  $^{11}\text{B}$  NMR spectroscopy showed complete formation of the ‘ate’ complex [ $^{11}\text{B}$  NMR, 96 MHz, THF)  $\delta_{\text{B}} \sim 8$  ppm]. The mixture was warmed to r.t. and the solvents were removed under high vacuum. The crude was re-dissolved in MeCN:*i*-PrOH (1:1, 2 mL) and the mixture was cooled to 0 °C. A solution of NBS (45 mg, 0.25 mmol, 1.0 eq.) in MeCN (1.0 mL) was added dropwise. After 1 h saturated aqueous solution of  $\text{Na}_2\text{S}_2\text{O}_3$  (2 mL) was added. After 2 min. the reaction mixture was allowed to warm to r.t. The reaction mixture was diluted with EtOAc (10 mL) and washed with water (15 mL). The aqueous layer was extracted with EtOAc (2 x 15 mL), the combined organic layers were dried over  $\text{MgSO}_4$ , filtered and concentrated under vacuum. Purification by flash column chromatography eluting with *n*-hexane:EtOAc (95:5) gave (*S*)-**9ga** (48 mg, 46%) as an oil; er (*S*:*R*) 99:1;  $R_{\text{f}}$  0.32 (petrol:Et<sub>2</sub>O 65:35);  $[\alpha]_{\text{D}}^{23} - 3$  (*c* 0.1,  $\text{CHCl}_3$ ); IR (film):  $\nu$  ( $\text{cm}^{-1}$ ) 2973, 2931, 1599, 1569, 1453, 1325, 1293, 1141, 1041, 856, 698  $^1\text{H}$  NMR (400 MHz,  $\text{CDCl}_3$ )  $\delta$  ppm; 7.25–7.18 (m, 4H), 7.16–7.10 (m, 1H), 6.52 (d,  $J = 2.0$  Hz, 1H), 6.30 (d,  $J = 2.06$  Hz, 1H), 3.82 (s, 3H), 3.79 (s, 3H), 2.42 (dt,  $J = 13.1, 4.6$  Hz, 1H), 2.29 (dt,  $J = 13.1, 4.6$  Hz, 1H), 2.16 (dt,  $J = 13.1, 4.6$  Hz, 1H), 1.90 (m, 1H), 1.74 (dt,  $J = 13.1, 4.6$  Hz, 1H), 1.59 (m, 1H), 1.40 (s, 3H), 1.37 (s, 6H), 1.36 (s, 6H), 0.71 (t,  $J = 7.4$  Hz, 3H);  $^{13}\text{C}$  NMR (100 MHz,  $\text{CDCl}_3$ )  $\delta$  ppm 164.5, 161.0, 153.3, 143.5, 128.6, 128.0, 125.3, 106.1, 94.2, 83.6, 55.4, 55.1, 45.6, 43.2, 36.0, 31.1, 25.1, 24.9, 24.2, 8.7;  $^{11}\text{B}$  NMR (96 MHz, NONE)  $\delta$  ppm 30.4; HRMS (EI) calcd. for  $\text{C}_{26}\text{H}_{37}\text{BO}_4$  [ $M$ ]<sup>+</sup> 424.2421, found 424.2427.

Resolution of the enantiomers of **9ga** was achieved using a chiral SFC system fitted with a Chiracel IB column as the stationary phase with  $\text{CO}_2$ : [*n*-hexane:*i*-PrOH (9:1 v:v)] as the mobile phase at a flow rate of  $4.0 \text{ mL min}^{-1}$  ( $P = 125$  bar). Injection volume: 20  $\mu\text{L}$  of a 2 g  $\text{L}^{-1}$  solution of compound in the eluent. Under these conditions, the faster running component (*S*) and the slower running component (*R*) were eluted at 5.8 and 6.8 min., respectively, with a total analysis time of 15 min.

**(S)-2-(2,4-dimethyl-6-(3-methyl-1-phenylpentan-3-yl)phenyl)-4,4,5,5-tetramethyl-1,3,2-dioxaborolane [(S)-18ga]**

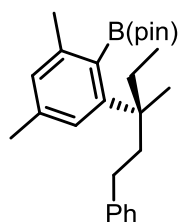

A solution of 3,5-(dimethyl)bromobenzene (41 mg, 0.30 mmol, 1.2 eq.) in THF (2.0 mL) was cooled to  $-78\text{ }^{\circ}\text{C}$  and treated with *t*-BuLi (0.35 mL, 0.60 mmol, 2.4 eq., 1.7 M in pentane). The mixture was stirred at  $-78\text{ }^{\circ}\text{C}$  for 1 h and then a solution of (*R*)-**1g** (72 mg, 0.25 mmol, 1.0 eq.) in THF (1.0 mL) was added. The mixture was stirred at  $-78\text{ }^{\circ}\text{C}$  for 1 h at which point  $^{11}\text{B}$  NMR spectroscopy showed complete formation of the ‘ate’ complex [ $^{11}\text{B}$  NMR, 96 MHz, THF)  $\delta_{\text{B}} \sim 8$  ppm]. The mixture was warmed to r.t. and the solvents were removed under high vacuum. The crude was re-dissolved in MeCN:*i*-PrOH (1:1, 2 mL) and the mixture was cooled to  $0\text{ }^{\circ}\text{C}$ . A solution of NBS (107 mg, 0.6 mmol, 2.4 eq.) in MeCN (2.0 mL) was added dropwise. After 1 h saturated aqueous solution of  $\text{Na}_2\text{S}_2\text{O}_3$  (2 mL) was added. After 2 min. the reaction mixture was allowed to warm to r.t. The reaction mixture was diluted with EtOAc (10 mL) and washed with water (15 mL). The aqueous layer was extracted with EtOAc (2 x 15 mL), the combined organic layers were dried over  $\text{MgSO}_4$ , filtered and concentrated under vacuum. Purification by flash column chromatography eluting with *n*-hexane:Et<sub>2</sub>O (9:1) gave (*S*)-**18ga** (81 mg, 83%) as an oil  $R_f$  0.3 (pentane:Et<sub>2</sub>O 95:5); IR (film):  $\nu$  ( $\text{cm}^{-1}$ ) 2975, 2927, 1607, 1453, 1372, 1324, 1295, 1141, 1059, 855, 699, 684, 745;  $^1\text{H}$  NMR (400 MHz,  $\text{CDCl}_3$ )  $\delta$  ppm 7.25–7.21 (m, 2H), 7.20–7.17 (m, 2H), 7.13 (m, 1H) 7.11 (tt,  $J = 7.2, 1.5$  Hz, 1H), 6.96 (m, 1H), 6.82 (br s, 1H), 2.41 (dt,  $J = 13.0, 4.5$  Hz, 1H), 2.41 (s, 3H), 2.30 (s, 3H), 2.26 (dt,  $J = 13.0, 4.5$  Hz, 1H), 2.20 (dt,  $J = 13.0, 4.5$  Hz, 1H), 1.93 (dq,  $J = 14.4, 7.4$  Hz, 1H), 1.78 (dt,  $J = 13.5, 4.5$  Hz, 1H), 1.65 (dq,  $J = 14.4, 7.4$  Hz, 1H), 1.43 (s, 3H), 1.40 (s, 6H), 1.38 (s, 6H), 0.72 (t,  $J = 7.4$  Hz, 3H);  $^{13}\text{C}$  NMR (100 MHz,  $\text{CDCl}_3$ )  $\delta$  ppm 150.5, 143.7, 140.8, 137.4, 128.6, 128.0, 127.5, 125.3, 125.2, 83.7, 45.4, 42.9, 35.8, 31.2, 25.8, 25.6, 24.8, 22.50 21.6, 8.8.;  $^{11}\text{B}$  NMR (96 MHz,  $\text{CDCl}_3$ )  $\delta$  ppm 31.2; HRMS (ESI) calcd. for  $\text{C}_{26}\text{H}_{37}\text{BO}_2$  [ $M+\text{H}$ ]<sup>+</sup> 393.2964, found 393.2949.

Resolution of the enantiomers of **18ga** was achieved using a chiral SFC system fitted with a Chiralcel Whelk-01 column as the stationary phase with  $\text{CO}_2$ :*n*-hexane as the mobile phase at a flow rate of  $2.0\text{ mL min}^{-1}$  ( $P = 125$  bar). Injection volume:  $20\text{ }\mu\text{L}$  of a  $2\text{ g L}^{-1}$  solution of compound in the eluent. Under these conditions, the faster running component (*S*) and the slower running component (*R*) were eluted at 18.0 and 19.0 min., respectively, with a total analysis time of 25 min.

**(R)-2-(2-(4-(4-methoxyphenyl)butan-2-yl)benzo[b]thiophen-3-yl)-4,4,5,5-tetramethyl-1,3,2-dioxaborolane [(R)-8ba]**

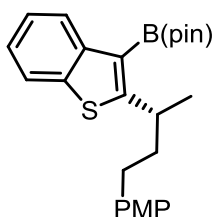

A solution of benzothiophene (35  $\mu$ L, 0.30 mmol, 1.2 eq.) in THF (2.0 mL) was cooled to  $-78$   $^{\circ}$ C and treated with *t*-BuLi (0.2 mL, 0.30 mmol, 1.2 eq., 1.6 M in hexane). The mixture was stirred at  $-78$   $^{\circ}$ C for 1 h and then a solution of (*R*)-**1b** (72 mg, 0.25 mmol, 1.0 eq.) in THF (1.0 mL) was added. The mixture was stirred at  $-78$   $^{\circ}$ C for 1 h at which point  $^{11}$ B NMR spectroscopy showed complete formation of the ‘ate’ complex [ $^{11}$ B NMR, 96 MHz, THF)  $\delta_{\text{B}} \sim 8$  ppm]. The mixture was warmed to r.t. and the solvents were removed under high vacuum. The crude was re-dissolved in MeCN:*i*-PrOH (1:1, 2 mL) and the mixture was cooled to 0  $^{\circ}$ C. A solution of NBS (53 mg, 0.3 mmol, 1.2 eq.) in MeCN (1.0 mL) was added dropwise. After 1 h saturated aqueous solution of Na<sub>2</sub>S<sub>2</sub>O<sub>3</sub> (2 mL) was added. After 2 min. the reaction mixture was allowed to warm to r.t. The reaction mixture was diluted with EtOAc (10 mL) and washed with water (15 mL). The aqueous layer was extracted with EtOAc (2 x 15 mL), the combined organic layers were dried (MgSO<sub>4</sub>), filtered and concentrated under vacuum. Purification by flash column chromatography eluting with *n*-hexane:Et<sub>2</sub>O (9:1) gave (*R*)-**8ba** (48 mg, 46%) was obtained as an oil; er (*R*:*S*) 96:4; *R*<sub>f</sub> 0.21 (petrol:Et<sub>2</sub>O 95:5);  $[\alpha]_{\text{D}}^{23} - 39$  (*c* 1, CHCl<sub>3</sub>); IR (film):  $\nu$  (cm<sup>-1</sup>) 2973, 2921, 1511, 1456, 1370, 1234, 1142, 762;  $^1\text{H}$  NMR (400 MHz, CDCl<sub>3</sub>)  $\delta$  ppm: 8.33 (br d, *J* = 8.0 Hz, 1H), 7.77 (br d, *J* = 8.0 Hz, 1H), 7.34 (m, 1H), 7.27 (m, 1H), 7.10–7.04 (m, 2H), 6.83–6.76 (m, 2H), 4.01 (sx, *J* = 7.0 Hz, 1H), 3.77 (s, 3H), 2.66–2.45 (m, 2H), 2.01–1.90 (m, 2H), 1.39 (d, *J* = 7.0 Hz, 3H), 1.37 (s, 6 H), 1.36 (s, 6H);  $^{13}\text{C}$  NMR (100 MHz, CDCl<sub>3</sub>)  $\delta$  ppm: 167.51, 157.73, 144.27, 139.10, 134.72, 129.32, 125.12, 124.16, 123.43, 121.78, 113.78, 83.17, 55.33, 41.96, 35.50, 33.23, 25.08, 24.99, 24.17; HRMS (ESI) calcd. for C<sub>25</sub>H<sub>32</sub>BO<sub>3</sub>S [*M*+*H*]<sup>+</sup> 423.2165, found 423.2186.

Resolution of the enantiomers of **8ba** was achieved using a chiral SFC system fitted with a Chiracel IB column as the stationary phase with CO<sub>2</sub>:*n*-hexane:*i*-PrOH (9:1, v:v) as the mobile phase at a flow rate of 4.0 mL min<sup>-1</sup> (*P* = 125 bar). Injection volume: 10  $\mu$ L of a 2 g L<sup>-1</sup> solution of the eluent. Under these conditions, the faster running component (*R*) and the slower running component (*S*) were eluted at 14.3 and 19.0 min., respectively, with a total analysis time of 25 min.



## 9. React-IR studies

The following reaction was studied with use of React-IR:

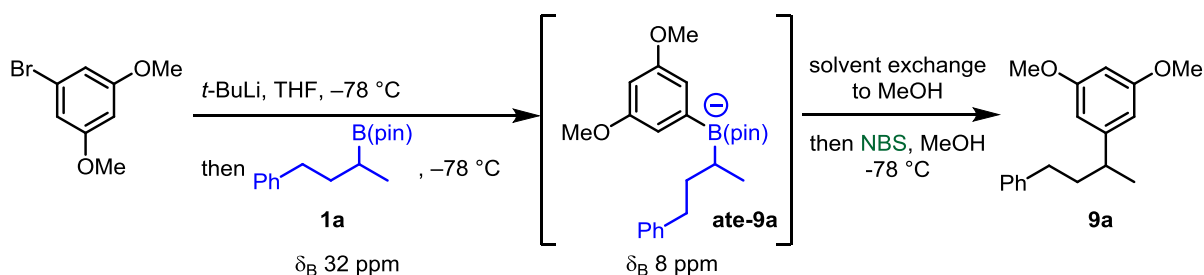

Experimental procedure:

A three-neck round bottom flask equipped with a stirring bar was connected to the React-IR probe, evacuated and refilled with N<sub>2</sub> (x 3). The flask was charged with 3,5-(dimethoxy)-bromobenzene (50 mg, 0.23 mmol, 1.2 eq.) and evacuation/refilling procedure was repeated (x3). THF (2.0 mL) was added and the solution was cooled to -78 °C. The background spectrum was acquired. *t*-BuLi (0.27 mL, 0.46 mmol, 2.4 eq., 1.7M in pentane) was added dropwise and the reaction mixture was stirred for 30 min. *The peak at 1379 cm<sup>-1</sup> was selected to follow organolithium species.* The solution of boronic ester **1a** (50 mg, 0.19 mmol, 1.0 eq.) in THF (1.0 mL) was added (*slow addition is necessary to avoid signal fluctuation*) and the reaction mixture was stirred for 30 min. At this point, the development of new species was observed immediately. The new peak at 1512 cm<sup>-1</sup> was attributed to the 'ate' complex **xx** and its presence was confirmed by <sup>11</sup>B-NMR analysis of a reaction aliquot (δ<sub>B</sub> ~ 8 ppm). React-IR instrument was switched off. The reaction mixture was allowed to warm to r.t and the solvent was removed under high vacuum. The crude was re-dissolved in MeOH (2.0 mL) and the resulting solution was cooled to -78 °C. The React-IR instrument was switched on and the spectrum of 'ate' complex in MeOH -78 °C recorded. *The peak at 1583 cm<sup>-1</sup> was selected to follow the 'ate' complex ate-9a.* The solution of NBS (34 mg, 0.19 mmol, 1.0 eq.) in MeOH (3.0 mL) was added slowly. *Two peaks: 1712 cm<sup>-1</sup> and 1570 cm<sup>-1</sup> appeared rapidly and were attributed to succinimide and the product 9a, respectively.* The diagnostic peak for **9a** was confirmed by preparing the compound separately and recording a React-IR spectrum in MeOH. Et<sub>2</sub>O and water were added to the reaction mixture at -78°C and warmed to ambient temperature. The layers were separated and the aqueous phase was extracted with Et<sub>2</sub>O (x 2). The combined organic layers were dried over MgSO<sub>4</sub> and the solvent was removed under vacuum. <sup>1</sup>H NMR spectroscopy analysis of the crude revealed complete formation of **9a**.

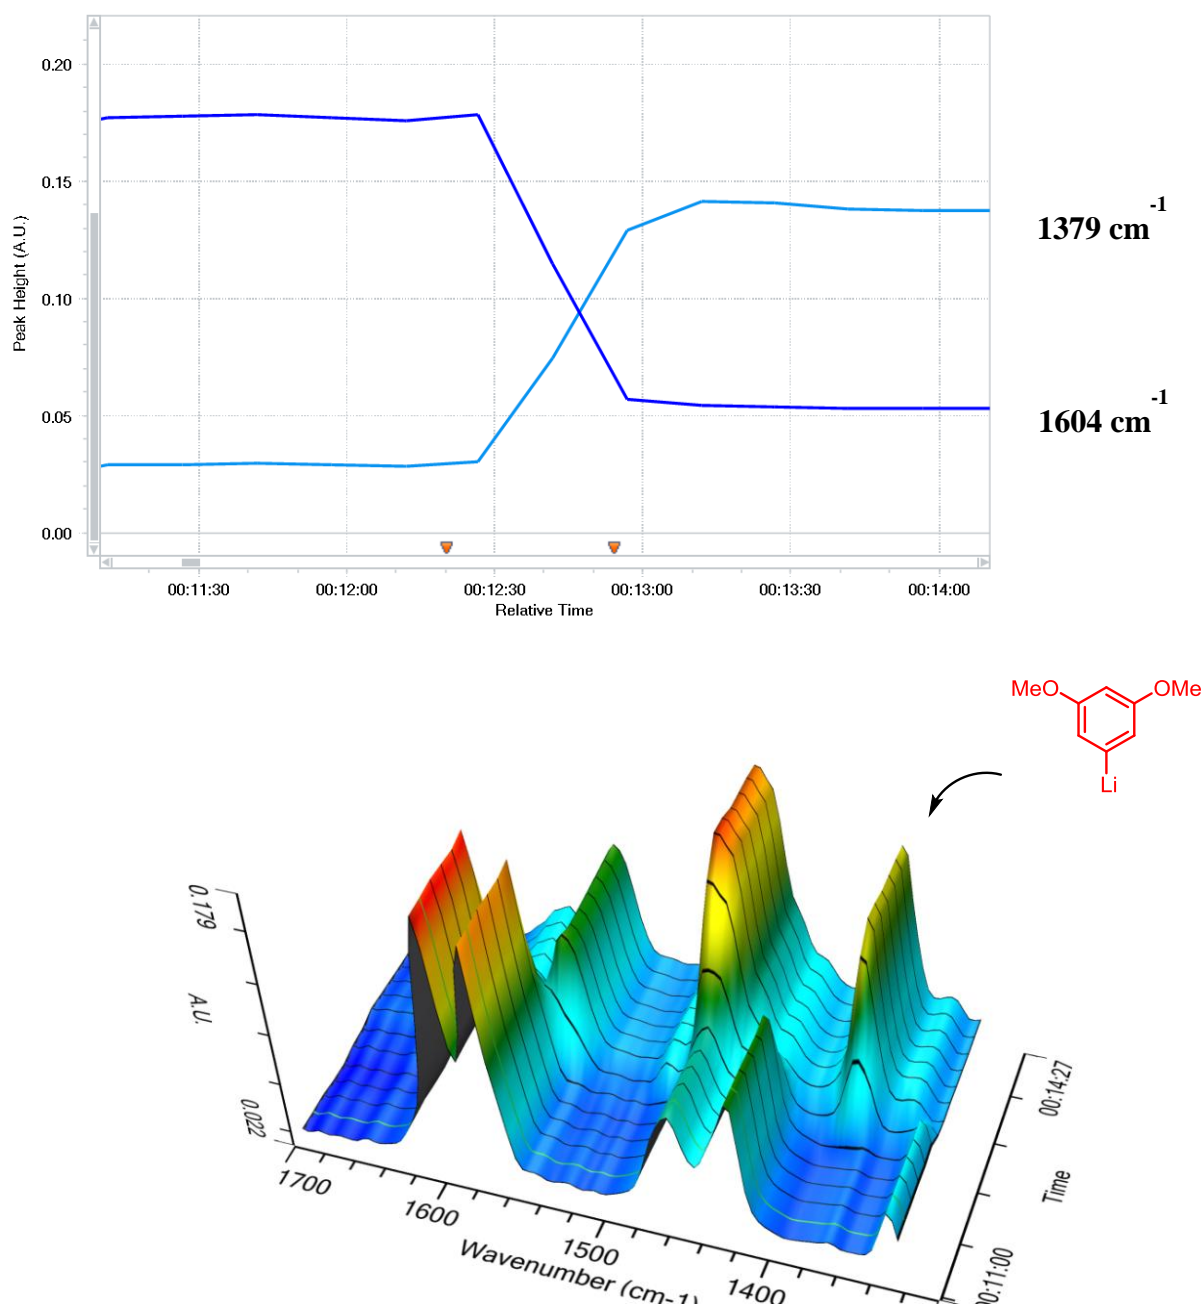

Figure 1. Formation of 3,5-dimethoxyaryllithium.

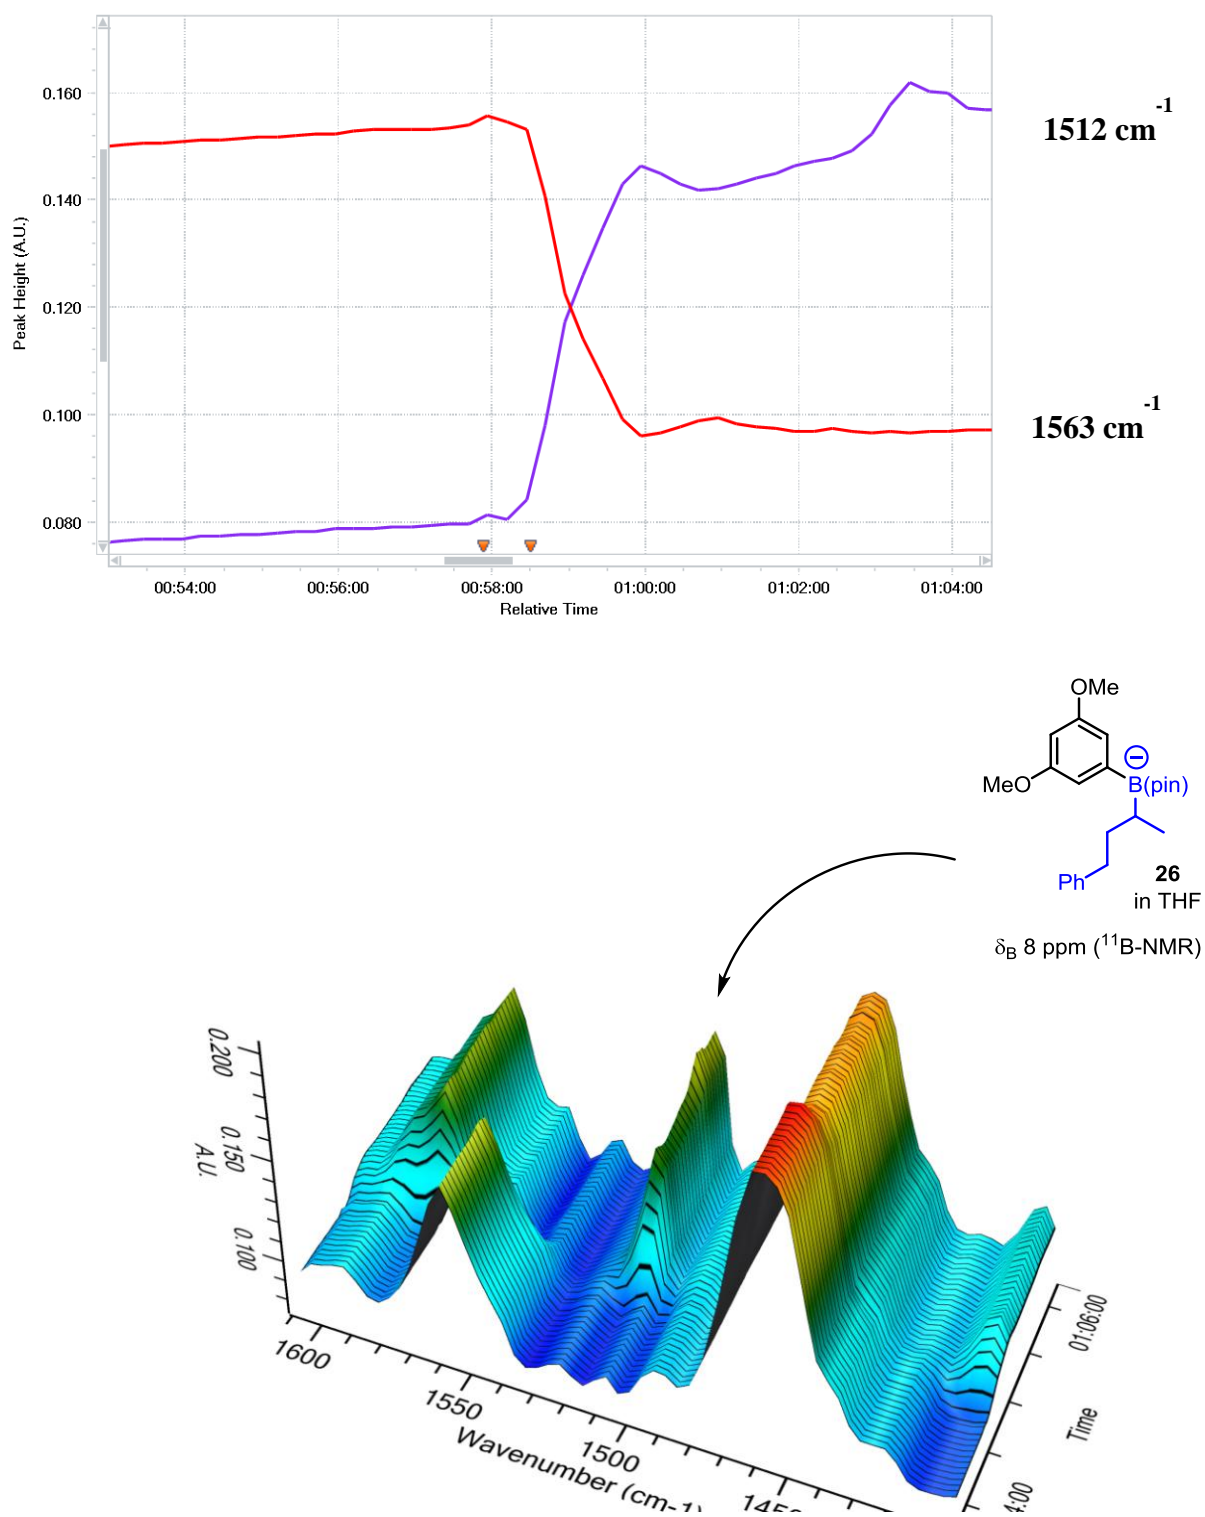

Figure 2. Formation of 'ate' complex **26**.

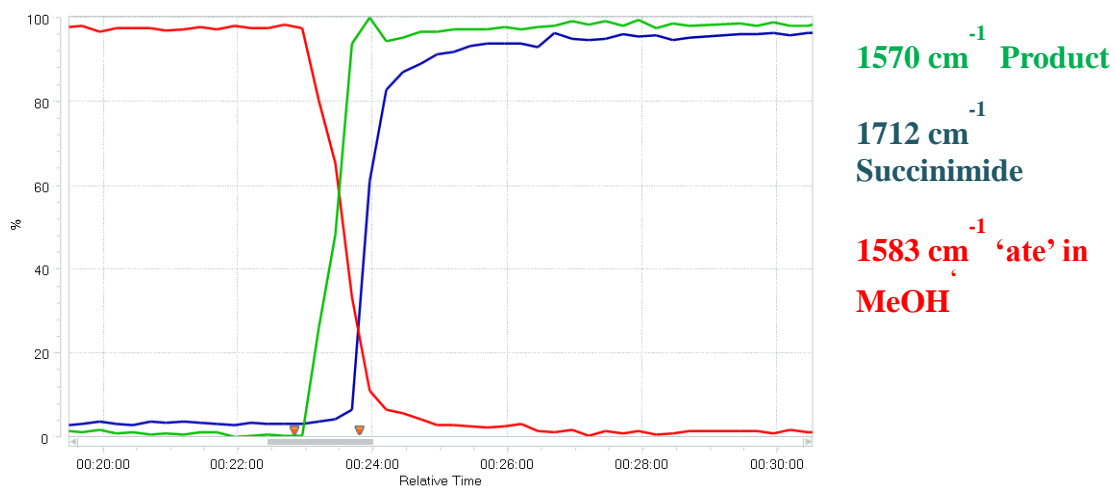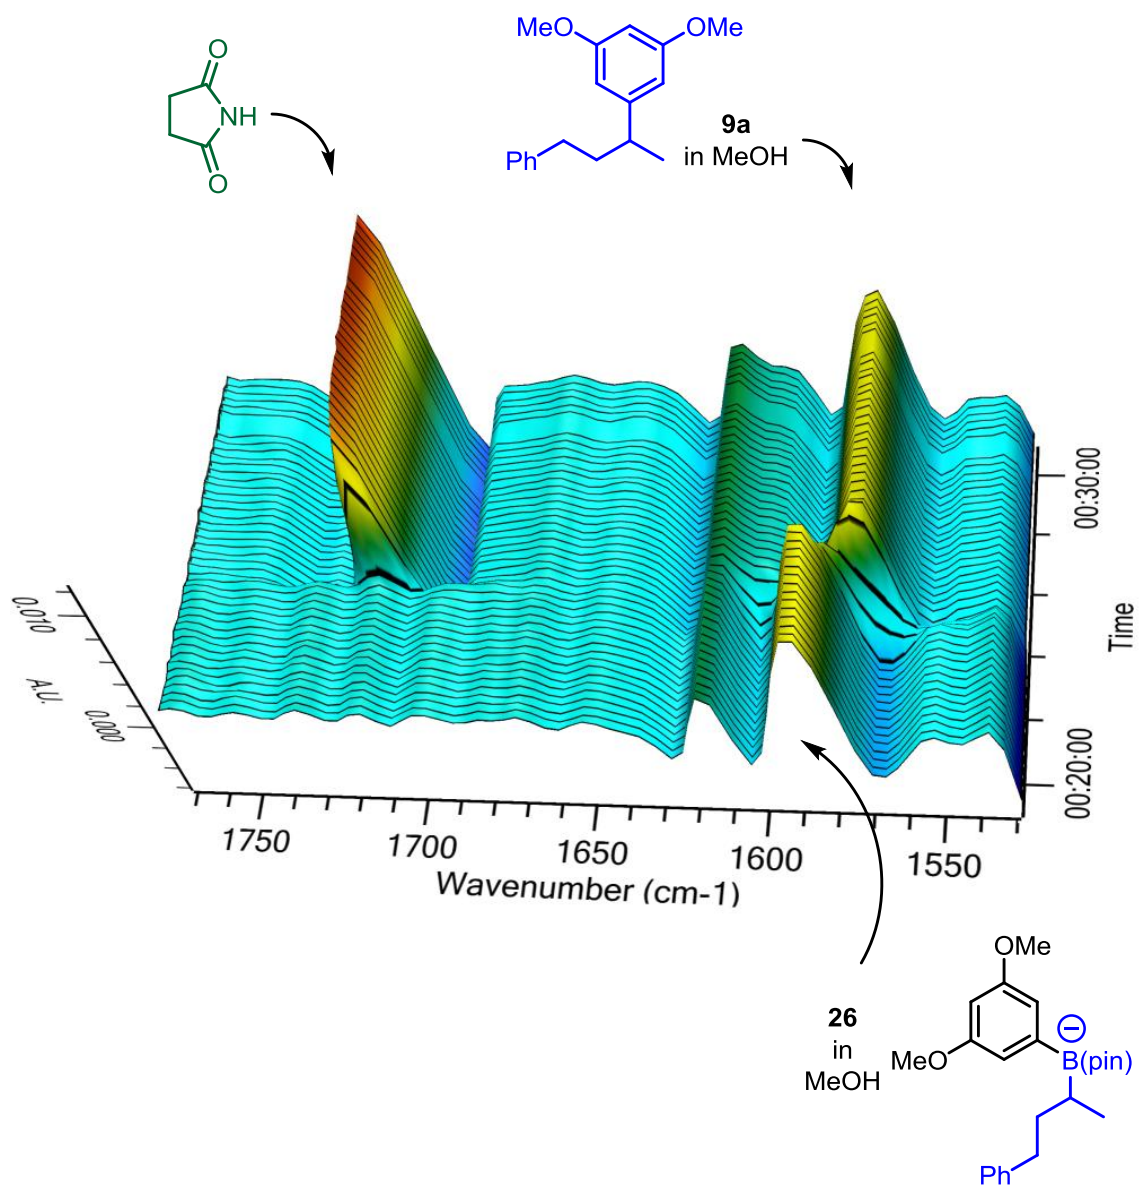

Figure 3. Product formation upon addition of *N*-Bromosuccinimide.

## 10. DFT calculations

**General.** Calculations were performed with the GAUSSIAN 09 suite of programs.<sup>21</sup> Density Functional Theory (DFT) was applied by the means of the B3LYP hybrid functional<sup>22</sup> corrected for dispersion as proposed by Grimme (D2 correction).<sup>23</sup> The 6-31+G(d) basis set was used for all atoms. Geometry optimizations were performed without any symmetry constraints. The stationary points were characterized by full vibration frequencies calculations. Gibbs free energies at 195 K were obtained from the standard enthalpies and entropies computed at 298 K in Gaussian based on the rigid rotor harmonic oscillator approach to statistical mechanics. Also, Gibbs energies were corrected to take into account a standard state corresponding to species in solution at a concentration of 1 M. To do this, we used the correction:  $G^{1M} = G^{1atm} + RT \ln(C^{1M}/C^{1atm})$  where  $G^{1atm}$  is the Gibbs free energy at 195 K,  $C^{1M}$  is the assumed concentration in solution and  $C^{1atm}$  is the gas phase concentration ( $C^{1atm} = 1/V_m = P/RT = 0.0409 \text{ mol.L}^{-1}$  for an ideal gas at 195.15 K and 1 atm). Solvent effects (thf or MeOH) were included by means of SMD single point calculations on the gas-phase optimized structures.<sup>24</sup> Gibbs free energies in solution were estimated as:  $G^{thf} = G^{1M} + E^{thf} - E^{gas\ phase}$ . The counter-cation was not explicitly included in the calculations as it is not expected to actively participate in the reaction.

**Results.** We chose to focus our computational work on the reactivity of furan-, thiophene- and phenyl-substituted boronate complexes. In order to avoid unnecessary conformational issues, we considered model complexes (Scheme 1).

---

<sup>21</sup> Gaussian 09, Revision B.01, Frisch, M. J.; Trucks, G. W.; Schlegel, H. B.; Scuseria, G. E.; Robb, M. A.; Cheeseman, J. R.; Scalmani, G.; Barone, V.; Mennucci, B.; Petersson, G. A.; Nakatsuji, H.; Caricato, M.; Li, X.; Hratchian, H. P.; Izmaylov, A. F.; Bloino, J.; Zheng, G.; Sonnenberg, J. L.; Hada, M.; Ehara, M.; Toyota, K.; Fukuda, R.; Hasegawa, J.; Ishida, M.; Nakajima, T.; Honda, Y.; Kitao, O.; Nakai, H.; Vreven, T.; Montgomery, J. A., Jr.; Peralta, J. E.; Ogliaro, F.; Bearpark, M.; Heyd, J. J.; Brothers, E.; Kudin, K. N.; Staroverov, V. N.; Kobayashi, R.; Normand, J.; Raghavachari, K.; Rendell, A.; Burant, J. C.; Iyengar, S. S.; Tomasi, J.; Cossi, M.; Rega, N.; Millam, J. M.; Klene, M.; Knox, J. E.; Cross, J. B.; Bakken, V.; Adamo, C.; Jaramillo, J.; Gomperts, R.; Stratmann, R. E.; Yazyev, O.; Austin, A. J.; Cammi, R.; Pomelli, C.; Ochterski, J. W.; Martin, R. L.; Morokuma, K.; Zakrzewski, V. G.; Voth, G. A.; Salvador, P.; Dannenberg, J. J.; Dapprich, S.; Daniels, A. D.; Farkas, Ö.; Foresman, J. B.; Ortiz, J. V.; Cioslowski, J.; Fox, D. J. Gaussian, Inc., Wallingford CT, **2009**.

<sup>22</sup> (a) Becke, A. D. *J. Chem. Phys.* **1993**, *98*, 5648-5652. (b) Stephens, P. J.; Devlin, F. J.; Chabalowski, C. F.; Frisch M. J. *J. Phys. Chem.* **1994**, *98*, 11623-11627.

<sup>23</sup> Grimme, S. *J. Comput. Chem.* **2006**, *27*, 1787-1799.

<sup>24</sup> Marenich, A. V.; Cramer, C. J.; Truhlar, D. G. *J. Phys. Chem. B*, **2009**, *113*, 6378-96.

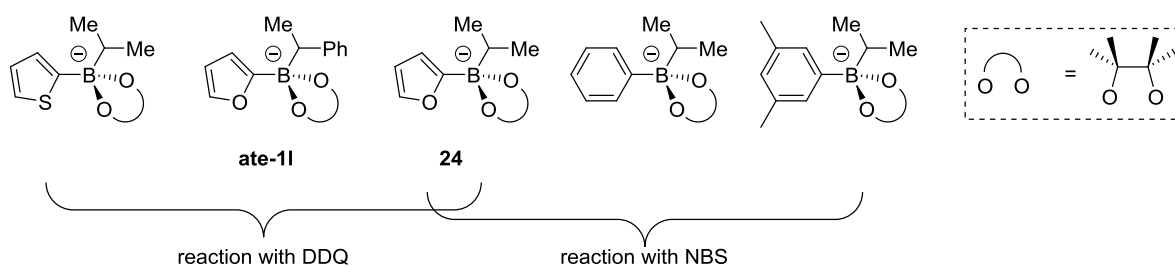

Scheme 1. Complexes under study.

#### Reaction with NBS

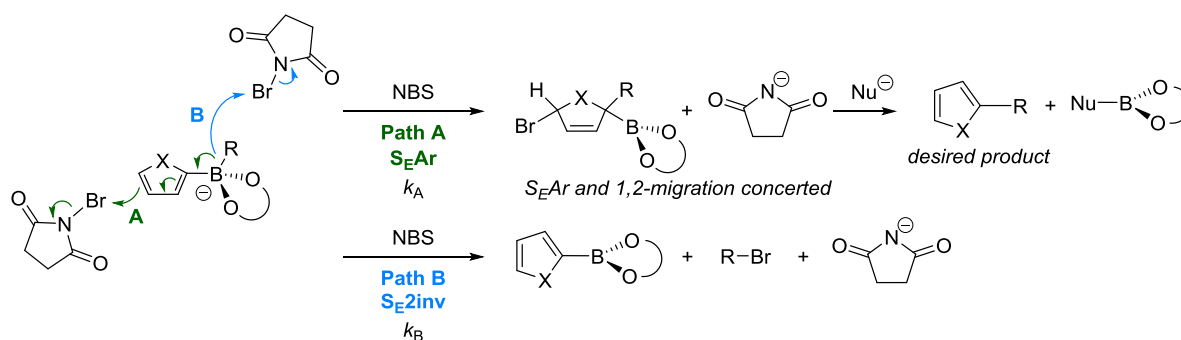

#### Reaction with DDQ

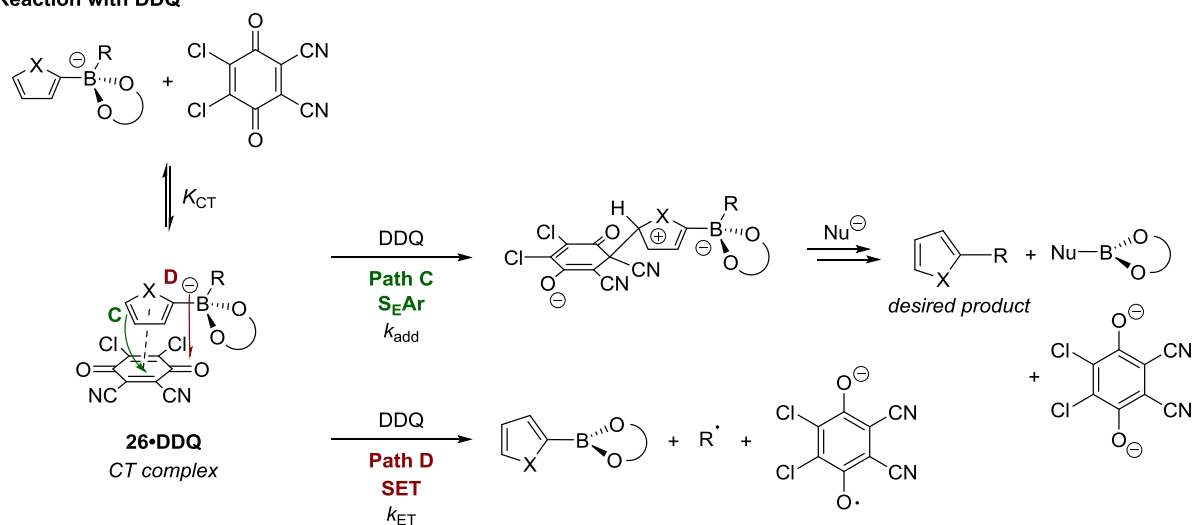

Scheme 2. Proposed mechanistic scheme based on DFT calculations.

**Reaction with DDQ.** The calculated potential energy surface for Path C (Scheme 3) involves initial formation of a strongly bound encounter complex - or “charge-transfer” complex. It then involves nucleophilic addition of the boronate to DDQ followed by migration of the alkyl group from boron to carbon. The resulting species can undergo facile elimination of the DDQ and boronate moieties. The migration step is computed to be highly exothermic ( $\Delta G_{mig}^0$  ranges from -39.0 to -40.6 kcal.mol<sup>-1</sup> depending on the position of the attack), so that the backward reaction is not expected to compete with the subsequent elimination step. Mayr recently showed that addition of a  $\pi$ -nucleophile to DDQ can occur either through C or O

attack.<sup>25</sup> Based on our calculations, we predict that both of these processes should be very fast at -78 °C ( $\Delta G_{add}^\ddagger = 3.7$  kcal.mol<sup>-1</sup> for C attack and  $\Delta G_{add}^\ddagger = 6.8$  kcal.mol<sup>-1</sup> for O attack). C attack appears to be kinetically favored but thermodynamically disfavored, in agreement with Mayr's experimental observations. The apparent second-order rate constant for aromatic electrophilic substitution ( $k_C$ ) is given by

$$\frac{1}{k_C} = \frac{1}{k_{diff}} + \frac{1}{K_{CT}k_{add}}$$

where  $k_{diff}$  is the rate constant for diffusion under the experimental conditions ( $k_{diff} \cong (8RT)/(3\eta) = 2 \cdot 10^9$  M<sup>-1</sup>.s<sup>-1</sup> in THF at -78 °C),<sup>26</sup>  $K_{CT}$  is the equilibrium constant for formation of the encounter complex and  $k_{add}$  is the first-order rate constant for electrophilic addition within the charge-transfer complex.

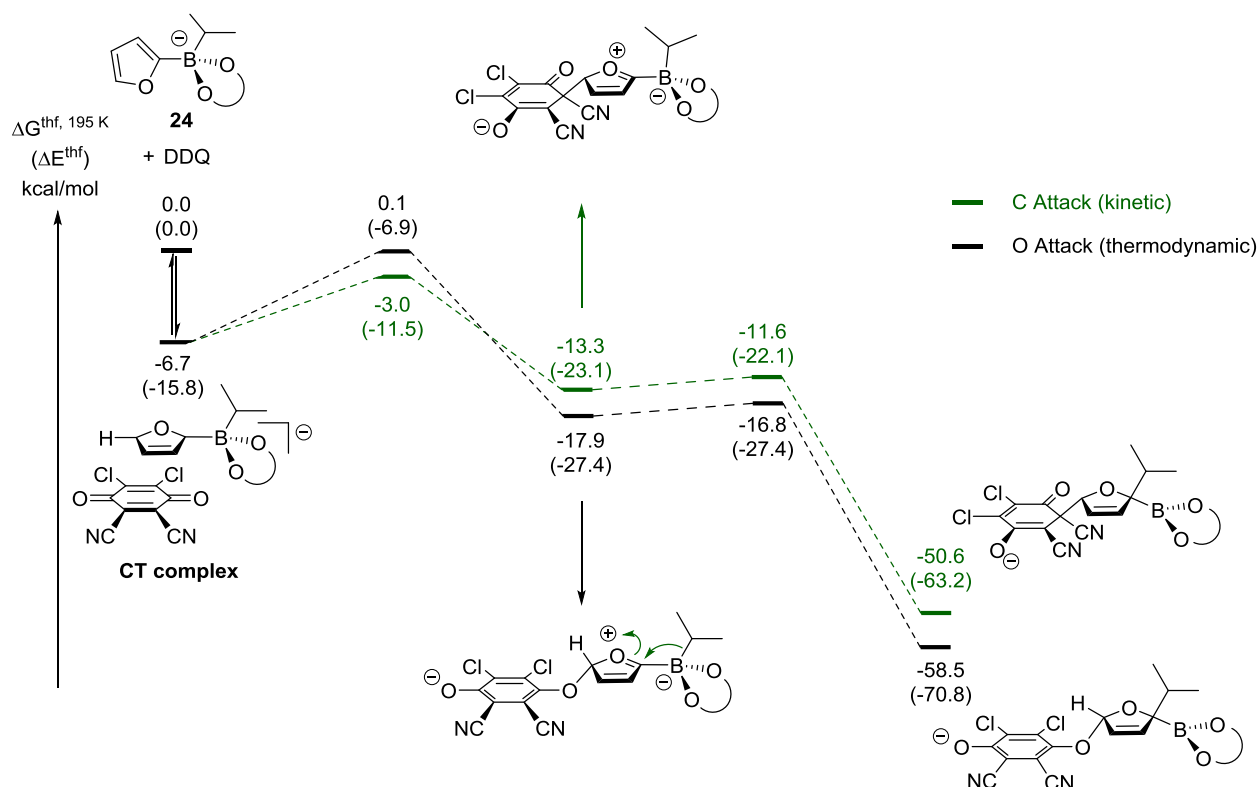

Scheme 3. Computed free energy surfaces for Path C (B3LYP-D2) for **24**.

Computed first- and second-order rate constants for nucleophilic addition of selected boronate complexes to DDQ are summarized below.

<sup>25</sup> Guo, X.; Mayr, H. *J. Am. Chem. Soc.* **2013**, *135*, 12377-12387.

<sup>26</sup> <http://ddbonline.ddbst.de/VogelCalculation/VogelCalculationCGI.exe> (accessed the 24/06/2016).



|    |          | $K_{CT}$<br>( $M^{-1}$ ) | $\Delta G_{add}^\ddagger$<br>( $kcal.mol^{-1}$ ) | $k_{add}$<br>( $s^{-1}$ ) | $k_C$<br>( $M^{-1}.s^{-1}$ ) | $\Delta G_C^\ddagger$<br>( $kcal.mol^{-1}$ ) |
|----|----------|--------------------------|--------------------------------------------------|---------------------------|------------------------------|----------------------------------------------|
| Ia | C attack | $3.4 \cdot 10^7$         | 3.7                                              | $3 \cdot 10^8$            | $2 \cdot 10^9$               | 2.9                                          |
|    | O attack |                          | 6.8                                              | $1 \cdot 10^5$            | $2 \cdot 10^9$               | 2.9                                          |
| Ic | C attack | $6.4 \cdot 10^5$         | 6.9                                              | $8 \cdot 10^4$            | $2 \cdot 10^9$               | 2.9                                          |
|    | O attack |                          | 11.8                                             | $2 \cdot 10^{-1}$         | $2 \cdot 10^5$               | 6.6                                          |

In both cases, the second order rate constant for C attack is found to be equal to  $k_{diff}$ , owing to the exothermicity of the formation of the encounter complex ( $K_{CT} = 10^5$ - $10^7 M^{-1}$ ). On another hand, the first-order rate constant is computed to be significantly slower in the case of the less nucleophilic thiophene-substituted boronate complex.

The calculated potential energy surface for Path D first involves the formation of the encounter complex. This initial step is followed by single electron transfer from the boronate moiety to the DDQ moiety of the complex, which occurs with a rate constant  $k_{ET}$ . DFT calculations have revealed that single-electron oxidation of **24** occurs by removing an electron from the  $\sigma$  C–B bond. The SOMO of the resulting neutral radical complex (single point calculation at the optimized geometry of **24**) is indeed predominantly localized on the boronate moiety, with only very small coefficients on the furan ring (below, left). As one might expect, this molecular orbital corresponds to the HOMO of **24** (below, right). Geometry optimization of the neutral radical complex accordingly led to C–B bond breaking and generated a carbon-centred radical intermediate and the corresponding boronic ester. A relaxed scan along the C-B distance showed that this process is barrierless.

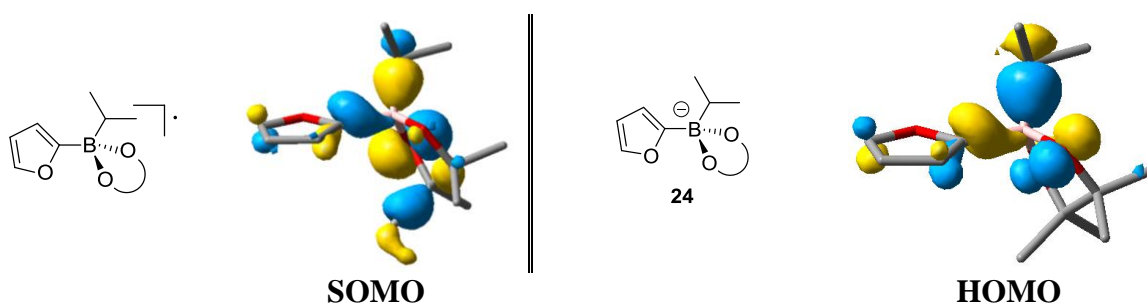

It is possible to connect path D to path C, by locating a transition state associated with addition of the radical formed upon single electron transfer to the boronic ester, as shown in Scheme 4. This transition state lies  $12.6 kcal.mol^{-1}$  above the separated radical and boronic



ester in solvated free energy. This suggests that addition of the radical would be relatively slow, so that this intermediate would be long-lived enough to racemize. Hence this mechanism is inconsistent with (i) the observed stereospecific coupling and (ii) the retention of the cyclopropane unit in some cases.

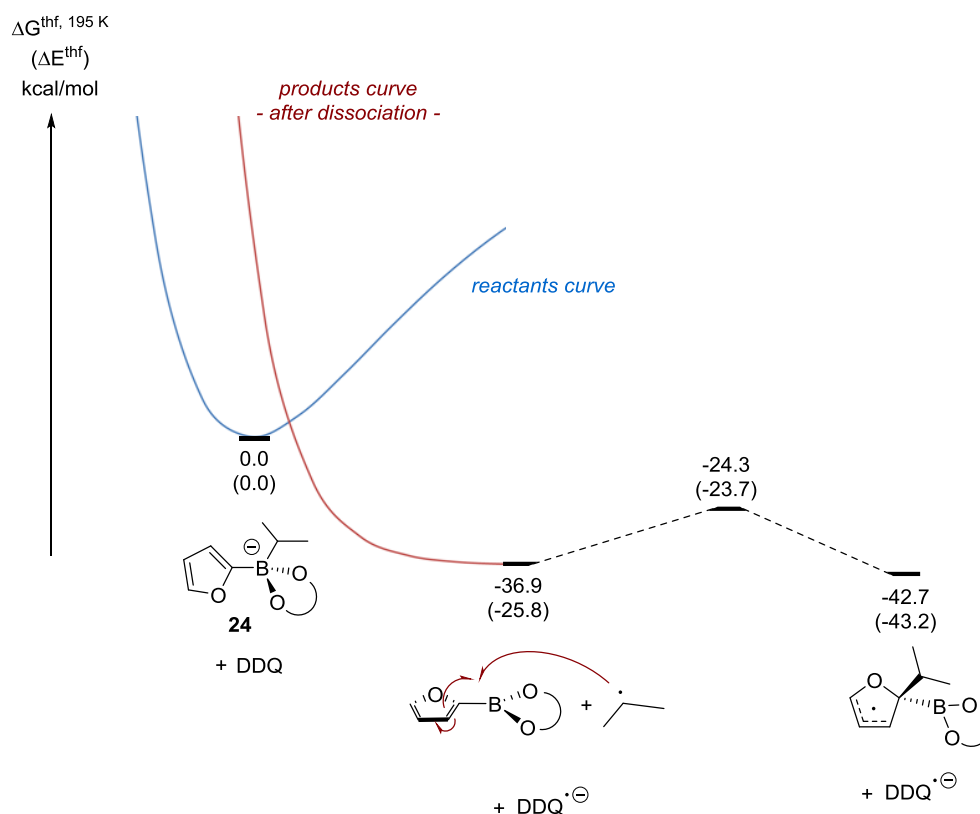

Scheme 4. Computed free energy surface for Path D (B3LYP-D2) for **24**.

The rate constant  $k_{ET}$  was calculated using Marcus-Savéant theory.<sup>27</sup> In this theory, the free energy of activation ( $\Delta G^*$ ) for a concerted dissociative electron transfer is given by

$$\Delta G^* = \frac{\lambda_o + BDE}{4} \left( 1 + \frac{\Delta G^0}{\lambda_o + BDE} \right)^2$$

where  $\lambda_o$  is the solvent reorganization energy,  $BDE$  is the dissociation energy of the C-B bond and  $\Delta G^0$  is the standard free energy of the reaction. The solvent reorganization energy was estimated using Marcus' equation<sup>28</sup>

$$\lambda_o = \Delta e^2 \left( \frac{1}{\epsilon_{opt}} - \frac{1}{\epsilon_s} \right) \left( \frac{1}{2a_1} + \frac{1}{2a_2} - \frac{1}{R} \right)$$

<sup>27</sup> Saveant, J. M. *J. Am. Chem. Soc.* **1987**, *109*, 6788–6795.

<sup>28</sup> Marcus, R. A. *Angew. Chem. Int. Ed.* **1993**, *32*, 1111–1121.

where  $\epsilon_{opt}$  and  $\epsilon_s$  are the optical and static dielectric constants of the solvent ( $\epsilon_{opt} = 1.97$  and  $\epsilon_s = 7.52$  for THF),<sup>29</sup>  $\Delta e$  is the amount of charge transferred (here, 1 atomic unit of charge),  $a_1$  is the radius of the donor (boronate complex)  $a_2$  is the radius of the acceptor (DDQ) and  $R$  is the radius of the charge transfer complex. The radii were obtained based on single-point B3LYP calculations as implemented in Gaussian (using the keyword “volume”, which requests that the molecular volume, *i.e.* the volume enclosed by an electron isodensity surface with the value 0.001 electrons/Bohr<sup>3</sup>, be computed, derives the corresponding radius assuming that the species is a sphere and adds 0.5 Å). The bond dissociation energy was calculated as the difference, in solvated energy, between the boronate complex and the two fragments resulting from the homolytic cleavage of the C-B bond in their relaxed geometries ([furane-B(pin)]<sup>•-</sup> and [R]<sup>•</sup>).

$$BDE = E^{thf}([B]^{•-}) + E^{thf}([R]^{•}) - E^{thf}([B-R]^{-})$$

Finally, the standard free energy of the reaction was calculated as the difference, in solvated free energy, between the initial diabatic state (boronate complex + DDQ) and the final diabatic state ([furane-B(pin)] + [R]<sup>•</sup> + [DDQ]<sup>•-</sup>).

|                                                                                     | $a_1$ (Å) | $a_2$ (Å) | $R$ (Å) | $\lambda_o$<br>(kcal.mol <sup>-1</sup> ) | $BDE$<br>(kcal.mol <sup>-1</sup> ) | $\Delta G^0$<br>(kcal.mol <sup>-1</sup> ) | $\Delta G^*$<br>(kcal.mol <sup>-1</sup> ) |
|-------------------------------------------------------------------------------------|-----------|-----------|---------|------------------------------------------|------------------------------------|-------------------------------------------|-------------------------------------------|
| 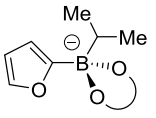 | 4.7       | 5.1       | 6.2     | 5.3                                      | 69.1                               | -36.9                                     | 4.7                                       |
|  | 4.7       | 5.9       | 7.0     | 5.9                                      | 62.5                               | -42.5                                     | 2.5                                       |

In the adiabatic limit, the first-order (intra-complex) rate constant for the electron transfer is given by

$$k_{ET} = \kappa_{el} \nu_n \exp\left(\frac{-\Delta G^*}{RT}\right)$$

where  $\kappa_{el}$  is the electronic transmission coefficient and  $\nu_n$  is the nuclear vibration frequency related to electron transfer ( $\kappa_{el} \nu_n$  was approximated to 10<sup>12</sup> M<sup>-1</sup>.s<sup>-1</sup>). The apparent second-order rate constant for electron transfer ( $k_D$ ) is given by

<sup>29</sup> Lide, D. R. CRC Handbook of Chemistry and Physics Boca Raton, FL, CRC Press, 2008.

$$\frac{1}{k_D} = \frac{1}{k_{diff}} + \frac{1}{K_{CT}k_{ET}}$$

The table below summarizes the results as far as the reactivity towards DDQ is concerned.

|                                                                                   | $K_{CT}$ ( $M^{-1}$ ) | $k_{add}$ ( $s^{-1}$ ) | $k_C$ ( $M^{-1}.s^{-1}$ ) | $k_{ET}$ ( $s^{-1}$ ) | $k_D$ ( $M^{-1}.s^{-1}$ ) | Favored Pathway |
|-----------------------------------------------------------------------------------|-----------------------|------------------------|---------------------------|-----------------------|---------------------------|-----------------|
| 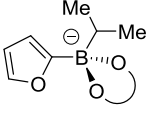 | $3 \times 10^7$       | $3 \times 10^8$        | $k_{diff}$                | $3 \times 10^6$       | $k_{diff}$                | C > D           |
|  | $1 \times 10^7$       | $8 \times 10^7$        | $k_{diff}$                | $2 \times 10^9$       | $k_{diff}$                | D > C           |
|  | $6 \times 10^5$       | $5 \times 10^6$        | $k_{diff}$                | $2 \times 10^8$       | $k_{diff}$                | D > C           |

## Cartesian Coordinates.

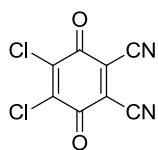

E = -1485.112755 Hartree

|    |           |           |           |
|----|-----------|-----------|-----------|
| C  | -0.309151 | 0.089515  | -0.012886 |
| C  | 1.050908  | 0.089592  | 0.012753  |
| C  | 1.830628  | 1.377696  | 0.027006  |
| C  | 1.050015  | 2.656965  | 0.011899  |
| C  | -0.308520 | 2.656888  | -0.013711 |
| C  | -1.089001 | 1.377530  | -0.028029 |
| O  | -2.303501 | 1.357221  | -0.050898 |
| O  | 3.045128  | 1.357525  | 0.049977  |
| Cl | -1.248087 | 4.095242  | -0.031876 |
| Cl | 1.989436  | 4.095427  | 0.029157  |
| C  | -1.073560 | -1.116519 | -0.026889 |
| C  | 1.815439  | -1.116355 | 0.027574  |
| N  | -1.691113 | -2.101590 | -0.038198 |
| N  | 2.433092  | -2.101355 | 0.039551  |

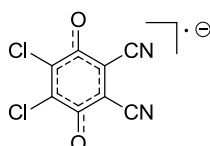

E = -1485.255263 Hartree

|    |           |           |           |
|----|-----------|-----------|-----------|
| C  | -0.330629 | 0.128508  | -0.013367 |
| C  | 1.072385  | 0.128588  | 0.013084  |
| C  | 1.851727  | 1.361148  | 0.027219  |
| C  | 1.054942  | 2.607522  | 0.012061  |
| C  | -0.313443 | 2.607444  | -0.013738 |
| C  | -1.110092 | 1.360979  | -0.028620 |
| O  | -2.356044 | 1.370436  | -0.052435 |
| O  | 3.097691  | 1.370747  | 0.050403  |
| Cl | -1.237423 | 4.087511  | -0.031291 |
| Cl | 1.978758  | 4.087694  | 0.029346  |
| C  | -1.064352 | -1.095229 | -0.026609 |
| C  | 1.806224  | -1.095065 | 0.027511  |
| N  | -1.653333 | -2.101366 | -0.037233 |
| N  | 2.395302  | -2.101135 | 0.039098  |

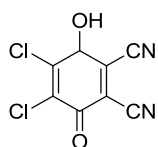

E = -1485.859260 Hartree

|   |           |           |           |
|---|-----------|-----------|-----------|
| C | 1.357354  | -0.749170 | -0.001199 |
| C | 1.337865  | 0.674816  | -0.004273 |
| C | 0.132601  | 1.381263  | -0.005960 |
| C | -1.071357 | 0.642225  | -0.004764 |
| C | -1.084535 | -0.745438 | -0.001918 |
| C | 0.143784  | -1.551681 | 0.000164  |
| O | 0.130010  | -2.801140 | 0.002840  |

|    |           |           |           |
|----|-----------|-----------|-----------|
| O  | 0.172238  | 2.755317  | -0.008525 |
| Cl | -2.588406 | -1.629949 | -0.000686 |
| Cl | -2.576497 | 1.582442  | -0.007288 |
| C  | 2.600051  | -1.441624 | 0.000636  |
| C  | 2.557228  | 1.424520  | -0.005800 |
| N  | 3.626518  | -1.998145 | 0.002542  |
| N  | 3.544113  | 2.043699  | -0.007217 |
| H  | -0.738833 | 3.092492  | -0.010754 |

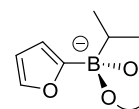

24

E = -759.353569 Hartree

|   |           |           |           |
|---|-----------|-----------|-----------|
| C | 1.513237  | -0.892359 | -0.730242 |
| C | 1.785884  | -0.363759 | 0.731669  |
| C | 0.851684  | -2.287791 | -0.732288 |
| H | 0.521667  | -2.507890 | -1.755819 |
| H | 1.557035  | -3.068006 | -0.409544 |
| H | -0.024507 | -2.302606 | -0.078400 |
| C | 2.763828  | -0.954710 | -1.615808 |
| H | 3.525211  | -1.614096 | -1.172864 |
| H | 2.489569  | -1.352362 | -2.602410 |
| H | 3.193299  | 0.043075  | -1.754004 |
| C | 2.932930  | 0.666334  | 0.762583  |
| H | 2.939036  | 1.146816  | 1.749866  |
| H | 3.911768  | 0.194050  | 0.590457  |
| H | 2.769898  | 1.436049  | 0.003511  |
| C | 2.100507  | -1.471533 | 1.746515  |
| H | 2.990213  | -2.044115 | 1.443064  |
| H | 2.295209  | -1.019671 | 2.728963  |
| H | 1.252945  | -2.157709 | 1.843925  |
| C | -1.632618 | -0.267795 | 0.020669  |
| C | -2.183501 | -1.004287 | 1.042186  |
| O | -2.559855 | -0.234671 | -1.011894 |
| C | -3.486117 | -1.446843 | 0.625523  |
| H | -1.688696 | -1.193190 | 1.986534  |
| C | -3.659849 | -0.947665 | -0.634640 |
| H | -4.197087 | -2.049946 | 1.180161  |
| H | -4.461089 | -1.010099 | -1.359176 |
| C | -0.581115 | 2.161451  | -0.348262 |
| H | -1.210882 | 2.232441  | -1.252860 |
| C | 0.668681  | 3.023657  | -0.576417 |
| H | 1.286585  | 3.041744  | 0.333335  |
| H | 1.280775  | 2.614705  | -1.391456 |
| H | 0.408866  | 4.070007  | -0.820844 |
| C | -1.383588 | 2.727453  | 0.835159  |
| H | -1.622894 | 3.798433  | 0.701927  |
| H | -2.324971 | 2.179232  | 0.979329  |
| H | -0.797853 | 2.624730  | 1.761482  |
| B | -0.231773 | 0.568741  | -0.135696 |
| O | 0.624816  | 0.069515  | -1.255862 |
| O | 0.580491  | 0.275835  | 1.095710  |

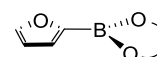

E = -640.770657 Hartree

|   |           |           |           |
|---|-----------|-----------|-----------|
| C | 2.076643  | -0.235233 | -0.758780 |
| C | 2.069251  | -0.297003 | 0.810809  |
| C | 2.633289  | -1.508270 | -1.404481 |
| H | 2.434738  | -1.474556 | -2.481282 |
| H | 3.715112  | -1.587335 | -1.244710 |
| H | 2.150255  | -2.399344 | -0.987467 |
| C | 2.756131  | 0.995461  | -1.346473 |
| H | 3.812954  | 1.019645  | -1.050892 |
| H | 2.701622  | 0.955195  | -2.440329 |
| H | 2.272613  | 1.916182  | -1.008239 |
| C | 2.012089  | 1.088152  | 1.463130  |
| H | 1.820952  | 0.967013  | 2.535124  |
| H | 2.959769  | 1.623189  | 1.330103  |
| H | 1.205244  | 1.689639  | 1.029067  |
| C | 3.194055  | -1.122696 | 1.423030  |
| H | 4.166915  | -0.691172 | 1.154630  |
| H | 3.100467  | -1.115525 | 2.515071  |
| H | 3.159574  | -2.159743 | 1.077663  |
| C | -1.511065 | -1.065066 | 0.015765  |
| C | -2.336753 | -1.535039 | 1.009738  |
| O | -2.259824 | -0.898531 | -1.134042 |
| C | -3.646203 | -1.664234 | 0.451927  |
| H | -2.025810 | -1.758203 | 2.022259  |
| C | -3.532495 | -1.262362 | -0.851136 |
| H | -4.546870 | -2.006139 | 0.944981  |
| H | -4.238391 | -1.182719 | -1.665836 |
| B | -0.009182 | -0.728221 | -0.004335 |
| O | 0.655232  | -0.185319 | -1.075376 |
| O | 0.797403  | -0.950953 | 1.088845  |

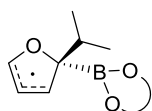

E = -59.287188 Hartree

|   |           |           |           |
|---|-----------|-----------|-----------|
| C | 1.853078  | -1.237411 | -0.380394 |
| C | 2.031675  | -0.259922 | 0.834383  |
| C | 1.515977  | -2.669161 | 0.046664  |
| H | 1.224422  | -3.242227 | -0.840200 |
| H | 2.381572  | -3.153397 | 0.513955  |
| H | 0.681175  | -2.677449 | 0.756825  |
| C | 3.007090  | -1.238470 | -1.374786 |
| H | 3.931549  | -1.563250 | -0.880060 |
| H | 2.785150  | -1.936478 | -2.189892 |
| H | 3.164427  | -0.244402 | -1.802765 |
| C | 2.842127  | 0.992007  | 0.483861  |
| H | 2.763922  | 1.707367  | 1.310100  |
| H | 3.898837  | 0.744936  | 0.328822  |
| H | 2.455275  | 1.465049  | -0.425874 |
| C | 2.576559  | -0.905505 | 2.101918  |
| H | 3.578033  | -1.314596 | 1.916394  |
| H | 2.650923  | -0.151333 | 2.893764  |
| H | 1.923919  | -1.711526 | 2.448882  |
| C | -1.523970 | 0.517323  | -0.279628 |
| C | -2.420892 | -0.305473 | 0.614417  |
| O | -1.979047 | 0.155768  | -1.636019 |
| C | -3.275080 | -1.047689 | -0.194286 |

|   |           |           |           |
|---|-----------|-----------|-----------|
| H | -2.347992 | -0.311868 | 1.693341  |
| C | -2.988468 | -0.748317 | -1.517805 |
| H | -4.040780 | -1.742013 | 0.132776  |
| H | -3.419544 | -1.102037 | -2.444675 |
| C | -1.692044 | 2.056233  | -0.140254 |
| H | -2.731635 | 2.263188  | -0.430681 |
| C | -0.748203 | 2.792963  | -1.100815 |
| H | 0.298746  | 2.635439  | -0.802110 |
| H | -0.872233 | 2.433925  | -2.128598 |
| H | -0.942784 | 3.873138  | -1.077934 |
| C | -1.481353 | 2.532336  | 1.303243  |
| H | -1.634653 | 3.617980  | 1.358507  |
| H | -2.189049 | 2.051410  | 1.989135  |
| H | -0.464431 | 2.307748  | 1.644306  |
| B | -0.031334 | -0.000158 | -0.094257 |
| O | 0.665433  | -0.704326 | -1.036968 |
| O | 0.662992  | 0.179903  | 1.079042  |

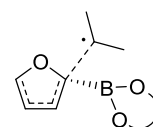

E = -759.256113 Hartree

|   |           |           |           |
|---|-----------|-----------|-----------|
| C | 2.180590  | -0.499182 | -0.839860 |
| C | 2.191411  | 0.181678  | 0.575188  |
| C | 2.619370  | -1.966403 | -0.799366 |
| H | 2.404402  | -2.425575 | -1.770403 |
| H | 3.693562  | -2.049800 | -0.596255 |
| H | 2.070792  | -2.513988 | -0.024523 |
| C | 2.952706  | 0.254768  | -1.915746 |
| H | 4.011658  | 0.330804  | -1.637197 |
| H | 2.880497  | -0.287973 | -2.865077 |
| H | 2.551777  | 1.262066  | -2.060315 |
| C | 2.258445  | 1.710958  | 0.501824  |
| H | 2.079676  | 2.122355  | 1.501249  |
| H | 3.243478  | 2.043325  | 0.153958  |
| H | 1.494464  | 2.103769  | -0.178079 |
| C | 3.253746  | -0.347891 | 1.529906  |
| H | 4.254364  | -0.174747 | 1.113446  |
| H | 3.180955  | 0.178120  | 2.488834  |
| H | 3.126207  | -1.418952 | 1.710191  |
| C | -1.461192 | -0.534090 | 0.124808  |
| C | -2.244321 | -0.804230 | 1.270520  |
| O | -2.156020 | -1.039450 | -0.979656 |
| C | -3.462028 | -1.370726 | 0.826721  |
| H | -1.948321 | -0.579139 | 2.285975  |
| C | -3.363339 | -1.489872 | -0.538985 |
| H | -4.309174 | -1.669673 | 1.431409  |
| H | -4.035062 | -1.862034 | -1.299281 |
| C | -1.580439 | 1.646463  | -0.190319 |
| H | -0.761614 | 1.789610  | -0.898404 |
| C | -1.375258 | 2.254047  | 1.169641  |
| H | -2.168156 | 1.924773  | 1.855463  |
| H | -0.407618 | 1.975476  | 1.600971  |
| H | -1.423189 | 3.356134  | 1.117930  |
| C | -2.952113 | 1.786286  | -0.786469 |
| H | -3.207556 | 2.852164  | -0.927136 |
| H | -3.025289 | 1.288792  | -1.759367 |
| H | -3.707503 | 1.354236  | -0.116107 |

|   |          |           |           |
|---|----------|-----------|-----------|
| B | 0.071310 | -0.408336 | 0.002255  |
| O | 0.765658 | -0.487553 | -1.180360 |
| O | 0.874613 | -0.163701 | 1.093879  |

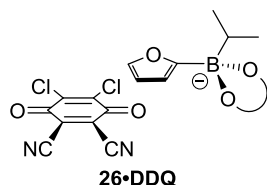

26-DDQ

E = -2244.514690 Hartree

|    |           |           |           |
|----|-----------|-----------|-----------|
| C  | 3.261186  | 0.361359  | -1.406204 |
| C  | 4.156899  | -0.701465 | -0.675927 |
| C  | 2.250001  | -0.304112 | -2.353042 |
| H  | 1.517409  | 0.443701  | -2.674452 |
| H  | 2.749431  | -0.718947 | -3.239969 |
| H  | 1.707153  | -1.102132 | -1.841478 |
| C  | 4.048744  | 1.424708  | -2.175273 |
| H  | 4.682420  | 0.956586  | -2.942424 |
| H  | 3.349148  | 2.108741  | -2.673404 |
| H  | 4.680500  | 2.008736  | -1.498283 |
| C  | 5.448237  | -0.075013 | -0.114614 |
| H  | 5.912663  | -0.791211 | 0.574809  |
| H  | 6.162100  | 0.161373  | -0.916446 |
| H  | 5.219876  | 0.843577  | 0.434978  |
| C  | 4.526144  | -1.912952 | -1.536160 |
| H  | 5.069422  | -1.596852 | -2.438359 |
| H  | 5.171574  | -2.589112 | -0.959676 |
| H  | 3.628926  | -2.462716 | -1.837115 |
| C  | 0.936726  | -0.682000 | 0.929268  |
| C  | 0.560337  | -2.031082 | 1.020665  |
| O  | -0.123363 | 0.062295  | 1.392247  |
| C  | -0.740886 | -2.095721 | 1.549078  |
| H  | 1.206618  | -2.847099 | 0.729670  |
| C  | -1.140068 | -0.783442 | 1.722218  |
| H  | -1.346400 | -2.973303 | 1.732421  |
| H  | -2.033392 | -0.326163 | 2.122361  |
| C  | 2.804869  | 0.678822  | 2.220122  |
| H  | 3.881643  | 0.880303  | 2.106743  |
| C  | 2.631081  | -0.268119 | 3.415220  |
| H  | 1.565614  | -0.473338 | 3.600961  |
| H  | 3.128903  | -1.228961 | 3.226290  |
| H  | 3.047211  | 0.163680  | 4.341675  |
| C  | 2.095220  | 2.015860  | 2.467844  |
| H  | 2.489420  | 2.516323  | 3.370245  |
| H  | 2.226513  | 2.687514  | 1.610054  |
| H  | 1.017369  | 1.868626  | 2.617571  |
| B  | 2.415503  | -0.010707 | 0.748082  |
| O  | 2.575059  | 0.987071  | -0.327530 |
| O  | 3.334473  | -1.126355 | 0.400432  |
| O  | -0.750241 | -0.973019 | -1.384373 |
| C  | -1.777264 | -0.485765 | -0.916903 |
| C  | -2.939176 | -1.328337 | -0.544481 |
| C  | -1.958139 | 0.988593  | -0.761597 |
| C  | -4.150208 | -0.780438 | -0.177496 |
| C  | -3.149605 | 1.523390  | -0.368483 |
| C  | -4.331914 | 0.685135  | -0.047306 |
| O  | -5.406727 | 1.165762  | 0.309053  |
| Cl | -0.582903 | 1.937510  | -1.156181 |

|    |           |           |           |
|----|-----------|-----------|-----------|
| Cl | -3.386744 | 3.235931  | -0.210279 |
| C  | -5.279555 | -1.597812 | 0.129768  |
| C  | -2.786775 | -2.741290 | -0.707508 |
| N  | -2.692657 | -3.892768 | -0.843051 |
| N  | -6.195099 | -2.272236 | 0.380606  |

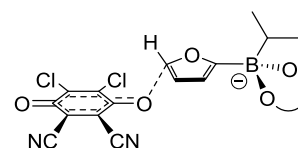

E = -2244.498072 Hartree

|   |           |           |           |
|---|-----------|-----------|-----------|
| C | -3.640199 | -1.292992 | -1.259307 |
| C | -4.602572 | -0.080645 | -1.529195 |
| C | -2.283666 | -1.119252 | -1.967011 |
| H | -1.580644 | -1.857132 | -1.563787 |
| H | -2.374969 | -1.265929 | -3.051842 |
| H | -1.871854 | -0.120599 | -1.786869 |
| C | -4.227603 | -2.658065 | -1.618385 |
| H | -4.498825 | -2.694528 | -2.683027 |
| H | -3.483542 | -3.440472 | -1.421349 |
| H | -5.117481 | -2.866480 | -1.015886 |
| C | -6.063359 | -0.428984 | -1.189138 |
| H | -6.652166 | 0.496889  | -1.191765 |
| H | -6.496094 | -1.127352 | -1.919121 |
| H | -6.118001 | -0.878799 | -0.191871 |
| C | -4.530137 | 0.475281  | -2.952348 |
| H | -4.795452 | -0.299776 | -3.685693 |
| H | -5.236958 | 1.308953  | -3.056742 |
| H | -3.524170 | 0.844948  | -3.174397 |
| C | -1.986868 | 0.844588  | 0.672724  |
| C | -1.524031 | 2.164716  | 0.452783  |
| O | -0.987117 | 0.148993  | 1.287387  |
| C | -0.218917 | 2.245638  | 0.905940  |
| H | -2.118541 | 2.929682  | -0.027245 |
| C | 0.119018  | 0.939846  | 1.351491  |
| H | 0.470700  | 3.076468  | 0.835028  |
| H | 0.889041  | 0.607366  | 2.032172  |
| C | -4.232869 | 0.430319  | 1.963347  |
| H | -5.221789 | -0.002602 | 1.739936  |
| C | -4.425256 | 1.905428  | 2.332995  |
| H | -3.464402 | 2.372196  | 2.598439  |
| H | -4.848711 | 2.463986  | 1.487693  |
| H | -5.097412 | 2.021382  | 3.199812  |
| C | -3.601942 | -0.360648 | 3.113169  |
| H | -4.225356 | -0.318120 | 4.022736  |
| H | -3.464260 | -1.412361 | 2.831793  |
| H | -2.613912 | 0.046779  | 3.374080  |
| B | -3.457758 | 0.200651  | 0.500087  |
| O | -3.454495 | -1.225037 | 0.150461  |
| O | -4.143004 | 0.905629  | -0.612321 |
| O | 1.118765  | 0.352509  | -0.291394 |
| C | 2.379795  | 0.167493  | -0.172858 |
| C | 3.318572  | 1.188813  | -0.559909 |
| C | 2.927361  | -1.060086 | 0.382958  |
| C | 4.695164  | 0.982952  | -0.506320 |
| C | 4.280494  | -1.281936 | 0.449180  |
| C | 5.268331  | -0.278915 | -0.006575 |
| O | 6.487731  | -0.476611 | 0.036299  |

|    |          |           |           |
|----|----------|-----------|-----------|
| Cl | 1.762045 | -2.223557 | 0.941838  |
| Cl | 4.943029 | -2.762746 | 1.070427  |
| C  | 5.610845 | 1.991677  | -0.926794 |
| C  | 2.766793 | 2.441210  | -0.977911 |
| N  | 2.305251 | 3.467972  | -1.273799 |
| N  | 6.349449 | 2.824420  | -1.271379 |

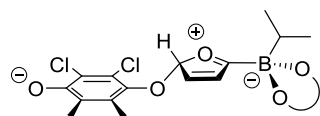

E = -2244.523986 Hartree

|   |           |           |           |
|---|-----------|-----------|-----------|
| C | 3.233788  | 0.530424  | -1.079528 |
| C | 4.137194  | -0.741711 | -0.894789 |
| C | 1.989783  | 0.230993  | -1.935131 |
| H | 1.280960  | 1.059633  | -1.827978 |
| H | 2.250275  | 0.114203  | -2.995113 |
| H | 1.497011  | -0.691099 | -1.604412 |
| C | 3.960509  | 1.746860  | -1.650457 |
| H | 4.381644  | 1.516232  | -2.638899 |
| H | 3.253753  | 2.579166  | -1.758224 |
| H | 4.768196  | 2.063915  | -0.983249 |
| C | 5.547942  | -0.369860 | -0.406477 |
| H | 6.062652  | -1.286722 | -0.093979 |
| H | 6.134986  | 0.115201  | -1.197972 |
| H | 5.481464  | 0.307452  | 0.451728  |
| C | 4.241993  | -1.625671 | -2.137739 |
| H | 4.671353  | -1.061632 | -2.977665 |
| H | 4.893960  | -2.483058 | -1.925955 |
| H | 3.258005  | -2.004291 | -2.432535 |
| C | 1.173505  | -1.036665 | 0.986870  |
| C | 0.808703  | -2.452421 | 1.072501  |
| O | 0.118115  | -0.292794 | 1.172187  |
| C | -0.503773 | -2.535028 | 1.341347  |
| H | 1.536692  | -3.239368 | 0.929032  |
| C | -1.064870 | -1.148681 | 1.458991  |
| H | -1.138337 | -3.402810 | 1.479979  |
| H | -1.354616 | -0.885180 | 2.482916  |
| C | 3.144488  | -0.377283 | 2.523603  |
| H | 4.186859  | -0.041402 | 2.396338  |
| C | 3.166356  | -1.719030 | 3.267647  |
| H | 2.145999  | -2.076870 | 3.475887  |
| H | 3.679354  | -2.486560 | 2.672790  |
| H | 3.679676  | -1.632230 | 4.238336  |
| C | 2.380293  | 0.692319  | 3.310866  |
| H | 2.826166  | 0.856247  | 4.305255  |
| H | 2.373442  | 1.645351  | 2.768077  |
| H | 1.333118  | 0.393880  | 3.470415  |
| B | 2.685464  | -0.471653 | 0.926716  |
| O | 2.833629  | 0.815960  | 0.258571  |
| O | 3.471260  | -1.458799 | 0.143121  |
| O | -2.072577 | -0.904875 | 0.550077  |
| C | -3.140066 | -0.115374 | 0.980261  |
| C | -4.108822 | -0.675306 | 1.817856  |
| C | -3.294390 | 1.206662  | 0.512579  |
| C | -5.239555 | 0.069692  | 2.228393  |
| C | -4.401795 | 1.954605  | 0.888399  |
| C | -5.458935 | 1.442084  | 1.779945  |
| O | -6.444960 | 2.122139  | 2.115321  |

|    |           |           |           |
|----|-----------|-----------|-----------|
| Cl | -2.052885 | 1.842997  | -0.544125 |
| Cl | -4.615345 | 3.586464  | 0.321194  |
| C  | -6.203893 | -0.518231 | 3.092748  |
| C  | -3.889335 | -2.024133 | 2.245646  |
| N  | -3.615905 | -3.112440 | 2.559434  |
| N  | -6.979963 | -1.023780 | 3.802894  |

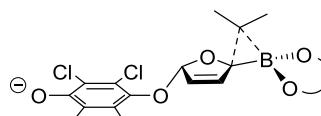

E = -2244.522441 Hartree

|   |           |           |           |
|---|-----------|-----------|-----------|
| C | 4.239309  | 1.658088  | -0.353173 |
| C | 5.193338  | 0.437394  | -0.606998 |
| C | 3.596801  | 2.169497  | -1.652355 |
| H | 2.806358  | 2.883376  | -1.395035 |
| H | 4.334234  | 2.666666  | -2.295701 |
| H | 3.147112  | 1.339479  | -2.209136 |
| C | 4.880966  | 2.821338  | 0.398700  |
| H | 5.731495  | 3.224503  | -0.168243 |
| H | 4.141602  | 3.620174  | 0.532426  |
| H | 5.229764  | 2.504633  | 1.386544  |
| C | 6.162867  | 0.201423  | 0.562669  |
| H | 6.638879  | -0.777872 | 0.432529  |
| H | 6.943127  | 0.973128  | 0.595360  |
| H | 5.627656  | 0.208070  | 1.517830  |
| C | 5.981585  | 0.511189  | -1.913551 |
| H | 6.612386  | 1.410436  | -1.929708 |
| H | 6.629407  | -0.370022 | -2.003575 |
| H | 5.307531  | 0.535267  | -2.775010 |
| C | 1.757917  | -0.903231 | -0.359184 |
| C | 1.532241  | -2.241348 | -0.906303 |
| O | 0.588017  | -0.376344 | -0.002375 |
| C | 0.220891  | -2.514922 | -0.840695 |
| H | 2.335343  | -2.860466 | -1.283488 |
| C | -0.489335 | -1.338305 | -0.232056 |
| H | -0.324290 | -3.395562 | -1.158322 |
| H | -0.943352 | -1.546994 | 0.742669  |
| C | 2.975481  | -1.345649 | 1.591319  |
| H | 3.769288  | -0.716258 | 2.011525  |
| C | 3.490206  | -2.770362 | 1.427908  |
| H | 2.688632  | -3.451170 | 1.111427  |
| H | 4.301066  | -2.810827 | 0.690561  |
| H | 3.876108  | -3.149262 | 2.388351  |
| C | 1.749299  | -1.249500 | 2.485985  |
| H | 1.995143  | -1.571891 | 3.510267  |
| H | 1.363723  | -0.224489 | 2.528492  |
| H | 0.944035  | -1.905815 | 2.127103  |
| B | 3.104181  | -0.289517 | 0.067645  |
| O | 3.212773  | 1.082555  | 0.463903  |
| O | 4.277491  | -0.664282 | -0.679843 |
| O | -1.428447 | -0.796283 | -1.109903 |
| C | -2.610817 | -0.325743 | -0.550174 |
| C | -3.592887 | -1.236387 | -0.148757 |
| C | -2.864372 | 1.059755  | -0.447978 |
| C | -4.831272 | -0.797706 | 0.380411  |
| C | -4.075697 | 1.516694  | 0.053745  |
| C | -5.151211 | 0.619903  | 0.512699  |
| O | -6.231008 | 1.040026  | 0.968751  |

|    |           |           |           |
|----|-----------|-----------|-----------|
| Cl | -1.606949 | 2.155570  | -0.980416 |
| Cl | -4.407847 | 3.222796  | 0.181564  |
| C  | -5.806344 | -1.746972 | 0.793625  |
| C  | -3.280991 | -2.627419 | -0.286478 |
| N  | -2.945487 | -3.736289 | -0.411031 |
| N  | -6.590274 | -2.544990 | 1.127290  |

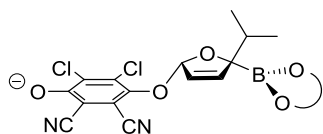

E = -2244.586571 Hartree

|   |           |           |           |
|---|-----------|-----------|-----------|
| C | 3.398484  | 1.638719  | -0.559289 |
| C | 4.616703  | 0.720214  | -0.924852 |
| C | 2.416754  | 1.826850  | -1.720801 |
| H | 1.504664  | 2.293212  | -1.336939 |
| H | 2.853411  | 2.462481  | -2.501066 |
| H | 2.141714  | 0.860463  | -2.157670 |
| C | 3.767907  | 2.986383  | 0.047292  |
| H | 4.353079  | 3.576474  | -0.670581 |
| H | 2.851219  | 3.536793  | 0.286392  |
| H | 4.350649  | 2.863360  | 0.965051  |
| C | 5.808867  | 0.902464  | 0.020171  |
| H | 6.537054  | 0.105174  | -0.168443 |
| H | 6.293525  | 1.872898  | -0.141822 |
| H | 5.484936  | 0.842533  | 1.065638  |
| C | 5.069877  | 0.807435  | -2.376763 |
| H | 5.404451  | 1.827744  | -2.606293 |
| H | 5.908243  | 0.120099  | -2.542438 |
| H | 4.258099  | 0.540511  | -3.059073 |
| C | 2.271047  | -1.716023 | 0.817635  |
| C | 2.000834  | -2.711219 | -0.287607 |
| O | 0.937886  | -1.348470 | 1.264579  |
| C | 0.695991  | -2.757877 | -0.555490 |
| H | 2.799457  | -3.243073 | -0.794369 |
| C | -0.013561 | -1.749246 | 0.308243  |
| H | 0.173168  | -3.325235 | -1.316310 |
| H | -0.909204 | -2.102180 | 0.830973  |
| C | 3.046679  | -2.314738 | 2.020443  |
| H | 4.029720  | -2.613751 | 1.625729  |
| C | 2.344472  | -3.551988 | 2.595603  |
| H | 1.347477  | -3.277001 | 2.959305  |
| H | 2.225260  | -4.336500 | 1.838848  |
| H | 2.923227  | -3.958804 | 3.435881  |
| C | 3.255749  | -1.259818 | 3.118362  |
| H | 3.807950  | -1.691483 | 3.964080  |
| H | 3.815313  | -0.391465 | 2.746248  |
| H | 2.284593  | -0.900598 | 3.478674  |
| B | 3.023564  | -0.461757 | 0.195757  |
| O | 2.713336  | 0.842904  | 0.446084  |
| O | 4.080638  | -0.612268 | -0.677618 |
| O | -0.403834 | -0.647571 | -0.544589 |
| C | -1.658859 | -0.113684 | -0.345849 |
| C | -2.791917 | -0.779320 | -0.827915 |
| C | -1.830886 | 1.139105  | 0.291098  |
| C | -4.095158 | -0.236758 | -0.680264 |
| C | -3.092475 | 1.701283  | 0.432561  |
| C | -4.325469 | 1.050768  | -0.038267 |
| O | -5.455474 | 1.560512  | 0.101892  |

|    |           |           |           |
|----|-----------|-----------|-----------|
| Cl | -0.390276 | 1.941076  | 0.884471  |
| Cl | -3.304319 | 3.253432  | 1.205193  |
| C  | -5.224797 | -0.946964 | -1.172421 |
| C  | -2.585123 | -2.039015 | -1.477329 |
| N  | -2.369445 | -3.063922 | -1.988069 |
| N  | -6.139533 | -1.546078 | -1.582261 |

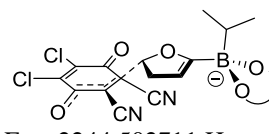

E = -2244.502711 Hartree

|   |           |           |           |
|---|-----------|-----------|-----------|
| C | -3.689603 | -0.655040 | -1.110060 |
| C | -4.650917 | 0.281707  | -0.292694 |
| C | -2.700499 | 0.151297  | -1.967116 |
| H | -1.902196 | -0.513800 | -2.314021 |
| H | -3.200672 | 0.599993  | -2.836049 |
| H | -2.242431 | 0.958989  | -1.388742 |
| C | -4.401994 | -1.685334 | -1.986547 |
| H | -5.046498 | -1.185598 | -2.723630 |
| H | -3.654974 | -2.282131 | -2.525279 |
| H | -5.012131 | -2.360358 | -1.377120 |
| C | -5.884073 | -0.480644 | 0.225171  |
| H | -6.403772 | 0.151201  | 0.956450  |
| H | -6.579904 | -0.729194 | -0.588473 |
| H | -5.569600 | -1.406226 | 0.719464  |
| C | -5.102810 | 1.532667  | -1.047977 |
| H | -5.646328 | 1.257338  | -1.963273 |
| H | -5.773263 | 2.124375  | -0.410361 |
| H | -4.243793 | 2.153981  | -1.319158 |
| C | -1.371264 | 0.325948  | 1.089439  |
| C | -0.987486 | 1.576139  | 1.645147  |
| O | -0.244139 | -0.364991 | 0.804910  |
| C | 0.390345  | 1.632543  | 1.668514  |
| H | -1.697253 | 2.331637  | 1.952168  |
| C | 0.859603  | 0.425729  | 1.073544  |
| H | 1.027050  | 2.456589  | 1.967720  |
| H | 1.750884  | -0.133854 | 1.327385  |
| C | -2.989249 | -1.165255 | 2.488701  |
| H | -3.993785 | -1.604158 | 2.372568  |
| C | -3.014966 | -0.221826 | 3.696810  |
| H | -2.018790 | 0.209664  | 3.879385  |
| H | -3.714825 | 0.606934  | 3.525240  |
| H | -3.316708 | -0.748680 | 4.617735  |
| C | -1.982435 | -2.302744 | 2.687073  |
| H | -2.223530 | -2.907015 | 3.578318  |
| H | -1.963531 | -2.962573 | 1.810447  |
| H | -0.965441 | -1.906326 | 2.827818  |
| B | -2.826107 | -0.383848 | 1.019758  |
| O | -2.983430 | -1.338884 | -0.077973 |
| O | -3.853092 | 0.666527  | 0.822839  |
| O | 0.858590  | -0.603666 | -2.140449 |
| C | 1.737420  | -0.240680 | -1.381779 |
| C | 1.739815  | 1.131045  | -0.751348 |
| C | 2.880632  | -1.116829 | -0.995421 |
| C | 2.984504  | 1.708278  | -0.364268 |
| C | 4.001314  | -0.587004 | -0.443100 |
| C | 4.155877  | 0.891708  | -0.141581 |
| O | 5.235259  | 1.321368  | 0.274949  |



|    |           |           |           |
|----|-----------|-----------|-----------|
| Cl | 2.711440  | -2.793825 | -1.403416 |
| Cl | 5.379053  | -1.562967 | -0.058859 |
| C  | 3.040399  | 3.071662  | 0.024170  |
| C  | 0.689077  | 1.985709  | -1.241648 |
| N  | -0.168058 | 2.674307  | -1.616761 |
| N  | 3.040932  | 4.188517  | 0.364230  |

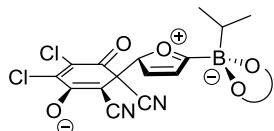

E = -2244.516369 Hartree

|   |           |           |           |
|---|-----------|-----------|-----------|
| C | -2.835259 | 1.586385  | -0.222646 |
| C | -3.954456 | 0.822185  | 0.573165  |
| C | -1.674971 | 2.015980  | 0.690713  |
| H | -0.823556 | 2.317036  | 0.070448  |
| H | -1.964806 | 2.856177  | 1.334944  |
| H | -1.349968 | 1.197179  | 1.341033  |
| C | -3.333612 | 2.795262  | -1.012918 |
| H | -3.807169 | 3.525094  | -0.341385 |
| H | -2.485432 | 3.280437  | -1.512104 |
| H | -4.056875 | 2.490065  | -1.775995 |
| C | -5.272013 | 0.757262  | -0.219399 |
| H | -5.945789 | 0.048928  | 0.278582  |
| H | -5.763134 | 1.738768  | -0.270842 |
| H | -5.077996 | 0.403523  | -1.237920 |
| C | -4.223163 | 1.379352  | 1.971151  |
| H | -4.544177 | 2.429159  | 1.912637  |
| H | -5.020951 | 0.798293  | 2.452262  |
| H | -3.325658 | 1.319279  | 2.594469  |
| C | -1.064299 | -1.167004 | 0.226587  |
| C | -0.891548 | -2.062950 | 1.351153  |
| O | 0.103116  | -0.952406 | -0.340554 |
| C | 0.418509  | -2.374591 | 1.455313  |
| H | -1.715128 | -2.373440 | 1.979414  |
| C | 1.153527  | -1.671187 | 0.368533  |
| H | 0.913893  | -2.977037 | 2.207878  |
| H | 1.620405  | -2.339768 | -0.360746 |
| C | -2.874975 | -1.918072 | -1.463860 |
| H | -3.831944 | -1.531315 | -1.851379 |
| C | -3.148761 | -3.260416 | -0.773771 |
| H | -2.213926 | -3.722651 | -0.420187 |
| H | -3.807370 | -3.122689 | 0.094106  |
| H | -3.623748 | -3.979365 | -1.460798 |
| C | -1.905063 | -2.076825 | -2.640168 |
| H | -2.300368 | -2.770957 | -3.400019 |
| H | -1.709622 | -1.108269 | -3.116830 |
| H | -0.938481 | -2.482385 | -2.303243 |
| B | -2.462293 | -0.680653 | -0.428826 |
| O | -2.383210 | 0.589749  | -1.138794 |
| O | -3.427821 | -0.499737 | 0.680989  |
| O | 2.342340  | 1.204657  | -0.637045 |
| C | 2.761476  | 0.094364  | -0.387733 |
| C | 2.299918  | -0.692841 | 0.870388  |
| C | 3.682860  | -0.649273 | -1.280208 |
| C | 3.394592  | -1.554866 | 1.473534  |
| C | 4.447125  | -1.657874 | -0.788199 |
| C | 4.427365  | -2.110710 | 0.675986  |
| O | 5.296315  | -2.913118 | 1.052756  |

|    |          |           |           |
|----|----------|-----------|-----------|
| Cl | 3.795500 | -0.051117 | -2.913237 |
| Cl | 5.583714 | -2.489617 | -1.791749 |
| C  | 3.219505 | -2.014564 | 2.793010  |
| C  | 1.724643 | 0.260289  | 1.832631  |
| N  | 1.244454 | 0.983087  | 2.601880  |
| N  | 2.990009 | -2.393105 | 3.877769  |

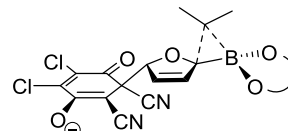

E = -2244.511986 Hartree

|   |           |           |           |
|---|-----------|-----------|-----------|
| C | -4.054640 | -0.565457 | -1.487748 |
| C | -4.857728 | 0.300883  | -0.453325 |
| C | -3.505143 | 0.275707  | -2.650038 |
| H | -2.795211 | -0.334759 | -3.218833 |
| H | -4.309190 | 0.609084  | -3.319089 |
| H | -2.973561 | 1.155657  | -2.271042 |
| C | -4.816658 | -1.770646 | -2.032130 |
| H | -5.723722 | -1.444246 | -2.559353 |
| H | -4.179305 | -2.314875 | -2.739401 |
| H | -5.100562 | -2.453741 | -1.225298 |
| C | -5.773606 | -0.550793 | 0.439862  |
| H | -6.130215 | 0.070029  | 1.270442  |
| H | -6.640065 | -0.925159 | -0.120887 |
| H | -5.228933 | -1.407261 | 0.850367  |
| C | -5.664360 | 1.439334  | -1.074044 |
| H | -6.400434 | 1.042360  | -1.786643 |
| H | -6.200691 | 1.983268  | -0.286146 |
| H | -5.007553 | 2.141708  | -1.595295 |
| C | -1.292487 | 0.525433  | 0.553569  |
| C | -0.897985 | 1.620707  | 1.422800  |
| O | -0.183990 | -0.118868 | 0.147119  |
| C | 0.441227  | 1.615194  | 1.551133  |
| H | -1.606269 | 2.309438  | 1.862917  |
| C | 0.990322  | 0.487075  | 0.735926  |
| H | 1.068591  | 2.320465  | 2.082100  |
| H | 1.514847  | -0.271673 | 1.325336  |
| C | -2.423697 | -0.866003 | 1.971878  |
| H | -3.262454 | -1.496462 | 1.656503  |
| C | -2.831934 | -0.012609 | 3.163041  |
| H | -1.975526 | 0.547259  | 3.562026  |
| H | -3.620641 | 0.696985  | 2.885327  |
| H | -3.211817 | -0.650104 | 3.978884  |
| C | -1.216600 | -1.746795 | 2.244799  |
| H | -1.441310 | -2.467459 | 3.048102  |
| H | -0.916894 | -2.307389 | 1.352027  |
| H | -0.358751 | -1.146421 | 2.579012  |
| B | -2.690500 | -0.017381 | 0.265701  |
| O | -2.943108 | -1.027970 | -0.706143 |
| O | -3.814898 | 0.861961  | 0.358712  |
| O | 1.695317  | -0.525118 | -2.297964 |
| C | 2.275953  | -0.326024 | -1.250492 |
| C | 2.018886  | 0.936505  | -0.388618 |
| C | 3.222216  | -1.299088 | -0.652369 |
| C | 3.268227  | 1.443148  | 0.320040  |
| C | 4.150497  | -0.887085 | 0.247975  |
| C | 4.303672  | 0.562983  | 0.719384  |
| O | 5.302404  | 0.854491  | 1.400231  |

|    |          |           |           |
|----|----------|-----------|-----------|
| Cl | 3.134464 | -2.924120 | -1.284154 |
| Cl | 5.314233 | -1.991356 | 0.901109  |
| C  | 3.267004 | 2.764415  | 0.807587  |
| C  | 1.388441 | 1.958724  | -1.238469 |
| N  | 0.871467 | 2.774462  | -1.881031 |
| N  | 3.198235 | 3.859445  | 1.219213  |

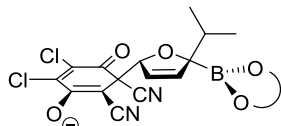

E = -2244.574206 Hartree

|   |           |           |           |
|---|-----------|-----------|-----------|
| C | -3.788417 | -0.534186 | -1.479253 |
| C | -4.281962 | 0.804786  | -0.809777 |
| C | -2.827099 | -0.310376 | -2.648922 |
| H | -2.387565 | -1.272487 | -2.932820 |
| H | -3.360870 | 0.111062  | -3.510286 |
| H | -2.011639 | 0.361604  | -2.371614 |
| C | -4.905745 | -1.488105 | -1.888769 |
| H | -5.548652 | -1.012664 | -2.641241 |
| H | -4.465695 | -2.390998 | -2.327960 |
| H | -5.520706 | -1.780180 | -1.031819 |
| C | -5.626343 | 0.660649  | -0.089614 |
| H | -5.812733 | 1.570167  | 0.493048  |
| H | -6.445042 | 0.524710  | -0.807060 |
| H | -5.611615 | -0.196388 | 0.594208  |
| C | -4.294346 | 2.009822  | -1.743207 |
| H | -4.958118 | 1.819332  | -2.597501 |
| H | -4.665575 | 2.887595  | -1.200295 |
| H | -3.285725 | 2.228386  | -2.102496 |
| C | -1.488474 | -0.340662 | 1.529215  |
| C | -1.091372 | 0.940530  | 2.213667  |
| O | -0.271707 | -0.718787 | 0.806715  |
| C | 0.166854  | 1.271611  | 1.923995  |
| H | -1.777439 | 1.512376  | 2.828864  |
| C | 0.747024  | 0.253095  | 0.982368  |
| H | 0.707901  | 2.156937  | 2.237128  |
| H | 1.655504  | -0.230724 | 1.366910  |
| C | -1.847085 | -1.496276 | 2.499440  |
| H | -1.984175 | -2.383650 | 1.867330  |
| C | -3.170192 | -1.205550 | 3.224700  |
| H | -3.079579 | -0.306283 | 3.849488  |
| H | -3.996261 | -1.046089 | 2.518206  |
| H | -3.439927 | -2.045402 | 3.878727  |
| C | -0.723449 | -1.776575 | 3.503666  |
| H | -0.952167 | -2.678025 | 4.088774  |
| H | 0.228380  | -1.929009 | 2.982999  |
| H | -0.604192 | -0.934876 | 4.198547  |
| B | -2.620067 | -0.142541 | 0.427279  |
| O | -3.018339 | -1.153299 | -0.407663 |
| O | -3.283434 | 1.034607  | 0.222895  |
| O | 0.613910  | -0.708434 | -2.123160 |
| C | 1.461886  | -0.310167 | -1.344815 |
| C | 1.223122  | 0.894540  | -0.414229 |
| C | 2.761025  | -0.991140 | -1.148874 |
| C | 2.473064  | 1.720717  | -0.140548 |
| C | 3.808939  | -0.326187 | -0.596766 |
| C | 3.761220  | 1.135206  | -0.141759 |
| O | 4.831480  | 1.684924  | 0.180425  |

|    |           |           |           |
|----|-----------|-----------|-----------|
| Cl | 2.869417  | -2.616406 | -1.785555 |
| Cl | 5.357015  | -1.089801 | -0.424845 |
| C  | 2.316417  | 3.029069  | 0.356951  |
| C  | 0.134539  | 1.692837  | -0.993502 |
| N  | -0.732126 | 2.313473  | -1.451995 |
| N  | 2.135701  | 4.105092  | 0.785408  |

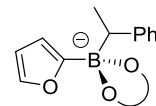

ate-11

E = -951.115505 Hartree

|   |           |           |           |
|---|-----------|-----------|-----------|
| C | -3.836840 | -0.651511 | -0.152571 |
| O | -2.766861 | 0.075984  | -0.584464 |
| C | -1.689411 | -0.182078 | 0.251612  |
| C | -2.114266 | -1.071094 | 1.208493  |
| C | -3.494676 | -1.379434 | 0.951758  |
| B | -0.278707 | 0.598718  | -0.011308 |
| O | 0.675434  | 0.160648  | 1.043536  |
| C | 1.814843  | -0.429969 | 0.441912  |
| C | 2.237866  | -1.651465 | 1.269378  |
| C | 1.329190  | -0.784874 | -1.017239 |
| O | 0.369665  | 0.216800  | -1.292055 |
| C | 0.658362  | -2.172089 | -1.092891 |
| C | 2.436262  | -0.714857 | -2.074770 |
| C | 2.974947  | 0.582407  | 0.439186  |
| C | -0.593692 | 2.245901  | -0.000102 |
| C | -1.303033 | 2.644108  | 1.304099  |
| C | 0.651128  | 3.031362  | -0.273386 |
| H | 0.196484  | -2.274962 | -2.083410 |
| H | 1.386832  | -2.984216 | -0.953571 |
| H | -0.127886 | -2.258548 | -0.337306 |
| H | 3.252931  | -1.410752 | -1.832091 |
| H | 2.021148  | -0.992024 | -3.053421 |
| H | 2.840169  | 0.300043  | -2.143159 |
| H | 3.124951  | 0.938971  | 1.465812  |
| H | 3.907811  | 0.120610  | 0.082999  |
| H | 2.742242  | 1.443988  | -0.189507 |
| H | 3.069343  | -2.185624 | 0.785496  |
| H | 2.569763  | -1.317943 | 2.262041  |
| H | 1.399352  | -2.343335 | 1.399705  |
| H | -1.487084 | -1.447960 | 2.006382  |
| H | -4.145079 | -2.046413 | 1.507114  |
| H | -4.747799 | -0.548966 | -0.727159 |
| H | -1.438652 | 3.735328  | 1.393011  |
| H | -2.287576 | 2.164116  | 1.355185  |
| H | -0.730019 | 2.299557  | 2.176358  |
| H | -1.286109 | 2.404072  | -0.841679 |
| C | 1.170304  | 3.089293  | -1.584465 |
| C | 2.370762  | 3.741859  | -1.867315 |
| C | 3.099055  | 4.365768  | -0.842944 |
| C | 2.597883  | 4.324112  | 0.462040  |
| C | 1.393132  | 3.667339  | 0.739151  |
| H | 0.629697  | 2.570130  | -2.370338 |
| H | 2.748739  | 3.755769  | -2.889047 |
| H | 4.039311  | 4.869996  | -1.059939 |
| H | 3.152266  | 4.794946  | 1.273218  |
| H | 1.032803  | 3.626410  | 1.762916  |

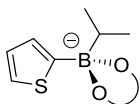

E = -1082.334803 Hartree

|   |           |           |           |
|---|-----------|-----------|-----------|
| C | -3.886744 | -1.281340 | -0.577874 |
| S | -2.690091 | -0.387574 | -1.477912 |
| C | -1.619152 | -0.220821 | -0.101251 |
| C | -2.205230 | -0.840225 | 0.981752  |
| C | -3.480314 | -1.442457 | 0.724474  |
| B | -0.194112 | 0.615012  | -0.177479 |
| O | 0.578982  | 0.291280  | 1.067039  |
| C | 1.780059  | -0.370455 | 0.722847  |
| C | 2.041529  | -1.504189 | 1.723701  |
| C | 1.534440  | -0.865190 | -0.755541 |
| O | 0.683731  | 0.130807  | -1.284494 |
| C | 0.837922  | -2.242297 | -0.799490 |
| C | 2.805305  | -0.940624 | -1.610290 |
| C | 2.947282  | 0.633091  | 0.804214  |
| C | -0.517381 | 2.217212  | -0.355522 |
| C | -1.365050 | 2.757191  | 0.808194  |
| C | 0.754635  | 3.065192  | -0.499093 |
| H | 0.523140  | -2.435768 | -1.832831 |
| H | 1.516445  | -3.045271 | -0.475736 |
| H | -0.051327 | -2.245437 | -0.163747 |
| H | 3.540839  | -1.623850 | -1.159960 |
| H | 2.547400  | -1.315589 | -2.609975 |
| H | 3.259659  | 0.049442  | -1.719960 |
| H | 2.933590  | 1.098645  | 1.798450  |
| H | 3.919711  | 0.140387  | 0.655469  |
| H | 2.826054  | 1.417865  | 0.052621  |
| H | 2.924985  | -2.091926 | 1.431483  |
| H | 2.221694  | -1.075772 | 2.719312  |
| H | 1.175850  | -2.171363 | 1.786157  |
| H | -1.702751 | -0.857117 | 1.945223  |
| H | -4.067050 | -1.973477 | 1.472209  |
| H | -4.797081 | -1.640209 | -1.045701 |
| H | -1.104549 | 2.330873  | -1.285074 |
| H | 1.336667  | 3.030611  | 0.433257  |
| H | 1.390542  | 2.681164  | -1.308087 |
| H | 0.521907  | 4.125436  | -0.707115 |
| H | -1.584477 | 3.834644  | 0.697397  |
| H | -2.317259 | 2.216216  | 0.891732  |
| H | -0.822062 | 2.619047  | 1.755691  |

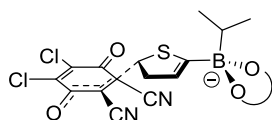

E = -2567.477796 Hartree

|   |          |           |           |
|---|----------|-----------|-----------|
| C | 4.342023 | 1.145482  | 0.069750  |
| C | 3.099330 | 1.628375  | -0.478596 |
| C | 2.041670 | 0.731631  | -0.844289 |
| C | 2.419696 | -0.701228 | -1.164724 |
| C | 3.611130 | -1.220111 | -0.434266 |
| C | 4.503446 | -0.364957 | 0.123150  |
| O | 1.780472 | -1.385408 | -1.940980 |
| C | 0.974836 | 1.235027  | -1.677838 |
| N | 0.104098 | 1.644826  | -2.327774 |

|    |           |           |           |
|----|-----------|-----------|-----------|
| Cl | 3.814639  | -2.945046 | -0.455936 |
| C  | 2.864811  | 3.026602  | -0.450474 |
| N  | 2.633554  | 4.170458  | -0.413507 |
| Cl | 5.936365  | -0.926177 | 0.913373  |
| O  | 5.253327  | 1.866246  | 0.486732  |
| C  | 1.009453  | 0.280260  | 0.900751  |
| S  | -0.299656 | -0.907471 | 0.667921  |
| C  | -1.537943 | 0.266364  | 0.851094  |
| C  | -0.968381 | 1.533490  | 1.159017  |
| C  | 0.405926  | 1.546917  | 1.226496  |
| B  | -3.122401 | -0.113237 | 0.842130  |
| O  | -3.875574 | 0.991721  | 0.205292  |
| C  | -4.679912 | 0.431613  | -0.826462 |
| C  | -4.803589 | 1.436978  | -1.972778 |
| C  | -3.912541 | -0.886663 | -1.205139 |
| O  | -3.413111 | -1.324090 | 0.056410  |
| C  | -2.740153 | -0.611025 | -2.161535 |
| C  | -4.798633 | -1.984715 | -1.794471 |
| C  | -6.077265 | 0.132107  | -0.252523 |
| C  | -3.560363 | -0.348408 | 2.431730  |
| C  | -2.875079 | -1.547457 | 3.095758  |
| C  | -3.440439 | 0.910460  | 3.298911  |
| H  | -2.106689 | -1.504810 | -2.210152 |
| H  | -3.097493 | -0.374190 | -3.172521 |
| H  | -2.127424 | 0.225900  | -1.815147 |
| H  | -5.293149 | -1.630914 | -2.710156 |
| H  | -4.180738 | -2.855911 | -2.047821 |
| H  | -5.561874 | -2.298719 | -1.074881 |
| H  | -6.476549 | 1.053652  | 0.189130  |
| H  | -6.769910 | -0.219224 | -1.030175 |
| H  | -6.006003 | -0.630830 | 0.530104  |
| H  | -5.342874 | 0.992397  | -2.821696 |
| H  | -5.362213 | 2.317464  | -1.628691 |
| H  | -3.815488 | 1.763805  | -2.310370 |
| H  | -1.603981 | 2.401639  | 1.292228  |
| H  | 1.008050  | 2.431358  | 1.411466  |
| H  | 1.907853  | -0.068021 | 1.402841  |
| H  | -4.631001 | -0.585381 | 2.318281  |
| H  | -2.384657 | 1.159250  | 3.484407  |
| H  | -3.908174 | 1.770240  | 2.800779  |
| H  | -3.921102 | 0.773964  | 4.282260  |
| H  | -3.329336 | -1.786040 | 4.072401  |
| H  | -2.941379 | -2.437262 | 2.455714  |
| H  | -1.809023 | -1.341040 | 3.276137  |

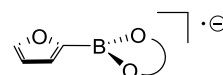

E = -640.745554 Hartree

|   |          |           |           |
|---|----------|-----------|-----------|
| C | 1.113219 | -0.394698 | -0.730562 |
| O | 1.932406 | -0.581839 | 0.355031  |
| C | 1.340793 | -1.564307 | 1.170115  |
| C | 0.170449 | -1.996295 | 0.527441  |
| C | 0.031308 | -1.248083 | -0.667881 |
| B | 1.996858 | -1.983258 | 2.464167  |
| O | 1.493304 | -3.033441 | 3.253141  |
| C | 2.244631 | -3.033608 | 4.481372  |
| C | 2.360641 | -4.466150 | 4.997551  |
| C | 3.607039 | -2.386554 | 4.040190  |
| O | 3.206042 | -1.496114 | 2.982371  |

|   |           |           |           |
|---|-----------|-----------|-----------|
| C | 4.573572  | -3.422849 | 3.448049  |
| C | 4.310927  | -1.581916 | 5.128653  |
| C | 1.481335  | -2.169316 | 5.493828  |
| H | 5.413208  | -2.893957 | 2.981681  |
| H | 4.963594  | -4.094570 | 4.226302  |
| H | 4.068902  | -4.025096 | 2.682954  |
| H | 4.546268  | -2.223513 | 5.989576  |
| H | 5.248853  | -1.172704 | 4.732135  |
| H | 3.685900  | -0.748600 | 5.467490  |
| H | 0.473825  | -2.585098 | 5.621276  |
| H | 1.983519  | -2.151806 | 6.469531  |
| H | 1.387442  | -1.140802 | 5.120615  |
| H | 3.021697  | -4.506549 | 5.875570  |
| H | 1.368814  | -4.831134 | 5.293936  |
| H | 2.757865  | -5.133819 | 4.225041  |
| H | -0.501100 | -2.753335 | 0.913537  |
| H | -0.765226 | -1.320438 | -1.400977 |
| H | 1.441528  | 0.340261  | -1.452235 |

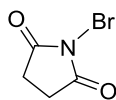

E = -373.2200217 Hartree

|    |           |           |           |
|----|-----------|-----------|-----------|
| N  | -0.079896 | -0.013390 | -0.173785 |
| C  | -0.079052 | -0.032485 | 1.234395  |
| C  | 1.383503  | -0.041692 | 1.668300  |
| C  | 2.209629  | -0.026260 | 0.367513  |
| C  | 1.194955  | -0.008508 | -0.771598 |
| O  | 1.414723  | 0.006908  | -1.959586 |
| H  | 1.558882  | 0.832738  | 2.303969  |
| O  | -1.061078 | -0.039813 | 1.938192  |
| H  | 2.845839  | -0.909564 | 0.247211  |
| H  | 2.850198  | 0.856796  | 0.270874  |
| H  | 1.554705  | -0.933636 | 2.280339  |
| Br | -1.657227 | 0.003614  | -1.175413 |

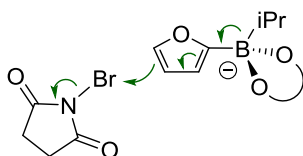

E = -1132.5768145 Hartree

|   |           |          |           |
|---|-----------|----------|-----------|
| C | -3.161304 | 2.467787 | 0.039247  |
| C | -3.959207 | 1.711979 | 1.160940  |
| C | -1.931101 | 3.203201 | 0.591835  |
| H | -1.312036 | 3.530682 | -0.250620 |
| H | -2.220042 | 4.079493 | 1.186486  |
| H | -1.333028 | 2.532064 | 1.218305  |
| C | -3.999083 | 3.422355 | -0.807384 |
| H | -4.436189 | 4.209571 | -0.177907 |
| H | -3.359554 | 3.894571 | -1.562768 |
| H | -4.804810 | 2.888915 | -1.320845 |
| C | -5.401715 | 1.395646 | 0.738954  |
| H | -5.841288 | 0.705740 | 1.469060  |
| H | -6.011188 | 2.307905 | 0.702048  |
| H | -5.422003 | 0.920645 | -0.246737 |
| C | -3.969104 | 2.417589 | 2.515597  |
| H | -4.433722 | 3.409367 | 2.428290  |

|    |           |           |           |
|----|-----------|-----------|-----------|
| H  | -4.548261 | 1.823818  | 3.234016  |
| H  | -2.952689 | 2.534411  | 2.902440  |
| C  | -1.355292 | -0.681811 | 0.018211  |
| C  | -1.019237 | -1.735536 | 0.964776  |
| O  | -0.467957 | -0.714934 | -1.000528 |
| C  | 0.034865  | -2.417129 | 0.474537  |
| H  | -1.549680 | -1.888039 | 1.895761  |
| C  | 0.463651  | -1.796256 | -0.803054 |
| H  | 0.572579  | -3.239290 | 0.931306  |
| C  | -3.228821 | -1.408612 | -0.871993 |
| H  | -2.518879 | -2.192996 | -1.142420 |
| C  | -3.789546 | -0.816306 | -2.159228 |
| H  | -4.534775 | -0.038193 | -1.959490 |
| H  | -2.995009 | -0.363015 | -2.762636 |
| H  | -4.270752 | -1.612853 | -2.753739 |
| C  | -4.275875 | -1.987207 | 0.067725  |
| H  | -4.824849 | -2.804315 | -0.432630 |
| H  | -3.814968 | -2.395786 | 0.975748  |
| H  | -5.000668 | -1.228499 | 0.377339  |
| B  | -2.537477 | 0.268984  | 0.058297  |
| O  | -2.697926 | 1.391961  | -0.789403 |
| O  | -3.227676 | 0.482547  | 1.287256  |
| H  | 0.443045  | -2.444916 | -1.683143 |
| Br | 2.371212  | -1.117109 | -0.676164 |
| N  | 4.857364  | -0.356710 | -0.483673 |
| C  | 5.508833  | 0.523375  | -1.299314 |
| C  | 5.677967  | -0.806457 | 0.509234  |
| C  | 6.971748  | 0.737972  | -0.828527 |
| C  | 7.086322  | -0.165747 | 0.401128  |
| H  | 7.652110  | 0.467729  | -1.646124 |
| H  | 7.833831  | -0.963113 | 0.301452  |
| O  | 5.047230  | 1.097242  | -2.289193 |
| O  | 5.391287  | -1.614519 | 1.398242  |
| H  | 7.123330  | 1.803680  | -0.614948 |
| H  | 7.303948  | 0.372854  | 1.332261  |

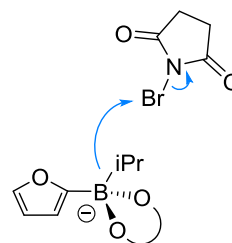

E = -1132.5702497 Hartree

|    |           |           |           |
|----|-----------|-----------|-----------|
| C  | -6.492228 | 0.629746  | 0.346511  |
| C  | -5.011835 | 1.007786  | 0.126162  |
| N  | -4.254415 | -0.140962 | 0.079306  |
| C  | -5.003149 | -1.285987 | 0.228405  |
| C  | -6.486244 | -0.902114 | 0.415301  |
| Br | -2.053238 | -0.159599 | -0.232042 |
| C  | 0.376263  | -0.359729 | -0.886742 |
| C  | 0.450506  | -1.871834 | -0.945910 |
| O  | -4.594771 | -2.439786 | 0.218810  |
| O  | -4.612925 | 2.158991  | 0.014652  |
| B  | 2.149617  | 0.202679  | -0.184734 |
| O  | 2.222761  | -0.324919 | 1.154004  |
| C  | 3.569254  | -0.756036 | 1.346246  |
| C  | 3.596745  | -1.856831 | 2.406507  |

|   |           |           |           |
|---|-----------|-----------|-----------|
| C | 2.095003  | 1.778944  | -0.392658 |
| C | 1.191927  | 3.795605  | -0.160439 |
| C | 2.261099  | 3.957560  | -0.995303 |
| C | 2.840047  | 2.651302  | -1.145007 |
| H | 2.586356  | 4.886255  | -1.449019 |
| O | 3.190365  | -0.413413 | -0.958926 |
| C | 3.996493  | -1.227837 | -0.097257 |
| C | 3.697229  | -2.712199 | -0.350855 |
| C | 5.467875  | -0.963903 | -0.434226 |
| C | 4.397679  | 0.443720  | 1.842598  |
| C | 0.265985  | 0.341985  | -2.229902 |
| H | 0.447208  | 4.468117  | 0.241275  |
| H | 3.941624  | 0.817947  | 2.766866  |
| H | 5.438211  | 0.157908  | 2.047343  |
| H | 4.385548  | 1.251121  | 1.103253  |
| H | 4.611803  | -2.265081 | 2.511487  |
| H | 3.287197  | -1.437001 | 3.371596  |
| H | 2.911057  | -2.669593 | 2.149182  |
| H | 3.798903  | -2.913019 | -1.424497 |
| H | 4.405631  | -3.348480 | 0.197023  |
| H | 2.682736  | -2.972911 | -0.044845 |
| H | 6.126985  | -1.494181 | 0.267587  |
| H | 5.677164  | -1.325491 | -1.449129 |
| H | 5.694279  | 0.105963  | -0.394686 |
| H | 0.140221  | 0.156003  | 0.051297  |
| H | 1.327690  | -2.160622 | -1.539672 |
| H | 0.548762  | -2.301056 | 0.056923  |
| H | -0.439767 | -2.305636 | -1.423035 |
| H | -0.535647 | -0.099107 | -2.840465 |
| H | 0.057893  | 1.409517  | -2.108342 |
| H | 1.213109  | 0.237814  | -2.781209 |
| H | 3.694616  | 2.368872  | -1.746377 |
| H | -6.832786 | -1.303047 | 1.375223  |
| H | -6.842962 | 1.112330  | 1.266462  |
| H | -7.074625 | -1.383250 | -0.375002 |
| H | -7.083579 | 1.033224  | -0.483993 |
| O | 1.080023  | 2.492008  | 0.212945  |

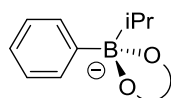

E = -761.5789701 Hartree

|   |           |           |           |
|---|-----------|-----------|-----------|
| C | -3.757469 | -0.485058 | 0.043502  |
| C | -3.168403 | -0.057569 | -1.155154 |
| C | -1.816859 | 0.308404  | -1.180282 |
| C | -1.003893 | 0.258106  | -0.031593 |
| C | -1.622283 | -0.172738 | 1.156958  |
| C | -2.974037 | -0.540099 | 1.204197  |
| B | 0.572087  | 0.722138  | -0.092812 |
| O | 1.314549  | 0.159506  | 1.091659  |
| C | 2.316005  | -0.731664 | 0.647333  |
| C | 2.370841  | -1.947492 | 1.582849  |
| H | -4.808391 | -0.771792 | 0.071041  |
| C | 1.885381  | -1.079492 | -0.829975 |
| O | 1.277274  | 0.115610  | -1.270595 |
| C | 0.874625  | -2.246364 | -0.876563 |
| C | 3.055986  | -1.420884 | -1.759979 |
| C | 3.683611  | -0.021525 | 0.687400  |
| C | 0.633412  | 2.366872  | -0.170581 |

|   |           |           |           |
|---|-----------|-----------|-----------|
| C | -0.006106 | 3.011092  | 1.070838  |
| C | 2.060292  | 2.905615  | -0.345133 |
| H | 0.458503  | -2.301982 | -1.890541 |
| H | 1.357588  | -3.204538 | -0.634599 |
| H | 0.050406  | -2.076525 | -0.178896 |
| H | 3.625245  | -2.279163 | -1.372882 |
| H | 2.666774  | -1.680406 | -2.753974 |
| H | 3.730783  | -0.565095 | -1.866222 |
| H | 3.829057  | 0.392852  | 1.693679  |
| H | 4.509332  | -0.713795 | 0.464388  |
| H | 3.702590  | 0.800271  | -0.033096 |
| H | 3.079469  | -2.701230 | 1.207070  |
| H | 2.701568  | -1.624958 | 2.579848  |
| H | 1.381331  | -2.405756 | 1.678796  |
| H | 0.044322  | 2.673547  | -1.054387 |
| H | 2.659093  | 2.669523  | 0.546032  |
| H | 2.550086  | 2.442288  | -1.212222 |
| H | 2.075407  | 4.003294  | -0.476369 |
| H | 0.034459  | 4.115131  | 1.035162  |
| H | -1.056154 | 2.708445  | 1.182717  |
| H | 0.531044  | 2.683458  | 1.974088  |
| H | -1.363880 | 0.626464  | -2.119098 |
| H | -1.010228 | -0.231098 | 2.055848  |
| H | -3.418558 | -0.872578 | 2.143190  |
| H | -3.764826 | -0.015177 | -2.067417 |

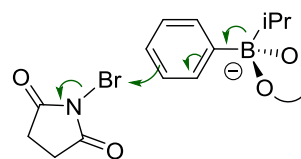

E = -1134.7813526 Hartree

|    |           |           |           |
|----|-----------|-----------|-----------|
| C  | 0.314747  | -1.709379 | -1.397409 |
| C  | 1.032271  | -2.136325 | -0.191855 |
| C  | 0.308102  | -1.945862 | 1.068674  |
| C  | -0.891007 | -1.306481 | 1.122658  |
| C  | -1.549204 | -0.825233 | -0.072897 |
| C  | -0.884210 | -1.071849 | -1.335110 |
| Br | 2.837240  | -0.905885 | -0.071610 |
| H  | 0.802961  | -2.265878 | 1.982944  |
| B  | -2.911414 | -0.141621 | -0.018524 |
| O  | -3.420609 | 0.419235  | 1.190507  |
| C  | -4.404541 | 1.401620  | 0.846005  |
| C  | -5.799777 | 0.762934  | 0.916772  |
| H  | 0.814893  | -1.850038 | -2.353006 |
| O  | -3.469937 | 0.560778  | -1.131006 |
| C  | -4.000235 | 1.788920  | -0.621182 |
| C  | -5.162482 | 2.238840  | -1.504129 |
| C  | -2.881941 | 2.842842  | -0.656054 |
| C  | -4.323728 | 2.551620  | 1.849034  |
| C  | -3.413691 | -2.107763 | -0.180077 |
| C  | -4.334825 | -2.122618 | -1.391097 |
| C  | -4.095001 | -2.422294 | 1.142122  |
| N  | 4.900746  | 0.391628  | 0.041678  |
| C  | 5.493557  | 0.978442  | -1.042782 |
| C  | 6.780506  | 1.724853  | -0.612112 |
| C  | 6.858032  | 1.475690  | 0.897262  |
| C  | 5.607283  | 0.611109  | 1.192329  |
| O  | 5.102377  | 0.945618  | -2.208857 |

|   |           |           |           |
|---|-----------|-----------|-----------|
| O | 5.332408  | 0.202007  | 2.319816  |
| H | 1.542900  | -3.097048 | -0.281906 |
| H | -2.515813 | 2.931609  | -1.685358 |
| H | -3.242538 | 3.823671  | -0.319762 |
| H | -2.046747 | 2.534500  | -0.017312 |
| H | -5.646277 | 3.128446  | -1.077670 |
| H | -4.785151 | 2.492747  | -2.502399 |
| H | -5.908269 | 1.444420  | -1.608099 |
| H | -5.943317 | 0.336891  | 1.916846  |
| H | -6.585707 | 1.507120  | 0.732531  |
| H | -5.896229 | -0.039450 | 0.179134  |
| H | -4.994176 | 3.369532  | 1.550670  |
| H | -4.629251 | 2.194780  | 2.840622  |
| H | -3.302226 | 2.936460  | 1.920204  |
| H | -2.603690 | -2.818527 | -0.343570 |
| H | -5.157733 | -1.406887 | -1.286085 |
| H | -3.791424 | -1.863686 | -2.307468 |
| H | -4.766893 | -3.131768 | -1.517798 |
| H | -4.509781 | -3.446069 | 1.116653  |
| H | -3.384141 | -2.366852 | 1.975359  |
| H | -4.911293 | -1.725506 | 1.353574  |
| H | -1.366779 | -0.708857 | -2.239068 |
| H | -1.373025 | -1.117159 | 2.078072  |
| H | 6.682234  | 2.783176  | -0.883776 |
| H | 6.806390  | 2.389410  | 1.502209  |
| H | 7.752174  | 0.923299  | 1.211826  |
| H | 7.630305  | 1.318825  | -1.174718 |

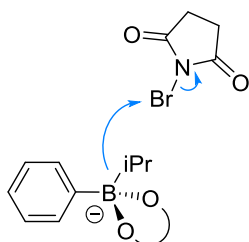

E = -1134.7970374 Hartree

|    |           |           |           |
|----|-----------|-----------|-----------|
| C  | -6.378164 | 0.305134  | 1.130154  |
| C  | -4.847216 | 0.490662  | 1.192394  |
| N  | -4.265729 | -0.212175 | 0.161154  |
| C  | -5.180938 | -0.873707 | -0.625103 |
| C  | -6.601083 | -0.604447 | -0.084554 |
| Br | -2.074771 | -0.282033 | -0.198493 |
| C  | 0.355757  | -0.515915 | -0.914859 |
| C  | 0.372711  | -2.019371 | -1.093502 |
| O  | -4.943870 | -1.571422 | -1.602394 |
| O  | -4.275423 | 1.163053  | 2.039415  |
| B  | 2.124578  | -0.033111 | -0.159790 |
| O  | 2.176620  | -0.664943 | 1.139146  |
| C  | 3.511736  | -1.139153 | 1.301059  |
| C  | 3.514626  | -2.302773 | 2.292076  |
| C  | 2.082559  | 1.569046  | -0.200062 |
| C  | 1.225049  | 2.292873  | 0.648491  |
| C  | 1.168775  | 3.689698  | 0.615513  |
| C  | 1.979997  | 4.402743  | -0.277607 |
| C  | 2.842599  | 3.703339  | -1.130445 |
| C  | 2.887211  | 2.304258  | -1.087544 |
| H  | 0.488837  | 4.221321  | 1.278884  |
| H  | 3.476137  | 4.248059  | -1.829740 |

|   |           |           |           |
|---|-----------|-----------|-----------|
| O | 3.145998  | -0.635743 | -0.973996 |
| C | 3.923734  | -1.530512 | -0.169874 |
| C | 3.575146  | -2.985182 | -0.516597 |
| C | 5.403483  | -1.295935 | -0.490932 |
| C | 4.372350  | 0.007409  | 1.866287  |
| C | 0.253086  | 0.289037  | -2.198195 |
| H | 1.936308  | 5.490143  | -0.310322 |
| H | 3.928646  | 0.337865  | 2.812868  |
| H | 5.405226  | -0.317880 | 2.049638  |
| H | 4.381833  | 0.858691  | 1.177781  |
| H | 4.518693  | -2.743364 | 2.367368  |
| H | 3.219790  | -1.934877 | 3.282652  |
| H | 2.806797  | -3.079977 | 1.988694  |
| H | 3.667332  | -3.119200 | -1.601424 |
| H | 4.263733  | -3.678608 | -0.014590 |
| H | 2.553480  | -3.230279 | -0.222150 |
| H | 6.043482  | -1.889918 | 0.176870  |
| H | 5.602571  | -1.601364 | -1.526216 |
| H | 5.664589  | -0.238764 | -0.385695 |
| H | 0.113913  | -0.080232 | 0.060433  |
| H | 1.245817  | -2.293983 | -1.699782 |
| H | 0.443208  | -2.530164 | -0.127064 |
| H | -0.527687 | -2.377182 | -1.613187 |
| H | -0.569616 | -0.076251 | -2.830023 |
| H | 0.091964  | 1.351530  | -1.994513 |
| H | 1.191382  | 0.190375  | -2.766056 |
| H | 0.585031  | 1.750819  | 1.342602  |
| H | 3.556256  | 1.759762  | -1.750920 |
| H | -7.069823 | -1.564614 | 0.161592  |
| H | -6.716090 | -0.131512 | 2.077433  |
| H | -7.196146 | -0.141203 | -0.880496 |
| H | -6.846577 | 1.291950  | 1.035881  |

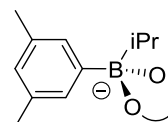

E = -840.2217759 Hartree

|   |           |           |           |
|---|-----------|-----------|-----------|
| C | 1.527033  | -0.921371 | -0.691972 |
| C | 1.788822  | -0.365455 | 0.571767  |
| C | 1.467322  | -1.109279 | 1.712683  |
| C | 0.906931  | -2.399497 | 1.646118  |
| C | 0.666446  | -2.915481 | 0.363401  |
| C | 0.961632  | -2.197286 | -0.806791 |
| B | 0.517323  | -3.216506 | 3.017983  |
| O | 0.366080  | -4.684562 | 2.712916  |
| C | 1.340336  | -5.421073 | 3.421470  |
| C | 1.885671  | -6.541284 | 2.525036  |
| H | 1.767597  | -0.354364 | -1.593482 |
| C | 2.415554  | -4.339195 | 3.822588  |
| O | 1.636207  | -3.178795 | 4.017655  |
| C | 3.449511  | -4.110947 | 2.697799  |
| C | 3.174718  | -4.657643 | 5.116127  |
| C | 0.689908  | -6.063145 | 4.663252  |
| C | -0.846232 | -2.544931 | 3.654274  |
| C | -2.032789 | -2.662991 | 2.683321  |
| C | -1.236832 | -3.146193 | 5.011912  |
| H | 4.037532  | -3.217978 | 2.945544  |
| H | 4.128366  | -4.970677 | 2.597118  |

|   |           |           |           |
|---|-----------|-----------|-----------|
| H | 2.950500  | -3.936384 | 1.740957  |
| H | 3.702107  | -5.619731 | 5.033862  |
| H | 3.915722  | -3.869012 | 5.305344  |
| H | 2.489083  | -4.698794 | 5.968822  |
| H | -0.190388 | -6.632226 | 4.336820  |
| H | 1.382572  | -6.744307 | 5.180091  |
| H | 0.363624  | -5.288267 | 5.361888  |
| H | 2.712477  | -7.074020 | 3.019065  |
| H | 1.083560  | -7.262196 | 2.314326  |
| H | 2.242401  | -6.134958 | 1.573031  |
| H | -0.638645 | -1.470032 | 3.808208  |
| H | -1.516282 | -4.202429 | 4.888191  |
| H | -0.394949 | -3.101000 | 5.715893  |
| H | -2.101148 | -2.623952 | 5.462099  |
| H | -2.957592 | -2.222877 | 3.099134  |
| H | -1.815760 | -2.169401 | 1.726211  |
| H | -2.229966 | -3.724901 | 2.470946  |
| H | 1.673847  | -0.684698 | 2.695839  |
| H | 0.243217  | -3.917144 | 0.285961  |
| C | 0.654206  | -2.786402 | -2.168142 |
| C | 2.437108  | 0.998682  | 0.686864  |
| H | 1.138698  | -2.212641 | -2.970850 |
| H | 0.996817  | -3.828651 | -2.236319 |
| H | -0.428659 | -2.790835 | -2.366989 |
| H | 2.014461  | 1.708873  | -0.039169 |
| H | 2.297986  | 1.413774  | 1.693796  |
| H | 3.521165  | 0.947675  | 0.497533  |

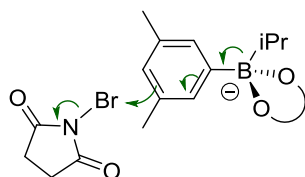

E = -1213.4336166 Hartree

|    |           |           |           |
|----|-----------|-----------|-----------|
| C  | -5.402509 | 1.159036  | 1.031107  |
| N  | -4.807987 | 0.605410  | -0.067699 |
| C  | -5.486384 | 0.902765  | -1.215903 |
| C  | -6.717235 | 1.790494  | -0.902671 |
| C  | -6.657053 | 1.968776  | 0.617506  |
| Br | -2.739998 | -0.757864 | 0.038310  |
| O  | -5.202749 | 0.539628  | -2.358353 |
| O  | -5.033897 | 1.057034  | 2.202102  |
| C  | -0.972924 | -1.998906 | 0.165786  |
| C  | -0.239048 | -1.842601 | -1.108229 |
| C  | 0.960953  | -1.201961 | -1.136814 |
| C  | 1.603409  | -0.707929 | 0.058720  |
| C  | 0.943466  | -0.965742 | 1.318399  |
| C  | -0.257060 | -1.599747 | 1.396688  |
| C  | -0.897855 | -2.347899 | -2.363127 |
| C  | -0.934868 | -1.854594 | 2.715852  |
| B  | 2.959298  | -0.012914 | 0.009393  |
| O  | 3.509905  | 0.692321  | 1.123675  |
| C  | 4.038746  | 1.921478  | 0.614999  |
| C  | 2.916392  | 2.971352  | 0.641358  |
| C  | 3.469852  | -1.982230 | 0.177419  |
| C  | 4.167453  | -2.292702 | -1.137200 |
| O  | 3.474224  | 0.546560  | -1.197386 |
| C  | 4.452889  | 1.532918  | -0.848986 |

|   |           |           |           |
|---|-----------|-----------|-----------|
| C | 4.374183  | 2.680697  | -1.854688 |
| C | 4.378405  | -1.989922 | 1.397757  |
| C | 5.850732  | 0.898976  | -0.909744 |
| C | 5.193957  | 2.377420  | 1.504087  |
| H | -1.471233 | -2.968172 | 0.255840  |
| H | 2.544154  | 3.061037  | 1.668378  |
| H | 3.275240  | 3.952730  | 0.304764  |
| H | 2.085911  | 2.658380  | -0.001243 |
| H | 5.677048  | 3.267954  | 1.078751  |
| H | 4.809489  | 2.632062  | 2.499451  |
| H | 5.942161  | 1.586136  | 1.614566  |
| H | 6.001985  | 0.470940  | -1.907831 |
| H | 6.632795  | 1.646499  | -0.722513 |
| H | 5.945395  | 0.098849  | -0.169373 |
| H | 5.040028  | 3.501451  | -1.553788 |
| H | 4.686879  | 2.323100  | -2.843774 |
| H | 3.351835  | 3.061936  | -1.932718 |
| H | 2.662293  | -2.697502 | 0.332441  |
| H | 5.196800  | -1.267806 | 1.300991  |
| H | 3.823274  | -1.734739 | 2.308178  |
| H | 4.817184  | -2.995565 | 1.529724  |
| H | 4.586778  | -3.314628 | -1.107783 |
| H | 3.465757  | -2.239620 | -1.978184 |
| H | 4.983227  | -1.592568 | -1.339203 |
| H | 1.437547  | -0.626005 | 2.225881  |
| H | 1.461933  | -1.036268 | -2.087519 |
| H | -1.169083 | -3.409106 | -2.255853 |
| H | -1.828156 | -1.798409 | -2.558328 |
| H | -0.230781 | -2.240725 | -3.227107 |
| H | -1.218774 | -2.914098 | 2.805660  |
| H | -0.274967 | -1.594645 | 3.552471  |
| H | -1.859491 | -1.267594 | 2.793499  |
| H | -6.527130 | 3.009983  | 0.938129  |
| H | -6.630096 | 2.728381  | -1.465185 |
| H | -7.621849 | 1.279193  | -1.254920 |
| H | -7.529647 | 1.568331  | 1.148491  |

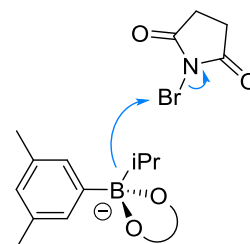

E = -1213.4412676 Hartree

|   |          |           |           |
|---|----------|-----------|-----------|
| C | 1.065869 | 3.937210  | -0.102555 |
| C | 0.324147 | 3.060941  | 0.700309  |
| C | 0.686125 | 1.706514  | 0.717328  |
| C | 1.738787 | 1.202146  | -0.060861 |
| C | 2.459018 | 2.114995  | -0.851299 |
| C | 2.143812 | 3.478828  | -0.877110 |
| B | 2.042798 | -0.372434 | -0.097862 |
| O | 3.176047 | -0.767825 | -0.894318 |
| C | 4.035272 | -1.600764 | -0.108564 |
| C | 5.482501 | -1.162411 | -0.351060 |
| H | 0.790835 | 4.992481  | -0.135093 |
| C | 3.523499 | -1.351298 | 1.361736  |
| O | 2.139775 | -1.069964 | 1.167091  |

|   |           |           |           |    |           |           |           |
|---|-----------|-----------|-----------|----|-----------|-----------|-----------|
| C | 4.187440  | -0.122130 | 2.011018  | H  | 3.273155  | 1.739274  | -1.469492 |
| C | 3.667519  | -2.552949 | 2.295055  | C  | 2.944889  | 4.447705  | -1.720762 |
| C | 3.880882  | -3.063859 | -0.545978 | C  | -0.856733 | 3.541214  | 1.514864  |
| C | 0.412759  | -1.070423 | -0.959613 | H  | 3.595925  | 5.080638  | -1.097988 |
| C | 0.318826  | -0.295281 | -2.260883 | H  | 3.585223  | 3.910808  | -2.432625 |
| C | 0.522945  | -2.571268 | -1.103122 | H  | 2.288403  | 5.120834  | -2.290648 |
| H | 3.664605  | 0.097423  | 2.949435  | H  | -1.095899 | 4.588391  | 1.284552  |
| H | 5.248963  | -0.304726 | 2.226104  | H  | -1.747290 | 2.928540  | 1.320196  |
| H | 4.098545  | 0.752475  | 1.358416  | H  | -0.645507 | 3.473602  | 2.592738  |
| H | 4.722901  | -2.846302 | 2.386185  | Br | -2.044732 | -0.782464 | -0.307888 |
| H | 3.292089  | -2.285765 | 3.290816  | N  | -4.223000 | -0.482111 | 0.062149  |
| H | 3.091593  | -3.407754 | 1.927560  | C  | -5.219625 | -1.355638 | -0.305915 |
| H | 4.019851  | -3.122338 | -1.632688 | C  | -4.697707 | 0.643309  | 0.694524  |
| H | 4.632341  | -3.699530 | -0.057770 | C  | -6.584056 | -0.777737 | 0.127491  |
| H | 2.887204  | -3.442750 | -0.301032 | C  | -6.235265 | 0.560373  | 0.791797  |
| H | 6.167439  | -1.704967 | 0.315929  | H  | -7.067982 | -1.493143 | 0.802969  |
| H | 5.760837  | -1.382063 | -1.389975 | H  | -6.523566 | 0.618983  | 1.848013  |
| H | 5.598158  | -0.087850 | -0.181259 | O  | -5.083817 | -2.425961 | -0.884004 |
| H | 0.072603  | -0.660529 | -0.003007 | O  | -4.035766 | 1.580221  | 1.123627  |
| H | 1.398279  | -2.802586 | -1.725379 | H  | -7.220766 | -0.678754 | -0.759597 |
| H | 0.652042  | -3.051399 | -0.126742 | H  | -6.665459 | 1.431471  | 0.283520  |
| H | -0.360804 | -3.002964 | -1.595148 |    |           |           |           |
| H | -0.439601 | -0.730320 | -2.928647 |    |           |           |           |
| H | 0.069171  | 0.754555  | -2.085431 |    |           |           |           |
| H | 1.292485  | -0.335100 | -2.773558 |    |           |           |           |
| H | 0.101503  | 1.023923  | 1.332408  |    |           |           |           |
